# Supplementary material for: Unaddressed privacy risks in accredited health and wellness apps: a cross-sectional systematic assessment
Source: BMC Med. 2015 Sep 7;13:214. doi: 10.1186/s12916-015-0444-y (PMC4582624; doi:10.1186/s12916-015-0444-y)
Supplement: Additional file 2: — NHS health apps and privacy: dataset. (XLSX 1569 kb) [file 12916_2015_444_MOESM2_ESM.xlsx]

## Sheet: Inclusion & Exclusion Criteria
We will include any app that…
Is available through the marketplace on any of the selected platforms (Windows Phone 7, iPhone, iPad, Android and Blackberry)
Contains any information relating to the medical or social management of asthma OR tools designed to support the same OR both
We will not restrict choices by...
Compliance with particular national guidelines for asthma
Cost of the app
The target audience for the app (on the basis that app content is freely accessible to all users)
We will exclude any app that…
Contains no content relating to asthma (even if the product description indicates that it does)
Is not available through an approved device marketplace
Is not in English

## Sheet: Apps
#	TextPart	SourceFileType	TranmisssionType	TypeCode		Field	Format	Instructions	4501 iOS aidsmap news (Col 10)	4502 iOS Antifungal Interactions (Col 11)	4503 Android Antifungal Interactions (Col 12)	4504 iOS The British Heart Foundation Recipe Finder (Col 13)	4505 Android BHF Recipe Finder (Col 14)	4506 iOS Brush DJ (Col 15)	4507 Android Brush DJ (Col 16)	4508 iOS BSUHealth (Col 17)	4509 Android BSUHealth (Col 18)	4510 iOS Nutracheck (Col 19)	4511 Android Nutracheck (Col 20)	4512 Android Cancer Emergency Response Tool (Col 21)	4513 iOS CarePair (Col 22)	4514 iOS DrinksTracker (Col 23)	4515 Android DrinksTracker (Col 24)	4516 iOS FunGenerator (Col 25)	4517 Android FunGenerator (Col 26)	4518 iOS BeFoodSmart (Col 27)	4519 Android BeFoodSmart (Col 28)	4520 iOS Coronary Angiogram (Col 29)	4521 iOS Dentify (Col 30)	4522 Android Dentify (Col 31)	4523 iOS Depression (Col 32)	4524 iOS Diabetes (Col 33)	4525 iOS Diabetes (Col 34)	4526 Android Diabetes Risk Checker (Col 35)	4527 iOS D Tracker (Col 36)	4528 Android Diabetes UK Tracker (Col 37)	4529 iOS Dr iSeb (Col 38)	4530 iOS DrinkCoach (Col 39)	4531 iOS drinks meter (Col 40)	4532 Android drinks meter (Col 41)	4533 iOS Epilepsy Tool Kit (Col 42)	4534 iOS eRedbook (Col 43)	4535 iOS Fairfield Park (Col 44)	4536 Android Fairfield Park Health Centre (Col 45)	4537 Android Find NHS Services (Col 46)	4538 Android FinerDay (Col 47)	4539 iOS FolUp for Patient (Col 48)	4540 Android Folup (Col 49)	4541 iOS FoodWiz (Col 50)
0.1a						App ID	Autonumber	Assigned automatically, do not alter.	4501	4502	4503	4504	4505	4506	4507	4508	4509	4510	4511	4512	4513	4514	4515	4516	4517	4518	4519	4520	4521	4522	4523	4524	4525	4526	4527	4528	4529	4530	4531	4532	4533	4534	4535	4536	4537	4538	4539	4540	4541
0.1b						Linked IDs	Comma-separated numbers	Add a comma-separated list of the IDs of any apps that are either the same across platforms or versions (e.g. Lite and Pro)		4503	4502	4505	4504	4507	4506	4509	4508	4511	4510			4515	4514	4517	4516	4519	4518		4522	4521			4526	4525	4528	4527			4532	4531			4536	4535			4540	4539	4542
0.2						Date of review	Date	Write the date on which you reviewed the app.	19/08/2013-17/12/2013
0.3						Reviewer	Text	Pick your initials from the dropdown list.	KH/JTP	KH/JTP	KH/JTP	KH/JTP	KH/JTP	KH/JTP	KH/JTP	KH/JTP	KH/JTP	KH/JTP	KH/JTP	KH/JTP	KH/JTP	KH/JTP	KH/JTP	KH/JTP	KH/JTP	KH/JTP	KH/JTP	KH/JTP	KH/JTP	KH/JTP	KH/JTP	KH/JTP	KH/JTP	KH/JTP	KH/JTP	KH/JTP	KH/JTP	KH/JTP	KH/JTP	KH/JTP	KH/JTP	KH/JTP	KH/JTP	KH/JTP	KH/JTP	KH/JTP	KH/JTP	KH/JTP	KH/JTP
0.4						Downloaded	Yes/No	Pick Yes or No depending on whether the app has been downloaded successfully.	Yes	Yes	Yes	Yes	Yes	Yes	Yes	Yes	Yes	Yes	Yes	Yes	Yes	Yes	Yes	Yes	Yes	Yes	Yes	Yes	Yes	Yes	Yes	Yes	Yes	Yes	Yes	Yes	Yes	Yes	Yes	Yes	Yes	Yes	Yes	Yes	Yes	Yes	No	Yes	Yes
0.5a						iOS	Yes/No	Pick Yes if the app runs on iOS	iPhone	iPhone	No	iPhone	No	iPhone/iPad	No	iPhone	No	iPhone	No	No	iPhone	iPhone/iPad	No	iPhone/iPad	No	iPhone/iPad	No	iPhone	iPhone/iPad	No	iPhone	iPhone	iPhone	No	iPhone	No	iPhone	iPhone/iPad	iPhone	No	iPhone	iPhone	iPhone	No	No	No	iPhone	No	iPhone
0.5b						Android	Yes/No	Pick Yes if the app runs on Android	No	No	Android	No	Android	No	Android	No	Android Phone	No	Android Phone	Android Phone	No	No	Android	No	Android	No	Android	No	No	Android	No	No	No	Android	No	Android	No	No	No	Android	No	No	No	Android Phone	Android	Android	No	Android	No
0.6a						Include or Exclude?	Pick from List	Write your decision whether to include or exclude the app (see inclusion/exclusion criteria sheet)	Include	Include	Include (Platform Duplicate)	Include	Include (Platform Duplicate)	Include	Include (Platform Duplicate)	Include	Include (Platform Duplicate)	Include	Include (Platform Duplicate)	Include	Include	Include	Include (Platform Duplicate)	Include	Include (Platform Duplicate)	Include	Include (Platform Duplicate)	Include	Include	Include (Platform Duplicate)	Include	Include	Include	Include (Platform Duplicate)	Include	Include (Platform Duplicate)	Include	Include	Include	Include (Platform Duplicate)	Include	Exclude (Could not log in)	Include	Include (Platform Duplicate)	Include	Include	Exclude (Unavailable)	Exclude (Platform Duplicate)	Exclude (Could not log in)
0.6b						If EXCLUDE, provide reason	Text	Use free text to explain your reasoning to exclude a particular app.																																		Unable to log in. Requires credentials not available to us.					Not available for download.	Unable to log in. Requires credentials not available to us.	Unable to log in.
0.7						Brief description	Text	Write a brief description to help us remember this app (e.g. the diary app with the big data entry bug)	News stories concerning HIV	Drug interactions database for antifungal medications.	Drug interactions database for antifungal medications.	Recipe finder	Recipe finder	Musical cothbrushing timer with optional reminders	Musical cothbrushing timer with optional reminders	Healthcare services information for Bath Spa University	Healthcare services information for Bath Spa University	Cloud-based calorie counting and weight management app.	Cloud-based calorie counting and weight management app.	Brief assessment and advice for patients receiving chemotherapy	Service to find (or offer) carer support for jobs specified by user (e.g. assisstance getting dressed)	NHS Change for Life programme drinks tracker with unit calculator	NHS Change for Life programme drinks tracker with unit calculator	Activity suggestions for children	Activity suggestions for children	Healthy recipe suggestions app.	Healthy recipe suggestions app.	Personal medical information store and information resources for patients undergoing coronary angiogram.	Dental health information	Dental health information	Patient.co.uk depression questionnaire	Patient.co.uk diabetes diary	QDiabetes risk calculator.	QDiabetes risk calculator.	Personal diabetes diary	Personal diabetes diary	Communicable disease risk, prevention, symptom and treatment information for global locations	Cravings and drinks diary and motivational tools for alcohol intake reduction.	Alcohol questionnaire with tailored advice.	Alcohol questionnaire with tailored advice.	Epilepsy personal information manager and information		Health services information for Fairfield Park Health Centre	Health services information for Fairfield Park Health Centre	Location-based NHS service finder	Cloud-synced simplified PIM/social network
0.8						Taxonomy	Text		Information	Information	Information	Information	Information	Utility Function (Tooth Brushing Timer), Reminders	Utility Function (Tooth Brushing Timer), Reminders	Information, Health Promotion (Smoking, Alcohol, Drugs, Sexual Health), Service Directory	Information, Health Promotion (Smoking, Alcohol, Drugs, Sexual Health), Service Directory	Health Promotion (Exercise/Weight Loss), Diary/Personal Health Record	Health Promotion (Exercise/Weight Loss), Diary/Personal Health Record	Self-Management (Cancer), Self-Assessment, Symptom Checker, Therapy Management	Social Network	Health Promotion (Alcohol), Research Project, Information	Health Promotion (Alcohol), Research Project, Information	Health Promotion (Exercise/Weight Loss), Information	Health Promotion (Exercise/Weight Loss), Information	Health Promotion (Healthy Eating), Research Project, Information	Health Promotion (Healthy Eating), Research Project, Information	Information, Diary/Personal Health Record, Therapy Management	Information	Information	Self-Assessment, Symptom Checker (Depression)	Self-Management (LTC, Diabetes), Diary/Personal Health Record, Information	Self-Assessment, Risk Checker (LTC, Diabetes)	Self-Assessment, Risk Checker (LTC, Diabetes)	Self-Management (LTC, Diabetes), Diary/Personal Health Record	Self-Management (LTC, Diabetes), Diary/Personal Health Record	Information	Health Promotion (Alcohol), Diary/Personal Health Record	Health Promotion (Alcohol, Drugs), Research Project, Self-Assessment, Risk Checker (Alcohol)	Health Promotion (Alcohol, Drugs), Research Project, Self-Assessment, Risk Checker (Alcohol)	Information, Self-Management (LTC, Epilepsy)		Information, Health Promotion (Smoking, Alcohol, Drugs, Sexual Health), Service Directory	Information, Health Promotion (Smoking, Alcohol, Drugs, Sexual Health), Service Directory	Information, Service Directory	Social Network
Basic details
1.1						App name	Text	Write the name of the app as stated in the marketplace.	Aidsmap News	Antifungal Interactions	Antifungal Interactions	British Heart Foundation Recipe Finder	British Heart Foundation Recipe Finder	Brush DJ	Brush DJ	BSU Health	BSU Health	Calorie Counter +	Calorie Counter +	Cancer Emergency Response Tool – CERT	CarePair	Change4Life drinks tracker	Change4Life drinks tracker	Change4Life Fun Generator	Change4Life Fun Generator	Change4Life Healthier Recipes	Change4Life Healthier Recipes	Coronary Angiogram eSupport for patients	Dentify	Dentify	Depression Calculator	Diabetes Manager	Diabetes Risk Checker	Diabetes Risk Checker	Diabetes UK Tracker App	Diabetes UK Tracker App	Dr iSeb	DrinkCoach	Drinks Meter	Drinks Meter	Epilepsy Toolkit	eRedbook	Fairfield Park Health Centre	Fairfield Park Health Centre	Find NHS Services near you	Finerday	FolUp for Patient	FolUp for Patient	FoodWiz
1.1a						NHS Store URL	Text	Type the NHS App store URL	http://apps.nhs.uk/app/aidsmap-news/	http://apps.nhs.uk/app/antifungal-interactions/	http://apps.nhs.uk/app/antifungal-interactions/	http://apps.nhs.uk/app/british-heart-foundation-recipe-finder/	http://apps.nhs.uk/app/british-heart-foundation-recipe-finder/	http://apps.nhs.uk/app/brush-dj/	http://apps.nhs.uk/app/brush-dj/	http://apps.nhs.uk/app/bsu-health/	http://apps.nhs.uk/app/bsu-health/	http://apps.nhs.uk/app/calorie-counter/	http://apps.nhs.uk/app/calorie-counter/	http://apps.nhs.uk/app/cancer-emergency-response-tool-cert/	http://apps.nhs.uk/app/carepair/	http://apps.nhs.uk/app/change4life-drinks-tracker/	http://apps.nhs.uk/app/change4life-drinks-tracker/	http://apps.nhs.uk/app/change4life-fun-generator/	http://apps.nhs.uk/app/change4life-fun-generator/	http://apps.nhs.uk/app/change4life-healthier-recipes/	http://apps.nhs.uk/app/change4life-healthier-recipes/	http://apps.nhs.uk/app/coronary-angiogram-esupport-for-patients/	http://apps.nhs.uk/app/dentify/	http://apps.nhs.uk/app/dentify/	http://apps.nhs.uk/app/depression-calculator/	http://apps.nhs.uk/app/diabetes-manager/	http://apps.nhs.uk/app/diabetes-risk-checker/	http://apps.nhs.uk/app/diabetes-risk-checker/	http://apps.nhs.uk/app/diabetes-uk-tracker-app/	http://apps.nhs.uk/app/diabetes-uk-tracker-app/	http://apps.nhs.uk/app/dr-iseb/	http://apps.nhs.uk/app/drinkcoach/	http://apps.nhs.uk/app/drinks-meter/	http://apps.nhs.uk/app/drinks-meter/	http://apps.nhs.uk/app/epilepsy-toolkit/	http://apps.nhs.uk/app/eredbook/	http://apps.nhs.uk/app/fairfield-park-health-centre/	http://apps.nhs.uk/app/fairfield-park-health-centre/	http://apps.nhs.uk/app/find-nhs-services-near-you/	http://apps.nhs.uk/app/finerday/	http://apps.nhs.uk/app/folup-for-patient/	http://apps.nhs.uk/app/folup-for-patient/	http://apps.nhs.uk/app/foodwiz/
1.1b						App Store URL	Text	Type the store URL	https://itunes.apple.com/us/app/aidsmap-news/id498934825?mt=8	https://itunes.apple.com/gb/app/anti-fungal-interactions/id570555507?mt=8	https://play.google.com/store/apps/details?id=com.antifungalInteractions.android	https://itunes.apple.com/gb/app/british-heart-foundation-recipe/id377378641?mt=8	https://play.google.com/store/apps/details?id=com.precedent.bhf.android	https://itunes.apple.com/us/app/brush-dj/id475739913?mt=8	https://play.google.com/store/apps/details?id=uk.co.appware.brushdj	https://itunes.apple.com/gb/app/bsu-health/id529859985?mt=8	https://play.google.com/store/apps/details?id=com.mediloc8.bsuhealth2&feature=more_from_developer#?t=W251bGwsMSwxLDEwMiwiY29tLm1lZGlsb2M4LmJzdWhlYWx0aDIiXQ..	https://itunes.apple.com/gb/app/calorie-counter-+/id444924121?mt=8	https://play.google.com/store/apps/details?id=com.nutratech.app.android&hl=en	https://play.google.com/store/apps/details?id=com.neutropenicsepsis.CERT&feature=search_result#?t=W251bGwsMSwyLDEsImNvbS5uZXV0cm9wZW5pY3NlcHNpcy5DRVJUIl0.	https://itunes.apple.com/gb/app/carepair/id583839894?mt=8	https://itunes.apple.com/gb/app/change4life-drinks-tracker/id564295523?mt=8	https://play.google.com/store/apps/details?id=uk.nhs.drinkstracker	https://itunes.apple.com/gb/app/change4life-fun-generator/id526706782?mt=8	https://play.google.com/store/apps/details?id=uk.nhs.fungenerator	https://itunes.apple.com/gb/app/change4life-healthier-recipes/id583000807?mt=8	https://play.google.com/store/apps/details?id=uk.nhs.befoodsmart	https://itunes.apple.com/gb/app/coronary-angiogram-esupport/id584864743?mt=8	https://itunes.apple.com/gb/app/dentify/id577605472?mt=8	https://play.google.com/store/apps/details?id=com.dentify	https://itunes.apple.com/gb/app/depression-calculator/id517937129?mt=8	https://itunes.apple.com/us/app/diabetes-manager/id649331720?mt=8	https://itunes.apple.com/gb/app/diabetes-risk-checker/id553482953?mt=8	https://play.google.com/store/apps/details?id=com.clickinnovate.Diabetes	https://itunes.apple.com/gb/app/diabetes-uk-tracker/id455214278?mt=8	https://play.google.com/store/apps/details?id=com.zone.diabetesuk#?t=W251bGwsMSwxLDIxMiwiY29tLnpvbmUuZGlhYmV0ZXN1ayJd	https://itunes.apple.com/cy/app/dr.-iseb/id406154001?mt=8	https://itunes.apple.com/gb/app/drinkcoach/id593069344?mt=8	https://itunes.apple.com/us/app/drinks-meter/id568394934?mt=8	https://play.google.com/store/apps/details?id=com.drinksmeter.alcohol	https://itunes.apple.com/gb/app/epilepsy-tool-kit/id504820506?mt=8	https://itunes.apple.com/app/id606443658?mt=8	https://itunes.apple.com/gb/app/fairfield-park-health-centre/id587352429?mt=8	https://play.google.com/store/apps/details?id=com.mediloc8.fairfield.park&feature=more_from_developer#?t=W251bGwsMSwxLDEwMiwiY29tLm1lZGlsb2M4LmZhaXJmaWVsZC5wYXJrIl0.	https://play.google.com/store/apps/details?id=com.smartdroid.nhs	https://play.google.com/store/apps/details?id=com.project.finerday		https://play.google.com/store/apps/details?id=com.foluppatient	https://itunes.apple.com/gb/app/foodwiz/id400201840?mt=8
1.1c						Display name	Text	Type the dispay name that the app uses if it differs from the product name.	aidsmap news	Antifungal Interactions	Antifungal Interactions	The British Heart Foundation Recipe Finder	BHF Recipe Finder	Brush DJ	Brush DJ	BSUHealth	BSUHealth	Nutracheck	Nutracheck	Cancer Emergency Response Tool	CarePair	DrinksTracker	DrinksTracker	FunGenerator	FunGenerator	BeFoodSmart	BeFoodSmart	Coronary Angiogram	Dentify	Dentify	Depression	Diabetes	Diabetes	Diabetes Risk Checker	D Tracker	Diabetes UK Tracker	Dr iSeb	DrinkCoach	drinks meter	drinks meter	Epilepsy Tool Kit	eRedbook	Fairfield Park	Fairfield Park Health Centre	Find NHS Services	FinerDay	FolUp for Patient	Folup	FoodWiz
1.1d						Namespace	Text	Type the namespace of the app.	com.aidsmap.aidsmapnews	com.fungaltrust.antifungal	com.antifungalInteractions.android	co.uk.precedent.bhf	com.precedent.bhf.android	uk.co.toothbrushdj	uk.co.appware.brushdj	com.ncbath.BSUHealth	com.mediloc8.bsuhealth2	com.nutratech.nutracheck.app	com.nutratech.app.android	com.neutropenicsepsis.CERT	com.russellsmith.carepair	com.antbits.drinkstracker	uk.nhs.drinkstracker	com.antbits.fungenerator	uk.nhs.fungenerator	com.antbits.c4lrecipes	uk.nhs.befoodsmart	com.nortonbates.Angiogram	com.dentify.com	com.dentify	uk.co.patient.depressioncalc	uk.co.patient.diabetes	com.clickinnovate.Diabetes	com.clickinnovate.Diabetes	com.diabetesuk.diabetestrackingapp	com.zone.diabetesuk	com.iseb.appstore	uk.co.haga.drinkcoach	com.drinksmeter.alcohol	com.drinksmeter.alcohol	uk.co.mcmnet.epilepsytoolkit	com.sitekit.eRedBook	com.mediloc8.FairfieldPark	com.mediloc8.fairfield.park	com.smartdroid.nhs	com.project.finerday	*	com.foluppatient	co.foodwiz.FoodWiz
1.2						Version	Number	Write the version of the app as reported in the marketplace.	2.1	1.12	1.0	2.0	1.0	1.5	1.6	2.1	1.06	2.4.1	2.2.5	1.01	1.0	1.6	1.4	1.0	1.0	1.4	1.2	1.0.0	1.0	1.0	1.0	1.0	1.0	1.0	331	1.4	1.0	1.4	1.2	1.3	4.3	0.35	1.3	1.1	0.2	1.2	1.0	1.0	1.3
1.3b						Version release date	Date	Write the release date of the current version of the app as reported in the marketplace.	2012-03-01 01:29:44	2013-01-08 15:44:22	2013-01-27	2010-07-14 21:49:37	2011-05-06	2011-12-19 08:00:00	*	2012-06-13 22:40:57	*	2011-07-30 21:30:18	*	2012-12-20	2012-12-08 07:54:55	2012-10-02 05:45:20	2013-05-17	2012-05-28 08:00:00	2012-05-15	2013-01-07 08:00:00	*	2012-12-14 07:44:24	2012-12-30 00:39:09	2013-08-10	2012-04-19 00:16:44	2013-05-22 00:22:48	2013-02-16 18:39:21	2013-02-15	2011-09-01 22:24:40	2013-04-04	2010-12-03 07:53:48	2013-02-06 22:22:14	2012-10-25 20:11:56	*	2012-03-06 21:50:19	2013-02-27 22:54:13	2012-12-19 02:02:59	2013-02-28	*	2013-03-15	*	2013-07-19	2010-11-22 08:00:00
						Pricing
1.4a						Cost	£ or 'Free'	Write the cost of the app, in £, as reported in the marketplace at the time of download.	Free	2.99	2.99	Free	Free	Free	Free	Free	Free	Free	Free	Free	Free	Free	Free	Free	Free	Free	Free	2.99	0.99	0.69	Free	Free	0.99	0.69	Free	Free	Free	Free	Free	Free	Free	Free	Free	Free	Free	Free	Free	Free	Free
1.4b						Does the app offer paid-for enhancements?	Yes/No	Pick Yes if app functionality can be extended by paying for add-ons or additional services.	No	No	No	No	No	No	No	No	No	Yes	Yes	No	No	No	No	No	No	No	No	No	No	No	No	No	No	No	No	No	No	No	No	No	No		No	No	No	No
1.4c						If 1.4b YES, what is the nature of these enhacements?	Text	Summarise the add-ons that can be purchased for the app.										Cloud website access, nhanced food database, phone and email support, unlimited app features	Cloud website access, nhanced food database, phone and email support, unlimited app features
1.4d						If 1.4b YES, is the app functional without the enhancements?	Yes/No	Pick Yes if the app has substantive features even if enhancements are not purchased. Pick No if the app is just a container with no functions unless enhancements are purchased.										Yes	Yes
1.4e						If 1.4b YES, what is the cost of the necessary enhancements?	£	Type the cost, in £, of the paid enhancements.										£5.99/month	£5.99/month
						Origins
1.5						Publisher	Text	Write the name of the publisher of the app.	Thomas Paterson	Graham Atherton	STEALTH Apps	Precedent	British Heart Foundation	Benjamin Underwood	Benjamin Underwood	NC Bath Ltd	Mediloc8	NutraTech Ltd	NutraTech Ltd	Dorset Cancer Centre	Russell Smith	NHS Choices	Antbits Ltd.	NHS Choices	Antbits Ltd.	NHS Choices	Antbits Ltd.	Norton-Bates	Yatisha Patel	DentifyApp	Patient.co.uk	Patient.co.uk	Click Innovate Ltd	Click Innovate Ltd	Diabetes UK	Diabetes UK	Dr iSeb limited	Haringey Advisory Group on Alcohol (HAGA)	Global Drug Survey	drugs meter	MCM Net Limited	Sitekit Solutions Ltd	NC Bath Ltd	Mediloc8	Smart Droid	Mobilelite Ltd	Mobilelite Ltd	Pyramid-Consulting	Food Angels UK Ltd.
1.5a						Publisher ID	Number	Write the ID of the publisher.	498934828	570555750	STEALTH+Apps	377378644	British+Heart+Foundation	475739916	Benjamin+Underwood	529859988	Mediloc8	419867592	NutraTech+Ltd	Dorset+Cancer+Centre	583839897	334559444	Antbits+Ltd.	334559444	Antbits+Ltd.	334559444	Antbits+Ltd.	478329481	577605475	DentifyApp	492677473	492677473	545084415	Click+Innovate+Ltd	455214281	Diabetes+UK	406154004	593069347	568388556	drugs+meter	328323455	396345731	529859988	Mediloc8	Smart+Droid	Mobilelite+Ltd	Mobilelite+Ltd	Pyramid-Consulting	400201843
1.5c						Website hosting country	Text	Pick the country in which the publisher is based. Add countries to the list in List Sources as necessary.	United Kingdom	United Kingdom	United Kingdom	United Kingdom	United Kingdom	United Kingdom	United Kingdom	United States	United States	United Kingdom	United Kingdom	United Kingdom	United Kingdom	United States	United States	United States	United States	United States	United States	United Kingdom	Ireland	United Kingdom	United Kingdom	United Kingdom	Germany	Germany	United Kingdom	United Kingdom	United States	United States	United States	United States	United Kingdom	United Kingdom	United States	United States	Netherlands	United Kingdom	United Kingdom	France	Germany
1.5d						Publisher website	Link	Write (and verify) the web address of the publisher. Type an asterisk if not available.	http://www.aidsmap.com	http://www.aspergillus.org.uk/nac/interactions/support.php	http://www.aspergillus.org.uk/	http://www.precedent.co.uk	http://www.bhf.org.uk	http://www.brushdj.com	http://www.brushdj.com	http://www.mediloc8.com	http://www.mediloc8.com	http://www.nutracheck.co.uk/Info/iPhoneApp	http://www.nutracheck.co.uk	http://www.poole.nhs.uk/	http://www.carepair.co.uk	http://www.nhs.uk/Change4Life	http://www.nhs.uk/Change4Life/Pages/change-for-life.aspx	http://www.nhs.uk/Change4Life/Pages/fun-generator-mobile.aspx	http://www.nhs.uk/Change4Life/Pages/change-for-life.aspx	http://www.nhs.uk/Change4Life	http://www.nhs.uk/Change4Life/Pages/change-for-life.aspx	http://www.mysurgeryandme.com	https://www.facebook.com/dentify	*	http://www.patient.co.uk/feedback.asp	http://patient.co.uk/mobile.asp	http://www.diabetesriskchecker.com/	http://www.clickinnovate.com	http://www.diabetes.org.uk	http://www.diabetes.org.uk	http://hytechpro.com/	http://www.drinkcoach.org.uk/	http://drinksmeter.com/	http://globaldrugsurvey.com	http://www.mcmnet.co.uk/support/Epilepsy-guide-application.aspx	http://www.eredbook.org/contact	http://www.mediloc.com	http://www.mediloc8.com	http://smart-droid.com	http://www.finerday.com		http://www.pyramid-consulting.com	http://foodwiz.co
1.5e						Website accessible	Yes/No	Choose Yes if the website is accessible.	Yes	Yes	Yes	Yes	Yes	Yes	Yes	Yes	Yes	Yes	Yes	Yes	Yes	Yes	Yes	Yes	Yes	Yes	Yes	Yes	Yes	Yes	Yes	Yes	Yes	Yes	Yes	Yes	Yes	Yes	Yes	Yes	Yes	Yes	Yes	Yes	Yes	Yes	Yes	Yes	Yes
1.5h						Published email	Email Address	Type the publishers email address, if available.	*	*	admin@aspergillus.org.uk	*	internet@bhf.org.uk	*	info@brushdj.com	*	mccabeneil465@gmail.com	*	customercare@nutracheck.co.uk	rjo2004@gmail.com	*	*	thechoicesteam@nhschoices.nhs.uk	*	thechoicesteam@nhschoices.nhs.uk	*	thechoicesteam@nhschoices.nhs.uk	*	*	dentifytoothache@gmail.com	*	*	*	apps@clickinnovate.com	*	website@diabetes.org.uk	*		*	info@globaldrugsurvey.com	*	*	*	neil.mccabe@mediloc8.com	smartdroid2000@gmail.com	richard@afinerday.com		pycoasia@gmail.com	*
						Statistics
1.8a						Number of downloads	Number or Number Range	Write the download statistics as reported by the marketplace.	*	*	1 - 5	*	10,000 - 50,000	*	10,000 - 50,000	*	100 - 500	*	10,000 - 50,000	100 - 500	*	*	10,000 - 50,000	*	10,000 - 50,000	*	100,000 - 500,000	*	*	10 - 50	*	*	*	10 - 50	*	10,000 - 50,000	*	*	*	1,000 - 5,000	*	*	*	50 - 100	500 - 1,000	50 - 100	*	100 - 500	*
1.8b						Download count census date	Date	Write the date on which the download statistics were generated (if not stated by the marketplace, use the date of review)	*	*	2014-01-02	*	2014-01-02	*	2014-01-02	*	2014-01-02	*	2014-01-02	2014-01-02	*	*	2014-01-02	*	2014-01-02	*	2014-01-02	*	*	2014-01-02	*	*	*	2014-01-02	*	2014-01-02	*	*	*	2014-01-02	*	*	*	2014-01-02	2014-01-02	2014-01-02	*	2014-01-02	*
1.8c						User rating average	Number	Write the average user rating	*	*	0	3	2.9	4.5	3.9	5	5	4.5	3.7	0	*	3	3.3	3	3.3	4	4.3	*	5	5	4	*	*	5	3.5	3.4	*	*	*	3.7	*	*	*	0	5	0	*	5	2.5
1.8d						User rating count	Number	Write the number of user ratings used to calculate the average	*	*	0	126	74	41	94	9	1	44	82	0	*	13	41	9	57	464	573	*	6	2	6	*	*	1	6	41	*	*	*	7	*	*	*	0	2	0	*	1	38
1.8e						User rating census date	Date	Write the date on which the user ratings were collected up to (if not stated by the marketplace, use the date of review)	*	*	2014-01-02	2014-01-02	2014-01-02	2014-01-02	2014-01-02	2014-01-02	2014-01-02	2014-01-02	2014-01-02	2014-01-02	*	2014-01-02	2014-01-02	2014-01-02	2014-01-02	2014-01-02	2014-01-02	*	2014-01-02	2014-01-02	2014-01-02	*	*	2014-01-02	2014-01-02	2014-01-02	*	*	*	2014-01-02	*	*	*	2014-01-02	2014-01-02	2014-01-02	*	2014-01-02	2014-01-02
1.8f						Content rating	Text	Write the content rating assigned to the app.	12+	4+	Everyone	4+	Everyone	4+	Low Maturity	12+	Low Maturity	*	Everyone	Everyone	4+	*	High Maturity	*	Everyone	*	Everyone	4+	4+	Medium Maturity	4+	4+	4+	Everyone	4+	Everyone	4+	*	17+	High Maturity	4+	4+	4+	Low Maturity	Low Maturity	Everyone	*	Medium Maturity	4+
Functionality
2.0a						App description	Text	Copy and pase the app description presented by the publisher.	Keep up to date with latest news about HIV and AIDS.\n\nDaily reports on new research, findings and controversies in HIV treatment and prevention from around the world. We also cover key developments in tuberculosis and hepatitis.\n\nThis app comes from NAM, the producers of www.aidsmap.com. We provide more original, daily news reports on new developments in HIV and AIDS than anyone else.\n\nNAM\…	Antifungal medications can cause problems if you are taking other medications. Would you like to be prepared?\n\nAntifungal Interactions allows you to choose whatever med you are taking and check it against several antifungals: itraconazole, voriconazole, posaconazole, caspofungin, amphotericin, ambisome, fluconazole and micafungin.\nThe APP will tell you if there is an interaction, it will tell …	Antifungal medications can cause problems if you are taking other medications. Would you like to be prepared? Antifungal Interactions allows you to choose whatever med you are taking and check it against several antifungals: itraconazole, voriconazole, posaconazole, caspofungin, amphotericin, ambisome, fluconazole and micafungin. The APP will tell you if there is an interaction, it will tell you …	Our app offers you a growing selection of Heart healthy recipes all checked by our BHF dieticians. Learn how to make tasty and varied meals suitable for anyone who wants to eat healthily. If you have high blood pressure, diabetes or are trying to reduce your cholesterol, there\u2019s a range of delicious recipes just for you.\n \nOur recipe finder offers:\n\u2022 Nutritional values with easy to u…	Our app offers you a growing selection of Heart healthy recipes all checked by our BHF dieticians. Learn how to make tasty and varied meals suitable for anyone who wants to eat healthily. If you have high blood pressure, diabetes or are trying to reduce your cholesterol, there’s a range of delicious recipes just for you. Our recipe finder offers: • Nutritional values with easy to understand traff…	Brush DJ makes brushing your teeth fun and effective!\n\nThis award winning free app, with no adverts, plays 2 minutes of music taken at random from your devices music library and has a visual display showing where to brush- finally brushing becomes something to enjoy!\n\nBrush DJ has been developed by a dentist for anyone wanting to help prevent gum disease and tooth decay to maintain a healthy …	This free award-winning app, with no adverts, plays 2 minutes of music taken at random from your devices music library- finally brushing becomes something to enjoy! Brush DJ has been developed by a dentist for anyone wanting to help prevent gum disease and tooth decay, to maintain a healthy smile and fresh breath. Also, by using this app you will rediscover your music collection- from guilty plea…	Welcome to BSU Health, an app designed to provide Bath Spa University students with key health information so that you can quickly access the most appropriate healthcare for your specific needs. Whether it is access to emergency care, maps of local health facilities, concerns about an illness, or your ability to cope at university, BSU Health puts the right advice at your fingertips.\n \nBSU Heal…	Welcome to BSU Health, an app designed to provide Bath Spa University students with key health information so that you can quickly access the most appropriate healthcare for your specific needs. Whether it is access to emergency care, maps of local health facilities, concerns about an illness, or your ability to cope at university, BSU Health puts the right advice at your fingertips. BSU Health h…	UK Calorie Counter App - part of Nutracheck.co.uk online weight loss. Enjoy a 5 day free trial \u2013 after this daily usage limits apply. Upgrade to full App access from £3.99 / month. For the full Nutracheck.co.uk service, including extra online tools, subscriptions start from £8.99 / month.\n***** Reviewed by the Daily Mail *****\n\	Lose weight with Nutracheck's Calorie Counter & Food Diary App. It's the perfect diet companion, designed to make keeping a food diary quicker, easier and more convenient. Unlike some calorie counters, ours contains only UK foods, weights and measures saving time and effort. Use the App standalone, or with the Nutracheck.co.uk website - online members simply sign in with their email and password.…	The Cancer Emergency Response Tool (CERT) allows cancer patients to rapidly and effectively manage chemotherapy toxicity and disease-related problems which may require urgent hospital assessment. CERT covers 7 of the most serious medical complications and toxicities encountered by cancer patients. It assists appropriate decision making about when to seek medical advice, and speeds direct access t…	The CarePair app is designed to run alongside the CarePair website. It enables existing CarePair users to log in and utilise the CarePair System from their iDevices. \nUsers can post jobs or look for jobs using the CarePair app, and are able to contact each other through the messaging system, phone call or text message.\nPlease note you are not able to access the CarePair app functionality withou…	The Change4Life drinks tracker app is a great, free way to keep an eye on your drinking.\n\nMany of us like to unwind with a nice glass of something. But it\u2019s funny how drink sneaks up on us. The odd glass in the evening can quickly become two or three regular glasses, most evenings.\n\nThe Change4Life app helps you keep track of your drinking - showing you when you\u2019re putting your heal…	Download the drinks tracker app today and use it to: • Track your drinks each day • Use the graph view to spot when you’re overdoing it • Learn more about the risks • Get daily tips and feedback • Add daily notes • Share with friends via Facebook or Twitter	The Change4Life fun generator app is packed with over 100 fun activities for your kids to enjoy, indoors and out. There\u2019s something for everyone - outdoor games for big groups such as dodgeball or tug of war, and indoor activities like ice lolly making and homemade instruments. So start exploring \u2013 and enjoy your adventures! \n\n\u2022Start by choosing where your kids are playing \u2013…	There’s something for everyone - outdoor games for big groups such as dodgeball or tug of war, and indoor activities like ice lolly making and homemade instruments. So start exploring – and enjoy your adventures! • Start by choosing where your kids are playing – indoors or outdoors • Use the slider to select how many kids are joining in • Browse the suggested activities – each with full instructi…	The Change4Life Smart Recipes app is a great, free way of helping everybody eat tasty, healthier meals. \n\nSometimes it\u2019s hard to know what to cook or have new meal ideas. And remembering ingredients and keeping track of calories can be a hassle. Don\u2019t worry \u2013 the meal mixer takes care of it!\nDownload the app today and use it to:\n\n\u2022 Search over 100 easy, calorie counted re…	The Change4Life Smart Recipes app is a great, free way of helping everybody eat tasty, healthier meals. Sometimes it’s hard to know what to cook or have new meal ideas. And remembering ingredients and keeping track of calories can be a hassle. Don’t worry – the meal mixer takes care of it! Download the app today and use it to: -Search over 100 easy, calorie counted recipes for breakfast, lunch, e…	Have you, a friend or family member been experiencing possible heart problems and been advised to have a coronary angiogram (cardiac catheter)? Do you want to know more about a coronary angiogram and why you might need it? If yes, then this is the App for you.\n\nCoronary Angiogram eSupport is a comprehensive patient support App written by an experienced consultant cardiologist giving an overview…	iDentify & manage your toothache;temporary advice before you can see a dentist!\n\nAre you having trouble managing toothache? Dentify has been designed to help you deal with dental problems and offer you some temporary advice before you can get to a dentist.\n\nDentify describes signs and symptoms that your dentist would normally look for, to try and find the cause of your problem- and then offer…	Are you having trouble managing toothache? Dentify has been designed to help you deal with dental problems and offer you some temporary advice before you can get to a dentist. Dentify describes signs and symptoms that your dentist would normally look for, to try and find the cause of your problem- and then offers you advice on what you can do next. The information provided in the application has …	Use this app to assess whether you may be depressed and make a tentative diagnosis of the severity of the depression.\n\nThis app is based on the PHQ-9 screener, a diagnostic tool specific to depression used by health care professionals that is quick and easy for patients to complete.\n\nThe app also provides useful information on depression and antidepressants taken from Patient.co.uk. Each info…	Diabetes Manager from Patient.co.uk allows you to track your essential diabetes data and tailors the app to you, whether you have type 1 or type 2 diabetes.\n\nRecord your blood glucose, blood pressure, bolus and basal insulin doses, diet, activity levels, weight and more!\n\nSet your hypo and hyper limits and see what's affecting them.\n\nEssential data indicators are easily viewable on the home…	Easily estimate the risk of developing Type 2 Diabetes over the next 10 years by answering some simple questions within the app.\n\nThe calculation is based on the open source ClinRisk QDiabetes algorithm. The algorithm has been developed by doctors and academics working in the UK National Health Service (NHS) and is based on data from thousands of GPs.\n\nNote: The data collected by this app is …	Easily estimate the risk of developing Type 2 Diabetes over the next 10 years by answering some simple questions within the app. The calculation is based on the open source ClinRisk QDiabetes algorithm. The algorithm has been developed by doctors and academics working in the UK National Health Service (NHS) and is based on data from thousands of GPs. Note: The data collected by this app is used o…	This official Diabetes UK app, Diabetes UK Tracker, is designed to be quick and simple to use, taking the chore out of logging your daily levels to help you effectively manage your diabetes.\n\nDesigned by a team that included user experience professionals, clinical specialists and the real experts \u2013 people with diabetes. \n\nUNIQUE FEATURES:\n\n★ Track how you're feeling, and see how this a…	The official Diabetes UK app, the Diabetes UK Tracker, is designed to be quick and simple to use, taking the chore out of logging your daily levels to help you effectively manage your diabetes. The app was designed by a team that included user experience professionals, clinical specialists, and the real experts – people with diabetes. * Requires Android version 2.3 (Gingerbread) or higher * Log b…	NULL	NULL	Drinks Meter offers anonymous, objective feedback on your alcohol use and comparison to thousands of people\u2019s drinking habits worldwide.\n\nIt\u2019s not just about the drinks \u2014 it\u2019s about who you are, how you drink and the impact it has on your life.\n\nSo, if you want to see what your drinking equates to in cheeseburgers, your score on a medical alcohol screener or just how it al…	Drinks Meter offers anonymous, objective feedback on your alcohol use and comparison to thousands of people’s drinking habits worldwide. It’s not just about the drinks — it’s about who you are, how you drink and the impact it has on your life. So, if you want to see what your drinking equates to in cheeseburgers, your score on a medical alcohol screener or just how it all adds up, Drinks Meter sh…	The National Society for Epilepsy app provides clear and concise information for dealing with epilepsy.\n\nThere are many useful features including a medication reminder, seizure diary and a medication list.\n\nAdd medication reminders that will trigger an alarm on your phone when it is time to take medication.	The eRedbook mobile application is a version of the UK national standard Redbook;the Redbook is also known as the Personal Child Health Record (ePCHR). The eRedbook allows a child\u2019s parents or guardians to maintain a mobile online record of their child\u2019s health, from birth to five years of age and links in with eRedbook online.	Welcome to the app for Fairfield Park Health Centre, where you can access information on our services, order repeat prescriptions online, and contact us.	Welcome to the app for Fairfield Park Health Centre, where you can access information on our services, order repeat prescriptions online, and contact us.	This is a must have app for finding urgent NHS A&E contacts while out and about in UK. This app helps user find addresses and contact numbers of NHS services near them. User can use filters to narrow down searches. In addition to urgent care services like A&E or pharmacy, or you user will also be able to find other services like GP or dentist. It uses GPS location of the Android to locate user an…	FinerDay is the mobile app for the free, safe, multi-award winning social networking website – www.finerday.com FinerDay is a ‘closed’ secure social network for all ages, even for those who are less technically aware. The App offers secure messaging, shares photos and special dates, stores favourite web links and contains a portal which will shortly offer personalised healthcare information and t…	FinerDay is the mobile app for the free, safe, multi-award winning social networking website – www.finerday.com FinerDay is a ‘closed’ secure social network for all ages, even for those who are less technically aware. The App offers secure messaging, shares photos and special dates, stores favourite web links and contains a portal which will shortly offer personalised healthcare information and t…	Please note this version of the patient mobile app is a Beta version for basic tracking updates. We are currently working on new a iteration and in the next couple of weeks we will release further functionality. For a full use experience please visit our website: https://www.folup.com FolUp is a novel technology for patients that packages feedback and experiences into useful medical information f…	Use FoodWiz in the Supermarket or at home to read Product barcodes, and find out if products match your lifestyle. FoodWiz improves your shopping experience by quickly displaying what you want to know about products. Simply point the camera on the iPhone at a Product barcode, and the FoodWiz App will instantly display information on the lifestyle choices selected.\n\nUse the FoodWiz App to avoid …
2.0b						Release notes	Text	Copy and paste the version release notes presented by the publisher.	Version 2.1;Version 2.1 fixes a number of bugs identified by users.	Version 1.12;New Database	*	Version 2;New App name	*	Version 1.5;* Personalise your Brush DJ with three brand new special edition themes. * You can now tell Brush DJ to choose songs from one of your playlists, or create one especially for Brush DJ. *When updating from version 1.4 please update all your reminders *You need at least 10 songs on your device for Brush DJ to work!	Thank you for all the great feedback on how Brush DJ can be improved:) We have now * added short videos showing how to carry out basic oral hygiene tasks * shortened the information menu * made giving feedback on how this version can be improved easier We hope you enjoy this update and look forward to your feedback:)	Version 2.5;iOS 7 version, and new CBT site	List of Common Conditions in "Not Sure", linking to NHS advice on each condition.	Version 3.1.2;- Fixed an issue with the Kcal Badge not appearing for some iPhone users If your badge has disappeared, download the App update, then go to the More section, scroll down the page and choose 'Show kcal badge	#NAME?	*	Version 1.1;The CarePair app has been upgraded and now features - iOS 7 compatibility. - Push notification functionality	Version 1.6;Content update	Fixed startup issues	Version 1.1;content update and bug fixes	*	Version 2.0.2;• Updated recipe content • Improvements to search	Fix to 'clear shopping list' bug	*	*	*	Version 1.1;Various updates	Version 1.2;Various bug fixes	*	*	Version 1.8;- Fixed bug in Week View	*	*	*	Version 2.0.1;Minor bug fixes	• Minor bug fixes • Data visualisations • Weekly spend in terms of units and standard sized drinks • Comparison to thousands of other people • Comparison to national alcohol guidelines • Calorie and food alcohol consumption equivalents • Adjustment of unit intake based on personal and medical history • Potential health, alcoholic unit, calorie and financial savings if potentially unnecessary drin…	Version 1.0.1;Minor change to the interface	*	Version 1.3;minor mods - show activity indicator when loading	Inclusion of new 111 number for out of hours calls	v1.0 - Better user menus - Contacts can be saved locally on droid v0.2 - GP, Dentist, Hospital added	*	*	Minor bugs fixing	Version 1.3;In Version 1.3, we have made minor improvements to the sync with website option
						Help																																Yes
2.5a						Does the app offer a local help system?	Yes/No	Pick Yes if the app offers a startup guide, wizard, help screen or FAQs list inside the product.	Yes	Yes	Yes	No	No	No	No	No	No	Yes	No	Yes	No	Yes	Yes	Yes	Yes	Yes	Yes	No	Yes	Yes	Yes	No	Yes	Yes	No	No	Yes	No	No	No	Yes		No	No	No	No
2.5b						Does the app offer online help system?	Yes/No	Pick Yes if there is online help, tutorials or videos available on the web.	No	No	No	No	No	Yes	Yes	No	No	Yes	Yes	No	Yes	No	No	Yes	Yes	Yes	Yes	No	No	No	No	No	No	No	Yes	Yes	No	No	No	No	No		No	No	No	No
2.6a						Is there a support contact?	Yes/No	Pick Yes if a support contact email or feedback form is available either through the app or on the web.	Yes (In App Form)	Yes (Marketplace)	Yes (Marketplace)	Yes (In App Email)	Yes (In App Email)	Yes (Website)	Yes (Website)	Yes (In App Email)	Yes (Marketplace)	Yes (In App Email)	Yes (In App Email)	Yes (Marketplace)	Yes (Marketplace)	Yes (Marketplace)	Yes (Website)	Yes (Marketplace)	Yes (Website)	Yes (Marketplace)	Yes (Marketplace)	Yes (In App Email)	Yes (Marketplace)	Yes (Marketplace)	Yes (Marketplace)	Yes (Marketplace)	Yes (Website)	Yes (Website)	Yes (In App Email)	Yes (In App Email)	Yes (In App Email)	Yes (Website)	Yes (Website)	Yes (Website)	Yes (Website)		Yes (Marketplace)	Yes (Marketplace)	Yes (Marketplace)	Yes (Marketplace)
2.6b						If 2.6a YES, what is the support website link?	Link	Pick from list.	http://www.aidsmap.com	http://www.aspergillus.org.uk/nac/interactions/support.php	http://www.aspergillus.org.uk	*	*	http://www.brushdj.com	http://www.brushdj.com	*	*	*	http://www.nutracheck.co.uk/popups/privacypolicy.html	*	http://www.carepair.co.uk	http://www.nhs.uk/aboutNHSChoices/Pages/ContactUs.aspx	http://www.nhs.uk/Change4Life/Pages/sneaky-drinks.aspx	http://www.nhs.uk/aboutNHSChoices/Pages/ContactUs.aspx	http://www.nhs.uk/Change4Life/Pages/change-for-life.aspx	http://www.nhs.uk/aboutNHSChoices/Pages/ContactUs.aspx	http://www.nhs.uk/Change4Life/Pages/change-for-life.aspx	http://www.mysurgeryandme.com	https://www.facebook.com/dentify	*	http://www.patient.co.uk/feedback.asp	http://www.patient.co.uk/feedback.asp	http://www.clickinnovate.com	http://www.clickinnovate.com	http://www.diabetes.org.uk	http://www.diabetes.org.uk	*	http://www.orbismedia.co.uk, http://www.haga.co.uk	http://www.drinksmeter.com	http://www.drinksmeter.com	http://www.epilepsysociety.co.uk	*	http://www.mediloc.com/	*	http://smart-droid.com	www.finerday.com	*	https://www.folup.com/PatientTerm	*
2.6c						If 2.6a YES, is there a support email?	Email Address	Record email address for obtaining support	into@nam.org.uk	admin@aspergillus.org.uk	admin@aspergillus.org.uk	internet@bhf.org.uk	internet@bhf.org.uk	info@brushdj.com	info@brushdj.com	mccabeneil465@gmail.com	mccabeneil465@gmail.com	customercare@nutracheck.co.uk	customercare@nutracheck.co.uk	rjo2004@gmail.com	*	*	thechoicesteam@nhschoices.nhs.uk	*	thechoicesteam@nhschoices.nhs.uk	*	thechoicesteam@nhschoices.nhs.uk	mysurgeryandme@gmail.com	*	dentifytoothache@gmail.com	*	*	apps@clickinnovate.com	apps@clickinnovate.com	website@diabetes.org.uk	website@diabetes.org.uk	sebastiankalwij@gmail.com	hello@haga.co.uk	*	info@globaldrugsurvey.com	*	*	*	neil.mccabe@mediloc8.com	smartdroid2000@gmail.com	richard@afinerday.com	*	pycoasia@gmail.com	*
2.6e						Notes	Text	Record any other details about help or support.	Telephone support contact 020 3242 0820.	Support website includes link to admin@aspergillus.org.uk	*	*	*	Dedicated website provides more guidance. App links to DoH document on Delivering Better Oral Health.	Link to YouTube video shown on startup and dedicated website provides more guidance. App links to DoH document on Delivering Better Oral Health.	Contact phone number of Info page 07795 554 715	*	Popover help introduces how to use new features on each tab. Email from More > About / Contact Us	Email from More > About / Contact Us	*	Twitter account @carepair_uk	*	*	*	Feedback invited via Facebook page.	*	*	*		*			Email address on website.	Email address on website.	*	*		Email address from website.		Email address from Marketplace listing.	App includes telephone number 01494 601 300 and postal address. Brief help in Managing Epilepsy section.			*	*	*
Permissions
3.1b						Connect to Network	Pick from list	Pick the item depending on whether the app has permission to do this, and whether it implements the functionality, either overtly or covertly.	Yes (Internet)	*	*	Yes (Internet)	Yes (Internet)	Yes (Internet)	Yes (Internet)	Yes (Internet)	Yes (Internet)	Yes (Internet)	Yes (Internet)	Yes (Internet)	Yes (Internet)	Yes (Internet)	Yes (Internet)	Yes (Internet)	*	Yes (Internet)	Yes (Internet)	Yes (Internet, TCP)	Yes (Internet)	Yes (Internet)	Yes (Internet)	Yes (Internet)	Yes (Internet)	Yes (Internet)	Yes (Internet)	Yes (Internet)	*	Yes (Internet)	Yes (Internet, TCP, UDP)	Yes (Internet)	Yes (Internet)	Yes (Internet, TCP)	Yes (Internet)	Yes (Internet)	Yes (Internet)	Yes (Internet)	*	Yes (Internet)	Yes (Internet)
3.1c						Connect to Service	Pick from list	Pick the item depending on whether the app has permission to do this, and whether it implements the functionality, either overtly or covertly.	*	*	*	*	*	*	*	*	*	*	*	*	*	Yes (Twitter)	*	*	*	Yes (Twitter)	*	*	Yes (Twitter)	*	*	*	*	*	Yes (Twitter)	*	*	*	Yes (Facebook, Twitter)	*	*	*	*	*	*	*	*	*	*
3.1d						Connect to External Device	Pick from list	Pick the item depending on whether the app has permission to do this, and whether it implements the functionality, either overtly or covertly.	*	*	*	*	*	*	*	*	*	*	*	*	*	*	*	*	*	*	*	*	*	*	*	*	*	*	*	*	*	*	*	*	*	*	*	*	*	*	*	*	*
3.1e						Access Sensor	Pick from list	Pick the item depending on whether the app has permission to do this, and whether it implements the functionality, either overtly or covertly.	*	*	*	Yes (Accelerometer)	*	Yes (Accelerometer, Camera, Location, Microphone)	Yes (Location)	Yes (Location)	Yes (Location)	Yes (Accelerometer, Camera, Camera, Microphone, Location)	Yes (Camera)	*	Yes (Location)	Yes (Accelerometer, Camera, Location, Microphone)	*	*	*	Yes (Accelerometer, Camera, Location, Microphone)	*	Yes (Camera)	Yes (Camera, Location)	Yes (Location)	Yes (Camera, Camera, Microphone, Gyroscope, Accelerometer)	*	Yes (Accelerometer, Camera, Location, Microphone)	*	Yes (Camera)	*	Yes (Location)	*	Yes (Camera, Gyroscope, Accelerometer, Location, Microphone)	*	Yes (Camera)	Yes (Camera)	*	Yes (Location)	Yes (Location)	*	*	*	Yes (Camera, Microphone, Location)
3.1f						Vibrate	Pick from list	Pick the item depending on whether the app has permission to do this, and whether it implements the functionality, either overtly or covertly.	*	*	*	Yes	Yes	Yes	Yes	*	*	Yes	*	Yes	*	Yes	*	*	*	Yes	*	*	*	*	Yes	Yes	Yes	*	*	*	*	*	Yes	*	*	*	*	*	*	*	*	*	Yes
3.1g						Call Phone	Pick from list	Pick the item depending on whether the app has permission to do this, and whether it implements the functionality, either overtly or covertly.	*	*	*	*	*	*	*	*	Yes	*	*	Yes	*	*	*	*	*	*	*	*	*	*	*	*	*	*	*	Yes	*	*	*	*	*	*	*	Yes	*	*	*	*	*
3.1h						Get Device Information	Pick from list	Pick the item depending on whether the app has permission to do this, and whether it implements the functionality, either overtly or covertly.	Yes (Network State)	*	*	*	Yes (Network State, Phone State)	Yes (Network State)	Yes (Network State, Phone State)	*	Yes (Network State)	Yes (Kernel, Network State)	Yes (Network State)	Yes (Network State)	Yes (Network State)	Yes (Kernel, Network State)	Yes (Network State)	*	*	Yes (Kernel, Network State)	Yes (Network State)	Yes (Kernel)	Yes (Network State)	Yes (Network State, Phone State)	Yes (Kernel, Network State)	Yes (Kernel, Network State)	Yes (Kernel, Network State)	Yes (Network State)	Yes (Kernel, Network State)	*	*	*	Yes (Kernel, Network State)	Yes (Network State)	*	Yes (Kernel, Network State)	*	*	Yes (Network State)	Yes (Network State)	*	Yes (Network State)	*
3.1i						Modify Device State	Pick from list	Pick the item depending on whether the app has permission to do this, and whether it implements the functionality, either overtly or covertly.	*	*	*	*	*	*	*	*	*	*	Yes (Network, Settings)	*	*	*	*	*	*	*	*	*	*	*	*	*	*	*	*	*	*	*	*	*	*	*	*	*	*	*	*	*	*
3.1j						Access User Data	Pick from list	Pick the item depending on whether the app has permission to do this, and whether it implements the functionality, either overtly or covertly.	Yes (Files)	Yes (Files)	*	*	*	Yes (Contacts, Files, Photos, Video, Pictures)	Yes (Accounts)	Yes (Files)	*	Yes (Files, Pictures)	*	*	*	Yes (Contacts, Files, Photos, Video, Pictures)	*	*	*	Yes (Contacts, Files, Photos, Video, Pictures)	*	Yes (Calendar, Files, Pictures)	Yes (Calendar, Files, Pictures)	*	Yes (Calendar, Contacts, Files, Pictures)	Yes (Files)	Yes (Contacts, Files, Photos, Video, Pictures)	*	Yes (Calendar, Files, Photos, Video, Pictures)	*	Yes (Files)	Yes (Files)	Yes (Files, Photos, Video, Pictures)	*	Yes (Files, Pictures)	Yes (Files, Pictures)	*	*	*	*	*	*	Yes (Files)
3.1k						Store Data	Pick from list	Pick the item depending on whether the app has permission to do this, and whether it implements the functionality, either overtly or covertly.	Yes (Database)	Yes (Database)	Yes (Files)	Yes (SMS/Email)	*	Yes (Contacts)	Yes (Files)	Yes (SMS/Email)	Yes (Files)	Yes (Database, SMS/Email)	Yes (Files)	*	Yes (SMS/Email)	Yes (Contacts, SMS/Email)	*	Yes (SMS/Email)	*	Yes (Contacts, SMS/Email)	*	*	Yes (SMS/Email)	Yes (Files)	Yes (Contacts, SMS/Email)	Yes (SMS/Email)	Yes (Contacts, SMS/Email)	*	Yes (SMS/Email)	Yes (Files)	Yes (Database, SMS/Email)	*	Yes (Database, SMS/Email)	*	Yes (Database)	Yes (SMS/Email)	*	*	Yes (Files)	Yes (Files)	*	*	Yes (Database)
3.1l						Push Notification	Pick from list	Pick the item depending on whether the app has permission to do this, and whether it implements the functionality, either overtly or covertly.	*	*	*	*	*	*	Yes	*	*	*	*	*	*	*	*	*	*	Yes	*	*	*	*	*	Yes	*	*	Yes	*	*	Yes	Yes	*	Yes	*	*	*	*	*	*	*	*
3.1m						Display Advert	Pick from list	Pick the item depending on whether the app has permission to do this, and whether it implements the functionality, either overtly or covertly.	*	*	*	*	*	*	*	*	*	Yes (Admob, iAd)	*	*	*	*	*	*	*	*	*	*	Yes (iAd)	*	*	*	*	*	*	*	*	*	Yes (iAd)	*	*	*	*	*	*	*	*	*	*
3.1n						Track User	Pick from list	Pick the item depending on whether the app has permission to do this, and whether it implements the functionality, either overtly or covertly.	*	*	*	*	*	*	*	*	*	Yes (Google Analytics)	*	*	*	*	*	*	*	*	*	*	*	*	*	*	*	*	*	*	*	*	*	*	*	*	*	*	*	*	*	*	*
3.1o						In App Purchasing	Pick from list	Pick the item depending on whether the app has permission to do this, and whether it implements the functionality, either overtly or covertly.	*	*	*	*	*	Yes	*	Yes	*	Yes	Yes	*	*	*	*	*	*	*	*	*	Yes	*	*	*	*	*	*	*	*	*	Yes	*	*	*	*	*	*	*	*	*	*
Policies
						In-app privacy policy
4.1a						Does the app include or link to a privacy policy or confidentiality policy?	Pick from list	Pick Yes if a privacy policy is available from the app.	No	No	No	No	No	No	No	No	No	No	No	No	Yes (Privacy Policy)	Yes (Privacy Policy)	Yes (Privacy Policy)	Yes (Privacy Policy)	Yes (Privacy Policy)	Yes (Text)	Yes (Text)	No	No	No	Yes (Web Link)	Yes (Web Link)	Yes (Text)	Yes (Text)	Yes (Text)	Yes (Text)	No	No	Yes	Yes	No	0	No	No	No	Yes (T&C)	0	Yes (Web Link)	0
						If 4.1a YES…
4.1b						If 4.1a YES, what is the URL for the policy?	Link	If the policy is incorporated into the app, enter an asterisk													*	*	*	*	*	*	*				http://www.patient.co.uk/disclaimer.asp	http://www.patient.co.uk/disclaimer.asp	*	*	*	*										*
4.1c						If 4.1a YES, does the URL work?	Yes/No	Pick Yes if the URL works correctly, otherwise No.													*	*	*	*	*	*	*				Yes	Yes	*	*	*	*										*
4.1i						Notes	Text		*	*	Links to web copyright notice. Privacy policy in app store doesn’t direct to privacy policy.	*	No privacy policy link in app store.	Has T&C but make no mention of privacy.	Has T&C but make no mention of privacy. Privacy policy link in app store doesn't direct to privacy policy.	*	No privacy policy link in app store.	*	Privacy policy link in app store.	No privacy policy link in app store.	Privacy policy displayed on startup.	Menu > Settings > Privacy Policy	Menu > Settings. No privacy policy link in app store.	Privacy Policy link displayed when starting app for first time only.	Privacy Policy link displayed when starting app for first time only. No privacy policy link in app store.	Know the facts > About Change4Life > About the app. Integrated into other text.	Know the facts > About Change4Life > About the app. Integrated into other text. No privacy policy link in app store.	*	*	No privacy policy link in app store.	About tab > Disclaimer includes link "http://www.patient.co.uk/disclaimer.asp" that redirects to terms and conditions which includes privacy policy. When opening disclaimer asked for current location.	Information > Disclaimer includes link "http://www.patient.co.uk/disclaimer.asp" that redirects to terms and conditions which includes privacy policy. When opening disclaimer asked for current location.	Important Information Button.	Important Information Button. No privacy policy link in app store.	About Tab. Describes analytics package.	About Tab. No privacy policy link in app store.	*	*	"Drinks meter is anonymous and confidential and dose not collect any pesronal information that could identify you." on start screen. Disclaimer.html found in app bundle but link does not work on start screen.	"It's all anonymous and confidential" on ID page. Privacy policy in app store doesn't direct to privacy policy.	*	*	*	Web app loads in hosted browser. No privacy policy link in app store.	Privacy policy in app store doesn't direct to privacy policy.	T&C displayed only on new user registration. App crashes when trying to access.	*	Sign Up > Terms and Conditions. Privacy policy link in app store.	*
						Other privacy policies
4.2a						Does the app storeinclude a privacy policy link?	Yes/No	Pick Yes if app store includes privacy policy link,.	No	No	Yes (Broken)	No	No	No	Yes (Broken)	No	No	No	Yes	No	No	No	No	No	No	No	No	No	No	No	No	No	No	No	No	No	No	No	No	Yes (Broken)	No	*	No	No	Yes (Broken)	Yes	*	*	*
4.2b						Does the supplier website include a privacy policy?	Pick from list	Pick Yes if a privacy policy is available online but only if it is different from any listed/linked in the app.	Yes	Yes	Yes	Yes	Yes	Yes	Yes	No	No	Yes	Yes	Yes	Yes	Yes	Yes	Yes	Yes	Yes	Yes	No	No	No	Yes	Yes	No	No	Yes	Yes	No	No	No	No	No	Yes	No	No	Yes	Yes	Yes	Yes	No
						If 4.2b YES…
4.2c						If 4.2b YES, what is the URL for the policy?	Link	Type the URL of the policy.	http://www.aidsmap.com/Privacy-amp-cookies/page/1404311/	http://www.aspergillus.org.uk/Policies/confidentiality_privacy.php	http://www.aspergillus.org.uk/Policies/confidentiality_privacy.php	http://www.bhf.org.uk/privacy-statement.aspx?sc_id=FrontNAV-Footer-Privacy%20Policy&utm_source=FrontNAV-Footer-Privacy%20Policy&utm_medium=FrontNAV-Footer-Privacy%20Policy&utm_campaign=FrontNAV-Footer-Privacy%20Policy	http://www.bhf.org.uk/privacy-statement.aspx?sc_id=FrontNAV-Footer-Privacy%20Policy&utm_source=FrontNAV-Footer-Privacy%20Policy&utm_medium=FrontNAV-Footer-Privacy%20Policy&utm_campaign=FrontNAV-Footer-Privacy%20Policy	http://www.brushdj.com/#nogo	http://www.brushdj.com/#nogo			http://www.nutracheck.co.uk/popups/privacypolicy.html	http://www.nutracheck.co.uk/popups/privacypolicy.html	https://www.poole.nhs.uk/footer-pages/terms-and-conditions.aspx	https://www.carepair.co.uk/index.php/home/privacy	http://www.nhs.uk/Change4Life/Pages/privacy-policy.aspx	http://www.nhs.uk/Change4Life/Pages/privacy-policy.aspx	http://www.nhs.uk/Change4Life/Pages/privacy-policy.aspx	http://www.nhs.uk/Change4Life/Pages/privacy-policy.aspx	http://www.nhs.uk/Change4Life/Pages/privacy-policy.aspx	http://www.nhs.uk/Change4Life/Pages/privacy-policy.aspx				http://www.patient.co.uk/terms-and-conditions	http://www.patient.co.uk/terms-and-conditions			http://www.diabetes.org.uk/About_us/Legal-information/Privacy-policy/	http://www.diabetes.org.uk/About_us/Legal-information/Privacy-policy/									http://smart-droid.com/privacy.html	https://www.finerday.com/About/privacy_policy.html	https://folup.com/PatientTerm	https://folup.com/PatientTerm	*
4.2d						if 4.2b YES, does the URL work?	Yes/No	Pick Yes if the URL works correctly, otherwise No.	Yes	Yes	Yes	Yes	Yes	Yes	Yes			Yes	Yes	Yes	Yes	Yes	Yes	Yes	Yes	Yes	Yes				Yes	Yes			Yes	Yes									Yes	Yes	Yes	Yes	No
4.2e	57	33		2		If 4.2b YES, does the policy mention apps?	Yes/No	Pick Yes if the policy makes specific reference to apps.	Yes ('All material that appears at www.aidsmap.com and subsections thereof is copyright © NAM Publications, 2014. All rights reserved. © NAM Publications, 2014. All rights reserved. NAM is not responsible for the content of external websites.')	No	No	No	No	No	No	*	*	Yes ('If you register as a member, we collect data when you synchronise data held on your mobile phone')	Yes ('If you register as a member, we collect data when you synchronise data held on your mobile phone')	No	No	No	No	No	No	No	No	*	*	*	No	No	*	*	No	No	*	*	*	*	*	*	*	*	Yes (' We do not solicit children to use our apps. Our apps detects your device's approximate location whenever it is turned on (subject to coverage limitations).')	No	No	No	*
4.2f						Notes	Text		*	Policy doesn't mention apps.	Policy doesn't mention apps.	Policy doesn't mention apps.	Policy doesn't mention apps.	Policy doesn't mention apps.	Policy doesn't mention apps.	*	*	*	*	Policy doesn't mention apps.	*	Policy doesn't mention apps.	Policy doesn't mention apps.	Policy doesn't mention apps.	Policy doesn't mention apps.	Policy doesn't mention apps.	Policy doesn't mention apps.	*	*	*			*	*	Policy doesn't mention apps.	Policy doesn't mention apps.	*	Website states that "DrinkCoach can also be found on the NHS Health Apps Library. All apps hosted here have been reviewed by the NHS to ensure they are clinically safe, comply with data protection laws and trusted sources of information, such as NHS Choices."	*	*			*	*	*	*	*	*	*
						Do the policies describe what data can be requested?
4.3a	17	1		0	Identifying Information (Weaker)	Name (First or Unspecified)	WILL Transmit/WON'T Transmit/Not Addressed (NA)	Pick from the list depending on whether the policies state that this item will be collected.	WILL Transmit (Web='Personal information is any information that can be used to identify you. For example, it can include information such as your name, date of birth, email address, postal address, telephone number and credit/debit card details. We collect personal information when you contact us, register with us, order products and services (such as publications and email newsletters), make a …	NA	NA	WILL Transmit (Web='Personal information is information that can be used to identify you, such as your name, address, email address, phone number and so on, and which is not normally publicly available. name name')	WILL Transmit (Web='Personal information is information that can be used to identify you, such as your name, address, email address, phone number and so on, and which is not normally publicly available. name name')	NA	NA	*	*	WILL Transmit (App), WILL Transmit (Web) (App=' your name', Web=' your name')	WILL Transmit (App), WILL Transmit (Web) (App=' your name', Web=' your name')	NA	WILL Transmit (App=' name name')	NA	NA	NA	NA	NA	NA	*	*	*	WILL Transmit (Web=' name')	WILL Transmit (Web=' name')	*	*	WON'T Transmit (App), (App=' anonymous')	WON'T Transmit (App), (App=' anonymous')	*	*	*	*	*	*	*	*	WILL Transmit	WILL Transmit (Web=' name')	WILL Transmit (Web=' name of the person ')	WILL Transmit (Web=' name of the person ')	*
4.3b	18	1		0	Identifying Information (Strong)	Full Name	WILL Transmit/WON'T Transmit/Not Addressed (NA)	Pick from the list depending on whether the policies state that this item will be collected.	NA	NA	NA	NA	NA	NA	NA	*	*	NA	NA	NA	NA	WON'T Transmit (App), (App='All of this data is anonymous and cannot be traced back to an individual.')	WON'T Transmit (App), (App='All of this data is anonymous and cannot be traced back to an individual.')	NA	NA	WON'T Transmit (App), (App='All of this data is anonymous and cannot be traced back to an individual.')	WON'T Transmit (App), (App='All of this data is anonymous and cannot be traced back to an individual.')	*	*	*	NA	NA	*	*	WON'T Transmit (App), (App='anonymous, non-identifying')	WON'T Transmit (App), (App='anonymous, non-identifying')	*	*	WON'T Transmit (App)	WON'T Transmit (App)	*	*	*	*	WILL Transmit	NA	NA	NA	*
4.3c	19	1		0	Identifying Information (Weaker)	Age or Year of Birth	WILL Transmit/WON'T Transmit/Not Addressed (NA)	Pick from the list depending on whether the policies state that this item will be collected.	WILL Transmit (Web='Personal information is any information that can be used to identify you. For example, it can include information such as your name, date of birth, email address, postal address, telephone number and credit/debit card details. We collect personal information when you contact us, register with us, order products and services (such as publications and email newsletters), make a …	NA	NA	NA	NA	NA	NA	*	*	NA	NA	NA	NA	NA	NA	NA	NA	NA	NA	*	*	*	WILL Transmit (Web=', age')	WILL Transmit (Web=', age')	*	*	NA	NA	*	*	*	*	*	*	*	*	NA	NA	WILL Transmit (Web=', age')	WILL Transmit (Web=', age')	*
4.3d	20	1		0	Identifying Information (Strong)	Date of Birth	WILL Transmit/WON'T Transmit/Not Addressed (NA)	Pick from the list depending on whether the policies state that this item will be collected.	WILL Transmit (Web='Personal information is any information that can be used to identify you. For example, it can include information such as your name, date of birth, email address, postal address, telephone number and credit/debit card details. We collect personal information when you contact us, register with us, order products and services (such as publications and email newsletters), make a …	NA	NA	NA	NA	NA	NA	*	*	NA	NA	NA	NA	WON'T Transmit (App), (App='All of this data is anonymous and cannot be traced back to an individual.')	WON'T Transmit (App), (App='All of this data is anonymous and cannot be traced back to an individual.')	NA	NA	WON'T Transmit (App), (App='All of this data is anonymous and cannot be traced back to an individual.')	WON'T Transmit (App), (App='All of this data is anonymous and cannot be traced back to an individual.')	*	*	*	NA	NA	*	*	WON'T Transmit (App), (App='We collect anonymous, non-identifying')	WON'T Transmit (App), (App='We collect anonymous, non-identifying')	*	*	WON'T Transmit (App)	WON'T Transmit (App)	*	*	*	*	NA	NA	WILL Transmit (Web=' birth of the person')	WILL Transmit (Web=' birth of the person')	*
4.3e	21	1		0	Identifying Information (Weaker)	Gender	WILL Transmit/WON'T Transmit/Not Addressed (NA)	Pick from the list depending on whether the policies state that this item will be collected.	NA	NA	NA	NA	NA	NA	NA	*	*	NA	NA	NA	NA	NA	NA	NA	NA	NA	NA	*	*	*	NA	NA	*	*	NA	NA	*	*	*	*	*	*	*	*	NA	NA	WILL Transmit (Web=', gender, sex,')	WILL Transmit (Web=', gender, sex,')	*
4.3f	22	1		0	Sensitive Information (Other)	Ethnicity	WILL Transmit/WON'T Transmit/Not Addressed (NA)	Pick from the list depending on whether the policies state that this item will be collected.	NA	NA	NA	NA	NA	NA	NA	*	*	NA	NA	NA	NA	NA	NA	NA	NA	NA	NA	*	*	*	NA	NA	*	*	NA	NA	*	*	*	*	*	*	*	*	NA	NA	WILL Transmit (Web=' ethnic or social origin')	WILL Transmit (Web=' ethnic or social origin')	*
4.3g	23	1		0	Sensitive Information (Other)	Sexuality	WILL Transmit/WON'T Transmit/Not Addressed (NA)	Pick from the list depending on whether the policies state that this item will be collected.	NA	NA	NA	NA	NA	NA	NA	*	*	NA	NA	NA	NA	NA	NA	NA	NA	NA	NA	*	*	*	NA	NA	*	*	NA	NA	*	*	*	*	*	*	*	*	NA	NA	WILL Transmit (Web=' sexual orientation')	WILL Transmit (Web=' sexual orientation')	*
4.3h	24	1		0	Sensitive Information (Other)	Political Affiliation	WILL Transmit/WON'T Transmit/Not Addressed (NA)	Pick from the list depending on whether the policies state that this item will be collected.	NA	NA	NA	NA	NA	NA	NA	*	*	NA	NA	NA	NA	NA	NA	NA	NA	NA	NA	*	*	*	NA	NA	*	*	NA	NA	*	*	*	*	*	*	*	*	NA	NA	NA	NA	*
4.3i	25	1		0	Sensitive Information (Other)	Religious Beliefs	WILL Transmit/WON'T Transmit/Not Addressed (NA)	Pick from the list depending on whether the policies state that this item will be collected.	NA	NA	NA	NA	NA	NA	NA	*	*	NA	NA	NA	NA	NA	NA	NA	NA	NA	NA	*	*	*	NA	NA	*	*	NA	NA	*	*	*	*	*	*	*	*	NA	NA	WILL Transmit (Web=', religion, conscience, belief,')	WILL Transmit (Web=', religion, conscience, belief,')	*
4.3j	26	1		0	Sensitive Information (Other)	Employment Status	WILL Transmit/WON'T Transmit/Not Addressed (NA)	Pick from the list depending on whether the policies state that this item will be collected.	NA	NA	NA	NA	NA	NA	NA	*	*	NA	NA	NA	WILL Transmit (App=' information relating to any transactions carried out between you and us on or in relation to this website, including information relating to any purchases you make of our goods or services (including date and times of jobs worked, jobs posted, specific job details, personal preference details, skill set details, and financial details of each job, hours worked and hours posted…	NA	NA	NA	NA	NA	NA	*	*	*	NA	NA	*	*	NA	NA	*	*	*	*	*	*	*	*	NA	NA	WILL Transmit (Web=' employment history')	WILL Transmit (Web=' employment history')	*
4.3k	27	1		0	Sensitive Information (Medical)	Disability Status	WILL Transmit/WON'T Transmit/Not Addressed (NA)	Pick from the list depending on whether the policies state that this item will be collected.	NA	NA	NA	NA	NA	NA	NA	*	*	NA	NA	NA	NA	NA	NA	NA	NA	NA	NA	*	*	*	NA	NA	*	*	NA	NA	*	*	*	*	*	*	*	*	NA	NA	WILL Transmit (Web=', disability,')	WILL Transmit (Web=', disability,')	*
4.3l	28	1		0	Identifying Information (Strong)	Postal Address	WILL Transmit/WON'T Transmit/Not Addressed (NA)	Pick from the list depending on whether the policies state that this item will be collected.	NA	NA	NA	WILL Transmit (Web='Personal information is information that can be used to identify you, such as your name, address, email address, phone number and so on, and which is not normally publicly available.')	WILL Transmit (Web='Personal information is information that can be used to identify you, such as your name, address, email address, phone number and so on, and which is not normally publicly available.')	NA	NA	*	*	WILL Transmit (App), WILL Transmit (Web) (App=' address', Web=' address, ')	WILL Transmit (App), WILL Transmit (Web) (App=' address', Web=' address, ')	NA	WILL Transmit (App=' contact details) address')	WON'T Transmit (App), (App='All of this data is anonymous and cannot be traced back to an individual.')	WON'T Transmit (App), (App='All of this data is anonymous and cannot be traced back to an individual.')	NA	NA	WON'T Transmit (App), (App='All of this data is anonymous and cannot be traced back to an individual.')	WON'T Transmit (App), (App='All of this data is anonymous and cannot be traced back to an individual.')	*	*	*	WON'T Transmit (Web=' please do not include postal addresses')	WON'T Transmit (Web=' please do not include postal addresses')	*	*	WON'T Transmit (App), (App='We collect anonymous, non-identifying, a')	WON'T Transmit (App), (App='We collect anonymous, non-identifying, a')	*	*	WON'T Transmit (App)	WON'T Transmit (App)	*	*	*	*	WILL Transmit (Web=' addresses')	NA	WILL Transmit (Web=' physical address')	WILL Transmit (Web=' physical address')	*
4.3m	29	1		0	Identifying Information (Strong)	Full Postcode	WILL Transmit/WON'T Transmit/Not Addressed (NA)	Pick from the list depending on whether the policies state that this item will be collected.	WILL Transmit (Web='Personal information is any information that can be used to identify you. For example, it can include information such as your name, date of birth, email address, postal address, telephone number and credit/debit card details. We collect personal information when you contact us, register with us, order products and services (such as publications and email newsletters), make a …	NA	NA	WILL Transmit (Web='The website you sign up to will collect information such as your name, email address and post code. Once you register with that website you will not be anonymous to us when you subsequently sign in.')	WILL Transmit (Web='The website you sign up to will collect information such as your name, email address and post code. Once you register with that website you will not be anonymous to us when you subsequently sign in.')	NA	NA	*	*	WILL Transmit (App), WILL Transmit (Web) (App=' address', Web=' address, ')	WILL Transmit (App), WILL Transmit (Web) (App=' address', Web=' address, ')	NA	WILL Transmit (App=' contact details) address')	WON'T Transmit (App), (App='All of this data is anonymous and cannot be traced back to an individual.')	WON'T Transmit (App), (App='All of this data is anonymous and cannot be traced back to an individual.')	NA	NA	WON'T Transmit (App), (App='All of this data is anonymous and cannot be traced back to an individual.')	WON'T Transmit (App), (App='All of this data is anonymous and cannot be traced back to an individual.')	*	*	*	WON'T Transmit (Web=' please do not include postal addresses')	WON'T Transmit (Web=' please do not include postal addresses')	*	*	WON'T Transmit (App),	WON'T Transmit (App),	*	*	WON'T Transmit (App)	WON'T Transmit (App)	*	*	*	*	WILL Transmit (Web=' addresses')	NA	NA	NA	*
4.3ar					Identifying Information (Weaker)	Country or Area or Partial Postcode	WILL Transmit/WON'T Transmit/Not Addressed (NA)	Pick from the list depending on whether the policies state that this item will be collected.	WILL Transmit (Web='Personal information is any information that can be used to identify you. For example, it can include information such as your name, date of birth, email address, postal address, telephone number and credit/debit card details. We collect personal information when you contact us, register with us, order products and services (such as publications and email newsletters), make a …	NA	NA	NA	NA	NA	NA	*	*	NA	NA	NA	NA	NA	NA	NA	NA	NA	NA	*	*	*	NA	NA	*	*	NA	NA	*	*	*	*	*	*	*	*	*	NA	NA	NA	NA
4.3n	30	1		0	Identifying Information (Weaker)	Geolocation	WILL Transmit/WON'T Transmit/Not Addressed (NA)	Pick from the list depending on whether the policies state that this item will be collected.	NA	NA	NA	NA	NA	NA	NA	*	*	WILL Transmit (App), (App=' geo-localisation data,')	WILL Transmit (App), (App=' geo-localisation data,')	NA	WILL Transmit (App='geographical locatio')	NA	NA	NA	NA	NA	NA	*	*	*	NA	NA	*	*	WON'T Transmit (App),	WON'T Transmit (App),	*	*	*	*	*	*	*	*	WILL Transmit (Web=' wireless device location')	NA	NA	NA	*
4.3o	31	1		0	Identifying Information (Strong)	Email Address	WILL Transmit/WON'T Transmit/Not Addressed (NA)	Pick from the list depending on whether the policies state that this item will be collected.	WILL Transmit (Web='Personal information is any information that can be used to identify you. For example, it can include information such as your name, date of birth, email address, postal address, telephone number and credit/debit card details. We collect personal information when you contact us, register with us, order products and services (such as publications and email newsletters), make a …	WILL Transmit (Web='The Aspergillus Website collects some personal information when users register and this information is stored in a secure database. The e-mail address will be used to send confirmation of your username and password')	WILL Transmit (Web='The Aspergillus Website collects some personal information when users register and this information is stored in a secure database. The e-mail address will be used to send confirmation of your username and password')	WILL Transmit (Web='Personal information is information that can be used to identify you, such as your name, address, email address, phone number and so on, and which is not normally publicly available. email address ')	WILL Transmit (Web='Personal information is information that can be used to identify you, such as your name, address, email address, phone number and so on, and which is not normally publicly available. email address ')	NA	NA	*	*	WILL Transmit (App), WILL Transmit (Web) (App=' email address', Web=' email address')	WILL Transmit (App), WILL Transmit (Web) (App=' email address', Web=' email address')	WILL Transmit (Web='This system will record your email address')	WILL Transmit (App=' email address')	WON'T Transmit (App), (App='All of this data is anonymous and cannot be traced back to an individual.')	WON'T Transmit (App), (App='All of this data is anonymous and cannot be traced back to an individual.')	WILL Transmit (App), (App='In order to activate this app, we ask you to enter an email address. Your email address will be passed to other data processors acting')	WILL Transmit (App), (App='In order to activate this app, we ask you to enter an email address. Your email address will be passed to other data processors acting')	WON'T Transmit (App), (App='All of this data is anonymous and cannot be traced back to an individual.')	WON'T Transmit (App), (App='All of this data is anonymous and cannot be traced back to an individual.')	*	*	*	WILL Transmit (Web='a valid email address')	WILL Transmit (Web='a valid email address')	*	*	WON'T Transmit (App), (App='We collect anonymous, non-identifying, aggregate')	WON'T Transmit (App), (App='We collect anonymous, non-identifying, aggregate')	*	*	WON'T Transmit (App)	WON'T Transmit (App)	*	*	*	*	WILL Transmit (Web=' when you e-mail,')	WILL Transmit (Web=' email address')	WILL Transmit (Web=' e-mail address')	WILL Transmit (Web=' e-mail address')	*
4.3p	32	1		0	Identifying Information (Strong)	Telephone Numbers	WILL Transmit/WON'T Transmit/Not Addressed (NA)	Pick from the list depending on whether the policies state that this item will be collected.	WILL Transmit (Web='Personal information is any information that can be used to identify you. For example, it can include information such as your name, date of birth, email address, postal address, telephone number and credit/debit card details. We collect personal information when you contact us, register with us, order products and services (such as publications and email newsletters), make a …	NA	NA	WILL Transmit (Web='Personal information is information that can be used to identify you, such as your name, address, email address, phone number and so on, and which is not normally publicly available.')	WILL Transmit (Web='Personal information is information that can be used to identify you, such as your name, address, email address, phone number and so on, and which is not normally publicly available.')	NA	NA	*	*	WILL Transmit (App), WILL Transmit (Web) (App=', telephone number', Web=', telephone number')	WILL Transmit (App), WILL Transmit (Web) (App=', telephone number', Web=', telephone number')	NA	WILL Transmit (App=' phone')	WON'T Transmit (App), (App='All of this data is anonymous and cannot be traced back to an individual.')	WON'T Transmit (App), (App='All of this data is anonymous and cannot be traced back to an individual.')	NA	NA	WON'T Transmit (App), (App='All of this data is anonymous and cannot be traced back to an individual.')	WON'T Transmit (App), (App='All of this data is anonymous and cannot be traced back to an individual.')	*	*	*	NA	NA	*	*	WON'T Transmit (App),	WON'T Transmit (App),	*	*	WON'T Transmit (App)	WON'T Transmit (App)	*	*	*	*	WILL Transmit (Web=' telephone numbers')	NA	WILL Transmit (Web=', telephone number')	WILL Transmit (Web=', telephone number')	*
4.3q	33	1		0	Identifying Information (Strong)	Username	WILL Transmit/WON'T Transmit/Not Addressed (NA)	Pick from the list depending on whether the policies state that this item will be collected.	NA	WILL Transmit (Web='The Aspergillus Website collects some personal information when users register and this information is stored in a secure database. The e-mail address will be used to send confirmation of your username and password')	WILL Transmit (Web='The Aspergillus Website collects some personal information when users register and this information is stored in a secure database. The e-mail address will be used to send confirmation of your username and password')	NA	NA	NA	NA	*	*	WILL Transmit (App), WILL Transmit (Web) (App=' member name', Web=' member name')	WILL Transmit (App), WILL Transmit (Web) (App=' member name', Web=' member name')	NA	NA	WON'T Transmit (App), (App='All of this data is anonymous and cannot be traced back to an individual.')	WON'T Transmit (App), (App='All of this data is anonymous and cannot be traced back to an individual.')	NA	NA	WON'T Transmit (App), (App='All of this data is anonymous and cannot be traced back to an individual.')	WON'T Transmit (App), (App='All of this data is anonymous and cannot be traced back to an individual.')	*	*	*	WILL Transmit (Web=' user names nickname')	WILL Transmit (Web=' user names nickname')	*	*	WON'T Transmit (App), (App='anonymous, non-identifying')	WON'T Transmit (App), (App='anonymous, non-identifying')	*	*	WON'T Transmit (App)	WON'T Transmit (App)	*	*	*	*	NA	NA	WILL Transmit (Web='e user name, ')	WILL Transmit (Web='e user name, ')	*
4.3s	34	1		0	Identifying Information (Strong)	Password	WILL Transmit/WON'T Transmit/Not Addressed (NA)	Pick from the list depending on whether the policies state that this item will be collected.	NA	WILL Transmit (Web='The Aspergillus Website collects some personal information when users register and this information is stored in a secure database The e-mail address will be used to send confirmation of your username and password, and will be used to send you emails containing details of our new additions and updates.')	WILL Transmit (Web='The Aspergillus Website collects some personal information when users register and this information is stored in a secure database The e-mail address will be used to send confirmation of your username and password, and will be used to send you emails containing details of our new additions and updates.')	NA	NA	NA	NA	*	*	WILL Transmit (App), WILL Transmit (Web) (App=', password,', Web=' password')	WILL Transmit (App), WILL Transmit (Web) (App=', password,', Web=' password')	NA	WILL Transmit (App='We will store all the personal information you provide on our secure (password- and firewall- protected) servers. We will not ask you for your password (except when you log in to the website).')	WON'T Transmit (App), (App='All of this data is anonymous and cannot be traced back to an individual.')	WON'T Transmit (App), (App='All of this data is anonymous and cannot be traced back to an individual.')	NA	NA	WON'T Transmit (App), (App='All of this data is anonymous and cannot be traced back to an individual.')	WON'T Transmit (App), (App='All of this data is anonymous and cannot be traced back to an individual.')	*	*	*	NA	NA	*	*	WILL Transmit (Web='a password ')	WILL Transmit (Web='a password ')	*	*	WON'T Transmit (App)	WON'T Transmit (App)	*	*	*	*	NA	WILL Transmit (Web='r account password')	WILL Transmit (Web=' password ')	WILL Transmit (Web=' password ')	*
4.3t	35	1		0	Identifying Information (Strong)	Medical System Numbers	WILL Transmit/WON'T Transmit/Not Addressed (NA)	Pick from the list depending on whether the policies state that this item will be collected.	NA	NA	NA	NA	NA	NA	NA	*	*	NA	NA	NA	NA	WON'T Transmit (App), (App='All of this data is anonymous and cannot be traced back to an individual.')	WON'T Transmit (App), (App='All of this data is anonymous and cannot be traced back to an individual.')	NA	NA	WON'T Transmit (App), (App='All of this data is anonymous and cannot be traced back to an individual.')	WON'T Transmit (App), (App='All of this data is anonymous and cannot be traced back to an individual.')	*	*	*	NA	NA	*	*	WON'T Transmit (App), (App='We collect anonymous, non-identifying, aggregate information a')	WON'T Transmit (App), (App='We collect anonymous, non-identifying, aggregate information a')	*	*	WON'T Transmit (App)	WON'T Transmit (App)	*	*	*	*	NA	NA	WILL Transmit (Web=' identifying number')	WILL Transmit (Web=' identifying number')	*
4.3u	36	1		0	Identifying Information (Strong)	Social Security Number	WILL Transmit/WON'T Transmit/Not Addressed (NA)	Pick from the list depending on whether the policies state that this item will be collected.	NA	NA	NA	NA	NA	NA	NA	*	*	NA	NA	NA	NA	WON'T Transmit (App), (App='All of this data is anonymous and cannot be traced back to an individual.')	WON'T Transmit (App), (App='All of this data is anonymous and cannot be traced back to an individual.')	NA	NA	WON'T Transmit (App), (App='All of this data is anonymous and cannot be traced back to an individual.')	WON'T Transmit (App), (App='All of this data is anonymous and cannot be traced back to an individual.')	*	*	*	NA	NA	*	*	WON'T Transmit (App), (App='We collect anonymous, non-identifying')	WON'T Transmit (App), (App='We collect anonymous, non-identifying')	*	*	WON'T Transmit (App)	WON'T Transmit (App)	*	*	*	*	WILL Transmit (Web=' social security number')	NA	WILL Transmit (Web='y identifying number,')	WILL Transmit (Web='y identifying number,')	*
4.3v	37	1		0	Other Information	Hobbies and Interests	WILL Transmit/WON'T Transmit/Not Addressed (NA)	Pick from the list depending on whether the policies state that this item will be collected.	NA	NA	NA	NA	NA	NA	NA	*	*	NA	NA	NA	WILL Transmit (App=' personal preference details, skill set details,')	WILL Transmit (Web='a Facebook Like button')	WILL Transmit (Web='a Facebook Like button')	WILL Transmit (Web='a Facebook Like button')	WILL Transmit (Web='a Facebook Like button')	WILL Transmit (Web='a Facebook Like button')	WILL Transmit (Web='a Facebook Like button')	*	*	*	NA	NA	*	*	NA	NA	*	*	*	*	*	*	*	*	NA	NA	NA	NA	*
4.3x	38	1		0	Sensitive Information (Measurements)	Measured Health Parameters	WILL Transmit/WON'T Transmit/Not Addressed (NA)	Pick from the list depending on whether the policies state that this item will be collected.	NA	NA	NA	NA	NA	NA	NA	*	*	WILL Transmit (App), (App=' add your weight and waist history')	WILL Transmit (App), (App=' add your weight and waist history')	NA	NA	NA	NA	NA	NA	NA	NA	*	*	*	NA	NA	*	*	NA	NA	*	*	*	*	*	*	*	*	NA	NA	WILL Transmit (Web=' clinical laboratory reporting')	WILL Transmit (Web=' clinical laboratory reporting')	*
4.3y	39	1		0	Sensitive Information (Medical)	Medical History	WILL Transmit/WON'T Transmit/Not Addressed (NA)	Pick from the list depending on whether the policies state that this item will be collected.	NA	NA	NA	NA	NA	NA	NA	*	*	NA	NA	NA	NA	NA	NA	NA	NA	NA	NA	*	*	*	WILL Transmit (Web=' medical conditions')	WILL Transmit (Web=' medical conditions')	*	*	NA	NA	*	*	*	*	*	*	*	*	NA	NA	WILL Transmit (Web=' physical health, e medical history')	WILL Transmit (Web=' physical health, e medical history')	*
4.3z	40	1		0	Sensitive Information (Medical)	HIV Status	WILL Transmit/WON'T Transmit/Not Addressed (NA)	Pick from the list depending on whether the policies state that this item will be collected.	NA	NA	NA	NA	NA	NA	NA	*	*	NA	NA	NA	NA	NA	NA	NA	NA	NA	NA	*	*	*	NA	NA	*	*	NA	NA	*	*	*	*	*	*	*	*	NA	NA	NA	NA	*
4.3aa	41	1		0	Sensitive Information (Medical)	Mental Health Status	WILL Transmit/WON'T Transmit/Not Addressed (NA)	Pick from the list depending on whether the policies state that this item will be collected.	NA	NA	NA	NA	NA	NA	NA	*	*	NA	NA	NA	NA	NA	NA	NA	NA	NA	NA	*	*	*	NA	NA	*	*	NA	NA	*	*	*	*	*	*	*	*	NA	NA	WILL Transmit (Web=' mental health,')	WILL Transmit (Web=' mental health,')	*
4.3ab	42	1		0	Sensitive Information (Medical)	Medications	WILL Transmit/WON'T Transmit/Not Addressed (NA)	Pick from the list depending on whether the policies state that this item will be collected.	NA	NA	NA	NA	NA	NA	NA	*	*	NA	NA	NA	NA	NA	NA	NA	NA	NA	NA	*	*	*	NA	NA	*	*	NA	NA	*	*	*	*	*	*	*	*	NA	NA	NA	NA	*
4.3ac	43	1		0	Sensitive Information (Medical)	Substance Use	WILL Transmit/WON'T Transmit/Not Addressed (NA)	Pick from the list depending on whether the policies state that this item will be collected.	NA	NA	NA	NA	NA	NA	NA	*	*	NA	NA	NA	NA	NA	NA	NA	NA	NA	NA	*	*	*	NA	NA	*	*	NA	NA	*	*	*	*	*	*	*	*	NA	NA	NA	NA	*
4.3ad	44	1		0	Sensitive Information (Medical)	Genetic Information	WILL Transmit/WON'T Transmit/Not Addressed (NA)	Pick from the list depending on whether the policies state that this item will be collected.	NA	NA	NA	NA	NA	NA	NA	*	*	NA	NA	NA	NA	NA	NA	NA	NA	NA	NA	*	*	*	NA	NA	*	*	NA	NA	*	*	*	*	*	*	*	*	NA	NA	NA	NA	*
4.3ae	45	1		0	Sensitive Information (Medical)	IVF Information	WILL Transmit/WON'T Transmit/Not Addressed (NA)	Pick from the list depending on whether the policies state that this item will be collected.	NA	NA	NA	NA	NA	NA	NA	*	*	NA	NA	NA	NA	NA	NA	NA	NA	NA	NA	*	*	*	NA	NA	*	*	NA	NA	*	*	*	*	*	*	*	*	NA	NA	NA	NA	*
4.3af	46	1		0	Identifying Information (Strong)	Photographs of People	WILL Transmit/WON'T Transmit/Not Addressed (NA)	Pick from the list depending on whether the policies state that this item will be collected.	NA	NA	NA	NA	NA	NA	NA	*	*	NA	NA	NA	WILL Transmit (App=' photographs')	WON'T Transmit (App), (App='All of this data is anonymous and cannot be traced back to an individual.')	WON'T Transmit (App), (App='All of this data is anonymous and cannot be traced back to an individual.')	NA	NA	WON'T Transmit (App), (App='All of this data is anonymous and cannot be traced back to an individual.')	WON'T Transmit (App), (App='All of this data is anonymous and cannot be traced back to an individual.')	*	*	*	NA	NA	*	*	WON'T Transmit (App), (App='anonymous, non-identifying')	WON'T Transmit (App), (App='anonymous, non-identifying')	*	*	WON'T Transmit (App)	WON'T Transmit (App)	*	*	*	*	NA	WILL Transmit (Web=' photo')	NA	NA	*
4.3ag	47	1		0	Other Information	Other Photographs	WILL Transmit/WON'T Transmit/Not Addressed (NA)	Pick from the list depending on whether the policies state that this item will be collected.	NA	NA	NA	NA	NA	NA	NA	*	*	NA	NA	NA	NA	NA	NA	NA	NA	NA	NA	*	*	*	WILL Transmit (Web=' photographs,')	WILL Transmit (Web=' photographs,')	*	*	NA	NA	*	*	*	*	*	*	*	*	NA	NA	NA	NA	*
4.3ah	48	1		0	Identifying Information (Strong)	Social Network Credentials	WILL Transmit/WON'T Transmit/Not Addressed (NA)	Pick from the list depending on whether the policies state that this item will be collected.	NA	NA	NA	NA	NA	NA	NA	*	*	NA	NA	NA	NA	WILL Transmit (Web='When visiting pages that display a Facebook Like button, information relating to the date and time of your visit, the web page you are on (commonly known as the URL) and other technical information about the IP address, browser and operating system you use will be collected by Facebook. If you are logged into Facebook, your user ID number will also be associated with the infor…	WILL Transmit (Web='When visiting pages that display a Facebook Like button, information relating to the date and time of your visit, the web page you are on (commonly known as the URL) and other technical information about the IP address, browser and operating system you use will be collected by Facebook. If you are logged into Facebook, your user ID number will also be associated with the infor…	WILL Transmit (Web='When visiting pages that display a Facebook Like button, information relating to the date and time of your visit, the web page you are on (commonly known as the URL) and other technical information about the IP address, browser and operating system you use will be collected by Facebook. If you are logged into Facebook, your user ID number will also be associated with the infor…	WILL Transmit (Web='When visiting pages that display a Facebook Like button, information relating to the date and time of your visit, the web page you are on (commonly known as the URL) and other technical information about the IP address, browser and operating system you use will be collected by Facebook. If you are logged into Facebook, your user ID number will also be associated with the infor…	WILL Transmit (Web='When visiting pages that display a Facebook Like button, information relating to the date and time of your visit, the web page you are on (commonly known as the URL) and other technical information about the IP address, browser and operating system you use will be collected by Facebook. If you are logged into Facebook, your user ID number will also be associated with the infor…	NA	*	*	*	NA	NA	*	*	WON'T Transmit (App), (App='anonymous, non-identifying')	WON'T Transmit (App), (App='anonymous, non-identifying')	*	*	WON'T Transmit (App)	WON'T Transmit (App)	*	*	*	*	NA	NA	NA	NA	*
4.3ai	49	1		0	Identifying Information (Strong)	Others' Contact Details	WILL Transmit/WON'T Transmit/Not Addressed (NA)	Pick from the list depending on whether the policies state that this item will be collected.	NA	NA	NA	NA	NA	NA	NA	*	*	NA	NA	NA	NA	WON'T Transmit (App), (App='All of this data is anonymous and cannot be traced back to an individual.')	WON'T Transmit (App), (App='All of this data is anonymous and cannot be traced back to an individual.')	NA	NA	WON'T Transmit (App), (App='All of this data is anonymous and cannot be traced back to an individual.')	WON'T Transmit (App), (App='All of this data is anonymous and cannot be traced back to an individual.')	*	*	*	NA	NA	*	*	WON'T Transmit (App), (App='anonymous, non-identifying')	WON'T Transmit (App), (App='anonymous, non-identifying')	*	*	WON'T Transmit (App)	WON'T Transmit (App)	*	*	*	*	NA	NA	NA	NA	*
4.3aj	50	1		0	Identifying Information (Strong)	Others Email Addresses	WILL Transmit/WON'T Transmit/Not Addressed (NA)	Pick from the list depending on whether the policies state that this item will be collected.	NA	NA	NA	NA	NA	NA	NA	*	*	NA	NA	NA	NA	WON'T Transmit (App), (App='All of this data is anonymous and cannot be traced back to an individual.')	WON'T Transmit (App), (App='All of this data is anonymous and cannot be traced back to an individual.')	NA	NA	WON'T Transmit (App), (App='All of this data is anonymous and cannot be traced back to an individual.')	WON'T Transmit (App), (App='All of this data is anonymous and cannot be traced back to an individual.')	*	*	*	NA	NA	*	*	WON'T Transmit (App), (App='anonymous, non-identifying')	WON'T Transmit (App), (App='anonymous, non-identifying')	*	*	WON'T Transmit (App)	WON'T Transmit (App)	*	*	*	*	NA	NA	NA	NA	*
4.3ak	51	1		0	Other Information	User Generated Content Not Previously Covered	WILL Transmit/WON'T Transmit/Not Addressed (NA)	Pick from the list depending on whether the policies state that this item will be collected.	NA	NA	NA	NA	NA	WILL Transmit (Web='We may also ask you for information when you enter a competition or promotion sponsored by Brush DJ and when you report a problem with our site. If you contact us, we may keep a record of that correspondence We may also ask you to complete surveys that we use for research purposes, although you do not have to respond to them.')	WILL Transmit (Web='We may also ask you for information when you enter a competition or promotion sponsored by Brush DJ and when you report a problem with our site. If you contact us, we may keep a record of that correspondence We may also ask you to complete surveys that we use for research purposes, although you do not have to respond to them.')	*	*	WILL Transmit (App), WILL Transmit (Web) (App=', profiles, personal descriptions, food consumption history', Web=', comments, profiles, personal descriptions, food consumption history and other information from which You can be identified and which You may disclose to Us')	WILL Transmit (App), WILL Transmit (Web) (App=', profiles, personal descriptions, food consumption history', Web=', comments, profiles, personal descriptions, food consumption history and other information from which You can be identified and which You may disclose to Us')	WILL Transmit (Web=' other information if volunteered to us by yo')	WILL Transmit (App='(including date and times of jobs worked, jobs posted, specific job details, personal preference details, skill set details, and financial details of each job, hours worked and hours posted by employers skills details, personal preferences, desired job details, advertised job details, descriptive personal statement, photographs of yoursel')	WILL Transmit (Web='We also collect information when you give it to us on registering for Change4Life')	WILL Transmit (Web='We also collect information when you give it to us on registering for Change4Life')	WILL Transmit (Web='We also collect information when you give it to us on registering for Change4Life')	WILL Transmit (Web='We also collect information when you give it to us on registering for Change4Life')	WILL Transmit (Web='We also collect information when you give it to us on registering for Change4Life')	WILL Transmit (Web='u give it to us on registering for Change4Life')	*	*	*	WILL Transmit (Web='It contains discussion forums that allow members of the public to leave descriptions of illnesses and to express their views on health matters If you submit any contribution to this Website via the forum (including any text, photographs, graphics, video or audio) you agree, by submitting your contribution, to grant EMIS a perpetual, royalty-free, non-exclusive, right to modify…	WILL Transmit (Web='It contains discussion forums that allow members of the public to leave descriptions of illnesses and to express their views on health matters If you submit any contribution to this Website via the forum (including any text, photographs, graphics, video or audio) you agree, by submitting your contribution, to grant EMIS a perpetual, royalty-free, non-exclusive, right to modify…	*	*	WILL Transmit (Web='f registering to use our site, subscribing to our service, posting material or requesting further services information when you enter a competition or promotion complete surveys')	WILL Transmit (Web='f registering to use our site, subscribing to our service, posting material or requesting further services information when you enter a competition or promotion complete surveys')	*	*	*	*	*	*	*	*	WILL Transmit (Web=' call records For example, our systems capture details about the type and location of wireless device(s) you use, calls and text messages you send and receive, and other data services you use (for example your ringtone purchases).')	WILL Transmit (Web='d any other personal or preference information that you choose to submit If you post personally identifiable information in areas of the site accessible to other users, you should be aware that such information can be read, collected, or used by other users of these areas, and could be used improperly to send you unsolicited messages. submit in these forums ')	WON'T Transmit (Web='. any identifying number, symbol, e-mail address, physical address, telephone number or other particular assignment to the person; 1.7.4. the biometric information of the person; 1.7.5. the personal opinions, views or preferences of the person; 1.7.6. correspondence sent by the person that is implicitly or explicitly of a private or confidential nature or further corresponden…	WON'T Transmit (Web='. any identifying number, symbol, e-mail address, physical address, telephone number or other particular assignment to the person; 1.7.4. the biometric information of the person; 1.7.5. the personal opinions, views or preferences of the person; 1.7.6. correspondence sent by the person that is implicitly or explicitly of a private or confidential nature or further corresponden…	*
4.3al	52	1		0	Analytics Data	Usage Data	WILL Transmit/WON'T Transmit/Not Addressed (NA)	Pick from the list depending on whether the policies state that this item will be collected.	WILL Transmit (Web='NAM uses Google Analytics to track how this website is used. Google Analytics uses cookies to help gather statistics on how people use this website. For example, which country the user is from, and which pages you visit while on the website. We use this information in several ways. For example, we look at how our website is being used so we can assess how well it is working an…	WILL Transmit (Web='Continuous logs are maintained of The Aspergillus Website web server activity. These log files include the details of your IP address, browser type, page last visited etc. Log files are used to analyse usage of The Aspergillus Website, and may be kept in an anonymised form for historical record')	WILL Transmit (Web='Continuous logs are maintained of The Aspergillus Website web server activity. These log files include the details of your IP address, browser type, page last visited etc. Log files are used to analyse usage of The Aspergillus Website, and may be kept in an anonymised form for historical record')	WILL Transmit (Web='to see what website content is popular and how people are using the site as they allow us to track users movement through our websites. This type of information is amalgamated so that we can build up a picture of how the site is performing.')	WILL Transmit (Web='to see what website content is popular and how people are using the site as they allow us to track users movement through our websites. This type of information is amalgamated so that we can build up a picture of how the site is performing.')	WILL Transmit (Web='This is statistical data about our users' browsing actions and patterns, and does not identify any individual.')	WILL Transmit (Web='This is statistical data about our users' browsing actions and patterns, and does not identify any individual.')	*	*	NA	NA	WILL Transmit (Web='Google Analytics stores information about what pages you visit, how long you are on the site, how you got here and what you click on.')	WILL Transmit (App=' information about your computer and about your visits to and use of this website (including your IP address, geographical location, browser type and version, operating system, referral source, length of visit, page views, website navigation and identifying information such as name and contact details)')	WILL Transmit (Web='We analyse it to see what is most effective about our site, to help us identify ways to improve it, and to make it more effective. We may also use data for other purposes, which we would describe to you at the point we collect the informatio')	WILL Transmit (Web='We analyse it to see what is most effective about our site, to help us identify ways to improve it, and to make it more effective. We may also use data for other purposes, which we would describe to you at the point we collect the informatio')	WILL Transmit (Web='We analyse it to see what is most effective about our site, to help us identify ways to improve it, and to make it more effective. We may also use data for other purposes, which we would describe to you at the point we collect the informatio')	WILL Transmit (Web='We analyse it to see what is most effective about our site, to help us identify ways to improve it, and to make it more effective. We may also use data for other purposes, which we would describe to you at the point we collect the informatio')	WILL Transmit (Web='We analyse it to see what is most effective about our site, to help us identify ways to improve it, and to make it more effective. We may also use data for other purposes, which we would describe to you at the point we collect the informatio')	WILL Transmit (Web='how you entered our site, how you navigated through the site, and what information was of interest to you.')	*	*	*	NA	NA	*	*	WILL Transmit (App), WILL Transmit (Web) (App=' app usage via Flurry Analytics ', Web=' statistical data about our users' browsing actions and patterns your general internet usage by using a cookie file how many people are opening and reading our emails track how our advertisements perform')	WILL Transmit (App), WILL Transmit (Web) (App=' app usage via Flurry Analytics ', Web=' statistical data about our users' browsing actions and patterns your general internet usage by using a cookie file how many people are opening and reading our emails track how our advertisements perform')	*	*	*	*	*	*	*	*	WILL Transmit (Web=' we automatically receive certain information, such as your IP address, browser type, date and time, and the Web page you visited before visiting our site.')	WILL Transmit (Web=' aggregating and analyzing data and site usage')	WILL Transmit (Web='. FolUp makes use of IP addresses to analyze trends, administer the Website and gather broad demographic information for aggregate FolUp monitors and audits system and/or Website use in order to ensure that Users are using the facilities available on the Website appropriately')	WILL Transmit (Web='. FolUp makes use of IP addresses to analyze trends, administer the Website and gather broad demographic information for aggregate FolUp monitors and audits system and/or Website use in order to ensure that Users are using the facilities available on the Website appropriately')	*
4.3am	89	1		0	Identifying Information (Strong)	Device Unique Identifier	WILL Transmit/WON'T Transmit/Not Addressed (NA)	Pick from the list depending on whether the policies state that this item will be collected.	NA	NA	NA	NA	NA	NA	NA	*	*	WILL Transmit (App), (App=' Mobile UDID')	WILL Transmit (App), (App=' Mobile UDID')	NA	NA	WON'T Transmit (App), (App='All of this data is anonymous and cannot be traced back to an individual.')	WON'T Transmit (App), (App='All of this data is anonymous and cannot be traced back to an individual.')	NA	NA	WON'T Transmit (App), (App='All of this data is anonymous and cannot be traced back to an individual.')	WON'T Transmit (App), (App='All of this data is anonymous and cannot be traced back to an individual.')	*	*	*	NA	NA	*	*	WON'T Transmit (App), (App='We collect anonymous, non-identifying,')	WON'T Transmit (App), (App='We collect anonymous, non-identifying,')	*	*	WON'T Transmit (App)	WON'T Transmit (App)	*	*	*	*	NA	NA	NA	NA	*
4.3an	91	1		0	Identifying Information (Weaker)	Other Unique Identifier	WILL Transmit/WON'T Transmit/Not Addressed (NA)	Pick from the list depending on whether the policies state that this item will be collected.	NA	NA	NA	NA	NA	NA	NA	*	*	NA	NA	NA	WILL Transmit (App=' identifying information such as name and contact details')	NA	NA	NA	NA	NA	NA	*	*	*	NA	NA	*	*	NA	NA	*	*	*	*	*	*	*	*	NA	WILL Transmit (Web=' recognize your computer each time')	NA	NA	*
4.3ao	92	1		0	Protocol-Standard Data	Device Characteristics	WILL Transmit/WON'T Transmit/Not Addressed (NA)	Pick from the list depending on whether the policies state that this item will be collected.	NA	WILL Transmit (Web=' browser type')	WILL Transmit (Web=' browser type')	NA	NA	WILL Transmit (Web=' operating system and browser type, ')	WILL Transmit (Web=' operating system and browser type, ')	*	*	NA	NA	NA	WILL Transmit (App=' browser type and version, operating system')	WILL Transmit (Web=' browser and operating system')	WILL Transmit (Web=' browser and operating system')	WILL Transmit (Web=' browser and operating system')	WILL Transmit (Web=' browser and operating system')	WILL Transmit (Web=' browser and operating system')	WILL Transmit (Web=' browser and operating system you use will be collected by Facebook')	*	*	*	NA	NA	*	*	NA	NA	*	*	*	*	*	*	*	*	WILL Transmit (Web=', browser type')	WILL Transmit (Web=' browser type')	NA	NA	*
4.3ap	93	1		0	Protocol-Standard Data	IP Address	WILL Transmit/WON'T Transmit/Not Addressed (NA)	Pick from the list depending on whether the policies state that this item will be collected.	NA	WILL Transmit (Web=' details of your IP address')	WILL Transmit (Web=' details of your IP address')	WILL Transmit (Web='Through the use of cookies, we will receive information from your computer such as your IP address (the unique number that identifies your computer when you use the internet) and we will record this information.')	WILL Transmit (Web='Through the use of cookies, we will receive information from your computer such as your IP address (the unique number that identifies your computer when you use the internet) and we will record this information.')	WILL Transmit (Web=' your IP address')	WILL Transmit (Web=' your IP address')	*	*	NA	NA	WILL Transmit (Web=' logs the user's IP address that is automatically recognised by the web server')	WILL Transmit (App=' IP address,')	WILL Transmit (Web=' Internet address IP address')	WILL Transmit (Web=' Internet address IP address')	WILL Transmit (Web=' Internet address IP address')	WILL Transmit (Web=' Internet address IP address')	WILL Transmit (Web=' Internet address IP address')	WILL Transmit (Web=' IP address')	*	*	*	WILL Transmit (Web='The IP address of all posts is recorded')	WILL Transmit (Web='The IP address of all posts is recorded')	*	*	WON'T Transmit (App), (App='We collect anonymous, non-identifying,')	WON'T Transmit (App), (App='We collect anonymous, non-identifying,')	*	*	*	*	*	*	*	*	WILL Transmit (Web=' IP address')	WILL Transmit (Web=' IP address')	WILL Transmit (Web='p makes use of IP addresses to analyze trends, administer the Website and gather broad demographic information for aggregate use')	WILL Transmit (Web='p makes use of IP addresses to analyze trends, administer the Website and gather broad demographic information for aggregate use')	*
4.3aq	94	1		0	Identifying Information (Strong)	Financial/Payment Details	WILL Transmit/WON'T Transmit/Not Addressed (NA)	Pick from the list depending on whether the policies state that this item will be collected.	NA	NA	NA	NA	NA	NA	NA	*	*	WILL Transmit (App), WILL Transmit (Web) (App=', financial details', Web=' financial details')	WILL Transmit (App), WILL Transmit (Web) (App=', financial details', Web=' financial details')	NA	WILL Transmit (App=' financial details of each job')	WON'T Transmit (App), (App='All of this data is anonymous and cannot be traced back to an individual.')	WON'T Transmit (App), (App='All of this data is anonymous and cannot be traced back to an individual.')	NA	NA	WON'T Transmit (App), (App='All of this data is anonymous and cannot be traced back to an individual.')	WON'T Transmit (App), (App='All of this data is anonymous and cannot be traced back to an individual.')	*	*	*	NA	NA	*	*	WILL Transmit (Web=' payment details Any payment transactions will be encrypted using industry standard technology')	WILL Transmit (Web=' payment details Any payment transactions will be encrypted using industry standard technology')	*	*	WON'T Transmit (App)	WON'T Transmit (App)	*	*	*	*	WILL Transmit (Web=' when you provide sensitive information (such as credit card numbers) to our Web sites')	WILL Transmit (Web='o process payments')	WILL Transmit (Web=', financial history ')	WILL Transmit (Web=', financial history ')	*
						Do the policies describe how data will be handled…
4.4a	4	1		1		Primary uses of collected data	Addressed/Not Addressed (NA)	Pick from list depending on which policy or policies address the issue.	Addressed (Web='We use your personal information to give you the information, support, services, or products you ask for. We may also use your information for administrative purposes, to let you know about changes to our services and, if you agree, as part of our fundraising activities. We use this information in several ways. For example, we look at how our website is being used so we can assess…	Addressed (Web='e Aspergillus Website collects some personal information when users register and this information is stored in a secure databas The e-mail address will be used to send confirmation of your username and password, and will be used to send you emails containing details of our new additions and updates. If you email us to ask a question, report a fault etc, we will only use the person…	Addressed (Web='e Aspergillus Website collects some personal information when users register and this information is stored in a secure databas The e-mail address will be used to send confirmation of your username and password, and will be used to send you emails containing details of our new additions and updates. If you email us to ask a question, report a fault etc, we will only use the person…	Addressed (Web='We collect and retain information about your transactions with us so that we can process your transactions and deal with future queries. We will use the information that we obtain for the following general purposes: to fulfill your requests for products and services, improve our services, contact you, conduct research and monitor the performance of our websites. add things to a sh…	Addressed (Web='We collect and retain information about your transactions with us so that we can process your transactions and deal with future queries. We will use the information that we obtain for the following general purposes: to fulfill your requests for products and services, improve our services, contact you, conduct research and monitor the performance of our websites. add things to a sh…	Addressed (Web=' We use information held about you in the following ways: To ensure that content from our site is presented in the most effective manner for you and for your computer To provide you with information, products or services that you request from us or which we feel may interest you, where you have consented to be contacted for such purposes. To allow you to participate in interactive…	Addressed (Web=' We use information held about you in the following ways: To ensure that content from our site is presented in the most effective manner for you and for your computer To provide you with information, products or services that you request from us or which we feel may interest you, where you have consented to be contacted for such purposes. To allow you to participate in interactive…	*	*	Addressed (App), Addressed (Web) (App=' We may use your data to: monitor, develop and improve the App and your experience; process your registration as a member and to process and administer your membership (where appropriate); process and deal with any complaints or enquiries made by or about you; investigate any suspected breach of the Terms and Conditions of use or membership Terms and Conditi…	Addressed (App), Addressed (Web) (App=' We may use your data to: monitor, develop and improve the App and your experience; process your registration as a member and to process and administer your membership (where appropriate); process and deal with any complaints or enquiries made by or about you; investigate any suspected breach of the Terms and Conditions of use or membership Terms and Conditi…	Addressed (Web='This system will record your email address and other information if volunteered to us by you. This shall be treated as proprietary and confidential. It may be used for internal review and to notify you about updates to this Poole Hospital NHS Foundation Trust website. We use Google Analytics to collect information about how people use this site. We do this to make sure it’s meetin…	Addressed (App='We may use your personal information to: (a) administer the website; (b) improve your browsing experience by personalising the website; (c) enable your use of the services available on the website; (d) send to you goods purchased via the website, and supply to you services purchased via the website; (e) send statements and invoices to you, and collect payments from you; (f) send y…	Addressed (App), Addressed (Web) (App='Data will be collected on the use of this app in order for the Department of Health to better understand drinking habits and to understand whether this application can be useful to help people cut down. It will also help inform how the application can be improved in the future', Web='When we collect this type of information, we will notify you as to why we a…	Addressed (App), Addressed (Web) (App='Data will be collected on the use of this app in order for the Department of Health to better understand drinking habits and to understand whether this application can be useful to help people cut down. It will also help inform how the application can be improved in the future', Web='When we collect this type of information, we will notify you as to why we a…	Addressed (App), Addressed (Web) (App=' in order to help the Department of Health provide services, to provide customer support and for other purposes described in full in the Change4Life privacy polic In the first instance, your address will be used to send you an email, inviting you to register with Change4Life', Web='When we collect this type of information, we will notify you as to why we are…	Addressed (App), Addressed (Web) (App=' in order to help the Department of Health provide services, to provide customer support and for other purposes described in full in the Change4Life privacy polic In the first instance, your address will be used to send you an email, inviting you to register with Change4Life', Web='When we collect this type of information, we will notify you as to why we are…	Addressed (App), Addressed (Web) (App='Data will be collected on the use of this app in order for the Department of Health to understand whether this application is useful in encouraging healthier eating habits.', Web='When we collect this type of information, we will notify you as to why we are asking for information and how this information will be used. We analyse it to see what is most effect…	Addressed (App), Addressed (Web) (App='Data will be collected on the use of this app in order for the Department of Health to understand whether this application is useful in encouraging healthier eating habits.', Web='We analyse it to see what is most effective about our site, to help us identify ways to improve it, and to make it more effective. We may also use data for other purposes, which we…	*	*	*	Addressed (Web=' The Website is a community site to which you can submit details of your health experiences for display, indexing and review. If you submit any contribution to this Website via the forum (including any text, photographs, graphics, video or audio) you agree, by submitting your contribution, to grant EMIS a perpetual, royalty-free, non-exclusive, right to modify (where reasonably ne…	Addressed (Web=' The Website is a community site to which you can submit details of your health experiences for display, indexing and review. If you submit any contribution to this Website via the forum (including any text, photographs, graphics, video or audio) you agree, by submitting your contribution, to grant EMIS a perpetual, royalty-free, non-exclusive, right to modify (where reasonably ne…	*	*	Addressed (App), Addressed (Web) (App='We collect anonymous, non-identifying, aggregate information about app usage via Flurry Analytics in order to improve the app. This does not involve collecting any personal information, such as the readings entered via this app, but instead we look at how users use the app, for example to see which areas are most popular.', Web=' requesting further services …	Addressed (App), Addressed (Web) (App='We collect anonymous, non-identifying, aggregate information about app usage via Flurry Analytics in order to improve the app. This does not involve collecting any personal information, such as the readings entered via this app, but instead we look at how users use the app, for example to see which areas are most popular.', Web=' requesting further services …	*	*	*	*	*	*	*	*	Addressed (Web=' We use personal information for a variety of business purposes, including for example, to complete transactions and bill for products and services; verify your identity; respond to your requests for service or assistance; anticipate and resolve actual and potential problems with our products and services; create and improve products and services; suggest additional or different p…	Addressed (Web='We collect information on your use of such functionality so that we can provide you with the Finerday Service and offer personalized features. to enable you to connect with other users of Finerday. We may use your name and email address to contact you from time to time and we will use your email address for security purposes to confirm that you are who you say you are. Finerday ma…	Addressed (Web=' allow access to your health Information to you for whatever purpose you require it; 4.2. allow access to your health Information by other Health Care Providers and their business associates for treatment This includes disclosing health Information for related applications that you may select in future, such as clinical laboratory reporting, electronic medical records, devices and…	Addressed (Web=' allow access to your health Information to you for whatever purpose you require it; 4.2. allow access to your health Information by other Health Care Providers and their business associates for treatment This includes disclosing health Information for related applications that you may select in future, such as clinical laboratory reporting, electronic medical records, devices and…	*
4.5a	5	1		1		Secondary uses of collected data	Addressed/Not Addressed (NA)	Pick from list depending on which policy or policies address the issue.	NA	Addressed (Web='r share it with any third party unless you have consented to this or this is so permitted by law')	Addressed (Web='r share it with any third party unless you have consented to this or this is so permitted by law')	Addressed (Web='The BHF may share your information with other entities owned by BHF that act as fundraisers for BHF, sell BHF products or provide BHF information subject to your communication preferences. where we believe it is necessary to investigate, prevent, or take action regarding illegal activities, suspected fraud, potential threats to the physical safety of any person, violations of any …	Addressed (Web='The BHF may share your information with other entities owned by BHF that act as fundraisers for BHF, sell BHF products or provide BHF information subject to your communication preferences. where we believe it is necessary to investigate, prevent, or take action regarding illegal activities, suspected fraud, potential threats to the physical safety of any person, violations of any …	Addressed (Web=' We may collect information about your computer, including where available your IP address, operating system and browser type, for system administration and to report aggregate information to our advertisers. This is statistical data about our users' browsing actions and patterns, and does not identify any individual.')	Addressed (Web=' We may collect information about your computer, including where available your IP address, operating system and browser type, for system administration and to report aggregate information to our advertisers. This is statistical data about our users' browsing actions and patterns, and does not identify any individual.')	*	*	Addressed (App), Addressed (Web) (App=' We may pass barcode scans, timestamps, IP addresses, geo-localization data and unique device identifiers associated with the usage of the Barcode RedLaser functionality to track overall usage however we will not include information personally identifying you. We may share some general statistical information about the App user base, download patterns, traff…	Addressed (App), Addressed (Web) (App=' We may pass barcode scans, timestamps, IP addresses, geo-localization data and unique device identifiers associated with the usage of the Barcode RedLaser functionality to track overall usage however we will not include information personally identifying you. We may share some general statistical information about the App user base, download patterns, traff…	Addressed (Web='This authority is under duty to protect the public funds it administers, and to this end may use the information you have provided us, within this authority for the collection of funds and the prevention and detection of fraud. It may also share this information with other bodies administering public funds solely for these purposes.')	Addressed (App='In addition, we may disclose your personal information: (a) to the extent that we are required to do so by law; (b) in connection with any legal proceedings or prospective legal proceedings; (c) in order to establish, exercise or defend our legal rights (including providing information to others for the purposes of fraud prevention and reducing credit risk); (d) to the purchaser (…	Addressed (Web='We may also use data for other purposes, which we would describe to you at the point we collect the information.')	Addressed (Web='We may also use data for other purposes, which we would describe to you at the point we collect the information.')	Addressed (Web='We may also use data for other purposes, which we would describe to you at the point we collect the information.')	Addressed (Web='We may also use data for other purposes, which we would describe to you at the point we collect the information.')	Addressed (App), Addressed (Web) (App=' the Department of Health does not share data with other organisations unless the law permits it to do so', Web='We may also use data for other purposes, which we would describe to you at the point we collect the information.')	Addressed (App), Addressed (Web) (App=' the Department of Health does not share data with other organisations unless the law permits it to do so', Web=' we do not share data with other organisations unless the law permits us to do so')	*	*	*	Addressed (Web='If you post or send offensive or inappropriate content to this Website or otherwise engage in any disruptive behaviour on the Website, and Patient.co.uk or its representatives consider such behaviour to be serious and/or repeated, Patient.co.uk may use whatever information that is available to it about you to stop any further such infringements. This may include informing relevant…	Addressed (Web='If you post or send offensive or inappropriate content to this Website or otherwise engage in any disruptive behaviour on the Website, and Patient.co.uk or its representatives consider such behaviour to be serious and/or repeated, Patient.co.uk may use whatever information that is available to it about you to stop any further such infringements. This may include informing relevant…	*	*	Addressed (Web=' We may also use your data, or permit selected third parties to use your data, to provide you with information about goods and services which may be of interest to you and we or they may contact you about these by post or telephone.')	Addressed (Web=' We may also use your data, or permit selected third parties to use your data, to provide you with information about goods and services which may be of interest to you and we or they may contact you about these by post or telephone.')	*	*	*	*	*	*	*	*	Addressed (Web='If you submit a job application or rsum, we use personal information to communicate with you and, subject to applicable law, evaluate your qualifications for employment. We may also use personal information to contact you about SmartDroid or third-party products, services, and offers that we believe you will find of interest. We may contact you by telephone, postal mail, e-mail, o…	Addressed (Web='We may be required to disclose user information pursuant to lawful requests, such as subpoenas or court orders, or in compliance with applicable laws. We do not reveal information until we have a good faith belief that an information request by law enforcement or private litigants meets applicable legal standards. Additionally, we may share account or other information when we bel…	Addressed (Web='reate limited data sets from your health Information, and disclose them for any purpose for which you may disclose a limited data set. You authorize us to enter into data use agreements on your behalf for the use of limited data sets, in accordance with any Applicable Laws and regulations; 4.5. aggregate your health Information with that of other Users, and share aggregated Inform…	Addressed (Web='reate limited data sets from your health Information, and disclose them for any purpose for which you may disclose a limited data set. You authorize us to enter into data use agreements on your behalf for the use of limited data sets, in accordance with any Applicable Laws and regulations; 4.5. aggregate your health Information with that of other Users, and share aggregated Inform…	*
4.5b						Anonymous Data	Yes/No	Pick from list depending on which policy or policies address the issue.	No	No	No	No	No	No	No	No	No	No	No	No	No	Yes	Yes	No	No	Yes	Yes	No	No	No	No	No	No	No	Yes	Yes	No	No	Yes	Yes	No	No	No	No	No	No	No	No	No
4.5c	86	1		1		The use of cookies	Addressed/Not Addressed (NA)	Pick from list depending on which policy or policies address the issue.	Addressed (Web='A cookie is a small text file passed to your computer, mobile phone or other device, through your web browser, so the website remembers who you are when you return. NAM uses Google Analytics to track how this website is used. Google Analytics uses cookies to help gather statistics on how people use this website. For example, which country the user is from, and which pages you visi…	Addressed (Web='Some parts of The Aspergillus website may use cookies for security purposes (e.g. to save the user from having to re-enter their details for every page in a section of the site). Cookies are not used to capture or store personal information for any other purpose, and all cookies are deleted as soon as a session is ended. You may choose to refuse cookies by disabling them using you…	Addressed (Web='Some parts of The Aspergillus website may use cookies for security purposes (e.g. to save the user from having to re-enter their details for every page in a section of the site). Cookies are not used to capture or store personal information for any other purpose, and all cookies are deleted as soon as a session is ended. You may choose to refuse cookies by disabling them using you…	Addressed (Web='We use three different types of cookies to help our websites work well. A cookie is a small file of letters and numbers that we may put on your computer. These cookies allow us to distinguish you from other users of the website and this helps us to provide you with a good experience when you browse our website and also allows us to improve our site. 1. Cookies that are necessary t…	Addressed (Web='We use three different types of cookies to help our websites work well. A cookie is a small file of letters and numbers that we may put on your computer. These cookies allow us to distinguish you from other users of the website and this helps us to provide you with a good experience when you browse our website and also allows us to improve our site. 1. Cookies that are necessary t…	NA	NA	*	*	Addressed (Web='Cookies are small pieces of information stored by Your browser on Your computer's hard drive. We use cookies to allow Us to understand who has seen which pages and advertisements, to determine how frequently particular pages are visited, to determine the most popular areas of the Site and generally in order to monitor usage of the Site. Most web browsers automatically accept cooki…	Addressed (Web='Cookies are small pieces of information stored by Your browser on Your computer's hard drive. We use cookies to allow Us to understand who has seen which pages and advertisements, to determine how frequently particular pages are visited, to determine the most popular areas of the Site and generally in order to monitor usage of the Site. Most web browsers automatically accept cooki…	Addressed (Web='Our website uses cookies. by using our website and agreeing to this policy, you consent to our use of cookies in accordance with the terms of this policy. A cookie is a file containing information packet that is sent by a web server to a web browser and is stored by the browser. The identifier is then sent back to the server each time the browser requests a page from the server. C…	Addressed (App='A cookie is a file containing an identifier (a string of letters and numbers) that is sent by a web server to a web browser, and stored by the browser. The identifier is then sent back to the server each time the browser requests a page from the server. This enables the web server to identify and track the web browser. We use both “session” cookies and “persistent” cookies on the …	Addressed (Web='One way is through the use of cookies. Cookies are small files of information which save and retrieve information about your visit to our site - for example, how you entered our site, how you navigated through the site, and what information was of interest to you. The cookies we use identify you merely as a number. (If you are uncomfortable regarding cookies use, please keep in mi…	Addressed (Web='One way is through the use of cookies. Cookies are small files of information which save and retrieve information about your visit to our site - for example, how you entered our site, how you navigated through the site, and what information was of interest to you. The cookies we use identify you merely as a number. (If you are uncomfortable regarding cookies use, please keep in mi…	Addressed (Web='One way is through the use of cookies. Cookies are small files of information which save and retrieve information about your visit to our site - for example, how you entered our site, how you navigated through the site, and what information was of interest to you. The cookies we use identify you merely as a number. (If you are uncomfortable regarding cookies use, please keep in mi…	Addressed (Web='One way is through the use of cookies. Cookies are small files of information which save and retrieve information about your visit to our site - for example, how you entered our site, how you navigated through the site, and what information was of interest to you. The cookies we use identify you merely as a number. (If you are uncomfortable regarding cookies use, please keep in mi…	Addressed (Web='One way is through the use of cookies. Cookies are small files of information which save and retrieve information about your visit to our site - for example, how you entered our site, how you navigated through the site, and what information was of interest to you. The cookies we use identify you merely as a number. (If you are uncomfortable regarding cookies use, please keep in mi…	Addressed (Web='Cookies are small files of information which save and retrieve information about your visit to our site - for example, how you entered our site, how you navigated through the site, and what information was of interest to you. The cookies we use identify you merely as a number.')	*	*	*	Addressed (Web='The Website uses cookies to store information on your local computer. These cookies do not contain any personal information.')	Addressed (Web='The Website uses cookies to store information on your local computer. These cookies do not contain any personal information.')	*	*	Addressed (Web=' For the same reason, we may obtain information about your general internet usage by using a cookie file. Cookies are small text files that are placed on your computer by websites that you visit. They therefore contain information that is transferred to your device, such as computer hard disk or mobile phone.')	Addressed (Web=' For the same reason, we may obtain information about your general internet usage by using a cookie file. Cookies are small text files that are placed on your computer by websites that you visit. They therefore contain information that is transferred to your device, such as computer hard disk or mobile phone.')	*	*	*	*	*	*	*	*	Addressed (Web=' We may use cookies (small data text files placed on your computer or device) or similar technologies to identify the computer or device and record your preferences and other data so that our Web sites can personalize your visit(s). We may also use information collected from cookies to improve our sites, make recommendations, and complete transactions you request. We may also use …	Addressed (Web='Cookies allow us to store and retrieve login information on a user's system. They provide us with data that we can use to improve the quality of our service and make it easier to use.')	Addressed (Web='Each time you visit one of the third party websites hyperlinked and/or referenced, FolUp collects the limited information that your browser makes available whenever you visit the Website. Additionally, FolUp may place internet "cookies" on the computer hard drives of visitors to this Website. Information FolUp obtains from cookies helps us to tailor our Website to be more helpful …	Addressed (Web='Each time you visit one of the third party websites hyperlinked and/or referenced, FolUp collects the limited information that your browser makes available whenever you visit the Website. Additionally, FolUp may place internet "cookies" on the computer hard drives of visitors to this Website. Information FolUp obtains from cookies helps us to tailor our Website to be more helpful …	*
4.6a	6	1		1		Consequences of not providing or sharing data	Addressed/Not Addressed (NA)	Pick from list depending on which policy or policies address the issue.	Addressed (Web='Refusing cookies, however, can restrict your use of websites. To enjoy the website to the full we recommend you leave cookies switched on.')	NA	NA	Addressed (Web='It would be impossible to use our online shop without cookies enabled, as the shopping basket function wouldn’t work. If you would prefer not to use our website, you can order goods by phone.')	Addressed (Web='It would be impossible to use our online shop without cookies enabled, as the shopping basket function wouldn’t work. If you would prefer not to use our website, you can order goods by phone.')	NA	NA	*	*	NA	NA	NA	Addressed (App='Most browsers allow you to reject all cookies, whilst some browsers allow you to reject just third party cookies. For example, in Internet Explorer you can refuse all cookies by clicking "Tools", "Internet Options", "Privacy", and selecting "Block all cookies" using the sliding selector. Blocking all cookies will, however, have a negative impact upon the usability of many websites…	NA	NA	NA	NA	NA	NA	*	*	*	NA	NA	*	*	NA	NA	*	*	*	*	*	*	*	*	NA	Addressed (Web='However, you may not be able to take full advantage of our web site if you do so.')	NA	NA	*
4.7a	7	1		1		Special procedures for handling data for vulnerable users	Addressed/Not Addressed (NA)	Pick from list depending on which policy or policies address the issue.	NA	NA	NA	NA	NA	NA	NA	*	*	NA	NA	NA	NA	NA	NA	NA	NA	NA	NA	*	*	*	Addressed (Web='If you're under 16 you need to get permission from a parent or guardian before providing us with any personal details.')	Addressed (Web='If you're under 16 you need to get permission from a parent or guardian before providing us with any personal details.')	*	*	NA	NA	*	*	*	*	*	*	*	*	Addressed (Web=' We do not solicit children to use our apps. If, however, you authorize a child to use our services or products by providing them a device with a SmartDroid product, any personal information associated with such use will be treated as your information in accordance with this policy. Our Web sites are not designed to attract children under the age of 13 and we do not intentionally …	Addressed (Web=' If you are under the age of 14, by joining the Finerday Service you verify that you have sought and obtained permission from your parent or legal guardian to register and become a member of the Finerday Service, and that your parent or legal guardian has given you permission to supply any personal information that we may ask for, either as part of the registration process, to com…	NA	NA	*
4.8a	8	1		1		How long data will be retained	Addressed/Not Addressed (NA)	Pick from list depending on which policy or policies address the issue.	NA	NA	NA	NA	NA	NA	NA	*	*	NA	NA	NA	Addressed (App='We may withhold such personal information to the extent permitted by law.')	NA	NA	NA	NA	NA	NA	*	*	*	NA	NA	*	*	NA	NA	*	*	*	*	*	*	*	*	Addressed (Web='We retain personal information for as long as we have a business need or as applicable laws, regulations, or government orders require.')	NA	NA	NA	*
4.8b	9	1		1		Procedures for subject access requests	Addressed/Not Addressed (NA)	Pick from list depending on which policy or policies address the issue.	Addressed (Web='You can ask us what information we hold about you.')	NA	NA	NA	NA	Addressed (Web=' The Act gives you the right to access information held about you. Your right of access can be exercised in accordance with the Act. Any access request may be subject to a fee of �10 to meet our costs in providing you with details of the information we hold about you.')	Addressed (Web=' The Act gives you the right to access information held about you. Your right of access can be exercised in accordance with the Act. Any access request may be subject to a fee of �10 to meet our costs in providing you with details of the information we hold about you.')	*	*	NA	NA	NA	Addressed (App='You may instruct us to provide you with any personal information we hold about you. Provision of such information will be subject to: (a) the payment of a fee currently fixed at £30.00; and (b) the supply of appropriate evidence of your identity (for this purpose, we will usually accept a photocopy of your passport certified by a solicitor or bank plus an original copy of a utilit…	NA	NA	NA	NA	NA	NA	*	*	*	NA	NA	*	*	Addressed (Web='. The Act gives you the right to access information held about you. Your right of access can be exercised in accordance with the Act. Any access request may be subject to a fee of £10 to meet our costs in providing you with details of the information we hold about you. supporterservices@diabetes.org.uk or Diabetes UK, Macleod House, 10 Parkway, London NW1 7AA')	Addressed (Web='. The Act gives you the right to access information held about you. Your right of access can be exercised in accordance with the Act. Any access request may be subject to a fee of £10 to meet our costs in providing you with details of the information we hold about you. supporterservices@diabetes.org.uk or Diabetes UK, Macleod House, 10 Parkway, London NW1 7AA')	*	*	*	*	*	*	*	*	Addressed (Web=' You may access and modify your contact information by contacting Customer Service.')	NA	Addressed (Web='. establish whether any third party, including a Health Care Provider, holds personal Information of the User and to request access to such personal Informatio')	Addressed (Web='. establish whether any third party, including a Health Care Provider, holds personal Information of the User and to request access to such personal Informatio')	*
4.8c						Procedures for editing data held by developers/third parties	Automatic		Addressed (Web='You can ask us what information we hold about you by contacting us Please keep your information up to date by letting us know of any changes.')	Addressed (Web='Users can securely log in to their personal account page to view what data is held on them, and then have the facility to edit or delete their own record.')	Addressed (Web='Users can securely log in to their personal account page to view what data is held on them, and then have the facility to edit or delete their own record.')	Addressed (Web='You can edit your BHF account Information, including your address and contact details at any time. You cannot directly change the name, address, contact details and other details of existing orders, but can contact the BHF to change order details if you need to.')	Addressed (Web='You can edit your BHF account Information, including your address and contact details at any time. You cannot directly change the name, address, contact details and other details of existing orders, but can contact the BHF to change order details if you need to.')	*	*	*	*	Addressed (App), Yes (Web) (App='Access to &amp; Updating Your Data Where You are a Member, You may access Your Data contained in Your Member Account via the "My Profile" section of the App.', Web=' You may access and update Your Data contained in Your Member Account accessed by the "My Profile" tab. You must make sure that You update Your Data as soon as possible with any and all relevant change…	Addressed (App), Yes (Web) (App='Access to &amp; Updating Your Data Where You are a Member, You may access Your Data contained in Your Member Account via the "My Profile" section of the App.', Web=' You may access and update Your Data contained in Your Member Account accessed by the "My Profile" tab. You must make sure that You update Your Data as soon as possible with any and all relevant change…	*	Addressed (App='Please let us know if the personal information which we hold about you needs to be corrected or updated.')	Addressed (Web='You are entitled to know whether we hold information about you and, if we do, to have access to that information and require it to be corrected if it is inaccurate.')	Addressed (Web='You are entitled to know whether we hold information about you and, if we do, to have access to that information and require it to be corrected if it is inaccurate.')	Addressed (Web='You are entitled to know whether we hold information about you and, if we do, to have access to that information and require it to be corrected if it is inaccurate.')	Addressed (Web='You are entitled to know whether we hold information about you and, if we do, to have access to that information and require it to be corrected if it is inaccurate.')	Addressed (Web='You are entitled to know whether we hold information about you and, if we do, to have access to that information and require it to be corrected if it is inaccurate.')	*	*	*	*	Addressed (Web=' You can retrieve, change or delete the details you place with us')	Addressed (Web=' You can retrieve, change or delete the details you place with us')	*	*	*	*	*	*	*	*	*	*	*	*	Addressed (Web='n You may access and modify your contact information by contacting Customer Service. We will make good faith efforts to resolve requests to correct inaccurate information except where the request is unreasonable, requires disproportionate technical effort or expense, jeopardizes the privacy of others, or would be impractical')	Addressed (Web='n You can review and revise your personal information, and who will be given access to your personal information, at any ti')	Addressed (Web='request where necessary, the correction, destruction or deletion of his/her personal Information, by contacting FolUp in terms of 14.2')	Addressed (Web='request where necessary, the correction, destruction or deletion of his/her personal Information, by contacting FolUp in terms of 14.2')	*
4.8d	61	1		1		Procedures for deleting data held by developers/third parties	Addressed/Not Addressed (NA)	Pick from list depending on which policy or policies address the issue.	NA	Addressed (Web='Users can securely log in to their personal account page to view what data is held on them, and then have the facility to edit or delete their own record.')	Addressed (Web='Users can securely log in to their personal account page to view what data is held on them, and then have the facility to edit or delete their own record.')	NA	NA	NA	NA	*	*	NA	NA	NA	NA	NA	NA	NA	NA	NA	NA	*	*	*	Addressed (Web=' You can retrieve, change or delete the details you place with us')	Addressed (Web=' You can retrieve, change or delete the details you place with us')	*	*	NA	NA	*	*	*	*	*	*	*	*	NA	NA	Addressed (Web='. withdrawing his/her consent to the Processing of any Information supplied by the User for purposes of the Servic 14.2. If at any time, a User wishes to discontinue making use of the Website, please contact us or email us at www.folup.com following which the User’s User IDs and User account will be disabled.')	Addressed (Web='. withdrawing his/her consent to the Processing of any Information supplied by the User for purposes of the Servic 14.2. If at any time, a User wishes to discontinue making use of the Website, please contact us or email us at www.folup.com following which the User’s User IDs and User account will be disabled.')	*
4.8e				1		Procedures for opting out of data sharing	Automatic		NA	Addressed (Web='Details of how to unsubscribe from this service are present in every email. purely voluntary )	Addressed (Web='Details of how to unsubscribe from this service are present in every email. purely voluntary )	NA	NA	Addressed ('s You have the right to ask us not to process your personal data for marketing purposes We will usually inform you (before collecting your data) if we intend to use your data for such purposes or if we intend to disclose your information to any third party for such purposes. You can exercise the right at any time by contacting us at via the contact form at www.brushdj.com.', although …	Addressed ('s You have the right to ask us not to process your personal data for marketing purposes We will usually inform you (before collecting your data) if we intend to use your data for such purposes or if we intend to disclose your information to any third party for such purposes. You can exercise the right at any time by contacting us at via the contact form at www.brushdj.com.', although …	NA	NA	NA	NA	Addressed (Web=' if volunteered to us by you.)	Addressed ('You may instruct us not to process your personal information for marketing purposes. In practice, you will usually either expressly agree in advance to our use of your personal information for marketing purposes, or we will provide you with an opportunity to opt-out of the use of your personal information for marketing purposes.'Most browsers allow you to reject all cookies, whilst so…	Addressed (Web='It is completely up to you whether or not you want to provide it.)	Addressed (Web='It is completely up to you whether or not you want to provide it.)	Addressed (App), Yes (Web) (App='If you don’t wish to receive any further emails from Change4Life, you can unsubscribe via a link in this email.', Web='It is completely up to you whether or not you want to provide it.'(If you are uncomfortable regarding cookies use, please keep in mind you can disable cookies on your computer by changing the settings in preferences or options menu in your browser…	Addressed (App), Yes (Web) (App='If you don’t wish to receive any further emails from Change4Life, you can unsubscribe via a link in this email.', Web='It is completely up to you whether or not you want to provide it.'(If you are uncomfortable regarding cookies use, please keep in mind you can disable cookies on your computer by changing the settings in preferences or options menu in your browser…	Addressed (Web='It is completely up to you whether or not you want to provide it.)	Addressed (Web=' please keep in mind you can disable cookies on your computer by changing the settings in preferences or options menu in your browser It is completely up to you whether or not you want to provide it.)	NA	NA	NA	Addressed (Web='You will only receive emails that you have agreed to If you do not want to grant EMIS the rights set out above, please do not submit your contribution to the Website forum)	Addressed (Web='You will only receive emails that you have agreed to If you do not want to grant EMIS the rights set out above, please do not submit your contribution to the Website forum)	NA	NA	Addressed (' If you do not want us to use your data in this way, or to pass your details on to third parties for marketing purposes, please tick the relevant box situated on the form on which we collect your data (either on an order form or registration form). You have the right to ask us not to process your personal data for marketing purposes. We will usually inform you (before collecting your …	Addressed (' If you do not want us to use your data in this way, or to pass your details on to third parties for marketing purposes, please tick the relevant box situated on the form on which we collect your data (either on an order form or registration form). You have the right to ask us not to process your personal data for marketing purposes. We will usually inform you (before collecting your …	NA	NA	NA	NA	NA	NA	NA	NA	NA	Addressed (Web=' we generally allow you to specify in your profile settings that you do not want this to be done or to take other actions that limit the connection of this information to your profile's We do not provide contact information to third party marketers without your permissi Third party advertisers have no access to your contact information stored on Finerday unless you choose to share…	Addressed (' withdrawing his/her consent to the Processing of any Information supplied by the User for purposes of the Services. 14.2. If at any time, a User wishes to discontinue making use of the Website, please contact us or email us at www.folup.com following which the User’s User IDs and User account will be disabled.)	Addressed (' withdrawing his/her consent to the Processing of any Information supplied by the User for purposes of the Services. 14.2. If at any time, a User wishes to discontinue making use of the Website, please contact us or email us at www.folup.com following which the User’s User IDs and User account will be disabled.)	NA
4.8f	95	1		1		Technical and procedural security arrangements (e.g. anonymisation, SSL, secure servers, limited access, backup, etc)	Addressed/Not Addressed (NA)	Pick from list depending on which policy or policies address the issue.	Addressed (Web='When we collect your personal information we use strict procedures and security features to prevent unauthorised access.')	Addressed (Web=' information is stored in a secure database. All of this data is only accessible by website and database managers')	Addressed (Web=' information is stored in a secure database. All of this data is only accessible by website and database managers')	NA	NA	Addressed (Web='Where we store personal data All information you provide to us is stored on our secure server Once we have received your information, we will use strict procedures and security features to try to prevent unauthorised access.')	Addressed (Web='Where we store personal data All information you provide to us is stored on our secure server Once we have received your information, we will use strict procedures and security features to try to prevent unauthorised access.')	*	*	Addressed (Web='All the Data collected by Us is stored on a secure server. The secure server software encrypts all information You input before it is sent to Us.')	Addressed (Web='All the Data collected by Us is stored on a secure server. The secure server software encrypts all information You input before it is sent to Us.')	NA	Addressed (App='We will use the session cookies to: keep track of you whilst you navigate the website; keep track of items in your shopping basket; prevent fraud and increase website security. We may use your personal information to: (k) keep the website secure and prevent fraud; We will take reasonable technical and organisational precautions to prevent the loss, misuse or alteration of your per…	NA	NA	NA	NA	NA	Addressed (Web='We take appropriate steps to maintain the security of your data on our websites. Our intention is that this should not happen and we take measures to ensure that it does not.')	*	*	*	NA	NA	*	*	Addressed (Web=' All information you provide to us is stored on our secure servers. Any payment transactions will be encrypted using industry standard technology. Where we have given you (or where you have chosen) a password which enables you to access certain parts of our site, you are responsible for keeping this password confidential. We ask you not to share a password with anyone. Once we hav…	Addressed (Web=' All information you provide to us is stored on our secure servers. Any payment transactions will be encrypted using industry standard technology. Where we have given you (or where you have chosen) a password which enables you to access certain parts of our site, you are responsible for keeping this password confidential. We ask you not to share a password with anyone. Once we hav…	*	*	*	*	*	*	*	*	Addressed (Web=' We use a variety of physical, electronic, and procedural safeguards to protect personal information from unauthorized access, use, or disclosure while it is under our control. For instance, when you provide sensitive information (such as credit card numbers) to our Web sites, we use transmission encryption technologies like Secure Socket Layer (SSL).')	Addressed (Web='Finerday uses industry standard technology designed to help keep your personal information safe. If you have any other questions about the security of our website, please contact us.')	Addressed (Web=' FolUp is committed to taking reasonable security measures to safeguard the integrity of the Site Content and the Information supplied by a User on the Website. FolUp is committed to ensuring the privacy and integrity of Information submitted by Users of the Website. All Information of a personal nature submitted or provided by a User will be treated confidentially . Portions of t…	Addressed (Web=' FolUp is committed to taking reasonable security measures to safeguard the integrity of the Site Content and the Information supplied by a User on the Website. FolUp is committed to ensuring the privacy and integrity of Information submitted by Users of the Website. All Information of a personal nature submitted or provided by a User will be treated confidentially . Portions of t…	*
4.9a	11	1		1		Identify of data controller or responsible legal entity	Addressed/Not Addressed (NA)	Pick from list depending on which policy or policies address the issue.	NA	NA	NA	NA	NA	Addressed (Web=', the data controller is Ben Underwood.')	Addressed (Web=', the data controller is Ben Underwood.')	*	*	NA	NA	NA	NA	Addressed (App), Addressed (Web) (App='The Department of Health is the Data Controller for this app under the Data Protection Act 1998. ', Web='The Department of Health is the Data Controller for this website under the Data Protection Act 1998')	Addressed (App), Addressed (Web) (App='The Department of Health is the Data Controller for this app under the Data Protection Act 1998. ', Web='The Department of Health is the Data Controller for this website under the Data Protection Act 1998')	Addressed (App), Addressed (Web) (App='e Department of Health is the Data Controller for this app under the Data Protection Act 1998. ', Web='The Department of Health is the Data Controller for this website under the Data Protection Act 1998')	Addressed (App), Addressed (Web) (App='e Department of Health is the Data Controller for this app under the Data Protection Act 1998. ', Web='The Department of Health is the Data Controller for this website under the Data Protection Act 1998')	Addressed (App), Addressed (Web) (App='The Department of Health is the Data Controller for this app under the Data Protection Act 1998.', Web='The Department of Health is the Data Controller for this website under the Data Protection Act 1998')	Addressed (App), Addressed (Web) (App='The Department of Health is the Data Controller for this app under the Data Protection Act 1998.', Web='The Department of Health is the Data Controller for this website under the Data Protection Act 1998.')	*	*	*	NA	NA	*	*	Addressed (Web=' For the purpose of the Data Protection Act 1998 (the Act), the data controller is the British Diabetic Association (operating as Diabetes UK) of Macleod House, 10 Parkway, London NW1 7AA.')	Addressed (Web=' For the purpose of the Data Protection Act 1998 (the Act), the data controller is the British Diabetic Association (operating as Diabetes UK) of Macleod House, 10 Parkway, London NW1 7AA.')	*	*	*	*	*	*	*	*	NA	NA	NA	NA	*
4.9b	3	1		1		Legal jurisdiction governing policy	Addressed/Not Addressed (NA)	Pick from list depending on which policy or policies address the issue.	Addressed (Web='Any information we collect is stored and processed in the UK, and subject to the provisions of the Data Protection Act 1998.')	NA	NA	Addressed (Web='This policy only applies to websites owned or operated by entities in the BHF Group.')	Addressed (Web='This policy only applies to websites owned or operated by entities in the BHF Group.')	NA	NA	*	*	Addressed (Web='f compliance with UK Data Protection Laws')	Addressed (Web='f compliance with UK Data Protection Laws')	NA	Addressed (App='Information which you provide may be transferred to countries which do not have data protection laws equivalent to those in force in the European Economic Area.')	NA	NA	NA	NA	Addressed (App), (App='The Department of Health is the Data Controller for this app under the Data Protection Act 1998. your data in accordance with the Data Protection Act')	Addressed (App), (App='The Department of Health is the Data Controller for this app under the Data Protection Act 1998. your data in accordance with the Data Protection Act')	*	*	*	Addressed (Web='These Terms of Use are governed by the laws of England and you hereby consent to the exclusive jurisdiction of the English courts in all disputes arising out of or relating to the use of this Website')	Addressed (Web='These Terms of Use are governed by the laws of England and you hereby consent to the exclusive jurisdiction of the English courts in all disputes arising out of or relating to the use of this Website')	*	*	NA	NA	*	*	*	*	*	*	*	*	NA	NA	Addressed (Web=' “Applicable Laws” means all laws, rules and/or other regulations of general application, relevant to the operation of the Website, data protection and the protection of personal information, as may be in force, from time to time in South Afric')	Addressed (Web=' “Applicable Laws” means all laws, rules and/or other regulations of general application, relevant to the operation of the Website, data protection and the protection of personal information, as may be in force, from time to time in South Afric')	*
4.9c	12	1		1		Jurisdictions under which data will be processed	Addressed/Not Addressed (NA)	Pick from list depending on which policy or policies address the issue.	Addressed (Web='NAM is responsible for collecting your personal information. Any information we collect is stored and processed in the UK, and subject to the provisions of the Data Protection Act 1998. Other than as set out in this policy or as required by law, your personal information is not shared with third parties or used in any other way unless you agree.')	NA	NA	NA	NA	NA	NA	*	*	NA	NA	NA	NA	NA	NA	NA	NA	NA	NA	*	*	*	NA	NA	*	*	Addressed (Web='The data that we collect from you may be transferred to, and stored at, a destination outside the European Economic Area ("EEA"). It may also be processed by staff operating outside the EEA who work for us or for one of our suppliers.')	Addressed (Web='The data that we collect from you may be transferred to, and stored at, a destination outside the European Economic Area ("EEA"). It may also be processed by staff operating outside the EEA who work for us or for one of our suppliers.')	*	*	*	*	*	*	*	*	NA	Addressed (Web='By using Finerday, you are consenting to have your personal data transferred to and processed in the United Kingdom Where we utilize third parties for the processing of any personal information, we implement reasonable contractual and technical protections limiting the use of that information to the Finerday-specified purposes.')	NA	NA	*
4.10a	13	1		1		Complaints procedures	Addressed/Not Addressed (NA)	Pick from list depending on which policy or policies address the issue.	NA	Addressed (Web='If you have any concerns about the use of your personal data on this website, please contact aspergillus@manchester.ac.')	Addressed (Web='If you have any concerns about the use of your personal data on this website, please contact aspergillus@manchester.ac.')	NA	NA	Addressed (Web='Contact Questions, comments and requests regarding this privacy policy are welcomed and should be sent via the contact form on www.brushdj.com.')	Addressed (Web='Contact Questions, comments and requests regarding this privacy policy are welcomed and should be sent via the contact form on www.brushdj.com.')	*	*	Addressed (App), Addressed (Web) (App='If You have any comments or queries in connection with these Terms &amp; Conditions or our privacy policy, please contact Us by email at customercare@nutracheck.co.uk, or write to us stating your registered email address, name and contact details at:', Web='If You have any comments or queries in connection with Our privacy policy, please contact Us by email …	Addressed (App), Addressed (Web) (App='If You have any comments or queries in connection with these Terms &amp; Conditions or our privacy policy, please contact Us by email at customercare@nutracheck.co.uk, or write to us stating your registered email address, name and contact details at:', Web='If You have any comments or queries in connection with Our privacy policy, please contact Us by email …	NA	Addressed (App='If you have any questions about this privacy policy or our treatment of your personal information, please write to us by email to (privacy@carepair.co.uk).')	Addressed (App), (App='You can contact the Data Protection Officer at the following address: Department of Health, Skipton House, 80 London Road, London SE1 6LH.')	Addressed (App), (App='You can contact the Data Protection Officer at the following address: Department of Health, Skipton House, 80 London Road, London SE1 6LH.')	Addressed (App), (App='You can contact the Data Protection Officer at the following address: Department of Health, Skipton House, 80 London Road, London SE1 6LH.')	Addressed (App), (App='You can contact the Data Protection Officer at the following address: Department of Health, Skipton House, 80 London Road, London SE1 6LH.')	Addressed (App), (App='You can contact the Data Protection Officer at the following address: Department of Health, Skipton House, 80 London Road, London SE1 6LH.')	Addressed (App), (App='You can contact the Data Protection Officer at the following address: Department of Health, Skipton House, 80 London Road, London SE1 6LH.')	*	*	*	NA	NA	*	*	Addressed (App), Addressed (Web) (App='If you have any questions or concerns, please get in touch with us.', Web=' Questions, comments and requests regarding this privacy policy are welcomed and should be addressed to supporterservices@diabetes.org.uk or Diabetes UK, Macleod House, 10 Parkway, London NW1 7A')	Addressed (App), Addressed (Web) (App='If you have any questions or concerns, please get in touch with us.', Web=' Questions, comments and requests regarding this privacy policy are welcomed and should be addressed to supporterservices@diabetes.org.uk or Diabetes UK, Macleod House, 10 Parkway, London NW1 7A')	*	*	*	*	*	*	*	*	Addressed (Web='s If you have any questions or comments about this policy or about SmartDroid's privacy practices, please send an e-mail message to smartdroid2000@gmail.com.')	Addressed (Web='If you have any other questions about the security of our website, please contact us. If you have any questions about this Privacy Policy, please contact us at admin@finerday.com.')	Addressed (Web='Should the User have any questions on the FolUp privacy terms of use herein, please contact us at www.folup.com . submit a complaint in respect of the Processing of any Information supplied to FolUp and/or institute civil proceedings in respect of any interference with the protection of any personal Information, to any competent authority, for adjudication in terms of any Applicab…	Addressed (Web='Should the User have any questions on the FolUp privacy terms of use herein, please contact us at www.folup.com . submit a complaint in respect of the Processing of any Information supplied to FolUp and/or institute civil proceedings in respect of any interference with the protection of any personal Information, to any competent authority, for adjudication in terms of any Applicab…	*
4.10b	14	1		1		The right to complain to the Information Commissioner	Addressed/Not Addressed (NA)	Pick from list depending on which policy or policies address the issue.	NA	NA	NA	NA	NA	NA	NA	*	*	NA	NA	NA	NA	NA	NA	NA	NA	NA	NA	*	*	*	NA	NA	*	*	NA	NA	*	*	*	*	*	*	*	*	NA	NA	NA	NA	*
4.11a	96	1		1		Inherent risks or limitations of security on mobile device/internet	Addressed/Not Addressed (NA)	Pick from list depending on which policy or policies address the issue.	Addressed (Web='However, no data transmission over the Internet is 100% secure. As a result, while we try to protect your personal information, NAM cannot guarantee the security of any information you transmit to us and you do so at your own risk.')	Addressed (Web='NOTE: This is an insecure way of sending information so be careful to use non-sensitive details that cannot be misused.')	Addressed (Web='NOTE: This is an insecure way of sending information so be careful to use non-sensitive details that cannot be misused.')	NA	NA	Addressed (Web='Although we will do our best to protect your personal data, we cannot guarantee the security of your data transmitted to our site; any transmission is at your own risk.')	Addressed (Web='Although we will do our best to protect your personal data, we cannot guarantee the security of your data transmitted to our site; any transmission is at your own risk.')	*	*	NA	NA	NA	Addressed (App='Of course, data transmission over the internet is inherently insecure, and we cannot guarantee the security of data sent over the internet. You are responsible for keeping your password and user details confidential. We will not ask you for your password (except when you log in to the website).')	Addressed (Web='You should understand that the open nature of the Internet is such that data may flow over networks without security measures and may be accessed and used by people other than those for whom the data is intended. Our intention is that this should not happen and we take measures to ensure that it does not.')	Addressed (Web='You should understand that the open nature of the Internet is such that data may flow over networks without security measures and may be accessed and used by people other than those for whom the data is intended. Our intention is that this should not happen and we take measures to ensure that it does not.')	Addressed (Web='You should understand that the open nature of the Internet is such that data may flow over networks without security measures and may be accessed and used by people other than those for whom the data is intended. Our intention is that this should not happen and we take measures to ensure that it does not.')	Addressed (Web='You should understand that the open nature of the Internet is such that data may flow over networks without security measures and may be accessed and used by people other than those for whom the data is intended. Our intention is that this should not happen and we take measures to ensure that it does not.')	Addressed (Web='You should understand that the open nature of the Internet is such that data may flow over networks without security measures and may be accessed and used by people other than those for whom the data is intended. Our intention is that this should not happen and we take measures to ensure that it does not.')	Addressed (Web='You should understand that the open nature of the Internet is such that data may flow over networks without security measures and may be accessed and used by people other than those for whom the data is intended.')	*	*	*	NA	NA	*	*	Addressed (Web=' Unfortunately, the transmission of information via the internet is not completely secure. Although we will do our best to protect your personal data, we cannot guarantee the security of your data transmitted to our site; any transmission is at your own risk. Once we have received your information, we will use strict procedures and security features to try to prevent unauthorised …	Addressed (Web=' Unfortunately, the transmission of information via the internet is not completely secure. Although we will do our best to protect your personal data, we cannot guarantee the security of your data transmitted to our site; any transmission is at your own risk. Once we have received your information, we will use strict procedures and security features to try to prevent unauthorised …	*	*	*	*	*	*	*	*	Addressed (Web=' we cannot guarantee that loss, misuse, or alteration of your personal information will not occur, we strive to prevent such occurrences.')	Addressed (Web=' The security of your personal information depends on your protection of your account password. Please do not disclose your account password to unauthorized people.')	Addressed (Web=' FolUp acknowledges that a 100% secure online environment is unattainable A User is solely responsible for: 13.5.1. maintaining the strict confidentiality of any User IDs assigned to you; 13.5.2. not allowing another person to use your User IDs to access the Website; 13.5.3. any damages or losses that may be incurred or suffered as a result of ; and 13.5.4. promptly informing FolU…	Addressed (Web=' FolUp acknowledges that a 100% secure online environment is unattainable A User is solely responsible for: 13.5.1. maintaining the strict confidentiality of any User IDs assigned to you; 13.5.2. not allowing another person to use your User IDs to access the Website; 13.5.3. any damages or losses that may be incurred or suffered as a result of ; and 13.5.4. promptly informing FolU…	*
4.12a	1	1		1		Date of policy	Addressed/Not Addressed (NA)	Pick from list depending on which policy or policies address the issue.	Addressed (Web='All material that appears at www.aidsmap.com and subsections thereof is copyright © NAM Publications, 2014. All rights reserved. © NAM Publications, 2014. All rights reserved. NAM is not responsible for the content of external websites.')	Addressed (Web='Disclaimer | Privacy/Confidentiality | Cookies | Terms and Conditions | Advertising This page was created on August 30 2007 This page was last modified: February 01 2008 22:09:28. Maintained by Aspergillus Website Team')	Addressed (Web='Disclaimer | Privacy/Confidentiality | Cookies | Terms and Conditions | Advertising This page was created on August 30 2007 This page was last modified: February 01 2008 22:09:28. Maintained by Aspergillus Website Team')	NA	NA	NA	NA	*	*	NA	NA	NA	NA	NA	NA	NA	NA	NA	NA	*	*	*	NA	NA	*	*	NA	NA	*	*	*	*	*	*	*	*	Addressed (Web='2013 SmartDroid All Rights Reserved')	NA	NA	NA	*
4.12b	2	1		1		Date of next review	Addressed/Not Addressed (NA)	Pick from list depending on which policy or policies address the issue.	NA	NA	NA	NA	NA	NA	NA	*	*	NA	NA	NA	NA	NA	NA	NA	NA	NA	NA	*	*	*	NA	NA	*	*	NA	NA	*	*	*	*	*	*	*	*	NA	NA	NA	NA	*
4.13a	15	1		1		Procedures for changing the terms of the policy	Addressed/Not Addressed (NA)	Pick from list depending on which policy or policies address the issue.	NA	NA	NA	Addressed (Web='The BHF Group may update this policy at any time. We will notify you about significant changes in the way we treat personal information by sending a notice to the primary email address you have provided to us or by placing a prominent notice on our website(s).')	Addressed (Web='The BHF Group may update this policy at any time. We will notify you about significant changes in the way we treat personal information by sending a notice to the primary email address you have provided to us or by placing a prominent notice on our website(s).')	Addressed (Web='Changes to our privacy policy Any changes we may make to our privacy policy in the future will be posted on this page and, where appropriate, notified to you by e-mai')	Addressed (Web='Changes to our privacy policy Any changes we may make to our privacy policy in the future will be posted on this page and, where appropriate, notified to you by e-mai')	*	*	NA	NA	NA	Addressed (App='We may update this privacy policy from time-to-time by posting a new version on our website. You should check this page occasionally to ensure you are happy with any changes. We may also notify you of changes to our privacy policy by email.')	Addressed (App), (App='This privacy policy may be subject to change. For the latest version, visit the Change4Life privacy policy pages.')	Addressed (App), (App='This privacy policy may be subject to change. For the latest version, visit the Change4Life privacy policy pages.')	Addressed (App), (App='This privacy policy may be subject to change. For the latest version, visit the Change4Life privacy policy pages.')	Addressed (App), (App='This privacy policy may be subject to change. For the latest version, visit the Change4Life privacy policy pages.')	Addressed (App), (App='This privacy policy may be subject to change. For the latest version, visit the Change4Life privacy policy pag')	Addressed (App), (App='This privacy policy may be subject to change. For the latest version, visit the Change4Life privacy policy pag')	*	*	*	NA	NA	*	*	Addressed (App), Addressed (Web) (App='We reserve the right to change this policy at any time, so please feel free to check this periodically.', Web=' Any changes we may make to our privacy policy in the future will be posted on this page and, where appropriate, notified to you by e-mail.')	Addressed (App), Addressed (Web) (App='We reserve the right to change this policy at any time, so please feel free to check this periodically.', Web=' Any changes we may make to our privacy policy in the future will be posted on this page and, where appropriate, notified to you by e-mail.')	*	*	*	*	*	*	*	*	Addressed (Web=' We may update this policy if we materially change our practices or if legal or regulatory changes require it. If we decide to use or disclose personal information in a way that is materially different from that which was stated in this policy at the time the personal information was collected, we will notify you by posting notice of the change on our Web site's home page for at l…	Addressed (Web='If we do this, we will post the changes to this Privacy Policy on this page and will indicate at the top of this page the Privacy Policy's effective date. Your continued use of the Finerday Service after any such changes constitutes your acceptance of the new Privacy Policy. It is your responsibility to regularly review this Privacy Policy.')	Addressed (Web='As such, you are encouraged to familiarise yourself with the Terms and Conditions each time when using this Website as such Terms and Conditions may have changed from your last visit .')	Addressed (Web='As such, you are encouraged to familiarise yourself with the Terms and Conditions each time when using this Website as such Terms and Conditions may have changed from your last visit .')	*
4.13b	16	1		1		If 4.13a APP, WEB or BOTH, can the developer change the policy with no notice?	Addressed/Not Addressed (NA)	Pick from list depending on which policy or policies address the issue.	NA	NA	NA	Addressed (Web='The BHF Group may update this policy at any time.')	Addressed (Web='The BHF Group may update this policy at any time.')	NA	NA	*	*	NA	NA	NA	NA	NA	NA	Addressed (App), (App='This privacy policy may be subject to change. For the latest version, visit the Change4Life privacy policy page')	Addressed (App), (App='This privacy policy may be subject to change. For the latest version, visit the Change4Life privacy policy page')	NA	NA	*	*	*	Addressed (Web=' changes in this Website at any time General EMIS reserves the right to change the terms, conditions, and notices under which this Website is offer')	Addressed (Web=' changes in this Website at any time General EMIS reserves the right to change the terms, conditions, and notices under which this Website is offer')	*	*	NA	NA	*	*	*	*	*	*	*	*	NA	Addressed (Web=' We reserve the right, at our sole discretion, to change, modify, add, or delete portions of this Privacy Policy at any time without further notice.')	NA	NA	*
4.14a	55	1		2		Anything suprising?	Yes/No	Pick from list depending on which policy or policies address the issue.	No	Yes (Web=' dedicated partner service – see their privacy policy at http://www.yourmailinglistprovider.com/privacy_policy.ht')	Yes (Web=' dedicated partner service – see their privacy policy at http://www.yourmailinglistprovider.com/privacy_policy.ht')	No	No	No	No	*	*	Yes (App), Yes (Web) (App='If you do not agree to be bound by these Terms and Conditions, you should uninstall the software. If you are dissatisfied with any portion of Nutracheck, or with any of provision of these Terms &amp; Conditions, your sole and exclusive remedy is to cease using the app and to uninstall the software Data transfer charges depend upon the service agreement you have with you…	Yes (App), Yes (Web) (App='If you do not agree to be bound by these Terms and Conditions, you should uninstall the software. If you are dissatisfied with any portion of Nutracheck, or with any of provision of these Terms &amp; Conditions, your sole and exclusive remedy is to cease using the app and to uninstall the software Data transfer charges depend upon the service agreement you have with you…	No	Yes (App='Information which you provide may be transferred to countries which do not have data protection laws equivalent to those in force in the European Economic Area. You may instruct us to provide you with any personal information we hold about you. Provision of such information will be subject to: (a) the payment of a fee currently fixed at £30.00; and')	Yes (App), (App='All of this data is anonymous and cannot be traced back to an individual.', Web='You should understand that the open nature of the Internet is such that data may flow over networks without security measures and may be accessed and used by people other than those for whom the data is intended.')	Yes (App), (App='All of this data is anonymous and cannot be traced back to an individual.', Web='You should understand that the open nature of the Internet is such that data may flow over networks without security measures and may be accessed and used by people other than those for whom the data is intended.')	No	No	Yes (App), (App='All of this data is anonymous and cannot be traced back to an individual.', Web='You should understand that the open nature of the Internet is such that data may flow over networks without security measures and may be accessed and used by people other than those for whom the data is intended.')	Yes (App), Yes (Web) (App='All of this data is anonymous and cannot be traced back to an individual.', Web='When visiting pages that display a Facebook Like button, information relating to the date and time of your visit, the web page you are on (commonly known as the URL) and other technical information about the IP address, browser and operating system you use will be collected by Facebook. If …	*	*	*	Yes (Web=' you agree, by submitting your contribution, to grant EMIS a perpetual, royalty-free, non-exclusive, right to modify (where reasonably necessary to allow publication) and publish the contribution on the Website.')	Yes (Web=' you agree, by submitting your contribution, to grant EMIS a perpetual, royalty-free, non-exclusive, right to modify (where reasonably necessary to allow publication) and publish the contribution on the Website.')	*	*	Yes (App), Yes (Web) (App='We reserve the right to change this policy at any time, so please feel free to check this periodically. Your continued use of the app following the posting of any changes to this policy will mean you accept those changes', Web=' The data that we collect from you may be transferred to, and stored at, a destination outside the European Economic Area ("EEA").')	Yes (App), Yes (Web) (App='We reserve the right to change this policy at any time, so please feel free to check this periodically. Your continued use of the app following the posting of any changes to this policy will mean you accept those changes', Web=' The data that we collect from you may be transferred to, and stored at, a destination outside the European Economic Area ("EEA").')	*	*	*	*	*	*	*	*	Yes (Web='For example, our systems capture details about the type and location of wireless device(s) you use, calls and text messages you send and receive, and other data services you use (for example your ringtone purchases). We may also obtain personal information about you from other sources. For example, we may obtain updated address information from our shippers or other vendors. We may also…	Yes (Web='Third party advertisers have no access to your contact information stored on Finerday unless you choose to share it with them Finerday uses industry standard technology designed to help keep your personal information safe.')	Yes (Web='1.7. “Information” means personal information, namely information relating to an identifiable, living, natural person, and where it is applicable, an identifiable, existing juristic person, including, but not limited to: 1.7.1. information relating to the race, gender, sex, pregnancy, marital status, national, ethnic or social origin, colour, sexual orientation, age, physical or mental …	Yes (Web='1.7. “Information” means personal information, namely information relating to an identifiable, living, natural person, and where it is applicable, an identifiable, existing juristic person, including, but not limited to: 1.7.1. information relating to the race, gender, sex, pregnancy, marital status, national, ethnic or social origin, colour, sexual orientation, age, physical or mental …	*
						Other policies (advertising policy is dealt with separately)
4.15a						Is there a clinical disclaimer in the app?	Yes/No	Pick Yes if a clinical disclaimer is supplied with the app	No	Yes	Yes	Yes	Yes	Yes	Yes	No	No	Yes	Yes	No	No	Yes	Yes	No	No	No	No	Yes	Yes	Yes	Yes	Yes	Yes	Yes	No	No	Yes	Yes	Yes	Yes	No	No	No	No	No	No	Yes	Yes	No
4.15b						If 4.15a YES, what is the filename of the extracted disclaimer.	Text	Download and save the disclaimer and review it, making notes as appropriate.		4502.8.txt	4503.8.html	4504.8.txt	4505.8.txt	4507.8.html	4507.8.html			4511.2.html	4511.2.html			4515.html	4515.html					4520.8.txt	4522.8.html	4522.8.html	4621.html	4524.8.txt	4526.4.html	4526.4.html			4529_1.8.txt	4530.8.html	4531.8.html	4532.8.html							4540.html	4540.html
4.15c	54	8		2		If 4.15a YES, what is the disclaimer text?	Text	Type the main text of the disclaimer.		Yes ('The FIT cannot be held liable for any advice, course of treatment, diagnosis of any other information you obtain through using this APP.')	Yes ('The FRT cannot be held liable for any advice, course of treatment, diagnosis or any other information you obtain through using this APP. Always consult your own medical practitioner for medical advice.')	Yes ('It is your responsibility to check recipes to ensure that no ingredients or combination of ingredients is likely to be inappropriate for your diet. This tool does not replace advice given by your doctor or dietician.')	Yes ('It is your responsibility to check recipes to ensure that no ingredients or combination of ingredients is likely to be inappropriate for your diet. This tool does not replace advice given by your doctor or dietician.')	Yes ('The information on this app is intended to supplement, not be a substitute for, the expertise and judgement of your dentist, hygienist, doctor or other healthcare professional.')	Yes ('The information on this app is intended to supplement, not be a substitute for, the expertise and judgement of your dentist, hygienist, doctor or other healthcare professional.')	*	*	Yes ('Nutracheck is intended as a weight management tool to assist users in their personal weight loss aspirations. NutraTech Ltd is not a medical organisation and we cannot give you medical advice or diagnosis. Any information contained within the Nutracheck Mobile App should not be construed as advice or diagnosis. You are advised to seek medical advice before beginning any weight loss programm…	Yes ('Nutracheck is intended as a weight management tool to assist users in their personal weight loss aspirations. NutraTech Ltd is not a medical organisation and we cannot give you medical advice or diagnosis. Any information contained within the Nutracheck Mobile App should not be construed as advice or diagnosis. You are advised to seek medical advice before beginning any weight loss programm…	*	*	Yes ('Medical Warning: If you have physical withdrawal symptoms (like shaking, sweating or feeling anxious until you have a first drink of the day), you should take medical advice before stopping completely – as it can be dangerous to do this too quickly without proper advice and support. Disclaimer: This app is designed to be used as a guide to help you reduce your health risks in relation to dr…	Yes ('Medical Warning: If you have physical withdrawal symptoms (like shaking, sweating or feeling anxious until you have a first drink of the day), you should take medical advice before stopping completely – as it can be dangerous to do this too quickly without proper advice and support. Disclaimer: This app is designed to be used as a guide to help you reduce your health risks in relation to dr…	*	*	*	*	Yes ('The Authors provide the Apps, associated website and the services, information, content and/or data (collectively "Information") contained therein for informational purposes only. Information provided by the App or associated website, is not intended to create a physician-patient relationship, or to replace the services or medical advice of a registered medical practitioner or health profes…	Yes ('Dentify© has been designed to take into account acute dental problems and provide temporary advice until a consultation with a dental healthcare professional can be arranged. All content within Dentify© is provided for general information. It should only be used as a guidance tool for patients to manage acute dental problems, and does not replace the need to see a dental healthcare professi…	Yes ('Dentify© has been designed to take into account acute dental problems and provide temporary advice until a consultation with a dental healthcare professional can be arranged. All content within Dentify© is provided for general information. It should only be used as a guidance tool for patients to manage acute dental problems, and does not replace the need to see a dental healthcare professi…	Yes ('he Website also contains content generated by medical authors. This information is not a substitute for professional medical care by a qualified doctor or other health care professional. ALWAYS check with your doctor if you have any concerns about your condition or treatment. Patient.co.uk is not responsible or liable, directly or indirectly, for ANY form of damages whatsoever resulting fro…	Yes ('he Website also contains content generated by medical authors. This information is not a substitute for professional medical care by a qualified doctor or other health care professional. ALWAYS check with your doctor if you have any concerns about your condition or treatment. Patient.co.uk is not responsible or liable, directly or indirectly, for ANY form of damages whatsoever resulting fro…	Yes ('By using this app, you accept that it is neither a diagnosis nor assessment tool. We accept no responsibility for clinical use or misuse of this app.')	Yes ('By using this app, you accept that it is neither a diagnosis nor assessment tool. We accept no responsibility for clinical use or misuse of this app.')	*	*	Yes ('Dr iSeb Travel iClinic application cannot accept liability for injury, loss or illness occuring whilst travelling.')	Yes ('If you have physical withdrawal symptoms (like shaking, sweating or feeling anxious until you have a first drink of the day), you should take medical advice before stopping drinking alcohol completely – as it can be dangerous without proper advice and support. DrinkCoach is designed as a guide to help reduce your health risks in relation to drinking. DrinkCoach will not suit everyone and if…	Yes (': the irresponsible use of alcohol can seriously damage your health Under age drinking and drink driving is illegal in most countries and can carry a significant risk of harm')	No	*	*	*	*	*	*	Yes ('Information on FolUp.com does not replace medical advice and direct contact with your physician.')	Yes ('Information on FolUp.com does not replace medical advice and direct contact with your physician.')	*
4.15d	53	8		2		If 4.15a YES, does the disclaimer address any privacy issues?	Yes/No	Quote any appropriate text from the disclaimer.		No	No	No	No	No	No	*	*	Yes ('We take the privacy rights of users of the Service very seriously and seek to ensure the highest standards of compliance with Data Protection Laws and Regulations. This Privacy Policy is incorporated in and subject to the Site Terms and Conditions. This Privacy Policy explains to You use of the Website. You expressly consent to the use of Your Data in accordance with this Privacy Policy. a.…	Yes ('We take the privacy rights of users of the Service very seriously and seek to ensure the highest standards of compliance with Data Protection Laws and Regulations. This Privacy Policy is incorporated in and subject to the Site Terms and Conditions. This Privacy Policy explains to You use of the Website. You expressly consent to the use of Your Data in accordance with this Privacy Policy. a.…	*	*	Yes ('The purpose of this privacy policy is to inform you as a user about what information we collect when you use this app, how we use the information, whether the information is disclosed and the ways in which we protect users' privacy.')	Yes ('The purpose of this privacy policy is to inform you as a user about what information we collect when you use this app, how we use the information, whether the information is disclosed and the ways in which we protect users' privacy.')	*	*	*	*	No	No	No	Yes ('Collection of Personal Data If you register to use the Website discussion forum and/or the MyHealth Services then Patient.co.uk may collect personal data about you, including without limitation your name, nickname, age, medical conditions and a valid email address from you when you register to use these services on the Website. This data will be held in confidence solely for the purpose of …	Yes ('Collection of Personal Data If you register to use the Website discussion forum and/or the MyHealth Services then Patient.co.uk may collect personal data about you, including without limitation your name, nickname, age, medical conditions and a valid email address from you when you register to use these services on the Website. This data will be held in confidence solely for the purpose of …	Yes ('The data collected by this app is used only for the purposes of performing the calculation, and is not saved or shared with anyone.')	Yes ('The data collected by this app is used only for the purposes of performing the calculation, and is not saved or shared with anyone.')	*	*	No	No	No	No	*	*	*	*	*	*	Yes ('We understand the importance of protecting Users from the unauthorised use of Information provided in the course of making use of the Website. 3.2. The User, by submitting any Information on the Website: 3.2.1. acknowledges that such conduct constitutes an unconditional and voluntary consent to the Processing of such Information by FolUp, which consent shall, in the absence of any objection…	Yes ('We understand the importance of protecting Users from the unauthorised use of Information provided in the course of making use of the Website. 3.2. The User, by submitting any Information on the Website: 3.2.1. acknowledges that such conduct constitutes an unconditional and voluntary consent to the Processing of such Information by FolUp, which consent shall, in the absence of any objection…	*
Local app behaviour
						Can the app request or store any of the following information from the user?
5.1a					Identifying Information (Weaker)	Name (First or Unspecified)	Yes/No	Choose Yes if the item is requested or can be stored by the app.	No	No	No	No	No	No	No	No	No	Registration	Registration	No	No	No	No	No	No	No	No	No	No	No	No	No	No	No	No	No	No	No	No	No	No	No	No	No	No	App	No	No	No
5.1b					Identifying Information (Strong)	Full Name	Yes/No	Choose Yes if the item is requested or can be stored by the app.	No	No	No	No	No	No	No	No	No	No	No	No	Online Registration	No	No	No	No	No	No	No	No	No	No	No	No	No	No	No	No	No	No	No	No	No	No	No	No	Registration, App	No	No	No
5.2a					Identifying Information (Weaker)	Age or Year of Birth	Yes/No	Choose Yes if the item is requested or can be stored by the app.	No	No	No	No	No	No	No	No	No	Registration	Registration	No	No	Registration, App	Registration, App	No	No	No	No	No	No	No	No	No	App	App	App	App	No	No	App	App	No	No	No	No	No	No	No	No	No
5.2b					Identifying Information (Strong)	Date of Birth	Yes/No	Choose Yes if the item is requested or can be stored by the app.	No	No	No	No	No	No	No	No	No	No	No	No	Online Registration	No	No	No	No	No	No	No	No	No	No	No	No	No	No	No	No	No	No	No	No	No	No	No	No	Registration, App	No	No	No
5.3					Identifying Information (Weaker)	Gender	Yes/No	Choose Yes if the item is requested or can be stored by the app.	No	No	No	No	No	No	No	No	No	Registration	Registration	No	No	Registration, App	Registration, App	No	No	No	No	No	No	No	No	No	App	App	App	App	No	No	App	App	No	No	No	No	No	Registration, App	No	No	No
5.4					Sensitive Information (Other)	Ethnicity	Yes/No	Choose Yes if the item is requested or can be stored by the app.	No	No	No	No	No	No	No	No	No	No	No	No	No	No	No	No	No	No	No	No	No	No	No	No	App	App	No	No	No	No	No	No	No	No	No	No	No	No	No	No	No
5.5					Sensitive Information (Other)	Sexuality	Yes/No	Choose Yes if the item is requested or can be stored by the app.	No	No	No	No	No	No	No	No	No	No	No	No	No	No	No	No	No	No	No	No	No	No	No	No	No	No	No	No	No	No	App	App	No	No	No	No	No	No	No	No	No
5.6					Sensitive Information (Other)	Political Affiliation	Yes/No	Choose Yes if the item is requested or can be stored by the app.	No	No	No	No	No	No	No	No	No	No	No	No	No	No	No	No	No	No	No	No	No	No	No	No	No	No	No	No	No	No	No	No	No	No	No	No	No	No	No	No	No
5.7					Sensitive Information (Other)	Religious Beliefs	Yes/No	Choose Yes if the item is requested or can be stored by the app.	No	No	No	No	No	No	No	No	No	No	No	No	No	No	No	No	No	No	No	No	No	No	No	No	No	No	No	No	No	No	No	No	No	No	No	No	No	No	No	No	No
5.8					Sensitive Information (Other)	Employment Status	Yes/No	Choose Yes if the item is requested or can be stored by the app.	No	No	No	No	No	No	No	No	No	No	No	No	No	No	No	No	No	No	No	No	No	No	No	No	No	No	No	No	No	No	App	App	No	No	No	No	No	No	No	No	No
5.9					Sensitive Information (Medical)	Disability Status	Yes/No	Choose Yes if the item is requested or can be stored by the app.	No	No	No	No	No	No	No	No	No	No	No	No	No	No	No	No	No	No	No	No	No	No	No	No	No	No	No	No	No	No	No	No	No	No	No	No	No	No	No	No	No
5.10a					Identifying Information (Strong)	Postal Address	Yes/No	Choose Yes if the item is requested or can be stored by the app.	No	No	No	No	No	No	No	No	No	No	No	No	Online Registration	No	No	No	No	No	No	No	No	No	No	No	No	No	No	No	No	No	App	App	No	No	No	No	No	No	No	No	No
5.10b					Identifying Information (Strong)	Full Postcode	Yes/No	Choose Yes if the item is requested or can be stored by the app.	No	No	No	No	No	No	No	No	No	No	No	No	Online Registration	No	No	No	No	No	No	No	No	No	No	No	No	No	No	No	No	No	App	App	No	No	No	No	No	No	No	No	No
5.10c					Identifying Information (Weaker)	Country or Area or Partial Postcode	Yes/No	Choose Yes if the item is requested or can be stored by the app.	No	No	No	No	No	No	No	No	No	No	No	No	Online Registration	No	No	No	No	No	No	No	No	No	No	No	No	No	No	No	No	No	App	App	No	No	No	No	No	Registration, App	No	No	No
5.10d					Identifying Information (Weaker)	Geolocation	Yes/No	Choose Yes if the item is requested or can be stored by the app.	No	No	No	No	No	No	No	No	No	No	No	No	No	No	No	No	No	No	No	No	No	No	No	No	No	No	No	No	No	No	No	No	No	No	No	No	App	No	No	No	No
5.10e					Identifying Information (Strong)	Email Address	Yes/No	Choose Yes if the item is requested or can be stored by the app.	No	No	No	No	No	No	No	No	No	Registration	Registration	No	Online Registration	No	No	Registration	Registration	Registration	Registration	No	No	No	No	No	No	No	App	App	No	No	No	No	No	No	No	No	No	No	No	No	No
5.10f					Identifying Information (Strong)	Telephone Numbers	Yes/No	Choose Yes if the item is requested or can be stored by the app.	No	No	No	No	No	No	No	No	No	No	No	No	Online Registration	No	No	No	No	No	No	No	No	No	No	No	No	No	No	No	No	No	No	No	No	No	No	No	No	No	No	No	No
5.11a					Identifying Information (Strong)	Username	Yes/No	Choose Yes if the item is requested or can be stored by the app.	No	No	No	No	No	No	No	No	No	No	No	No	Online Registration	No	No	No	No	No	No	No	No	No	No	No	No	No	No	No	No	No	No	No	No	No	No	No	No	Registration, Logon	No	No	No
5.11b					Identifying Information (Strong)	Password	Yes/No	Choose Yes if the item is requested or can be stored by the app.	No	No	No	No	No	No	No	No	No	Registration	Registration	No	Online Registration	No	No	No	No	No	No	No	No	No	No	App (PIN)	No	No	No	No	No	No	No	No	No	No	No	No	No	Registration, Logon	No	No	No
5.13a					Identifying Information (Strong)	Medical System Numbers	Yes/No	Choose Yes if the item is requested or can be stored by the app.	No	No	No	No	No	No	No	No	No	No	No	No	No	No	No	No	No	No	No	App (Hospital and Insurance Numbers)	No	No	No	No	No	No	No	No	No	No	No	No	No	No	No	No	No	No	No	No	No
5.13b					Identifying Information (Strong)	Social Security Number	Yes/No	Choose Yes if the item is requested or can be stored by the app.	No	No	No	No	No	No	No	No	No	No	No	No	No	No	No	No	No	No	No	No	No	No	No	No	No	No	No	No	No	No	No	No	No	No	No	No	No	No	No	No	No
5.14					Other Information	Hobbies and Interests	Yes/No	Choose Yes if the item is requested or can be stored by the app.	No	No	No	No	No	No	No	No	No	No	No	No	Online Registration	No	No	No	No	No	No	No	No	No	No	No	No	No	No	No	No	No	No	No	No	No	No	No	No	No	No	No	No
5.15a					Sensitive Information (Measurements)	Measured Health Parameters	Yes/No	Choose Yes if the item is requested or can be stored by the app.	No	No	No	No	No	No	No	No	No	Registration (Height, Weight), App (Calorie Intake, Weight)	Registration (Height, Weight), App (Calorie Intake, Weight)	App (Personal)	No	No	No	No	No	No	No	No	No	No	No	Registration (Normal Ranges BG, A1C), App (BG, BP)	App	App	App (BG, Weight, Food Intake, Insulin Use)	App (BG, Weight, Food Intake, Insulin Use)	No	App (Alcohol Craving Duration and Intensity)	No	No	No	No	No	No	No	No	No	No	No
5.15b					Sensitive Information (Medical)	Medical History	Yes/No	Choose Yes if the item is requested or can be stored by the app.	No	No	No	No	No	No	No	No	No	Registration (Pregnant, Breasfteeding)	Registration (Pregnant, Breasfteeding)	No	No	No	No	No	No	No	No	App (Diagnoses, Proposed Treatments)	No	No	No	Registration (Diabetes Type), App (Hypo episodes)	App (Personal and Family)	App (Personal and Family)	App (Personal)	App (Personal)	No	No	App (Personal and Family)	App (Personal and Family)	App (Seizures)	No	No	No	No	No	No	No	No
5.15c					Sensitive Information (Medical)	HIV Status	Yes/No	Choose Yes if the item is requested or can be stored by the app.	No	No	No	No	No	No	No	No	No	No	No	No	No	No	No	No	No	No	No	No	No	No	No	No	No	No	No	No	No	No	No	No	No	No	No	No	No	No	No	No	No
5.15d					Sensitive Information (Medical)	Mental Health Status	Yes/No	Choose Yes if the item is requested or can be stored by the app.	No	No	No	No	No	No	No	No	No	Registration (Eating Disorder)	Registration (Eating Disorder)	No	No	No	No	No	No	No	No	No	No	No	App (PHQ9 Questions)	No	No	No	No	No	No	No	App	App	No	No	No	No	No	No	No	No	No
5.15e					Sensitive Information (Medical)	Medications	Yes/No	Choose Yes if the item is requested or can be stored by the app.	No	No	No	No	No	No	No	No	No	No	No	No	No	No	No	No	No	No	No	No	No	No	No	Registration (Insulin)	App	App	No	No	No	No	App	App	App	No	No	No	No	No	No	No	No
5.15f					Sensitive Information (Medical)	Substance Use	Yes/No	Choose Yes if the item is requested or can be stored by the app.	No	No	No	No	No	No	No	No	No	No	No	No	No	App (Alcohol)	App (Alcohol)	No	No	No	No	No	No	No	No	No	App (Smoking)	App (Smoking)	App (Smoking)	App (Smoking)	No	App (Alcohol Intake)	App (Alcohol, Drugs)	App (Alcohol, Drugs)	No	No	No	No	No	No	No	No	No
5.15g					Sensitive Information (Medical)	Genetic Information	Yes/No	Choose Yes if the item is requested or can be stored by the app.	No	No	No	No	No	No	No	No	No	No	No	No	No	No	No	No	No	No	No	No	No	No	No	No	No	No	No	No	No	No	No	No	No	No	No	No	No	No	No	No	No
5.15h					Sensitive Information (Medical)	IVF Information	Yes/No	Choose Yes if the item is requested or can be stored by the app.	No	No	No	No	No	No	No	No	No	No	No	No	No	No	No	No	No	No	No	No	No	No	No	No	No	No	No	No	No	No	No	No	No	No	No	No	No	No	No	No	No
5.16a					Identifying Information (Strong)	Photographs of People	Yes/No	Choose Yes if the item is requested or can be stored by the app.	No	No	No	No	No	No	No	No	No	No	No	No	Online Registration	No	No	No	No	No	No	No	No	No	No	No	No	No	No	No	No	No	No	No	No	No	No	No	No	App	No	No	No
5.16b					Other Information	Other Photographs	Yes/No	Choose Yes if the item is requested or can be stored by the app.	No	No	No	No	No	No	No	No	No	App (Barcode Scanner)	App (Barcode Scanner)	No	No	No	No	No	No	No	No	No	No	No	No	No	No	No	App	App	No	No	No	No	App (Reminders)	No	No	No	No	App	No	No	No
5.11c					Identifying Information (Strong)	Social Network Credentials	Yes/No	Choose Yes if the item is requested or can be stored by the app.	No	No	No	No	No	No	No	No	No	No	No	No	No	No	No	No	No	No	No	No	No	No	No	No	No	No	Proxied (Facebook)	Proxied (Facebook)	No	No	No	No	No	No	No	No	No	No	No	No	No
5.17a					Identifying Information (Strong)	Others' Contact Details	Yes/No	Choose Yes if the item is requested or can be stored by the app.	No	No	No	No	No	No	No	No	No	No	No	App (Medical Contact Details)	No	No	No	No	No	No	No	No	No	No	No	No	No	No	No	No	No	No	No	No	No	No	No	No	No	App	No	No	No
5.17b					Identifying Information (Strong)	Others Email Addresses	Yes/No	Choose Yes if the item is requested or can be stored by the app.	No	No	No	No	No	No	No	No	No	No	No	No	No	No	No	No	No	No	No	No	No	No	No	No	No	No	No	No	No	No	No	No	No	No	No	No	No	App (Invitations)	No	No	No
5.18					Other Information	User Generated Content Not Previously Covered	Yes/No	Choose Yes if the item is requested or can be stored by the app.	Bookmarks	No	No	Bookmarks, Feedback/Rating	Bookmarks, Feedback/Rating	Playlist, Reminders	Playlist, Reminders	No	No	Registration (Activity Levels), Forum Messages, Meals	Registration (Activity Levels), Forum Messages, Meals	No	Messages, Job Requests, Online Registration (Care Needs, Hourly Rates)	Annotations	Annotations	Bookmarks	Bookmarks	Bookmarks	Bookmarks	Medical Contact Details, Appointments	Quiz Responses	No	No	App (Food Diary)	No	No	Contact Details, Pregnancy Status, Annotations, Appointments	Contact Details, Pregnancy Status, Annotations, Appointments	No	Annotations, Reminders	Feedback/Rating	Feedback/Rating	Annotations, Reminders	No	No	No	No	App (Messages)	No	No	No
5.12					Identifying Information (Strong)	Financial/Payment Details	Yes/No	Choose Yes if the item is requested or can be stored by the app.	No	No	No	No	No	No	No	No	No	Proxied (Google Play)	Proxied (Google Play)	No	No	No	No	No	No	No	No	No	No	No	No	No	No	No	No	No	No	No	No	No	No	No	No	No	No	No	No	No	No
5.18						Notes	Text		User can bookmark favourite articles and share via Email, Twitter or Facebook (external links).	Information-only app.	Information-only app.	User can submit anonymous 1-5 star rating for each recipe, mark a recipe as a favourite, share by email, add to a shopping list which can be displayed separately. Network connection required to view Most viewed recipes.	User can submit anonymous 1-5 star rating for each recipe, mark a recipe as a favourite, share by email, add to a shopping list which can be displayed separately. Network connection required to view Most viewed recipes.	App allows user to select music to play during brushing and set times at which they would like to receive reminders for tooth brushing, flossing, dentist and hygienist visits and toothbrush replacements.	App allows user to select music to play during brushing and set times at which they would like to receive reminders for tooth brushing, flossing, dentist and hygienist visits and toothbrush replacements.	Information only app. Repeat prescription link redirects to external site (https://systmonline.tpp-uk.com)	Information only app. Repeat prescription link redirects to external site (https://systmonline.tpp-uk.com)	Food diary app.	Food diary app.		Online registration required before being able to access app.	User prompted for gender and age range at startup (mandatory), can be changed later in Settings.	User prompted for gender and age range at startup (mandatory), can be changed later in Settings.	Email address mandatory to start app and cannot later be changed (unclear requirement since data e.g. favourites are not synced). User can indicate which of suggested activities is a favourite.	Email address mandatory to start app and cannot later be changed (unclear requirement since data e.g. favourites are not synced). User can indicate which of suggested activities is a favourite.	Optional email address on registration (cannot change later), user can mark a recipe as favourite, build a shopping list and share recipe by email, facebook or device services. Signup to Change4Life llink redirects to external website.	Optional email address on registration (cannot change later), user can mark a recipe as favourite, build a shopping list and share recipe by email, facebook or device services. Signup to Change4Life llink redirects to external website.	Appointments are synced into device calendar.	Information app with multiple choice quiz.	Information only app.	Questionnaire data to score depression status. App links to patient.co.uk articles on depression (displayed in hosted webbrowser window) .	Registration process configures diabetes type, normal ranges and usual medication App collects diary data on BG, insulin, BP, food intake and hypo episodes. Information about diabetes from patient.co.uk (displayed in hosted webbrowser window).	Parameters collected to perform Qdiabetes calculation.	Parameters collected to perform Qdiabetes calculation.	Diary function can log glucose and insulin use, food intake and weight as well as photograph and free-text notes. To use essential checks recommendations female users must indicate if they are planning on becoming pregant. Can book appointments using native calendar.	Diary function can log glucose and insulin use, food intake and weight as well as photograph and free-text notes. To use essential checks recommendations female users must indicate if they are planning on becoming pregant. Can book appointments using native calendar.	Information-only app.	User can log cravings and alcohol use and set motivational messages to be displayed on a reminder schedule.	Randomly generated User ID used to identify user data. User can indicate self-rated alcohol consumption level. Provides information about alcohol and risk tailored to responses. Asks about antidepressants, mood stabilisers, antipsychotic, cardiac, epilepsy and ulcer medication use; personal or family diagnosis of depression, anxiety or other mental health problem, treatment of alcohol or drugs pr…	Randomly generated User ID used to identify user data. User can indicate self-rated alcohol consumption level. Provides information about alcohol and risk tailored to responses. Asks about antidepressants, mood stabilisers, antipsychotic, cardiac, epilepsy and ulcer medication use; personal or family diagnosis of depression, anxiety or other mental health problem, treatment of alcohol or drugs pr…	Seizure types can be set up and recorded in a diary with waking/sleeping status, length of seizure and notes. Medication can be recorded. Reminders (not specifically medication) can be set with associated photo and comment.		App offers online prescription and apointment booking that opens in hosted browser window (https://systmonline.tpp-uk.com)	App offers online prescription and apointment booking but Button is non-functional in app.	Geolocation used to list local services of type specified by user with map view and optional directions generated by Google.	User can send and receive messages from other users, invite new users by email, create calendar entries and record pictures of people and favourite things.
						Behaviour
5.3c						Is a network connection required to use the app?	Yes/No	Do any main app functions not work if a network connection is not present (ignore third party out-links)? If so, choose Yes.	Yes	No	No	No	No	No	No	No	No	Yes	Yes	No	Yes	No	No	Yes (First Use)	Yes (First Use)	No	No	No	No	No	No	No	No	No	No	No	Yes	No	No	No	No		Yes	Yes	No	Yes
5.2a						Are PID necessary to use the app?	Yes/No	Use judgement to decide if PID must be entered in order for the app to function. An example might be where contact details are requested in order to register to use the app.										Yes	Yes	No	Yes	No	No	Yes	Yes	No	No	No			No	No	No	No	No	No		No	No	No	No				No	Yes
5.2b						Are medical details necessary to use the app?	Yes/No	Use judgement to decide if information about a medical condition must be entered in order for the app to function.										Yes	Yes	Yes	No	No	No	No	No	No	No	No			Yes	Yes	Yes	Yes	Yes	Yes		No	Yes	Yes	No				No	No
5.3a						Does the app offer password or PIN protection?	Yes/No	Pick Yes if a password or passcode mechanism exists to secure the app										Yes	Yes	No	Yes	No	No	No	No	No	No	No			No	Yes	No	No	No	No		No	No	No	No				No	Yes
5.4a						Does the app require a user account?	Yes/No	Pick Yes if a user account is required to access the app.										Yes	Yes	No	Yes	No	No	Yes	Yes	Optional	Optional	No			No	No	No	No	No	No		No	Yes	Yes	No				No	Yes
5.4b						If 5.4a YES, does the account require PID (not including username/password)?	Yes/No	Detail the account requirements										Yes, PID (see Registration tagged fields above) required during registration.	Yes, PID (see Registration tagged fields above) required during registration.		Yes, Online registration required involving PID listed above.			Yes, email address required for registration.	Yes, email address required for registration.	Yes, email address optionally required at startup to join mailing list.	Yes, email address optionally required at startup to join mailing list.												No, pseudonymised key generated to identify user submissions (which can be repeated).	No, pseudonymised key generated to identify user submissions (which can be repeated).						Yes
5.4c						Does the app support multiple profiles?	Yes/No	Choose Yes if the app supports multiple user profiles.										Yes	Yes	No	Yes	No	No	No	No	No	No	No			No	No	No	No	No	No		No	Yes	Yes	No				No	Yes
5.5a						Can the user edit data after creation?	Yes/No	Choose Yes if a user can edit data after creation.	Yes			Some	Some	Yes	Yes			Yes	Yes	Yes	No	Yes	Yes	Some	Some	Yes	Yes	Yes	Yes		Yes	Yes	Yes	Yes	Yes	Yes		Yes	Yes	Yes	Yes				Yes	Some
5.5b						Can the user delete data items after creation?	Yes/No	Choose Yes if a user can delete individual data items after creation.	Yes			Some	Some	Yes	Yes			Yes	Yes	No	No	No	No	No	No	Some	Some	Yes	No		No	Yes	No	No	Yes	Yes		Yes	No	No	Yes				No	Some
5.5c						Can the user wipe all local data within the app?	Yes/No	Choose Yes if a user can wipe all data (not just delete sequential items) without uninstalling the app or using O/S functions.	No			No	No	No	No			Yes	Yes	No	No	No	No	No	No	No	No	No	No		No	Yes	No	No	No	No		No	No	No	No				No	No
5.6a						Does the app offer a backup or data export mechanism (apart from backup services provided by OS)	Yes/No	If there is a way to backup information pick 'Yes (Backup)'. If there is also a way to restore information pick 'Yes (Backup & Restore)'. Otherwise pick 'No'	No			No	No	No	No			No	No	No	No	No	No	No	No	No	No	No	No		No	No	No	No	No	No		No	No	No	No				No	No
5.6b						If 5.6a YES, detail the export mechanism.	Pick from list	Select the appropriate backup type from the list.
5.6c						If 5.6a YES, is the export encrypted?	Yes/No	Pick Yes if the backup is encrypted in some way, otherwise No.
5.6d						If 5.6a YES, provide details	Text	Use free text to briefly describe the backup mechanism (e.g. to SD card)
						Local Storage
5.7a						Are data stored locally?	Yes/No	Choose Yes if there is a local data store.	Yes	No	Yes	Yes	Yes	Yes	Yes	Yes	Yes	Yes	Yes	Yes	Yes	Yes	Yes	Yes	Yes	Yes	Yes	Yes	Yes	Yes	Yes	Yes	No	No	Yes	Yes	Yes	Yes	Yes	Yes	Yes		Yes	No	Yes	No
5.7b						Are local data encrypted?	Yes/No	Choose Yes if the store is encrypted in some way.	No		No	No	No	No	No	No	No	No	No	No	No	No	No	No	No	No	No	No	No	No	No	No	No		No	No	No	No	No	No	No		No		No
5.7c						Personal/Sensitive Data found in local store?	Yes/No	Choose Yes if personal identifiers are found in local store.	No		No	No	No	No	No	No	No	Yes	Yes	No	Yes	No	Yes	Yes	Yes	No	Yes	Yes	No	No	No	Yes	No		Yes	Yes	No	Yes	Yes	Yes	Yes		No		No
5.7d						Username/password insecure?	Yes/No		No	No	No	No	No	No	No	No	No	No (Leaked)	Yes	No	No (Leaked)	No	No	No	No	No	No	No	No	No	No	No	No	No	No	No	No	No	No	No	No	No	No	No	No	No	No	No	No
Data transmission
6.1						Does the app transmit data across the network?	Yes/No	Choose Yes if any data transmission was detected at any point during the monitoring period.	Yes	No	Yes	Yes	Yes	Yes	Yes	Yes	Yes	Yes	Yes	No	Yes	Yes	Yes	Yes	Yes	Yes	Yes	Yes	Yes	Yes	Yes	Yes	Yes	Yes	Yes	Yes	Yes	No	Yes	Yes	No	No	Yes	Yes	Yes	Yes	No	No	No
Online/cloud services or research
7.1						Does the app transmit data to counterpart online or cloud services?	Pick from list	Choose Yes if data are set and stored by an online service operated by the developer OR a data hosting service operated by third party, e.g. PatientsKnowBest	No	No	No	Yes (Developer)	Yes (Developer)	Yes (Developer)	Yes (Developer)	No	No	Yes (Developer)	Yes (Developer)	No	Yes (Developer)	Yes (Developer)	Yes (Developer)	No	No	Yes (Developer)	Yes (Developer)	No	No	No	No	No	No	No	No	No	No	No	Yes (Developer)	Yes (Developer)	No		No	No	Yes (Developer)	Yes (Developer)
						If 7.1 YES…
7.2a						What is the purpose of these services?	Pick from list	Choose the appropriate item from the list that describes the service.				Social Sharing	Social Sharing	Unclear	Unclear			Host User Data, App Functions	Host User Data, App Functions		Host User Data, App Functions	Research	Research			Research	Research												Research	Research					App Functions	Host User Data, App Functions
7.2b	S		17			What services are used?	Comma-separated text	Type the names of the services to which the app sends data.	*	*	*	bhf.org.uk	bhf.org.uk	*	*	*	*	nutracheck.co.uk	nutracheck.co.uk	*	carepair.co.uk	antbits.com	antbits.com	*	*	*	*	*	*	*	*	*	*	*	*	*	*	*	drugsmeter.com	drugsmeter.com	*	*	*	*	smart-droid.com	finerday.com	*	*	*
7.3a						Do the services involve a user account being created or linked?	Pick from list	Choose whether a custom account is created for the app or whether a third party credentials (e.g. Google account) can be used.				No	No	No	No			Developer	Developer		Developer	No	No			No	No												No	No					No	Developer
7.3b						If 7.3a YES, does the account require PID (not including username/password)?	Yes/No	Detail the account requirements										Yes	Yes		Yes																									Yes
7.4a						Can other users access the data created by the user?	Yes/No	Choose Yes or No.				No	No	No	No			Yes	Yes		Yes	No				No	No												No	No					No	Yes
7.4b						Can the user control how other users access the data?	Yes/No	Choose Yes or No.				No	No	No	No			Yes	Yes		Yes	No				No	No												No	No					No	Yes
7.5a						Can user data be accessed on other devices (using the same app)?	Yes/No	Choose Yes or No.				No	No	No	No			Yes	Yes		Yes	No				No	No												No	No					No	Yes
7.6a						Can user data be accessed on other apps?	Yes/No	Choose Yes or No.				No	No	No	No			No	No		No	No				No	No												No	No					No	No
7.6b						If 7.6a YES, list the names of the app(s)	Comma-separated text	Type the names of the apps, separated by commas.
7.7a						Can user data be accessed on the web?	Yes/No	Choose Yes or No.				No	No	No	No			Yes	Yes		Yes	No				No	No												No	No					No	Yes
7.7b						If 7.7a YES, what is the URL of the services?	Link	Type the URL of the web-facing service.										http://www.nutracheck.co.uk/	http://www.nutracheck.co.uk/		http://www.carepair.co.uk																									www.finerday.com
7.8a						Are the online services mandatory?	Yes/No	Choose Yes or No.				No	No	No	No			Yes	Yes		Yes	Yes				Yes	Yes												No	No					Yes	No
7.8b	59	1		2		If 7.8a NO, does the policy mention opting out of these services?	Pick from list	Pick appropriate item from the list.	No	Yes (Web='Details of how to unsubscribe from this service are present in every email. purely voluntary ')	Yes (Web='Details of how to unsubscribe from this service are present in every email. purely voluntary ')	No	No	No	No	*	*	No	No	Yes (Web=' if volunteered to us by you.')	No	Yes (Web='It is completely up to you whether or not you want to provide it.')	Yes (Web='It is completely up to you whether or not you want to provide it.')	Yes (App), Yes (Web) (App='If you don’t wish to receive any further emails from Change4Life, you can unsubscribe via a link in this email.', Web='It is completely up to you whether or not you want to provide it.')	Yes (App), Yes (Web) (App='If you don’t wish to receive any further emails from Change4Life, you can unsubscribe via a link in this email.', Web='It is completely up to you whether or not you want to provide it.')	Yes (Web='It is completely up to you whether or not you want to provide it.')	Yes (Web=' please keep in mind you can disable cookies on your computer by changing the settings in preferences or options menu in your browser It is completely up to you whether or not you want to provide it.')	*	*	*	Yes (Web='You will only receive emails that you have agreed to If you do not want to grant EMIS the rights set out above, please do not submit your contribution to the Website forum')	Yes (Web='You will only receive emails that you have agreed to If you do not want to grant EMIS the rights set out above, please do not submit your contribution to the Website forum')	*	*	No	No	*	*	*	*	*	*	*	*	No	Yes (Web=' we generally allow you to specify in your profile settings that you do not want this to be done or to take other actions that limit the connection of this information to your profile')	No	No	*
7.8d						Can the user use the services without providing identifiable information?	Yes/No	Choose Yes or No.				Yes	Yes	Yes	Yes			No	No		No	Yes				Yes	Yes												Yes	Yes					No	No
7.8e						Does the app indicate when data are being sent to online services?	Yes/No	Choose Yes or No.				Yes	Yes	No	No			Yes	Yes		No	No				No	No												Yes	Yes					No	No
7.8f						Can the user control when data are synced with or sent to online services?	Yes/No	Choose Yes or No.				No	No	No	No			No	No		No	No				No	No												Yes	Yes					No	No
7.9a	58	1		2		Does the privacy policy mention transmission of data to online services?	Yes/No	Choose Yes or No.	Yes (Web='We will not sell your details to any third parties but we may sometimes also share your information with our trusted service providers who are authorised to act on our behalf. Other than as set out in this policy or as required by law, your personal information is not shared with third parties or used in any other way unless you agree.')	Yes (Web='The e-mail address will be used to send confirmation of your username and password, and will be used to send you emails containing details of our new additions and updates. Details of how to unsubscribe from this service are present in every email. NOTE: This is an insecure way of sending information so be careful to use non-sensitive details that cannot be misused. Our update emails ar…	Yes (Web='The e-mail address will be used to send confirmation of your username and password, and will be used to send you emails containing details of our new additions and updates. Details of how to unsubscribe from this service are present in every email. NOTE: This is an insecure way of sending information so be careful to use non-sensitive details that cannot be misused. Our update emails ar…	Yes (Web='The BHF may share your information with other entities owned by BHF that act as fundraisers for BHF, sell BHF products or provide BHF information subject to your communication preferences. We use analytic cookies from two providers – Google Analytics and Adobe Sitecatalyst. You can control our use of either or both of these by clicking on the following links.')	Yes (Web='The BHF may share your information with other entities owned by BHF that act as fundraisers for BHF, sell BHF products or provide BHF information subject to your communication preferences. We use analytic cookies from two providers – Google Analytics and Adobe Sitecatalyst. You can control our use of either or both of these by clicking on the following links.')	Yes (Web='We may also ask you for information when you enter a competition or promotion sponsored by Brush DJ and when you report a problem with our site. We may also ask you to complete surveys that we use for research purposes, although you do not have to respond to them. We may collect information about your computer, including where available your IP address, operating system and browser type…	Yes (Web='We may also ask you for information when you enter a competition or promotion sponsored by Brush DJ and when you report a problem with our site. We may also ask you to complete surveys that we use for research purposes, although you do not have to respond to them. We may collect information about your computer, including where available your IP address, operating system and browser type…	*	*	Yes (App), Yes (Web) (App='If you use the Mobile App, we collect data when you: register as a member; add food, drink or exercise items to your diary manually add or amend product data add your weight and waist history post or reply to messages in the forums Scan a barcode change settings', Web='If you register as a member, we collect data when you: register as a member; update your profile or on…	Yes (App), Yes (Web) (App='If you use the Mobile App, we collect data when you: register as a member; add food, drink or exercise items to your diary manually add or amend product data add your weight and waist history post or reply to messages in the forums Scan a barcode change settings', Web='If you register as a member, we collect data when you: register as a member; update your profile or on…	Yes (Web='This system will record your email address and other information if volunteered to us by yo')	Yes (App='We may collect, store and use the following kinds of personal information: Information that we collect may be stored and processed in and transferred between any of the countries in which we operate in order to enable us to use the information in accordance with this privacy policy.')	Yes (Web='We also collect information when you give it to us on registering for Change4Life')	Yes (Web='We also collect information when you give it to us on registering for Change4Life')	Yes (App), Yes (Web) (App='Your email address will be passed to other data processors acting under the control of the Department of Health, in order to help the Department of Health provide services, to provide customer support and for other purposes described in full in the Change4Life privacy policy.', Web='We also collect information when you give it to us on registering for Change4Life')	Yes (App), Yes (Web) (App='Your email address will be passed to other data processors acting under the control of the Department of Health, in order to help the Department of Health provide services, to provide customer support and for other purposes described in full in the Change4Life privacy policy.', Web='We also collect information when you give it to us on registering for Change4Life')	Yes (App), Yes (Web) (App=' it only with authorised Data Processors, who must act at all times on instructions from the Data Controller under the Data Protection Act 1998.', Web='We also collect information when you give it to us on registering for Change4Life')	Yes (App), Yes (Web) (App=' it only with authorised Data Processors, who must act at all times on instructions from the Data Controller under the Data Protection Act 1998.', Web=' which is then kept in our Internet access logs. We also collect information when you give it to us on registering for Change4Life.')	*	*	*	Yes (Web='As a user you agree to any registration information you enter being stored in a database. If you submit any contribution to this Website via the forum')	Yes (Web='As a user you agree to any registration information you enter being stored in a database. If you submit any contribution to this Website via the forum')	*	*	Yes (Web=' All information you provide to us is stored on our secure servers.')	Yes (Web=' All information you provide to us is stored on our secure servers.')	*	*	*	*	*	*	*	*	Yes (Web='We collect personal information when you sign up for and use our services')	Yes (Web=' When you register to become a member of Finerday, you submit certain personal information, such as your name and email address and any other personal or preference information that you choose to submit.')	Yes (Web='collection, collation, recording and storage of Information')	Yes (Web='collection, collation, recording and storage of Information')	*
7.9b						Does the app UI mention transmission of data to online services?	Yes/No	Choose Yes or No.				Yes (After the fact)	Yes (After the fact)	No	No			No	No		No	Yes (Before the fact)	Yes (Before the fact)			Yes (Before the fact)	Yes (Before the fact)												Yes (Before the fact)	Yes (Before the fact)					No	No
7.9c	58	16384		2		Does the app description mention transmission of data to online services?	Yes/No	Choose Yes or No.	No	No	No	No	No	No	No	No	No	No	Yes ('Use the App standalone, or with the Nutracheck.co.uk website - online members simply sign in with their email and password')	No	No	No	Yes (' Share with friends via Facebook or Twitter')	Yes ('Share with friends via Facebook, Twitter or email.')	No	Yes ('Share with friends via Facebook and Twitter')	No	No	No	No	No	No	Yes ('Note: The data collected by this app is used only for the purposes of performing the calculation, and is not saved or shared with anyone..')	Yes (' The data collected by this app is used only for the purposes of performing the calculation, and is not saved or shared with anyone.')	Yes ('★ Share your graphs and notes on Facebook and Twitter ★ Take photos of your meals, or anything that reminds you of your day ')	No	*	*	Yes	No	No	*	No	No	No	Yes ('The App offers secure messaging, shares photos and special dates, stores favourite web links and contains a portal which will shortly offer personalised healthcare information and technologies.')	*	No	*
7.10a	60	1		2		Does the privacy policy mention editing data held by the online services?	Yes/No	Choose Yes or No.	Yes (Web='You can ask us what information we hold about you by contacting us Please keep your information up to date by letting us know of any changes.')	Yes (Web='Users can securely log in to their personal account page to view what data is held on them, and then have the facility to edit or delete their own record.')	Yes (Web='Users can securely log in to their personal account page to view what data is held on them, and then have the facility to edit or delete their own record.')	Yes (Web='You can edit your BHF account Information, including your address and contact details at any time. You cannot directly change the name, address, contact details and other details of existing orders, but can contact the BHF to change order details if you need to.')	Yes (Web='You can edit your BHF account Information, including your address and contact details at any time. You cannot directly change the name, address, contact details and other details of existing orders, but can contact the BHF to change order details if you need to.')	No	No	*	*	Yes (App), Yes (Web) (App='Access to &amp; Updating Your Data Where You are a Member, You may access Your Data contained in Your Member Account via the "My Profile" section of the App.', Web=' You may access and update Your Data contained in Your Member Account accessed by the "My Profile" tab. You must make sure that You update Your Data as soon as possible with any and all relevant changes.')	Yes (App), Yes (Web) (App='Access to &amp; Updating Your Data Where You are a Member, You may access Your Data contained in Your Member Account via the "My Profile" section of the App.', Web=' You may access and update Your Data contained in Your Member Account accessed by the "My Profile" tab. You must make sure that You update Your Data as soon as possible with any and all relevant changes.')	No	Yes (App='Please let us know if the personal information which we hold about you needs to be corrected or updated.')	Yes (Web='You are entitled to know whether we hold information about you and, if we do, to have access to that information and require it to be corrected if it is inaccurate.')	Yes (Web='You are entitled to know whether we hold information about you and, if we do, to have access to that information and require it to be corrected if it is inaccurate.')	Yes (Web='You are entitled to know whether we hold information about you and, if we do, to have access to that information and require it to be corrected if it is inaccurate.')	Yes (Web='You are entitled to know whether we hold information about you and, if we do, to have access to that information and require it to be corrected if it is inaccurate.')	Yes (Web='You are entitled to know whether we hold information about you and, if we do, to have access to that information and require it to be corrected if it is inaccurate.')	No	*	*	*	Yes (Web=' You can retrieve, change or delete the details you place with us')	Yes (Web=' You can retrieve, change or delete the details you place with us')	*	*	No	No	*	*	*	*	*	*	*	*	Yes (Web='n You may access and modify your contact information by contacting Customer Service. We will make good faith efforts to resolve requests to correct inaccurate information except where the request is unreasonable, requires disproportionate technical effort or expense, jeopardizes the privacy of others, or would be impractical')	Yes (Web='n You can review and revise your personal information, and who will be given access to your personal information, at any ti')	Yes (Web='request where necessary, the correction, destruction or deletion of his/her personal Information, by contacting FolUp in terms of 14.2')	Yes (Web='request where necessary, the correction, destruction or deletion of his/her personal Information, by contacting FolUp in terms of 14.2')	*
7.10b						Can the user edit data held by the online services?	Pick from list	Choose the method by which a user can edit data or 'No' if the user cannot edit data.				No	No	No	No			Through App	Through App			By Contacting Developer	By Contacting Developer			By Contacting Developer	By Contacting Developer												Through App	Through App					No	Through App
7.11a	61	1		2		Does the privacy policy address deleting data held by the online services?	Yes/No	Choose Yes or No.	No	Yes (Web='Users can securely log in to their personal account page to view what data is held on them, and then have the facility to edit or delete their own record.')	Yes (Web='Users can securely log in to their personal account page to view what data is held on them, and then have the facility to edit or delete their own record.')	No	No	No	No	*	*	No	No	No	No	No	No	No	No	No	No	*	*	*	Yes (Web=' You can retrieve, change or delete the details you place with us')	Yes (Web=' You can retrieve, change or delete the details you place with us')	*	*	No	No	*	*	*	*	*	*	*	*	No	No	Yes (Web='. withdrawing his/her consent to the Processing of any Information supplied by the User for purposes of the Servic 14.2. If at any time, a User wishes to discontinue making use of the Website, please contact us or email us at www.folup.com following which the User’s User IDs and User account will be disabled.')	Yes (Web='. withdrawing his/her consent to the Processing of any Information supplied by the User for purposes of the Servic 14.2. If at any time, a User wishes to discontinue making use of the Website, please contact us or email us at www.folup.com following which the User’s User IDs and User account will be disabled.')	*
7.11b						Can the user delete data held by the online services?	Pick from list	Choose the method by which a user can delete data or 'No' if the user cannot delete data.				No	No	No	No			Through App	Through App			No	No			No	No												No	No					No	Through App
7.12a	D		17			What destination domains are used for receiving online service data?	Comma-separated text	Type the domain(s) where the data are sent, separated by commas.	*	*	*	www.bhf.org.uk	www.bhf.org.uk	*	*	*	*	iphone2.nutracheck.co.uk	iphone2.nutracheck.co.uk, www.nutracheck.co.uk	*	www.carepair.co.uk	downloads.antbits.com	downloads.antbits.com	*	*	downloads.antbits.com	193.110.88.157, downloads.antbits.com	*	*	*	*	*	*	*	*	*	*	*	www.drugsmeter.com	www.drugsmeter.com	*	*	*	*	smart-droid.com	finerday.com	*	*	*
7.12b	C		17			What are the countries of the destination domains	Comma-separated text	Type the countries where the data are sent, separated by commas.	*	*	*	GB	GB	*	*	*	*	GB	GB	*	GB	GB	GB	*	*	GB	GB	*	*	*	*	*	*	*	*	*	*	*	US	US	*	*	*	*	NL	GB	*	*	*
7.12c	V		17			All destination domains associated with cloud services (not just those to which recognised data are transmitted).	Comma-separated text	Type the domain(s) where the data are sent, separated by commas.	*	*	*	www.bhf.org.uk	www.bhf.org.uk	brushdj.appware.co.uk	brushdj.appware.co.uk	*	*	iphone2.nutracheck.co.uk	graphs.nutracheck.mobi, iphone2.nutracheck.co.uk, www.nutracheck.co.uk, forum.nutracheck.co.uk	*	www.carepair.co.uk	downloads.antbits.com	downloads.antbits.com	*	*	downloads.antbits.com	193.110.88.157, downloads.antbits.com	*	*	*	*	*	*	*	*	*	*	*	www.drugsmeter.com	www.drugsmeter.com	*	*	*	*	smart-droid.com	finerday.com	*	*	*
7.14a						API vulnerable	Yes/No		*	*	*	*	*	*	*	*	*	No	No	*	No	*	*	*	*	*	*	*	*	*	*	*	*	*	*	*	*	*	*	*	*	*	*	*	*	Yes (No Access Control)	*	*	*
						If 7.1 YES, does the app transmit any of the following to online services…
7.13a	17		17			Name (First or Unspecified)	Yes/No	Choose Yes or No.	*	*	*	*	*	*	*	*	*	Yes (HTTP)	Yes (HTTP)	*	*	*	*	*	*	*	*	*	*	*	*	*	*	*	*	*	*	*	*	*	*	*	*	*	*	*	*	*	*
7.13b	18		17			Full Name	Yes/No	Choose Yes or No.	*	*	*	*	*	*	*	*	*	*	*	*	Yes (HTTPS)	*	*	*	*	*	*	*	*	*	*	*	*	*	*	*	*	*	*	*	*	*	*	*	*	Yes (HTTP)	*	*	*
7.13c	19		17			Age or Year of Birth	Yes/No	Choose Yes or No.	*	*	*	*	*	*	*	*	*	Yes (HTTP)	Yes (HTTP)	*	*	Yes (HTTPS)	Yes (HTTPS)	*	*	*	*	*	*	*	*	*	*	*	*	*	*	*	Yes (HTTP)	Yes (HTTP)	*	*	*	*	*	*	*	*	*
7.13d	20		17			Date of Birth	Yes/No	Choose Yes or No.	*	*	*	*	*	*	*	*	*	*	*	*	*	*	*	*	*	*	*	*	*	*	*	*	*	*	*	*	*	*	*	*	*	*	*	*	*	Yes (HTTP)	*	*	*
7.13e	21		17			Gender	Yes/No	Choose Yes or No.	*	*	*	*	*	*	*	*	*	Yes (HTTP)	Yes (HTTP)	*	*	Yes (HTTPS)	Yes (HTTPS)	*	*	*	*	*	*	*	*	*	*	*	*	*	*	*	Yes (HTTP)	Yes (HTTP)	*	*	*	*	*	Yes (HTTP)	*	*	*
7.13f	22		17			Ethnicity	Yes/No	Choose Yes or No.	*	*	*	*	*	*	*	*	*	*	*	*	*	*	*	*	*	*	*	*	*	*	*	*	*	*	*	*	*	*	*	*	*	*	*	*	*	*	*	*	*
7.13g	23		17			Sexuality	Yes/No	Choose Yes or No.	*	*	*	*	*	*	*	*	*	*	*	*	*	*	*	*	*	*	*	*	*	*	*	*	*	*	*	*	*	*	Yes (HTTP)	Yes (HTTP)	*	*	*	*	*	*	*	*	*
7.13h	24		17			Political Affiliation	Yes/No	Choose Yes or No.	*	*	*	*	*	*	*	*	*	*	*	*	*	*	*	*	*	*	*	*	*	*	*	*	*	*	*	*	*	*	*	*	*	*	*	*	*	*	*	*	*
7.13i	25		17			Religious Beliefs	Yes/No	Choose Yes or No.	*	*	*	*	*	*	*	*	*	*	*	*	*	*	*	*	*	*	*	*	*	*	*	*	*	*	*	*	*	*	*	*	*	*	*	*	*	*	*	*	*
7.13j	26		17			Employment Status	Yes/No	Choose Yes or No.	*	*	*	*	*	*	*	*	*	*	*	*	Yes (HTTPS)	*	*	*	*	*	*	*	*	*	*	*	*	*	*	*	*	*	Yes (HTTP)	Yes (HTTP)	*	*	*	*	*	*	*	*	*
7.13k	27		17			Disability Status	Yes/No	Choose Yes or No.	*	*	*	*	*	*	*	*	*	*	*	*	*	*	*	*	*	*	*	*	*	*	*	*	*	*	*	*	*	*	*	*	*	*	*	*	*	*	*	*	*
7.13l	28		17			Postal Address	Yes/No	Choose Yes or No.	*	*	*	*	*	*	*	*	*	*	*	*	*	*	*	*	*	*	*	*	*	*	*	*	*	*	*	*	*	*	*	*	*	*	*	*	*	*	*	*	*
7.13ar						Full Postcode	Yes/No	Choose Yes or No.	*	*	*	*	*	*	*	*	*	*	*	*	Yes (HTTPS)	*	*	*	*	*	*	*	*	*	*	*	*	*	*	*	*	*	*	*	*	*	*	*	*	Yes (HTTP)	*	*	*
7.13m	29		17			Country or Area or Partial Postcode	Yes/No	Choose Yes or No.	*	*	*	*	*	*	*	*	*	*	*	*	*	*	*	*	*	*	*	*	*	*	*	*	*	*	*	*	*	*	Yes (HTTP)	Yes (HTTP)	*	*	*	*	*	Yes (HTTP)	*	*	*
7.13n	30		17			Geolocation	Yes/No	Choose Yes or No.	*	*	*	*	*	*	*	*	*	*	*	*	Yes (HTTPS)	*	*	*	*	*	*	*	*	*	*	*	*	*	*	*	*	*	*	*	*	*	*	*	Yes (HTTP)	*	*	*	*
7.13o	31		17			Email Address	Yes/No	Choose Yes or No.	*	*	*	*	*	*	*	*	*	Yes (HTTP)	Yes (HTTP)	*	Yes (HTTPS)	*	*	*	*	*	*	*	*	*	*	*	*	*	*	*	*	*	*	*	*	*	*	*	*	Yes (HTTP)	*	*	*
7.13p	32		17			Telephone Numbers	Yes/No	Choose Yes or No.	*	*	*	*	*	*	*	*	*	*	*	*	*	*	*	*	*	*	*	*	*	*	*	*	*	*	*	*	*	*	*	*	*	*	*	*	*	*	*	*	*
7.13q	33		17			Username	Yes/No	Choose Yes or No.	*	*	*	*	*	*	*	*	*	Yes (HTTP)	*	*	Yes (HTTPS)	*	*	*	*	*	*	*	*	*	*	*	*	*	*	*	*	*	*	*	*	*	*	*	*	Yes (HTTP)	*	*	*
7.13s	34		17			Password	Yes/No	Choose Yes or No.	*	*	*	*	*	*	*	*	*	Yes (HTTP)	Yes (HTTP)	*	Yes (HTTPS)	*	*	*	*	*	*	*	*	*	*	*	*	*	*	*	*	*	*	*	*	*	*	*	*	Yes (HTTP)	*	*	*
7.13t	35		17			Medical System Numbers	Yes/No	Choose Yes or No.	*	*	*	*	*	*	*	*	*	*	*	*	*	*	*	*	*	*	*	*	*	*	*	*	*	*	*	*	*	*	*	*	*	*	*	*	*	*	*	*	*
7.13u	36		17			Social Security Number	Yes/No	Choose Yes or No.	*	*	*	*	*	*	*	*	*	*	*	*	*	*	*	*	*	*	*	*	*	*	*	*	*	*	*	*	*	*	*	*	*	*	*	*	*	*	*	*	*
7.13v	37		17			Hobbies and Interests	Yes/No	Choose Yes or No.	*	*	*	*	*	*	*	*	*	*	*	*	Yes (HTTPS)	*	*	*	*	*	*	*	*	*	*	*	*	*	*	*	*	*	*	*	*	*	*	*	*	*	*	*	*
7.13x	38		17			Measured Health Parameters	Yes/No	Choose Yes or No.	*	*	*	*	*	*	*	*	*	Yes (HTTP)	Yes (HTTP)	*	*	*	*	*	*	*	*	*	*	*	*	*	*	*	*	*	*	*	*	*	*	*	*	*	*	*	*	*	*
7.13y	39		17			Medical History	Yes/No	Choose Yes or No.	*	*	*	*	*	*	*	*	*	*	*	*	*	*	*	*	*	*	*	*	*	*	*	*	*	*	*	*	*	*	*	Yes (HTTP)	*	*	*	*	*	*	*	*	*
7.13z	40		17			HIV Status	Yes/No	Choose Yes or No.	*	*	*	*	*	*	*	*	*	*	*	*	*	*	*	*	*	*	*	*	*	*	*	*	*	*	*	*	*	*	*	*	*	*	*	*	*	*	*	*	*
7.13aa	41		17			Mental Health Status	Yes/No	Choose Yes or No.	*	*	*	*	*	*	*	*	*	*	*	*	*	*	*	*	*	*	*	*	*	*	*	*	*	*	*	*	*	*	Yes (HTTP)	Yes (HTTP)	*	*	*	*	*	*	*	*	*
7.13ab	42		17			Medications	Yes/No	Choose Yes or No.	*	*	*	*	*	*	*	*	*	*	*	*	*	*	*	*	*	*	*	*	*	*	*	*	*	*	*	*	*	*	Yes (HTTP)	Yes (HTTP)	*	*	*	*	*	*	*	*	*
7.13ac	43		17			Substance Use	Yes/No	Choose Yes or No.	*	*	*	*	*	*	*	*	*	*	*	*	*	*	*	*	*	*	*	*	*	*	*	*	*	*	*	*	*	*	*	Yes (HTTP)	*	*	*	*	*	*	*	*	*
7.13ad	44		17			Genetic Information	Yes/No	Choose Yes or No.	*	*	*	*	*	*	*	*	*	*	*	*	*	*	*	*	*	*	*	*	*	*	*	*	*	*	*	*	*	*	*	*	*	*	*	*	*	*	*	*	*
7.13ae	45		17			IVF Information	Yes/No	Choose Yes or No.	*	*	*	*	*	*	*	*	*	*	*	*	*	*	*	*	*	*	*	*	*	*	*	*	*	*	*	*	*	*	*	*	*	*	*	*	*	*	*	*	*
7.13af	46		17			Photographs of People	Yes/No	Choose Yes or No.	*	*	*	*	*	*	*	*	*	*	*	*	*	*	*	*	*	*	*	*	*	*	*	*	*	*	*	*	*	*	*	*	*	*	*	*	*	*	*	*	*
7.13ag	47		17			Other Photographs	Yes/No	Choose Yes or No.	*	*	*	*	*	*	*	*	*	*	*	*	*	*	*	*	*	*	*	*	*	*	*	*	*	*	*	*	*	*	*	*	*	*	*	*	*	*	*	*	*
7.13ah	48		17			Social Network Credentials	Yes/No	Choose Yes or No.	*	*	*	*	*	*	*	*	*	*	*	*	*	*	*	*	*	*	*	*	*	*	*	*	*	*	*	*	*	*	*	*	*	*	*	*	*	*	*	*	*
7.13ai	49		17			Others' Contact Details	Yes/No	Choose Yes or No.	*	*	*	*	*	*	*	*	*	*	*	*	*	*	*	*	*	*	*	*	*	*	*	*	*	*	*	*	*	*	*	*	*	*	*	*	*	*	*	*	*
7.13aj	50		17			Others Email Addresses	Yes/No	Choose Yes or No.	*	*	*	*	*	*	*	*	*	*	*	*	*	*	*	*	*	*	*	*	*	*	*	*	*	*	*	*	*	*	*	*	*	*	*	*	*	*	*	*	*
7.13ak	51		17			User Generated Content Not Previously Covered	Yes/No	Choose Yes or No.	*	*	*	Yes (HTTP)	Yes (HTTP)	*	*	*	*	Yes (HTTP)	Yes (HTTP)	*	*	*	*	*	*	*	*	*	*	*	*	*	*	*	*	*	*	*	Yes (HTTP)	Yes (HTTP)	*	*	*	*	*	*	*	*	*
7.13al	52		17			Usage Data	Yes/No	Choose Yes or No.	*	*	*	*	*	*	*	*	*	Yes (HTTP)	*	*	Yes (HTTPS)	Yes (HTTPS)	Yes (HTTPS)	*	*	Yes (HTTPS)	Yes (HTTPS)	*	*	*	*	*	*	*	*	*	*	*	*	*	*	*	*	*	*	*	*	*	*
7.13am	89		17			Device Unique Identifier	Yes/No	Choose Yes or No.	*	*	*	*	*	*	*	*	*	*	*	*	*	*	*	*	*	*	*	*	*	*	*	*	*	*	*	*	*	*	*	*	*	*	*	*	*	*	*	*	*
7.13an	91		17			Other Unique Identifier	Yes/No	Choose Yes or No.	*	*	*	*	*	*	*	*	*	Yes (HTTP)	Yes (HTTP)	*	*	Yes (HTTPS)	Yes (HTTPS)	*	*	Yes (HTTPS)	Yes (HTTPS)	*	*	*	*	*	*	*	*	*	*	*	*	Yes (HTTP)	*	*	*	*	*	Yes (HTTP)	*	*	*
7.13ao	92		17			Device Characteristics	Yes/No	Choose Yes or No.	*	*	*	Yes (HTTP)	Yes (HTTP)	Yes (HTTP)	Yes (HTTP)	*	*	Yes (HTTP)	Yes (HTTP)	*	Yes (HTTPS)	Yes (HTTPS)	Yes (HTTPS)	*	*	Yes (HTTPS)	Yes (HTTPS)	*	*	*	*	*	*	*	*	*	*	*	Yes (HTTP)	Yes (HTTP)	*	*	*	*	Yes (HTTP)	Yes (HTTP)	*	*	*
7.13ap	93		17			IP Address	Yes/No	Choose Yes or No.	*	*	*	Yes (HTTP)	Yes (HTTP)	Yes (HTTP)	Yes (HTTP)	*	*	Yes (HTTP)	Yes (HTTP)	*	Yes (HTTPS)	Yes (HTTPS)	Yes (HTTPS)	*	*	Yes (HTTPS)	Yes (HTTPS)	*	*	*	*	*	*	*	*	*	*	*	Yes (HTTP)	Yes (HTTP)	*	*	*	*	Yes (HTTP)	Yes (HTTP)	*	*	*
7.13aq	94		17			Financial/Payment Details	Yes/No	Choose Yes or No.	*	*	*	*	*	*	*	*	*	*	*	*	*	*	*	*	*	*	*	*	*	*	*	*	*	*	*	*	*	*	*	*	*	*	*	*	*	*	*	*	*
Advertisers
8.1a						Does the app display adverts?	Yes/No	Choose Yes if the app has adverts.	No	No	No	No	No	No	No	No	No	No	No	No	No	No	No	Yes (Marketing)	No	No	No	No	No	No	Yes (Adverts)	Yes (Adverts)	No	No	No	No	No	No	No	No	No		No	No	Yes (Adverts)	No
8.1b						Does the app transmit data to an advertiser or marketing company?	Yes/No	Choose Yes if the app transmits data to any advetsiing/marketing company.	No	No	No	No	No	No	No	No	No	No	No	No	No	No	No	Yes	No	Yes	Yes	No	No	No	Yes	Yes	No	No	No	No	No	No	No	No	No	No	No	No	Yes	No	No	No	No
						If 8.1a YES…
8.1b	S		4			What advertising/marketing services are used?	Comma-separated text	Type the names of the marketing or advertising services to which the app sends data.	*	*	*	*	*	*	*	*	*	*	*	*	*	*	*	Lateral Group	*	Google AdSense / AdWords, Lateral Group	Lateral Group, lateralgroup.co.uk	*	*	*	Google DoubleClick, MobClix, PubMatic	Google DoubleClick, PubMatic	*	*	*	*	*	*	*	*	*	*	*	*	Google DoubleClick	*	*	*	*
8.2a						What kind of adverts does the app use?	Pick from list	Pick the appropriate type of advertisements from the list, or 'No' if data are sent but no adverts displayed.	*	*	*	*	*	*	*	*	*	*	*	*	*	*	*	*	*	*	*	*	*	*	*	*	*	*	*	*	*	*	*	*	*	*	*	*	Banner	*	*	*	*
8.3a						Can users opt-out of advertisements/marketing data?	Pick from list	Choose the mechanism by which users can opt-out of advertising.	*	*	*	*	*	*	*	*	*	*	*	*	*	*	*	*	*	*	*	*	*	*	*	*	*	*	*	*	*	*	*	*	*	*	*	*	No	*	*	*	*
8.3b						If 8.3a YES, do users need to pay to opt-out?	Yes/No	Choose Yes or No.	*	*	*	*	*	*	*	*	*	*	*	*	*	*	*	*	*	*	*	*	*	*	*	*	*	*	*	*	*	*	*	*	*	*	*	*	*	*	*	*	*
8.4b						Does the app mention transmission of data to advertisers?	Yes/No	Choose Yes or No.	*	*	*	*	*	*	*	*	*	*	*	*	*	*	*	*	*	*	*	*	*	*	*	*	*	*	*	*	*	*	*	*	*	*	*	*	No	*	*	*	*
8.4c						Does the app mention transmission of data to advertisers prominently on first use?	Yes/No	Choose Yes or No.	*	*	*	*	*	*	*	*	*	*	*	*	*	*	*	*	*	*	*	*	*	*	*	*	*	*	*	*	*	*	*	*	*	*	*	*	No	*	*	*	*
8.4d	62	16384		2		Does the app description mention transmission of data to advertisers?	Yes/No	Choose Yes or No.	No	No	No	No	No	No	No	No	No	No	No	No	No	No	No	No	No	No	No	No	No	No	No	No	No	Yes (' The data collected by this app is used only for the purposes of performing the calculation, and is not saved or shared with anyone.')	No	No	*	*	No	No	No	*	No	No	Yes ('Please note this free app is supported by ads. An ad free version is also available at small price. Search for "Ad free - Find NHS Services".')	No	*	No	*
8.5a						Is there a separate policy for advertising?	Yes/No	Choose Yes or No.	*	*	*	*	*	*	*	*	*	*	*	*	*	*	*	No	No	*	*	*	*	*	*	*	*	*	*	*	*	*	*	*	*	*	*	*	No	*	*	*	*
8.5b						If 8.5a YES, what is the URL of the policy?	Text	Type the URL of the policy.	*	*	*	*	*	*	*	*	*	*	*	*	*	*	*	*	*	*	*	*	*	*	*	*	*	*	*	*	*	*	*	*	*	*	*	*	*	*	*	*	*
8.5c						If 8.5a YES, what is the filename of the extracted policy?	Text	Type the filename of the extracted policy.	*	*	*	*	*	*	*	*	*	*	*	*	*	*	*	*	*	*	*	*	*	*	*	*	*	*	*	*	*	*	*	*	*	*	*	*	*	*	*	*	*
8.5d	9	128		2		Does the policy mention finding information about what data are held by the advertisers?	Yes/No	Choose Yes or No.	*	*	*	*	*	*	*	*	*	*	*	*	*	*	*	*	*	*	*	*	*	*	*	*	*	*	*	*	*	*	*	*	*	*	*	*	*	*	*	*	*
8.5f	62	129		2		Does any privacy policy mention transmission of data to advertisers?	Yes/No	Choose Yes or No.	No	Yes (' will never be used for any other purpose other than that for which it was submitted or sold on to third partie')	Yes (' will never be used for any other purpose other than that for which it was submitted or sold on to third partie')	No	No	Yes ('s We may collect information about your computer, including where available your IP address, operating system and browser type, for system administration and to report aggregate information to our advertisers This is statistical data about our users' browsing actions and patterns, and does not identify any individual.')	Yes ('s We may collect information about your computer, including where available your IP address, operating system and browser type, for system administration and to report aggregate information to our advertisers This is statistical data about our users' browsing actions and patterns, and does not identify any individual.')	*	*	Yes ('Some general statistical information about the website user base, sales patterns, traffic volumes, food consumption statistics and related matters may be passed on to reputable third parties but these details will not include information personally identifying you. Any marketing under paragraph 3(a) point (vi) is conducted by Us on behalf of third parties and they do not have any access to …	Yes ('Some general statistical information about the website user base, sales patterns, traffic volumes, food consumption statistics and related matters may be passed on to reputable third parties but these details will not include information personally identifying you. Any marketing under paragraph 3(a) point (vi) is conducted by Us on behalf of third parties and they do not have any access to …	No	Yes (' send to you our newsletter and other marketing communications relating to our business or the businesses of carefully-selected third parties which we think may be of interest to you by post or, where you have specifically agreed to this, by email or similar technology (you can inform us at any time if you no longer require marketing communications) We will not without your express consent …	Yes ('When visiting pages that display a Facebook Like button, information relating to the date and time of your visit, the web page you are on (commonly known as the URL) and other technical information about the IP address, browser and operating system you use will be collected by Facebook. If you are logged into Facebook, your user ID number will also be associated with the information mention…	Yes ('When visiting pages that display a Facebook Like button, information relating to the date and time of your visit, the web page you are on (commonly known as the URL) and other technical information about the IP address, browser and operating system you use will be collected by Facebook. If you are logged into Facebook, your user ID number will also be associated with the information mention…	Yes ('When visiting pages that display a Facebook Like button, information relating to the date and time of your visit, the web page you are on (commonly known as the URL) and other technical information about the IP address, browser and operating system you use will be collected by Facebook. If you are logged into Facebook, your user ID number will also be associated with the information mention…	Yes ('When visiting pages that display a Facebook Like button, information relating to the date and time of your visit, the web page you are on (commonly known as the URL) and other technical information about the IP address, browser and operating system you use will be collected by Facebook. If you are logged into Facebook, your user ID number will also be associated with the information mention…	Yes ('When visiting pages that display a Facebook Like button, information relating to the date and time of your visit, the web page you are on (commonly known as the URL) and other technical information about the IP address, browser and operating system you use will be collected by Facebook. If you are logged into Facebook, your user ID number will also be associated with the information mention…	Yes ('When visiting pages that display a Facebook Like button, information relating to the date and time of your visit, the web page you are on (commonly known as the URL) and other technical information about the IP address, browser and operating system you use will be collected by Facebook. If you are logged into Facebook, your user ID number will also be associated with the information mention…	*	*	*	No	No	*	*	Yes (' report aggregate information to our advertisers We may also use your data, or permit selected third parties to use your data, to provide you with information about goods and services which may be of interest to you and we or they may contact you about these by post or telephone.')	Yes (' report aggregate information to our advertisers We may also use your data, or permit selected third parties to use your data, to provide you with information about goods and services which may be of interest to you and we or they may contact you about these by post or telephone.')	*	*	*	*	*	*	*	*	Yes ('As stated in this Privacy Policy, SmartDroid will not sell or share your personal information with non-SmartDroid companies for their direct marketing purposes without your consent.')	Yes ('We let you choose to share information with marketers or electronic commerce providers through on-site offers. We may offer stores or provide services jointly with other companies on Finerday, and we may share customer information with that company in connection with your use of that store or service Advertisements that appear on Finerday are sometimes delivered directly to users by third p…	No	No	*
8.5g	66	16543		2		Does any policy mention opting out of data for advertising?	Yes/No	Choose Yes or No.	No	No	No	No	No	Yes ('s You have the right to ask us not to process your personal data for marketing purposes We will usually inform you (before collecting your data) if we intend to use your data for such purposes or if we intend to disclose your information to any third party for such purposes. You can exercise the right at any time by contacting us at via the contact form at www.brushdj.com.')	Yes ('s You have the right to ask us not to process your personal data for marketing purposes We will usually inform you (before collecting your data) if we intend to use your data for such purposes or if we intend to disclose your information to any third party for such purposes. You can exercise the right at any time by contacting us at via the contact form at www.brushdj.com.')	*	*	No	No	No	Yes ('You may instruct us not to process your personal information for marketing purposes. In practice, you will usually either expressly agree in advance to our use of your personal information for marketing purposes, or we will provide you with an opportunity to opt-out of the use of your personal information for marketing purposes.')	No	No	No	No	No	No	*	*	*	No	No	*	*	Yes (' If you do not want us to use your data in this way, or to pass your details on to third parties for marketing purposes, please tick the relevant box situated on the form on which we collect your data (either on an order form or registration form). You have the right to ask us not to process your personal data for marketing purposes. We will usually inform you (before collecting your data) …	Yes (' If you do not want us to use your data in this way, or to pass your details on to third parties for marketing purposes, please tick the relevant box situated on the form on which we collect your data (either on an order form or registration form). You have the right to ask us not to process your personal data for marketing purposes. We will usually inform you (before collecting your data) …	*	*	No	*	*	*	*	*	No	Yes ('s We do not provide contact information to third party marketers without your permissi Third party advertisers have no access to your contact information stored on Finerday unless you choose to share it with them.')	No	No	*
8.6a	D		4			What destination domains are used for receiving advertising data?	Comma-separated text	Type the domain(s) where the data are sent, separated by commas.	*	*	*	*	*	*	*	*	*	*	*	*	*	*	*	secure1.lateralgroup.co.uk	*	secure1.lateralgroup.co.uk, www.googleadservices.com	109.234.206.45, secure1.lateralgroup.co.uk	*	*	*	data.mobclix.com, pubads.g.doubleclick.net, showads.pubmatic.com	pubads.g.doubleclick.net, showads.pubmatic.com	*	*	*	*	*	*	*	*	*	*	*	*	googleads.g.doubleclick.net	*	*	*	*
8.6b	C		4			What are the countries of the destination domains	Comma-separated text	Type the countries where the data are sent, separated by commas.	*	*	*	*	*	*	*	*	*	*	*	*	*	*	*	GB	*	GB, US	GB	*	*	*	US	US	*	*	*	*	*	*	*	*	*	*	*	*	US	*	*	*	*
8.6c	X		4			Are tracking cookies used?	Yes/No	Choose Yes or No.	*	*	*	*	*	*	*	*	*	*	*	*	*	*	*	*	*	*	*	*	*	*	*	*	*	*	*	*	*	*	*	*	*	*	*	*	*	*	*	*	*
8.6d	V		4			All destination domains associated with advertising (not just those to which recognised data are transmitted).	Comma-separated text	Type the domain(s) where the data are sent, separated by commas.	*	*	*	*	www.google.co.uk	*	*	*	*	www.apple.com	*	*	www.carepair.co.uk	*	*	secure1.lateralgroup.co.uk	*	secure1.lateralgroup.co.uk, www.googleadservices.com	109.234.206.45, secure1.lateralgroup.co.uk	*	*	*	ad.doubleclick.net, data.mobclix.com, googleads.g.doubleclick.net, pubads.g.doubleclick.net, showads.pubmatic.com, www.googletagservices.com	pubads.g.doubleclick.net, showads.pubmatic.com	*	*	*	*	*	*	*	*	*	*	*	*	e.admob.com, googleads.g.doubleclick.net	*	*	*	*
						If 8.1 YES, does the app transmit any of the following to online services…
8.7a	17		4			Name (First or Unspecified)	Yes/No	Choose Yes or No.	*	*	*	*	*	*	*	*	*	*	*	*	*	*	*	*	*	*	*	*	*	*	*	*	*	*	*	*	*	*	*	*	*	*	*	*	*	*	*	*	*
8.7b	18		4			Full Name	Yes/No	Choose Yes or No.	*	*	*	*	*	*	*	*	*	*	*	*	*	*	*	*	*	*	*	*	*	*	*	*	*	*	*	*	*	*	*	*	*	*	*	*	*	*	*	*	*
8.7c	19		4			Age or Year of Birth	Yes/No	Choose Yes or No.	*	*	*	*	*	*	*	*	*	*	*	*	*	*	*	*	*	*	*	*	*	*	*	*	*	*	*	*	*	*	*	*	*	*	*	*	*	*	*	*	*
8.7d	20		4			Date of Birth	Yes/No	Choose Yes or No.	*	*	*	*	*	*	*	*	*	*	*	*	*	*	*	*	*	*	*	*	*	*	*	*	*	*	*	*	*	*	*	*	*	*	*	*	*	*	*	*	*
8.7e	21		4			Gender	Yes/No	Choose Yes or No.	*	*	*	*	*	*	*	*	*	*	*	*	*	*	*	*	*	*	*	*	*	*	*	*	*	*	*	*	*	*	*	*	*	*	*	*	*	*	*	*	*
8.7f	22		4			Ethnicity	Yes/No	Choose Yes or No.	*	*	*	*	*	*	*	*	*	*	*	*	*	*	*	*	*	*	*	*	*	*	*	*	*	*	*	*	*	*	*	*	*	*	*	*	*	*	*	*	*
8.7g	23		4			Sexuality	Yes/No	Choose Yes or No.	*	*	*	*	*	*	*	*	*	*	*	*	*	*	*	*	*	*	*	*	*	*	*	*	*	*	*	*	*	*	*	*	*	*	*	*	*	*	*	*	*
8.7h	24		4			Political Affiliation	Yes/No	Choose Yes or No.	*	*	*	*	*	*	*	*	*	*	*	*	*	*	*	*	*	*	*	*	*	*	*	*	*	*	*	*	*	*	*	*	*	*	*	*	*	*	*	*	*
8.7i	25		4			Religious Beliefs	Yes/No	Choose Yes or No.	*	*	*	*	*	*	*	*	*	*	*	*	*	*	*	*	*	*	*	*	*	*	*	*	*	*	*	*	*	*	*	*	*	*	*	*	*	*	*	*	*
8.7j	26		4			Employment Status	Yes/No	Choose Yes or No.	*	*	*	*	*	*	*	*	*	*	*	*	*	*	*	*	*	*	*	*	*	*	*	*	*	*	*	*	*	*	*	*	*	*	*	*	*	*	*	*	*
8.7k	27		4			Disability Status	Yes/No	Choose Yes or No.	*	*	*	*	*	*	*	*	*	*	*	*	*	*	*	*	*	*	*	*	*	*	*	*	*	*	*	*	*	*	*	*	*	*	*	*	*	*	*	*	*
8.7l	28		4			Postal Address	Yes/No	Choose Yes or No.	*	*	*	*	*	*	*	*	*	*	*	*	*	*	*	*	*	*	*	*	*	*	*	*	*	*	*	*	*	*	*	*	*	*	*	*	*	*	*	*	*
8.7ar						Full Postcode	Yes/No	Choose Yes or No.	*	*	*	*	*	*	*	*	*	*	*	*	*	*	*	*	*	*	*	*	*	*	*	*	*	*	*	*	*	*	*	*	*	*	*	*	*	*	*	*	*
8.7m	29		4			Country or Area or Partial Postcode	Yes/No	Choose Yes or No.	*	*	*	*	*	*	*	*	*	*	*	*	*	*	*	*	*	*	*	*	*	*	*	*	*	*	*	*	*	*	*	*	*	*	*	*	*	*	*	*	*
8.7n	30		4			Geolocation	Yes/No	Choose Yes or No.	*	*	*	*	*	*	*	*	*	*	*	*	*	*	*	*	*	*	*	*	*	*	*	*	*	*	*	*	*	*	*	*	*	*	*	*	*	*	*	*	*
8.7o	31		4			Email Address	Yes/No	Choose Yes or No.	*	*	*	*	*	*	*	*	*	*	*	*	*	*	*	Yes (HTTPS)	*	Yes (HTTPS)	Yes (HTTPS)	*	*	*	*	*	*	*	*	*	*	*	*	*	*	*	*	*	*	*	*	*	*
8.7p	32		4			Telephone Numbers	Yes/No	Choose Yes or No.	*	*	*	*	*	*	*	*	*	*	*	*	*	*	*	*	*	*	*	*	*	*	*	*	*	*	*	*	*	*	*	*	*	*	*	*	*	*	*	*	*
8.7q	33		4			Username	Yes/No	Choose Yes or No.	*	*	*	*	*	*	*	*	*	*	*	*	*	*	*	*	*	*	*	*	*	*	*	*	*	*	*	*	*	*	*	*	*	*	*	*	*	*	*	*	*
8.7s	34		4			Password	Yes/No	Choose Yes or No.	*	*	*	*	*	*	*	*	*	*	*	*	*	*	*	*	*	*	*	*	*	*	*	*	*	*	*	*	*	*	*	*	*	*	*	*	*	*	*	*	*
8.7t	35		4			Medical System Numbers	Yes/No	Choose Yes or No.	*	*	*	*	*	*	*	*	*	*	*	*	*	*	*	*	*	*	*	*	*	*	*	*	*	*	*	*	*	*	*	*	*	*	*	*	*	*	*	*	*
8.7u	36		4			Social Security Number	Yes/No	Choose Yes or No.	*	*	*	*	*	*	*	*	*	*	*	*	*	*	*	*	*	*	*	*	*	*	*	*	*	*	*	*	*	*	*	*	*	*	*	*	*	*	*	*	*
8.7v	37		4			Hobbies and Interests	Yes/No	Choose Yes or No.	*	*	*	*	*	*	*	*	*	*	*	*	*	*	*	*	*	*	*	*	*	*	*	*	*	*	*	*	*	*	*	*	*	*	*	*	*	*	*	*	*
8.7x	38		4			Measured Health Parameters	Yes/No	Choose Yes or No.	*	*	*	*	*	*	*	*	*	*	*	*	*	*	*	*	*	*	*	*	*	*	*	*	*	*	*	*	*	*	*	*	*	*	*	*	*	*	*	*	*
8.7y	39		4			Medical History	Yes/No	Choose Yes or No.	*	*	*	*	*	*	*	*	*	*	*	*	*	*	*	*	*	*	*	*	*	*	*	*	*	*	*	*	*	*	*	*	*	*	*	*	*	*	*	*	*
8.7z	40		4			HIV Status	Yes/No	Choose Yes or No.	*	*	*	*	*	*	*	*	*	*	*	*	*	*	*	*	*	*	*	*	*	*	*	*	*	*	*	*	*	*	*	*	*	*	*	*	*	*	*	*	*
8.7aa	41		4			Mental Health Status	Yes/No	Choose Yes or No.	*	*	*	*	*	*	*	*	*	*	*	*	*	*	*	*	*	*	*	*	*	*	*	*	*	*	*	*	*	*	*	*	*	*	*	*	*	*	*	*	*
8.7ab	42		4			Medications	Yes/No	Choose Yes or No.	*	*	*	*	*	*	*	*	*	*	*	*	*	*	*	*	*	*	*	*	*	*	*	*	*	*	*	*	*	*	*	*	*	*	*	*	*	*	*	*	*
8.7ac	43		4			Substance Use	Yes/No	Choose Yes or No.	*	*	*	*	*	*	*	*	*	*	*	*	*	*	*	*	*	*	*	*	*	*	*	*	*	*	*	*	*	*	*	*	*	*	*	*	*	*	*	*	*
8.7ad	44		4			Genetic Information	Yes/No	Choose Yes or No.	*	*	*	*	*	*	*	*	*	*	*	*	*	*	*	*	*	*	*	*	*	*	*	*	*	*	*	*	*	*	*	*	*	*	*	*	*	*	*	*	*
8.7ae	45		4			IVF Information	Yes/No	Choose Yes or No.	*	*	*	*	*	*	*	*	*	*	*	*	*	*	*	*	*	*	*	*	*	*	*	*	*	*	*	*	*	*	*	*	*	*	*	*	*	*	*	*	*
8.7af	46		4			Photographs of People	Yes/No	Choose Yes or No.	*	*	*	*	*	*	*	*	*	*	*	*	*	*	*	*	*	*	*	*	*	*	*	*	*	*	*	*	*	*	*	*	*	*	*	*	*	*	*	*	*
8.7ag	47		4			Other Photographs	Yes/No	Choose Yes or No.	*	*	*	*	*	*	*	*	*	*	*	*	*	*	*	*	*	*	*	*	*	*	*	*	*	*	*	*	*	*	*	*	*	*	*	*	*	*	*	*	*
8.7ah	48		4			Social Network Credentials	Yes/No	Choose Yes or No.	*	*	*	*	*	*	*	*	*	*	*	*	*	*	*	*	*	*	*	*	*	*	*	*	*	*	*	*	*	*	*	*	*	*	*	*	*	*	*	*	*
8.7ai	49		4			Others' Contact Details	Yes/No	Choose Yes or No.	*	*	*	*	*	*	*	*	*	*	*	*	*	*	*	*	*	*	*	*	*	*	*	*	*	*	*	*	*	*	*	*	*	*	*	*	*	*	*	*	*
8.7aj	50		4			Others Email Addresses	Yes/No	Choose Yes or No.	*	*	*	*	*	*	*	*	*	*	*	*	*	*	*	*	*	*	*	*	*	*	*	*	*	*	*	*	*	*	*	*	*	*	*	*	*	*	*	*	*
8.7ak	51		4			User Generated Content Not Previously Covered	Yes/No	Choose Yes or No.	*	*	*	*	*	*	*	*	*	*	*	*	*	*	*	*	*	*	*	*	*	*	*	*	*	*	*	*	*	*	*	*	*	*	*	*	*	*	*	*	*
8.7al	52		4			Usage Data	Yes/No	Choose Yes or No.	*	*	*	*	*	*	*	*	*	*	*	*	*	*	*	*	*	*	*	*	*	*	Yes (HTTP)	Yes (HTTP)	*	*	*	*	*	*	*	*	*	*	*	*	*	*	*	*	*
8.7am	89		4			Device Unique Identifier	Yes/No	Choose Yes or No.	*	*	*	*	*	*	*	*	*	*	*	*	*	*	*	*	*	*	*	*	*	*	Yes (HTTP)	*	*	*	*	*	*	*	*	*	*	*	*	*	*	*	*	*	*
8.7an	91		4			Other Unique Identifier	Yes/No	Choose Yes or No.	*	*	*	*	*	*	*	*	*	*	*	*	*	*	*	*	*	*	*	*	*	*	Yes (HTTP)	Yes (HTTP)	*	*	*	*	*	*	*	*	*	*	*	*	Yes (HTTP)	*	*	*	*
8.7ao	92		4			Device Characteristics	Yes/No	Choose Yes or No.	*	*	*	*	*	*	*	*	*	*	*	*	*	*	*	Yes (HTTP)	*	Yes (HTTP)	Yes (HTTP)	*	*	*	Yes (HTTP)	Yes (HTTP)	*	*	*	*	*	*	*	*	*	*	*	*	Yes (HTTP)	*	*	*	*
8.7ap	93		4			IP Address	Yes/No	Choose Yes or No.	*	*	*	*	*	*	*	*	*	*	*	*	*	*	*	Yes (HTTP)	*	Yes (HTTP)	Yes (HTTP)	*	*	*	Yes (HTTP)	Yes (HTTP)	*	*	*	*	*	*	*	*	*	*	*	*	Yes (HTTP)	*	*	*	*
8.7aq	94		4			Financial/Payment Details	Yes/No	Choose Yes or No.	*	*	*	*	*	*	*	*	*	*	*	*	*	*	*	*	*	*	*	*	*	*	*	*	*	*	*	*	*	*	*	*	*	*	*	*	*	*	*	*	*
Analytics or Feedback
9.1a						Does the app transmit data to analytic services or for feedback?	Yes/No	Choose Yes if the data are sent to a third party advertiser.	No	No	No	Yes	Yes	No	Yes	Yes	No	Yes	Yes	No	No	No	No	No	No	No	No	Yes	Yes	Yes	Yes	Yes	No	No	Yes	Yes	No	No	Yes	No	No	No	No	No	No	No	No	No	No
						If 9.1a YES…
9.1b	S		8			What analytics services are used?	Comma-separated text	Type the names of the analytics services to which the app sends data.	*	*	*	2o7.net	2o7.net	*	2.18.190.216, Urban Airship	Google Analytics	*	Flurry	Flurry	*	*	*	*	*	*	*	*	TestFlight	buzztouch.com	buzztouch.com	Flurry, Google, Google Analytics	Flurry	*	*	Flurry	Flurry	*	*	anscamobile.com	*	*	*	*	*	*	*	*	*	*
9.2a						Can users opt-out of analytics or feedback?	Pick from list	Choose the mechanism by which users can opt-out of analytics.	*	*	*	*	*	*	*	*	*	*	*	*	*	*	*	*	*	*	*	*	*	*	*	*	*	*	No	No	*	*	No	No	*	*	*	*	*	*	*	*	*
9.3a	69	1		2		Does the privacy policy mention transmission of data for analytics or feedback?	Yes/No	Choose Yes or No.	Yes (Web='NAM uses Google Analytics to track how this website is used. Google Analytics uses cookies to help gather statistics on how people use this website. For example, which country the user is from, and which pages you visit while on the website. We use this information in several ways. For example, we look at how our website is being used so we can assess how well it is working and to help …	Yes (Web='Continuous logs are maintained of The Aspergillus Website web server activity. These log files include the details of your IP address, browser type, page last visited etc. Log files are used to analyse usage of The Aspergillus Website, and may be kept in an anonymised form for historical records.')	Yes (Web='Continuous logs are maintained of The Aspergillus Website web server activity. These log files include the details of your IP address, browser type, page last visited etc. Log files are used to analyse usage of The Aspergillus Website, and may be kept in an anonymised form for historical records.')	Yes (Web='We use cookies to help us see how people are using our sites. These are known as ‘analytics cookies’, ‘tracking cookies’ or ‘web beacons’. We use analytics cookies: In addition, when we email you, we may place a tiny tag (also known as ‘tracking pixel’ or ‘web beacon’) on the email we send out. These do not collect any personal information, but they let us know how many people are openi…	Yes (Web='We use cookies to help us see how people are using our sites. These are known as ‘analytics cookies’, ‘tracking cookies’ or ‘web beacons’. We use analytics cookies: In addition, when we email you, we may place a tiny tag (also known as ‘tracking pixel’ or ‘web beacon’) on the email we send out. These do not collect any personal information, but they let us know how many people are openi…	Yes (Web='We may also ask you to complete surveys that we use for research purposes, although you do not have to respond to them.')	Yes (Web='We may also ask you to complete surveys that we use for research purposes, although you do not have to respond to them.')	*	*	Yes (App), Yes (Web) (App=' We may use your data to: monitor, develop and improve the We may pass barcode scans, timestamps, IP addresses, geo-localization data and unique device identifiers associated with the usage of the Barcode RedLaser functionality to track overall usage however we will not include information personally identifying you. We may share some general statistical information abo…	Yes (App), Yes (Web) (App=' We may use your data to: monitor, develop and improve the We may pass barcode scans, timestamps, IP addresses, geo-localization data and unique device identifiers associated with the usage of the Barcode RedLaser functionality to track overall usage however we will not include information personally identifying you. We may share some general statistical information abo…	Yes (Web='We use Google Analytics to collect information about how people use this site. We do this to make sure it’s meeting its users’ needs and to understand how we could do it better. Google Analytics stores information about what pages you visit, how long you are on the site, how you got here and what you click on. We do not collect or store your personal information (e.g. your name or addre…	Yes (App=' information about your computer and about your visits to and use of this website (including your IP address, geographical location, browser type and version, operating system, referral source, length of visit, page views, website navigation and identifying information such as name and contact details) We use Google Analytics to analyse the use of this website. Google Analytics generate…	*	*	Yes (Web='When you access www.nhs.uk/change4life we use technology to collect information indirectly such as your Internet address which is then kept in our Internet access logs. how you entered our site, how you navigated through the site, and what information was of interest to you. We analyse it to see what is most effective about our site, to help us identify ways to improve it, and to make i…	Yes (Web='When you access www.nhs.uk/change4life we use technology to collect information indirectly such as your Internet address which is then kept in our Internet access logs. how you entered our site, how you navigated through the site, and what information was of interest to you. We analyse it to see what is most effective about our site, to help us identify ways to improve it, and to make i…	*	*	*	*	*	No	No	*	*	Yes (App), Yes (Web) (App='From November 2012 we have installed an analytics package in order to collect anonymous statistics about how the app is used. We will not, under any circumstances, give out or sell your information to anyone. We collect anonymous, non-identifying, aggregate information about app usage via Flurry Analytics in order to improve the app. T', Web=' We, or our partners or spo…	Yes (App), Yes (Web) (App='From November 2012 we have installed an analytics package in order to collect anonymous statistics about how the app is used. We will not, under any circumstances, give out or sell your information to anyone. We collect anonymous, non-identifying, aggregate information about app usage via Flurry Analytics in order to improve the app. T', Web=' We, or our partners or spo…	*	*	*	*	*	*	*	*	Yes (Web='When your computer Web browser or other communication device accesses our Web sites or wireless deck pages (SmartDroid wireless Web pages designed for access by wireless device browsers), we automatically receive certain information, such as your IP address, browser type, date and time, and the Web page you visited before visiting our site. create and improve products and services')	Yes (Web='They provide us with data that we can use to improve the quality of our service and make it easier to use. We do this for purposes such as aggregating and analyzing data and site usage, and to customize the site's content, layout and services')	Yes (Web=' FolUp may, however, obtain, use and disclose aggregated De-identified Information to practicing Health Care Providers or Interested Parties in order to improve quality of care. 3 FolUp makes use of IP addresses to analyze trends, administer the Website and gather broad demographic information for aggregate use. IP addresses are not linked to personally identifiable User Information cre…	Yes (Web=' FolUp may, however, obtain, use and disclose aggregated De-identified Information to practicing Health Care Providers or Interested Parties in order to improve quality of care. 3 FolUp makes use of IP addresses to analyze trends, administer the Website and gather broad demographic information for aggregate use. IP addresses are not linked to personally identifiable User Information cre…	*
9.3b						Does the app mention transmission of data for analytics or feedback?	Yes/No	Choose Yes or No.	*	*	*	*	*	*	*	*	*	*	*	*	*	*	*	*	*	*	*	*	*	*	*	*	*	*	Yes	Yes	*	*	Yes	Yes	*	*	*	*	*	*	*	*	*
9.3c						Does the app mention transmission of data for analytics or feedback prominently on first use?	Yes/No	Choose Yes or No.	*	*	*	*	*	*	*	*	*	*	*	*	*	*	*	*	*	*	*	*	*	*	*	*	*	*	No	No	*	*	No	No	*	*	*	*	*	*	*	*	*
9.3d	69	16384		2		Does the app description mention transmission of data for analytics or feedback?	Yes/No	Choose Yes or No.	No	No	No	No	No	No	No	No	No	No	No	No	No	*	*	No	No	*	*	No	No	No	No	No	No	Yes (' The data collected by this app is used only for the purposes of performing the calculation, and is not saved or shared with anyone.')	No	No	*	*	Yes ('Drinks Meter stores the anonymous data from all submissions and compiles an ever-growing database which future results are then compared to, to build a picture of how people are drinking around the world')	Yes ('Drinks Meter stores the anonymous data from all submissions and compiles an ever-growing database which future results are then compared to, to build a picture of how people are drinking around the world.')	No	*	No	No	No	No	*	No	*
9.4a	71	16543		2		Does any policy mention opting out of data for analytics/research?	Yes/No	Choose Yes or No.	No	No	No	No	No	Yes (', although you do not have to respond to them')	Yes (', although you do not have to respond to them')	*	*	No	No	No	Yes ('Most browsers allow you to reject all cookies, whilst some browsers allow you to reject just third party cookies. For example, in Internet Explorer you can refuse all cookies by clicking "Tools", "Internet Options", "Privacy", and selecting "Block all cookies" using the sliding selector. Blocking all cookies will, however, have a negative impact upon the usability of many websites, includin…	*	*	Yes ('(If you are uncomfortable regarding cookies use, please keep in mind you can disable cookies on your computer by changing the settings in preferences or options menu in your browser.')	Yes ('(If you are uncomfortable regarding cookies use, please keep in mind you can disable cookies on your computer by changing the settings in preferences or options menu in your browser.')	*	*	*	*	*	No	No	*	*	Yes ('h you do not have to respond to them')	Yes ('h you do not have to respond to them')	*	*	No	*	*	*	*	*	No	Yes ('If you'd prefer, you can set yours to refuse cookies. However, you may not be able to take full advantage of our web site if you do so.')	Yes (' withdrawing his/her consent to the Processing of any Information supplied by the User for purposes of the Services. 14.2. If at any time, a User wishes to discontinue making use of the Website, please contact us or email us at www.folup.com following which the User’s User IDs and User account will be disabled.')	Yes (' withdrawing his/her consent to the Processing of any Information supplied by the User for purposes of the Services. 14.2. If at any time, a User wishes to discontinue making use of the Website, please contact us or email us at www.folup.com following which the User’s User IDs and User account will be disabled.')	*
9.5a	D		8			What destination domains are used for receiving analytics data?	Comma-separated text	Type the domain(s) where the data are sent, separated by commas.	*	*	*	britishheartfoundation.122.2o7.net	britishheartfoundation.122.2o7.net	*	2.18.190.216, combine.urbanairship.com	www.google-analytics.com	*	data.flurry.com	data.flurry.com	*	*	*	*	*	*	*	*	e3e2d9a3682dabc168c7ec3401e4d3d53dbc5dbd.sdk.testflightapp.com	www.buzztouch.com	www.buzztouch.com	ajax.googleapis.com, data.flurry.com, www.google-analytics.com	data.flurry.com	*	*	data.flurry.com	data.flurry.com	*	*	stats.anscamobile.com	*	*	*	*	*	*	*	*	*	*
9.5b	C		8			What are the countries of the destination domains	Comma-separated text	Type the countries where the data are sent, separated by commas.	*	*	*	US	US	*	GB, US	US	*	US	US	*	*	*	*	*	*	*	*	US	US	US	US	US	*	*	US	US	*	*	US	*	*	*	*	*	*	*	*	*	*
9.5c	X		8			Are tracking cookies used?	Yes/No	Choose Yes or No.	*	*	*	*	*	*	*	*	*	*	*	*	*	*	*	*	*	*	*	*	*	*	*	*	*	*	*	*	*	*	*	*	*	*	*	*	*	*	*	*	*
9.5d	V		8			All destination domains associated with analytics services (not just those to which recognised data are transmitted).	Comma-separated text	Type the domain(s) where the data are sent, separated by commas.	*	*	*	britishheartfoundation.122.2o7.net, survey.112.2o7.net	britishheartfoundation.122.2o7.net, metrics.bhf.org.uk, www.google-analytics.com	*	2.18.126.216, 2.18.190.216, 23.14.222.216, 23.195.30.216, 23.74.126.216, boxoffice.urbanairship.com, combine.urbanairship.com	*	*	data.flurry.com	data.flurry.com	*	*	*	*	*	*	*	*	e3e2d9a3682dabc168c7ec3401e4d3d53dbc5dbd.sdk.testflightapp.com	www.buzztouch.com	www.buzztouch.com	ajax.googleapis.com, data.flurry.com, www.google-analytics.com	data.flurry.com	*	*	data.flurry.com	data.flurry.com	*	*	stats.anscamobile.com	*	*	*	*	*	*	*	*	*	*
						If 9.1 YES, does the app transmit any of the following to online services…
9.6a	17		8			Name (First or Unspecified)	Yes/No	Choose Yes or No.	*	*	*	*	*	*	*	*	*	*	*	*	*	*	*	*	*	*	*	*	*	*	*	*	*	*	*	*	*	*	*	*	*	*	*	*	*	*	*	*	*
9.6b	18		8			Full Name	Yes/No	Choose Yes or No.	*	*	*	*	*	*	*	*	*	*	*	*	*	*	*	*	*	*	*	*	*	*	*	*	*	*	*	*	*	*	*	*	*	*	*	*	*	*	*	*	*
9.6c	19		8			Age or Year of Birth	Yes/No	Choose Yes or No.	*	*	*	*	*	*	*	*	*	*	*	*	*	*	*	*	*	*	*	*	*	*	*	*	*	*	*	*	*	*	*	*	*	*	*	*	*	*	*	*	*
9.6d	20		8			Date of Birth	Yes/No	Choose Yes or No.	*	*	*	*	*	*	*	*	*	*	*	*	*	*	*	*	*	*	*	*	*	*	*	*	*	*	*	*	*	*	*	*	*	*	*	*	*	*	*	*	*
9.6e	21		8			Gender	Yes/No	Choose Yes or No.	*	*	*	*	*	*	*	*	*	*	*	*	*	*	*	*	*	*	*	*	*	*	*	*	*	*	*	*	*	*	*	*	*	*	*	*	*	*	*	*	*
9.6f	22		8			Ethnicity	Yes/No	Choose Yes or No.	*	*	*	*	*	*	*	*	*	*	*	*	*	*	*	*	*	*	*	*	*	*	*	*	*	*	*	*	*	*	*	*	*	*	*	*	*	*	*	*	*
9.6g	23		8			Sexuality	Yes/No	Choose Yes or No.	*	*	*	*	*	*	*	*	*	*	*	*	*	*	*	*	*	*	*	*	*	*	*	*	*	*	*	*	*	*	*	*	*	*	*	*	*	*	*	*	*
9.6h	24		8			Political Affiliation	Yes/No	Choose Yes or No.	*	*	*	*	*	*	*	*	*	*	*	*	*	*	*	*	*	*	*	*	*	*	*	*	*	*	*	*	*	*	*	*	*	*	*	*	*	*	*	*	*
9.6i	25		8			Religious Beliefs	Yes/No	Choose Yes or No.	*	*	*	*	*	*	*	*	*	*	*	*	*	*	*	*	*	*	*	*	*	*	*	*	*	*	*	*	*	*	*	*	*	*	*	*	*	*	*	*	*
9.6j	26		8			Employment Status	Yes/No	Choose Yes or No.	*	*	*	*	*	*	*	*	*	*	*	*	*	*	*	*	*	*	*	*	*	*	*	*	*	*	*	*	*	*	*	*	*	*	*	*	*	*	*	*	*
9.6k	27		8			Disability Status	Yes/No	Choose Yes or No.	*	*	*	*	*	*	*	*	*	*	*	*	*	*	*	*	*	*	*	*	*	*	*	*	*	*	*	*	*	*	*	*	*	*	*	*	*	*	*	*	*
9.6l	28		8			Postal Address	Yes/No	Choose Yes or No.	*	*	*	*	*	*	*	*	*	*	*	*	*	*	*	*	*	*	*	*	*	*	*	*	*	*	*	*	*	*	*	*	*	*	*	*	*	*	*	*	*
9.6ar						Full Postcode	Yes/No	Choose Yes or No.	*	*	*	*	*	*	*	*	*	*	*	*	*	*	*	*	*	*	*	*	*	*	*	*	*	*	*	*	*	*	*	*	*	*	*	*	*	*	*	*	*
9.6m	29		8			Country or Area or Partial Postcode	Yes/No	Choose Yes or No.	*	*	*	*	Yes (HTTP)	*	*	*	*	Yes (HTTP)	Yes (HTTP)	*	*	*	*	*	*	*	*	Yes (HTTPS)	*	*	Yes (HTTP)	Yes (HTTP)	*	*	Yes (HTTP)	Yes (HTTP)	*	*	*	*	*	*	*	*	*	*	*	*	*
9.6n	30		8			Geolocation	Yes/No	Choose Yes or No.	*	*	*	*	*	*	*	*	*	*	*	*	*	*	*	*	*	*	*	*	Yes (HTTP)	*	*	*	*	*	*	*	*	*	*	*	*	*	*	*	*	*	*	*	*
9.6o	31		8			Email Address	Yes/No	Choose Yes or No.	*	*	*	*	*	*	*	*	*	*	*	*	*	*	*	*	*	*	*	*	*	*	*	*	*	*	*	*	*	*	*	*	*	*	*	*	*	*	*	*	*
9.6p	32		8			Telephone Numbers	Yes/No	Choose Yes or No.	*	*	*	*	*	*	*	*	*	*	*	*	*	*	*	*	*	*	*	*	*	*	*	*	*	*	*	*	*	*	*	*	*	*	*	*	*	*	*	*	*
9.6q	33		8			Username	Yes/No	Choose Yes or No.	*	*	*	*	*	*	*	*	*	*	*	*	*	*	*	*	*	*	*	*	*	*	*	*	*	*	*	*	*	*	*	*	*	*	*	*	*	*	*	*	*
9.6s	34		8			Password	Yes/No	Choose Yes or No.	*	*	*	*	*	*	*	*	*	*	*	*	*	*	*	*	*	*	*	*	*	*	*	*	*	*	*	*	*	*	*	*	*	*	*	*	*	*	*	*	*
9.6t	35		8			Medical System Numbers	Yes/No	Choose Yes or No.	*	*	*	*	*	*	*	*	*	*	*	*	*	*	*	*	*	*	*	*	*	*	*	*	*	*	*	*	*	*	*	*	*	*	*	*	*	*	*	*	*
9.6u	36		8			Social Security Number	Yes/No	Choose Yes or No.	*	*	*	*	*	*	*	*	*	*	*	*	*	*	*	*	*	*	*	*	*	*	*	*	*	*	*	*	*	*	*	*	*	*	*	*	*	*	*	*	*
9.6v	37		8			Hobbies and Interests	Yes/No	Choose Yes or No.	*	*	*	*	*	*	*	*	*	*	*	*	*	*	*	*	*	*	*	*	*	*	*	*	*	*	*	*	*	*	*	*	*	*	*	*	*	*	*	*	*
9.6x	38		8			Measured Health Parameters	Yes/No	Choose Yes or No.	*	*	*	*	*	*	*	*	*	*	*	*	*	*	*	*	*	*	*	*	*	*	*	*	*	*	*	*	*	*	*	*	*	*	*	*	*	*	*	*	*
9.6y	39		8			Medical History	Yes/No	Choose Yes or No.	*	*	*	*	*	*	*	*	*	*	*	*	*	*	*	*	*	*	*	*	*	*	*	*	*	*	*	*	*	*	*	*	*	*	*	*	*	*	*	*	*
9.6z	40		8			HIV Status	Yes/No	Choose Yes or No.	*	*	*	*	*	*	*	*	*	*	*	*	*	*	*	*	*	*	*	*	*	*	*	*	*	*	*	*	*	*	*	*	*	*	*	*	*	*	*	*	*
9.6aa	41		8			Mental Health Status	Yes/No	Choose Yes or No.	*	*	*	*	*	*	*	*	*	*	*	*	*	*	*	*	*	*	*	*	*	*	*	*	*	*	*	*	*	*	*	*	*	*	*	*	*	*	*	*	*
9.6ab	42		8			Medications	Yes/No	Choose Yes or No.	*	*	*	*	*	*	*	*	*	*	*	*	*	*	*	*	*	*	*	*	*	*	*	*	*	*	*	*	*	*	*	*	*	*	*	*	*	*	*	*	*
9.6ac	43		8			Substance Use	Yes/No	Choose Yes or No.	*	*	*	*	*	*	*	*	*	*	*	*	*	*	*	*	*	*	*	*	*	*	*	*	*	*	*	*	*	*	*	*	*	*	*	*	*	*	*	*	*
9.6ad	44		8			Genetic Information	Yes/No	Choose Yes or No.	*	*	*	*	*	*	*	*	*	*	*	*	*	*	*	*	*	*	*	*	*	*	*	*	*	*	*	*	*	*	*	*	*	*	*	*	*	*	*	*	*
9.6ae	45		8			IVF Information	Yes/No	Choose Yes or No.	*	*	*	*	*	*	*	*	*	*	*	*	*	*	*	*	*	*	*	*	*	*	*	*	*	*	*	*	*	*	*	*	*	*	*	*	*	*	*	*	*
9.6af	46		8			Photographs of People	Yes/No	Choose Yes or No.	*	*	*	*	*	*	*	*	*	*	*	*	*	*	*	*	*	*	*	*	*	*	*	*	*	*	*	*	*	*	*	*	*	*	*	*	*	*	*	*	*
9.6ag	47		8			Other Photographs	Yes/No	Choose Yes or No.	*	*	*	*	*	*	*	*	*	*	*	*	*	*	*	*	*	*	*	*	*	*	*	*	*	*	*	*	*	*	*	*	*	*	*	*	*	*	*	*	*
9.6ah	48		8			Social Network Credentials	Yes/No	Choose Yes or No.	*	*	*	*	*	*	*	*	*	*	*	*	*	*	*	*	*	*	*	*	*	*	*	*	*	*	*	*	*	*	*	*	*	*	*	*	*	*	*	*	*
9.6ai	49		8			Others' Contact Details	Yes/No	Choose Yes or No.	*	*	*	*	*	*	*	*	*	*	*	*	*	*	*	*	*	*	*	*	*	*	*	*	*	*	*	*	*	*	*	*	*	*	*	*	*	*	*	*	*
9.6aj	50		8			Others Email Addresses	Yes/No	Choose Yes or No.	*	*	*	*	*	*	*	*	*	*	*	*	*	*	*	*	*	*	*	*	*	*	*	*	*	*	*	*	*	*	*	*	*	*	*	*	*	*	*	*	*
9.6ak	51		8			User Generated Content Not Previously Covered	Yes/No	Choose Yes or No.	*	*	*	*	*	*	*	*	*	*	*	*	*	*	*	*	*	*	*	*	*	*	*	*	*	*	*	*	*	*	*	*	*	*	*	*	*	*	*	*	*
9.6al	52		8			Usage Data	Yes/No	Choose Yes or No.	*	*	*	Yes (HTTP)	Yes (HTTP)	*	Yes (HTTPS)	Yes (HTTP)	*	Yes (HTTP)	*	*	*	*	*	*	*	*	*	Yes (HTTPS)	*	Yes (HTTP)	Yes (HTTP)	*	*	*	Yes (HTTP)	*	*	*	Yes (HTTPS)	*	*	*	*	*	*	*	*	*	*
9.6am	89		8			Device Unique Identifier	Yes/No	Choose Yes or No.	*	*	*	Yes (HTTP)	*	*	*	*	*	*	*	*	*	*	*	*	*	*	*	Yes (HTTPS)	*	*	Yes (HTTP)	*	*	*	*	Yes (HTTP)	*	*	*	*	*	*	*	*	*	*	*	*	*
9.6an	91		8			Other Unique Identifier	Yes/No	Choose Yes or No.	*	*	*	*	*	*	Yes (HTTPS)	*	*	*	*	*	*	*	*	*	*	*	*	Yes (HTTPS)	Yes (HTTP)	*	Yes (HTTP)	*	*	*	Yes (HTTP)	*	*	*	Yes (HTTPS)	*	*	*	*	*	*	*	*	*	*
9.6ao	92		8			Device Characteristics	Yes/No	Choose Yes or No.	*	*	*	Yes (HTTP)	Yes (HTTP)	*	Yes (HTTPS)	Yes (HTTP)	*	Yes (HTTP)	Yes (HTTP)	*	*	*	*	*	*	*	*	Yes (HTTPS)	Yes (HTTP)	Yes (HTTP)	Yes (HTTP)	Yes (HTTP)	*	*	Yes (HTTP)	Yes (HTTP)	*	*	Yes (HTTPS)	*	*	*	*	*	*	*	*	*	*
9.6ap	93		8			IP Address	Yes/No	Choose Yes or No.	*	*	*	Yes (HTTP)	Yes (HTTP)	*	Yes (HTTPS)	Yes (HTTP)	*	Yes (HTTP)	Yes (HTTP)	*	*	*	*	*	*	*	*	Yes (HTTPS)	Yes (HTTP)	Yes (HTTP)	Yes (HTTP)	Yes (HTTP)	*	*	Yes (HTTP)	Yes (HTTP)	*	*	Yes (HTTPS)	*	*	*	*	*	*	*	*	*	*
9.6aq	94		8			Financial/Payment Details	Yes/No	Choose Yes or No.	*	*	*	*	*	*	*	*	*	*	*	*	*	*	*	*	*	*	*	*	*	*	*	*	*	*	*	*	*	*	*	*	*	*	*	*	*	*	*	*	*
Links and data requests
10.1a						Can the app load data from external services e.g. API calls, loading data in a browser or map?	Yes/No	Choose Yes if the app loads data from external services.	Yes	No	Yes	Yes	Yes	No	Yes	Yes	Yes	No	No	No	No	No	No	Yes	Yes	Yes	Yes	No	Yes	Yes	Yes	Yes	Yes	Yes	Yes	Yes	Yes	No	Yes	No	No	No	Yes	Yes	Yes	No	No	No	No
10.1b						Does the app transmit data during loading?	Yes/No	Choose Yes if the app transmits data during laoding	Yes	No	Yes	Yes	Yes	No	Yes	Yes	Yes	No	No	No	No	No	No	Yes	Yes	Yes	Yes	No	Yes	Yes	Yes	Yes	Yes	Yes	Yes	Yes	Yes	No	Yes	No	No	No	Yes	Yes	Yes	No	No	No	No
						If 10.1 YES…
10.1b	S		194			What services does the app link to?	Comma-separated text	Type a list of the services that the app connects to and the type of connection in parentheses, separated by commas. For example: www.nhs.uk (Hosted Browser Window), www.diabetes.org.uk (Browser)	aidsmap.com	*	*	bhf.org.uk	bhf.org.uk	*	*	bathspa.ac.uk, Brightcove Video Cloud, nhs.uk	*	*	*	*	*	*	*	nhs.uk	nhs.uk	*	*	*	*	*	chango.com, eXelate Media	*	*	*	*	*	Apple	*	*	*	*	*	*	*	*	*	*	*	*
10.3a	75	1		2		Does the privacy policy mention transmission of data when loading data or opening links?	Yes/No	Choose Yes or No.	No	No	No	No	No	No	No	*	*	*	*	No	Yes (App=' information about your computer and about your visits to and use of this website (including your IP address, geographical location, browser type and version, operating system, referral source, length of visit, page views, website navigation and identifying information such as name and contact details)')	No	No	No	No	No	No	*	*	*	No	No	*	*	No	No	*	*	*	*	*	*	*	*	Yes (Web='When your computer Web browser or other communication device accesses our Web sites or wireless deck pages (SmartDroid wireless Web pages designed for access by wireless device browsers), we automatically receive certain information, such as your IP address, browser type, date and time, and the Web page you visited before visiting our site.')	No	No	No	*
10.4a	D		194			What destination domains are used for receiving analytics data?	Comma-separated text	Type the domain(s) where the data are sent, separated by commas.	www.aidsmap.com	*	*	www.bhf.org.uk	www.bhf.org.uk	*	*	admin.brightcove.com, www.nhs.uk, www2.bathspa.ac.uk	*	*	*	*	*	*	*	www.nhs.uk	www.nhs.uk	*	*	*	*	*	c.chango.com, loadm.exelator.com	*	*	*	*	*	gspa11.ls.apple.com	*	*	*	*	*	*	*	*	*	*	*	*
10.4b	C		194			What are the countries of the destination domains	Comma-separated text	Type the countries where the data are sent, separated by commas.	GB	*	*	GB	GB	*	*	GB, US	*	*	*	*	*	*	*	US	US	*	*	*	*	*	US	*	*	*	*	*	US	*	*	*	*	*	*	*	*	*	*	*	*
10.4c	X		194			Are tracking cookies used?	Yes/No	Choose Yes or No.	*	*	*	*	*	*	*	Yes (www.nhs.uk, www2.bathspa.ac.uk)	*	*	*	*	*	*	*	Yes	Yes	*	*	*	*	*	Yes	*	*	*	*	*	*	*	*	*	*	*	*	*	*	*	*	*	*
10.4d	V		194			All destination domains associated with data loading (not just those to which recognised data are transmitted).	Comma-separated text	Type the domain(s) where the data are sent, separated by commas.	www.aidsmap.com	*	www.aspergillus.org.uk	www.bhf.org.uk	www.bhf.org.uk	*	www.dentistinyork.co.uk	gsp1.apple.com, gspa11.ls.apple.com, gspa19.ls.apple.com, gspa21.ls.apple.com, gspa23.ls.apple.com	80.4.176.196, www.dhi-online.org.uk, www.fairfieldparkhc.co.uk, www.nhs.uk, www.offtherecord-banes.co.uk, www.ruh.nhs.uk, www.samaritans.org, www.sirona-cic.org.uk	*	*	*	*	*	*	www.nhs.uk	www.nhs.uk	befoodsmart.change4life.co.uk, registration.change4life.co.uk	befoodsmart.change4life.co.uk	*	admin.brightcove.com, www.dentalphobia.co.uk	www.dentalhealth.org, www.dentalphobia.co.uk, www.dh.gov.uk, www.nhs.uk	im.live-guru.com	www.patient.co.uk	svn.clinrisk.co.uk	www.clickinnovate.com	diabetes.org.uk	www.diabetes.org.uk	gspa11.ls.apple.com, gspa19.ls.apple.com, gspa21.ls.apple.com, gspa23.ls.apple.com	*	www.drugsmeter.com	*	*	*	systmonline.tpp-uk.com	www.mediloc8.com	csi.gstatic.com, maps.googleapis.com, maps.gstatic.com	*	*	*	*
						If 10.1 YES, does the app transmit any of the following when requesting data…
10.5a	17		194			Name (First or Unspecified)	Yes/No	Choose Yes or No.	*	*	*	*	*	*	*	*	*	*	*	*	*	*	*	*	*	*	*	*	*	*	*	*	*	*	*	*	*	*	*	*	*	*	*	*	*	*	*	*	*
10.5b	18		194			Full Name	Yes/No	Choose Yes or No.	*	*	*	*	*	*	*	*	*	*	*	*	*	*	*	*	*	*	*	*	*	*	*	*	*	*	*	*	*	*	*	*	*	*	*	*	*	*	*	*	*
10.5c	19		194			Age or Year of Birth	Yes/No	Choose Yes or No.	*	*	*	*	*	*	*	*	*	*	*	*	*	*	*	*	*	*	*	*	*	*	*	*	*	*	*	*	*	*	*	*	*	*	*	*	*	*	*	*	*
10.5d	20		194			Date of Birth	Yes/No	Choose Yes or No.	*	*	*	*	*	*	*	*	*	*	*	*	*	*	*	*	*	*	*	*	*	*	*	*	*	*	*	*	*	*	*	*	*	*	*	*	*	*	*	*	*
10.5e	21		194			Gender	Yes/No	Choose Yes or No.	*	*	*	*	*	*	*	*	*	*	*	*	*	*	*	*	*	*	*	*	*	*	*	*	*	*	*	*	*	*	*	*	*	*	*	*	*	*	*	*	*
10.5f	22		194			Ethnicity	Yes/No	Choose Yes or No.	*	*	*	*	*	*	*	*	*	*	*	*	*	*	*	*	*	*	*	*	*	*	*	*	*	*	*	*	*	*	*	*	*	*	*	*	*	*	*	*	*
10.5g	23		194			Sexuality	Yes/No	Choose Yes or No.	*	*	*	*	*	*	*	*	*	*	*	*	*	*	*	*	*	*	*	*	*	*	*	*	*	*	*	*	*	*	*	*	*	*	*	*	*	*	*	*	*
10.5h	24		194			Political Affiliation	Yes/No	Choose Yes or No.	*	*	*	*	*	*	*	*	*	*	*	*	*	*	*	*	*	*	*	*	*	*	*	*	*	*	*	*	*	*	*	*	*	*	*	*	*	*	*	*	*
10.5i	25		194			Religious Beliefs	Yes/No	Choose Yes or No.	*	*	*	*	*	*	*	*	*	*	*	*	*	*	*	*	*	*	*	*	*	*	*	*	*	*	*	*	*	*	*	*	*	*	*	*	*	*	*	*	*
10.5j	26		194			Employment Status	Yes/No	Choose Yes or No.	*	*	*	*	*	*	*	*	*	*	*	*	*	*	*	*	*	*	*	*	*	*	*	*	*	*	*	*	*	*	*	*	*	*	*	*	*	*	*	*	*
10.5k	27		194			Disability Status	Yes/No	Choose Yes or No.	*	*	*	*	*	*	*	*	*	*	*	*	*	*	*	*	*	*	*	*	*	*	*	*	*	*	*	*	*	*	*	*	*	*	*	*	*	*	*	*	*
10.5l	28		194			Postal Address	Yes/No	Choose Yes or No.	*	*	*	*	*	*	*	*	*	*	*	*	*	*	*	*	*	*	*	*	*	*	*	*	*	*	*	*	*	*	*	*	*	*	*	*	*	*	*	*	*
10.5ar						Full Postcode	Yes/No	Choose Yes or No.	*	*	*	*	*	*	*	*	*	*	*	*	*	*	*	*	*	*	*	*	*	*	*	*	*	*	*	*	*	*	*	*	*	*	*	*	*	*	*	*	*
10.5m	29		194			Country or Area or Partial Postcode	Yes/No	Choose Yes or No.	*	*	*	*	*	*	*	*	*	*	*	*	*	*	*	*	*	*	*	*	*	*	*	*	*	*	*	*	*	*	*	*	*	*	*	*	*	*	*	*	*
10.5n	30		194			Geolocation	Yes/No	Choose Yes or No.	*	*	*	*	*	*	*	*	*	*	*	*	*	*	*	*	*	*	*	*	*	*	*	*	*	*	*	*	*	*	*	*	*	*	*	*	*	*	*	*	*
10.5o	31		194			Email Address	Yes/No	Choose Yes or No.	*	*	*	*	*	*	*	*	*	*	*	*	*	*	*	*	*	*	*	*	*	*	*	*	*	*	*	*	*	*	*	*	*	*	*	*	*	*	*	*	*
10.5p	32		194			Telephone Numbers	Yes/No	Choose Yes or No.	*	*	*	*	*	*	*	*	*	*	*	*	*	*	*	*	*	*	*	*	*	*	*	*	*	*	*	*	*	*	*	*	*	*	*	*	*	*	*	*	*
10.5q	33		194			Username	Yes/No	Choose Yes or No.	*	*	*	*	*	*	*	*	*	*	*	*	*	*	*	*	*	*	*	*	*	*	*	*	*	*	*	*	*	*	*	*	*	*	*	*	*	*	*	*	*
10.5s	34		194			Password	Yes/No	Choose Yes or No.	*	*	*	*	*	*	*	*	*	*	*	*	*	*	*	*	*	*	*	*	*	*	*	*	*	*	*	*	*	*	*	*	*	*	*	*	*	*	*	*	*
10.5t	35		194			Medical System Numbers	Yes/No	Choose Yes or No.	*	*	*	*	*	*	*	*	*	*	*	*	*	*	*	*	*	*	*	*	*	*	*	*	*	*	*	*	*	*	*	*	*	*	*	*	*	*	*	*	*
10.5u	36		194			Social Security Number	Yes/No	Choose Yes or No.	*	*	*	*	*	*	*	*	*	*	*	*	*	*	*	*	*	*	*	*	*	*	*	*	*	*	*	*	*	*	*	*	*	*	*	*	*	*	*	*	*
10.5v	37		194			Hobbies and Interests	Yes/No	Choose Yes or No.	*	*	*	*	*	*	*	*	*	*	*	*	*	*	*	*	*	*	*	*	*	*	*	*	*	*	*	*	*	*	*	*	*	*	*	*	*	*	*	*	*
10.5x	38		194			Measured Health Parameters	Yes/No	Choose Yes or No.	*	*	*	*	*	*	*	*	*	*	*	*	*	*	*	*	*	*	*	*	*	*	*	*	*	*	*	*	*	*	*	*	*	*	*	*	*	*	*	*	*
10.5y	39		194			Medical History	Yes/No	Choose Yes or No.	*	*	*	*	*	*	*	*	*	*	*	*	*	*	*	*	*	*	*	*	*	*	*	*	*	*	*	*	*	*	*	*	*	*	*	*	*	*	*	*	*
10.5z	40		194			HIV Status	Yes/No	Choose Yes or No.	*	*	*	*	*	*	*	*	*	*	*	*	*	*	*	*	*	*	*	*	*	*	*	*	*	*	*	*	*	*	*	*	*	*	*	*	*	*	*	*	*
10.5aa	41		194			Mental Health Status	Yes/No	Choose Yes or No.	*	*	*	*	*	*	*	*	*	*	*	*	*	*	*	*	*	*	*	*	*	*	*	*	*	*	*	*	*	*	*	*	*	*	*	*	*	*	*	*	*
10.5ab	42		194			Medications	Yes/No	Choose Yes or No.	*	*	*	*	*	*	*	*	*	*	*	*	*	*	*	*	*	*	*	*	*	*	*	*	*	*	*	*	*	*	*	*	*	*	*	*	*	*	*	*	*
10.5ac	43		194			Substance Use	Yes/No	Choose Yes or No.	*	*	*	*	*	*	*	*	*	*	*	*	*	*	*	*	*	*	*	*	*	*	*	*	*	*	*	*	*	*	*	*	*	*	*	*	*	*	*	*	*
10.5ad	44		194			Genetic Information	Yes/No	Choose Yes or No.	*	*	*	*	*	*	*	*	*	*	*	*	*	*	*	*	*	*	*	*	*	*	*	*	*	*	*	*	*	*	*	*	*	*	*	*	*	*	*	*	*
10.5ae	45		194			IVF Information	Yes/No	Choose Yes or No.	*	*	*	*	*	*	*	*	*	*	*	*	*	*	*	*	*	*	*	*	*	*	*	*	*	*	*	*	*	*	*	*	*	*	*	*	*	*	*	*	*
10.5af	46		194			Photographs of People	Yes/No	Choose Yes or No.	*	*	*	*	*	*	*	*	*	*	*	*	*	*	*	*	*	*	*	*	*	*	*	*	*	*	*	*	*	*	*	*	*	*	*	*	*	*	*	*	*
10.5ag	47		194			Other Photographs	Yes/No	Choose Yes or No.	*	*	*	*	*	*	*	*	*	*	*	*	*	*	*	*	*	*	*	*	*	*	*	*	*	*	*	*	*	*	*	*	*	*	*	*	*	*	*	*	*
10.5ah	48		194			Social Network Credentials	Yes/No	Choose Yes or No.	*	*	*	*	*	*	*	*	*	*	*	*	*	*	*	*	*	*	*	*	*	*	*	*	*	*	*	*	*	*	*	*	*	*	*	*	*	*	*	*	*
10.5ai	49		194			Others' Contact Details	Yes/No	Choose Yes or No.	*	*	*	*	*	*	*	*	*	*	*	*	*	*	*	*	*	*	*	*	*	*	*	*	*	*	*	*	*	*	*	*	*	*	*	*	*	*	*	*	*
10.5aj	50		194			Others Email Addresses	Yes/No	Choose Yes or No.	*	*	*	*	*	*	*	*	*	*	*	*	*	*	*	*	*	*	*	*	*	*	*	*	*	*	*	*	*	*	*	*	*	*	*	*	*	*	*	*	*
10.5ak	51		194			User Generated Content Not Previously Covered	Yes/No	Choose Yes or No.	*	*	*	Yes (HTTP)	Yes (HTTP)	*	*	*	*	*	*	*	*	*	*	*	*	*	*	*	*	*	*	*	*	*	*	*	*	*	*	*	*	*	*	*	*	*	*	*	*
10.5al	52		194			Usage Data	Yes/No	Choose Yes or No.	*	*	*	*	*	*	*	Yes (HTTP)	*	*	*	*	*	*	*	Yes (HTTP)	Yes (HTTP)	*	*	*	*	*	Yes (HTTP)	*	*	*	*	*	*	*	*	*	*	*	*	*	*	*	*	*	*
10.5am	89		194			Device Unique Identifier	Yes/No	Choose Yes or No.	*	*	*	*	*	*	*	*	*	*	*	*	*	*	*	*	*	*	*	*	*	*	Yes (HTTP)	*	*	*	*	*	*	*	*	*	*	*	*	*	*	*	*	*	*
10.5an	91		194			Other Unique Identifier	Yes/No	Choose Yes or No.	*	*	*	*	*	*	*	*	*	*	*	*	*	*	*	*	*	*	*	*	*	*	Yes (HTTP)	*	*	*	*	*	Yes (HTTP)	*	*	*	*	*	*	*	*	*	*	*	*
10.5ao	92		194			Device Characteristics	Yes/No	Choose Yes or No.	Yes (HTTP)	*	Yes (HTTP)	Yes (HTTP)	Yes (HTTP)	*	Yes (HTTP)	Yes (HTTP)	Yes (HTTP)	*	*	*	*	*	*	Yes (HTTP)	Yes (HTTP)	Yes (HTTP)	Yes (HTTP)	*	Yes (HTTP)	Yes (HTTP)	Yes (HTTP)	Yes (HTTP)	Yes (HTTP)	Yes (HTTP)	Yes (HTTP)	Yes (HTTP)	Yes (HTTP)	*	Yes (HTTP)	*	*	*	Yes (HTTP)	Yes (HTTP)	Yes (HTTP)	*	*	*	*
10.5ap	93		194			IP Address	Yes/No	Choose Yes or No.	Yes (HTTP)	*	Yes (HTTP)	Yes (HTTP)	Yes (HTTP)	*	Yes (HTTP)	Yes (HTTP)	Yes (HTTP)	*	*	*	*	*	*	Yes (HTTP)	Yes (HTTP)	Yes (HTTP)	Yes (HTTP)	*	Yes (HTTP)	Yes (HTTP)	Yes (HTTP)	Yes (HTTP)	Yes (HTTP)	Yes (HTTP)	Yes (HTTP)	Yes (HTTP)	Yes (HTTP)	*	Yes (HTTP)	*	*	*	Yes (HTTP)	Yes (HTTP)	Yes (HTTP)	*	*	*	*
10.5aq	94		194			Financial/Payment Details	Yes/No	Choose Yes or No.	*	*	*	*	*	*	*	*	*	*	*	*	*	*	*	*	*	*	*	*	*	*	*	*	*	*	*	*	*	*	*	*	*	*	*	*	*	*	*	*	*
Social Media
11.1	S		1024			What social media services does the app connect to?	Comma-separated text	Type a list of the services that the app connects to and the type of connection in parentheses, separated by commas. For example: www.nhs.uk (Hosted Browser Window), www.diabetes.org.uk (Browser)	Facebook, Twitter	*	*	*	*	*	*	*	*	*	*	*	*	*	*	Facebook	*	Facebook	*	*	*	*	Facebook	*	*	*	Facebook	Facebook	*	*	*	*	*	*	*	*	*	*	*	*	*
Cookies
11.2						Cookies extracted from app caches	Yes/No		Yes	No	No	No	No	Yes	No	Yes	No	No	No	No	Yes	No	No	No	No	Yes	No	No	Yes	No	Yes	Yes	No	No	No	No	No	No	Yes	No	No	No	Yes	No	No	No	No	No	No
Quality Assurance
12.1a						Were any textual/grammatical errors found in written or multimedia informational content?	Yes/No	Pick Yes if you identified any spelling or grammar or formatting errors in the app.	*	*	*	*	*	*	*	*	*	*	*	*	*	*	*	*	*	*	*	*	*	*	*	*	*	*	*	*	*	*	*	*	*	*	*	*	*	*	*	*	*
12.1b						If 12.1a YES, provide relevant example(s)	Text	Use free text to quote any representative examples of textual errors.
12.2a						Were any textual/grammatical errors found in the user interface?	Yes/No	Pick Yes if you identified any spelling or grammar or formatting errors in the app UI.	*	*	*	*	*	*	*	*	*	*	*	*	*	*	*	*	*	*	*	*	*	*	*	*	*	*	*	*	*	*	*	*	*	*	*	*	*	*	*	*	*
12.2b						If 12.2a YES, provide relevant example(s)	Text	Use free text to quote any representative examples of textual errors.
12.3a						Were any software errors encountered during test use?	Yes/No	Pick Yes if you encountered any errors (e.g. crashes, unresponsiveness, unexpected behaviour) during testing the app. Note separate questions above for content errors.	*	*	*	*	*	*	*	*	*	*	*	*	*	*	*	*	*	*	*	*	*	*	*	*	*	*	*	*	*	*	*	*	*	*	*	*	*	*	*	*	*
12.3b						If 12.3a YES, provide details	Text	Use free text to summarise the errors.
12.4a						Were any network/resource errors encountered during use?	Yes/No	Pick Yes if you encountered any network functions did not work as expected or if any online resources used by the app are no longer available.	*	*	*	*	*	*	*	*	*	*	*	*	*	*	*	*	*	*	*	*	*	*	*	*	*	*	*	*	*	*	Yes	*	*	*	*	*	*	*	*	*	*
12.4b						If 12.4a YES, provide details	Text	Use free text to summarise the errors.																															App will not start without network connectivity
12.4a						Summary of issues	Text	Use free text to make any notes of any errors not captured above.	*	*	Privacy policy in app store doesn’t direct to privacy policy.	*	Previous ratings are not retained (although user can resubmit rating).	Reminders do not appear to work.	Privacy policy link in app store doesn't direct to privacy policy. Reminders do not appear to work.	*	*	*	*	*	*	*	*	Privacy Policy link displayed when starting app for first time only.	Privacy Policy link displayed when starting app for first time only.	*	*	*	*	*	When opening disclaimer in browser asked for current location.	When opening disclaimer in browser asked for current location.	*	*	*	*	No longer available from iTunes.	*	Disclaimer.html found in app bundle but link does not work on start screen.	Privacy policy in app store doesn't direct to privacy policy.	*	*	Online Prescriptions and Appointments button does not work.	Online Prescriptions and Appointments button does not work.	Privacy policy in app store doesn't direct to privacy policy.	App crashes when trying to access T&C. App crashed multiple times during use. Resign button does not work. Cannot upload photos without crashing app.	*	*	*
Other
13.1						Platform Discrepancies	Text	Use free text to make any notes of any differences observed between platforms (if available.)
13.2						Notes	Text	Use free text to make any notes of any issues that you think are important.	(iTunes store does not include privacy policy links.)	(iTunes store does not include privacy policy links.) Brief instructions shown on startup page.	*	(iTunes store does not include privacy policy links.). User can edit ratings after submission but cannot remove a rating.	No privacy policy link in app store. Rating requires network connection. User can share recipes by email.	Has T&C but make no mention of privacy. (iTunes store does not include privacy policy links.)	Has T&C but make no mention of privacy. Video introduction. Disclaimer on first start "Brush DJ is intended to supplement, not be a substitute for, the expertise and judgement of your dentist, hygienist, doctor or other healthcare professional."	(iTunes store does not include privacy policy links.) App info page links to app store so that user can rate app. Network connection required to access online prescriptions and load NHS content pages.	No privacy policy link in app store. User can place calls using app (to numbers listed in app) Network connection required to access online prescriptions and load NHS content pages.	(iTunes store does not include privacy policy links.) Confirmed data are synced across devices successfully.	Privacy policy link in app store. User must agree to T&C during registration.	No privacy policy link in app store.	Privacy policy displayed on startup, user must agree. App bundle includes "advertisingSpace.png" (iTunes store does not include privacy policy links.). Account must be created online at CarePair.co.uk	(iTunes store does not include privacy policy links.)	No privacy policy link in app store. Displays privacy policy on first start. User can share app via Twitter, Facebook and email.	(iTunes store does not include privacy policy links.)	No privacy policy link in app store. Displays privacy policy on first start. User can share app via Twitter, Facebook and email.	(iTunes store does not include privacy policy links.)	No privacy policy link in app store. Displays privacy policy on first start.	(iTunes store does not include privacy policy links.). Disclaimer shown on startup. App includes 'Shopping Trolley' that lists related apps from same developer.	(iTunes store does not include privacy policy links.) Network connection required to update content.	App content can be updated from online service. Network connection required to update content.	(iTunes store does not include privacy policy links.) Disclaimer displayed on first use.	(iTunes store does not include privacy policy links.) First use wizard asks about diabetes type.	(iTunes store does not include privacy policy links.)	No privacy policy link in app store. Implementation without permission from QRISK Calculated result can be shared using device services.	About Tab describes use of analytics package. (iTunes store does not include privacy policy links.)	No privacy policy link in app store. UI allows user to forget social network settings.	(iTunes store does not include privacy policy links.). Map view does not work without network connection.	Website states that "DrinkCoach can also be found on the NHS Health Apps Library. All apps hosted here have been reviewed by the NHS to ensure they are clinically safe, comply with data protection laws and trusted sources of information, such as NHS Choices." (iTunes store does not include privacy policy links.)	"Drinks meter is anonymous and confidential and dose not collect any pesronal information that could identify you." displayed on start screen. (iTunes store does not include privacy policy links.)	"It's all anonymous and confidential" on ID page. Displays "Your survey data have been saved to the drinks meter database. Thanks!" after survey has been completed, without warning.	(iTunes store does not include privacy policy links.)	(iTunes store does not include privacy policy links.)	(iTunes store does not include privacy policy links.)	Web app loads in hosted browser. No privacy policy link in app store. User can place calls using app (to phone numbers listed in app)	*	T&C displayed only on new user registration.	(iTunes store does not include privacy policy links.)	Privacy policy link in app store.	(iTunes store does not include privacy policy links.)
						Analytical Notes	Text		Content download only.			Recipe search function does not work without network connection.	Recipe search function does not work without network connection.	?Analytics data via urbanairship	?Analytics data via urbanairship	Illustrates web content hosted within app.	Illustrates web content hosted within app.		App provides barcode scanning and forum		Local cache stores password information	Posting data to HTTPs Service	Posting data to HTTPs Service	Email address sent to third party server over HTTPS as GET parameter: https://secure1.lateralgroup.co.uk/myg4l_app/getemail.svc/validate?email=. Hex encoded email address found in local storage.	Unclear requirement for email address during startup. Is persisted to file system but never appears to be sent.	*	*				Hosted windows may confuse about web security. App implements MobClix SDK	Hosted windows may confuse about web security.						Gives warning if about to be redirected to external link (e.g. click Info > HAGA link) Using NHS App Store endorsement to promote product.	App sends data including sexual orientation over HTTP connection to http://www.drugsmeter.com//dmfull/AppDataSubmission.php. App uses pseudonymisation key.	App sends data including sexual orientation over HTTP connection to http://www.drugsmeter.com//dmfull/AppDataSubmission.php. App uses pseudonymisation key.			Illustrates web content hosted within app.	Illustrates web content hosted within app.
Testing Details
14.1						Tester(s)	Pick from list		KH/JTP	KH/JTP	KH/JTP	KH/JTP	KH/JTP	KH/JTP	KH/JTP	KH/JTP	KH/JTP	KH/JTP	KH/JTP	KH/JTP	KH/JTP	KH/JTP	KH/JTP	KH/JTP	KH/JTP	KH/JTP	KH/JTP	KH/JTP	KH/JTP	KH/JTP	KH/JTP	KH/JTP	KH/JTP	KH/JTP	KH/JTP	KH/JTP	KH/JTP	KH/JTP	KH/JTP	KH/JTP	KH/JTP	KH/JTP	KH/JTP	KH/JTP	KH/JTP	KH/JTP	KH/JTP	KH/JTP	KH/JTP
						Simulated user account details…
14.3c						Email address(es)	Text		mitm28@healthapps.org.uk	*	*	mitm27@healthapps.org.uk	mitm38@healthapps.org.uk	*	*	*	*	mitm1@healthapps.org.uk, mitm1@healthapps.org.uk, mitm102@healthapps.org.uk	mitm12@healthapps.org.uk, mitm84@healthapps.org.uk, mitm94@healthapps.org.uk	*	*	mitm50@healthapps.org.uk	*	mitm51@healthapps.org.uk, mitm98@healthapps.org.uk	mitm63@healthapps.org.uk, mitm88@healthapps.org.uk.	*	mitm42@healthapps.org.uk, mitm64@healthapps.org.uk	*	*	*	*	mitm2@healthapps.org.uk	*	mitm43@healthapps.org.uk	mitm47@healthapps.org.uk	mitm13@healthapps.org.uk, mitm44@healthapps.org.uk, mitm65@healthapps.org.uk	*	*	*	*	*	mitm3@healthapps.org.uk	*	*	*	mitm61@healthapps.org.uk, mitm61@healthapps.org.uk., mitm83@healthapps.org.uk, mitm90@healthapps.org.uk	*	*	*
Calculated Properties
						Per-app transmissions
					Identifying Information (Weaker)	Name (First or Unspecified)	Yes/No		*	*	*	*	*	*	*	*	*	Yes (HTTP)	Yes (HTTP)	*	*	*	*	*	*	*	*	*	*	*	*	*	*	*	*	*	*	*	*	*	*	*	*	*	*	*	*	*	*
					Identifying Information (Strong)	Full Name	Yes/No		*	*	*	*	*	*	*	*	*	*	*	*	Yes (HTTPS)	*	*	*	*	*	*	*	*	*	*	*	*	*	*	*	*	*	*	*	*	*	*	*	*	Yes (HTTP)	*	*	*
					Identifying Information (Weaker)	Age or Year of Birth	Yes/No		*	*	*	*	*	*	*	*	*	Yes (HTTP)	Yes (HTTP)	*	*	Yes (HTTPS)	Yes (HTTPS)	*	*	*	*	*	*	*	*	*	*	*	*	*	*	*	Yes (HTTP)	Yes (HTTP)	*	*	*	*	*	*	*	*	*
					Identifying Information (Strong)	Date of Birth	Yes/No		*	*	*	*	*	*	*	*	*	*	*	*	*	*	*	*	*	*	*	*	*	*	*	*	*	*	*	*	*	*	*	*	*	*	*	*	*	Yes (HTTP)	*	*	*
					Identifying Information (Weaker)	Gender	Yes/No		*	*	*	*	*	*	*	*	*	Yes (HTTP)	Yes (HTTP)	*	*	Yes (HTTPS)	Yes (HTTPS)	*	*	*	*	*	*	*	*	*	*	*	*	*	*	*	Yes (HTTP)	Yes (HTTP)	*	*	*	*	*	Yes (HTTP)	*	*	*
					Sensitive Information (Other)	Ethnicity	Yes/No		*	*	*	*	*	*	*	*	*	*	*	*	*	*	*	*	*	*	*	*	*	*	*	*	*	*	*	*	*	*	*	*	*	*	*	*	*	*	*	*	*
					Sensitive Information (Other)	Sexuality	Yes/No		*	*	*	*	*	*	*	*	*	*	*	*	*	*	*	*	*	*	*	*	*	*	*	*	*	*	*	*	*	*	Yes (HTTP)	Yes (HTTP)	*	*	*	*	*	*	*	*	*
					Sensitive Information (Other)	Political Affiliation	Yes/No		*	*	*	*	*	*	*	*	*	*	*	*	*	*	*	*	*	*	*	*	*	*	*	*	*	*	*	*	*	*	*	*	*	*	*	*	*	*	*	*	*
					Sensitive Information (Other)	Religious Beliefs	Yes/No		*	*	*	*	*	*	*	*	*	*	*	*	*	*	*	*	*	*	*	*	*	*	*	*	*	*	*	*	*	*	*	*	*	*	*	*	*	*	*	*	*
					Sensitive Information (Other)	Employment Status	Yes/No		*	*	*	*	*	*	*	*	*	*	*	*	Yes (HTTPS)	*	*	*	*	*	*	*	*	*	*	*	*	*	*	*	*	*	Yes (HTTP)	Yes (HTTP)	*	*	*	*	*	*	*	*	*
					Sensitive Information (Medical)	Disability Status	Yes/No		*	*	*	*	*	*	*	*	*	*	*	*	*	*	*	*	*	*	*	*	*	*	*	*	*	*	*	*	*	*	*	*	*	*	*	*	*	*	*	*	*
					Identifying Information (Strong)	Postal Address	Yes/No		*	*	*	*	*	*	*	*	*	*	*	*	*	*	*	*	*	*	*	*	*	*	*	*	*	*	*	*	*	*	*	*	*	*	*	*	*	*	*	*	*
					Identifying Information (Strong)	Full Postcode	Yes/No		*	*	*	*	*	*	*	*	*	*	*	*	Yes (HTTPS)	*	*	*	*	*	*	*	*	*	*	*	*	*	*	*	*	*	*	*	*	*	*	*	*	Yes (HTTP)	*	*	*
					Identifying Information (Weaker)	Country or Area or Partial Postcode	Yes/No		*	*	*	*	Yes (HTTP)	*	*	*	*	Yes (HTTP)	Yes (HTTP)	*	*	*	*	*	*	*	*	Yes (HTTPS)	*	*	Yes (HTTP)	Yes (HTTP)	*	*	Yes (HTTP)	Yes (HTTP)	*	*	Yes (HTTP)	Yes (HTTP)	*	*	*	*	*	Yes (HTTP)	*	*	*
					Identifying Information (Weaker)	Geolocation	Yes/No		*	*	*	*	*	*	*	*	*	*	*	*	Yes (HTTPS)	*	*	*	*	*	*	*	Yes (HTTP)	*	*	*	*	*	*	*	*	*	*	*	*	*	*	*	Yes (HTTP)	*	*	*	*
					Identifying Information (Strong)	Email Address	Yes/No		*	*	*	*	*	*	*	*	*	Yes (HTTP)	Yes (HTTP)	*	Yes (HTTPS)	*	*	Yes (HTTPS)	*	Yes (HTTPS)	Yes (HTTPS)	*	*	*	*	*	*	*	*	*	*	*	*	*	*	*	*	*	*	Yes (HTTP)	*	*	*
					Identifying Information (Strong)	Telephone Numbers	Yes/No		*	*	*	*	*	*	*	*	*	*	*	*	*	*	*	*	*	*	*	*	*	*	*	*	*	*	*	*	*	*	*	*	*	*	*	*	*	*	*	*	*
					Identifying Information (Strong)	Username	Yes/No		*	*	*	*	*	*	*	*	*	Yes (HTTP)	*	*	Yes (HTTPS)	*	*	*	*	*	*	*	*	*	*	*	*	*	*	*	*	*	*	*	*	*	*	*	*	Yes (HTTP)	*	*	*
					Identifying Information (Strong)	Password	Yes/No		*	*	*	*	*	*	*	*	*	Yes (HTTP)	Yes (HTTP)	*	Yes (HTTPS)	*	*	*	*	*	*	*	*	*	*	*	*	*	*	*	*	*	*	*	*	*	*	*	*	Yes (HTTP)	*	*	*
					Identifying Information (Strong)	Medical System Numbers	Yes/No		*	*	*	*	*	*	*	*	*	*	*	*	*	*	*	*	*	*	*	*	*	*	*	*	*	*	*	*	*	*	*	*	*	*	*	*	*	*	*	*	*
					Identifying Information (Strong)	Social Security Number	Yes/No		*	*	*	*	*	*	*	*	*	*	*	*	*	*	*	*	*	*	*	*	*	*	*	*	*	*	*	*	*	*	*	*	*	*	*	*	*	*	*	*	*
					Other Information	Hobbies and Interests	Yes/No		*	*	*	*	*	*	*	*	*	*	*	*	Yes (HTTPS)	*	*	*	*	*	*	*	*	*	*	*	*	*	*	*	*	*	*	*	*	*	*	*	*	*	*	*	*
					Sensitive Information (Measurements)	Measured Health Parameters	Yes/No		*	*	*	*	*	*	*	*	*	Yes (HTTP)	Yes (HTTP)	*	*	*	*	*	*	*	*	*	*	*	*	*	*	*	*	*	*	*	*	*	*	*	*	*	*	*	*	*	*
					Sensitive Information (Medical)	Medical History	Yes/No		*	*	*	*	*	*	*	*	*	*	*	*	*	*	*	*	*	*	*	*	*	*	*	*	*	*	*	*	*	*	*	Yes (HTTP)	*	*	*	*	*	*	*	*	*
					Sensitive Information (Medical)	HIV Status	Yes/No		*	*	*	*	*	*	*	*	*	*	*	*	*	*	*	*	*	*	*	*	*	*	*	*	*	*	*	*	*	*	*	*	*	*	*	*	*	*	*	*	*
					Sensitive Information (Medical)	Mental Health Status	Yes/No		*	*	*	*	*	*	*	*	*	*	*	*	*	*	*	*	*	*	*	*	*	*	*	*	*	*	*	*	*	*	Yes (HTTP)	Yes (HTTP)	*	*	*	*	*	*	*	*	*
					Sensitive Information (Medical)	Medications	Yes/No		*	*	*	*	*	*	*	*	*	*	*	*	*	*	*	*	*	*	*	*	*	*	*	*	*	*	*	*	*	*	Yes (HTTP)	Yes (HTTP)	*	*	*	*	*	*	*	*	*
					Sensitive Information (Medical)	Substance Use	Yes/No		*	*	*	*	*	*	*	*	*	*	*	*	*	*	*	*	*	*	*	*	*	*	*	*	*	*	*	*	*	*	*	Yes (HTTP)	*	*	*	*	*	*	*	*	*
					Sensitive Information (Medical)	Genetic Information	Yes/No		*	*	*	*	*	*	*	*	*	*	*	*	*	*	*	*	*	*	*	*	*	*	*	*	*	*	*	*	*	*	*	*	*	*	*	*	*	*	*	*	*
					Sensitive Information (Medical)	IVF Information	Yes/No		*	*	*	*	*	*	*	*	*	*	*	*	*	*	*	*	*	*	*	*	*	*	*	*	*	*	*	*	*	*	*	*	*	*	*	*	*	*	*	*	*
					Identifying Information (Strong)	Photographs of People	Yes/No		*	*	*	*	*	*	*	*	*	*	*	*	*	*	*	*	*	*	*	*	*	*	*	*	*	*	*	*	*	*	*	*	*	*	*	*	*	*	*	*	*
					Other Information	Other Photographs	Yes/No		*	*	*	*	*	*	*	*	*	*	*	*	*	*	*	*	*	*	*	*	*	*	*	*	*	*	*	*	*	*	*	*	*	*	*	*	*	*	*	*	*
					Identifying Information (Strong)	Social Network Credentials	Yes/No		*	*	*	*	*	*	*	*	*	*	*	*	*	*	*	*	*	*	*	*	*	*	*	*	*	*	*	*	*	*	*	*	*	*	*	*	*	*	*	*	*
					Identifying Information (Strong)	Others' Contact Details	Yes/No		*	*	*	*	*	*	*	*	*	*	*	*	*	*	*	*	*	*	*	*	*	*	*	*	*	*	*	*	*	*	*	*	*	*	*	*	*	*	*	*	*
					Identifying Information (Strong)	Others Email Addresses	Yes/No		*	*	*	*	*	*	*	*	*	*	*	*	*	*	*	*	*	*	*	*	*	*	*	*	*	*	*	*	*	*	*	*	*	*	*	*	*	*	*	*	*
					Other Information	User Generated Content Not Previously Covered	Yes/No		*	*	*	Yes (HTTP)	Yes (HTTP)	*	*	*	*	Yes (HTTP)	Yes (HTTP)	*	*	*	*	*	*	*	*	*	*	*	*	*	*	*	*	*	*	*	Yes (HTTP)	Yes (HTTP)	*	*	*	*	*	*	*	*	*
					Analytics Data	Usage Data	Yes/No		*	*	*	Yes (HTTP)	Yes (HTTP)	*	Yes (HTTPS)	Yes (HTTP)	*	Yes (HTTP)	*	*	Yes (HTTPS)	Yes (HTTPS)	Yes (HTTPS)	Yes (HTTP)	Yes (HTTP)	Yes (HTTPS)	Yes (HTTPS)	Yes (HTTPS)	*	Yes (HTTP)	Yes (HTTP)	Yes (HTTP)	*	*	Yes (HTTP)	*	*	*	Yes (HTTPS)	*	*	*	*	*	*	*	*	*	*
					Identifying Information (Strong)	Device Unique Identifier	Yes/No		*	*	*	Yes (HTTP)	*	*	*	*	*	*	*	*	*	*	*	*	*	*	*	Yes (HTTPS)	*	*	Yes (HTTP)	*	*	*	*	Yes (HTTP)	*	*	*	*	*	*	*	*	*	*	*	*	*
					Identifying Information (Weaker)	Other Unique Identifier	Yes/No		*	*	*	*	*	*	Yes (HTTPS)	*	*	Yes (HTTP)	Yes (HTTP)	*	*	Yes (HTTPS)	Yes (HTTPS)	*	*	Yes (HTTPS)	Yes (HTTPS)	Yes (HTTPS)	Yes (HTTP)	*	Yes (HTTP)	Yes (HTTP)	*	*	Yes (HTTP)	*	Yes (HTTP)	*	Yes (HTTPS)	Yes (HTTP)	*	*	*	*	Yes (HTTP)	Yes (HTTP)	*	*	*
					Protocol-Standard Data	Device Characteristics	Yes/No		Yes (HTTP)	*	Yes (HTTP)	Yes (HTTP)	Yes (HTTP)	Yes (HTTP)	Yes (HTTP, HTTPS)	Yes (HTTP)	Yes (HTTP)	Yes (HTTP)	Yes (HTTP)	*	Yes (HTTPS)	Yes (HTTPS)	Yes (HTTPS)	Yes (HTTP)	Yes (HTTP)	Yes (HTTP, HTTPS)	Yes (HTTP, HTTPS)	Yes (HTTPS)	Yes (HTTP)	Yes (HTTP)	Yes (HTTP)	Yes (HTTP)	Yes (HTTP)	Yes (HTTP)	Yes (HTTP)	Yes (HTTP)	Yes (HTTP)	*	Yes (HTTP, HTTPS)	Yes (HTTP)	*	*	Yes (HTTP)	Yes (HTTP)	Yes (HTTP)	Yes (HTTP)	*	*	*
					Protocol-Standard Data	IP Address	Yes/No		Yes (HTTP)	*	Yes (HTTP)	Yes (HTTP)	Yes (HTTP)	Yes (HTTP)	Yes (HTTP, HTTPS)	Yes (HTTP)	Yes (HTTP)	Yes (HTTP)	Yes (HTTP)	*	Yes (HTTPS)	Yes (HTTPS)	Yes (HTTPS)	Yes (HTTP)	Yes (HTTP)	Yes (HTTP, HTTPS)	Yes (HTTP, HTTPS)	Yes (HTTPS)	Yes (HTTP)	Yes (HTTP)	Yes (HTTP)	Yes (HTTP)	Yes (HTTP)	Yes (HTTP)	Yes (HTTP)	Yes (HTTP)	Yes (HTTP)	*	Yes (HTTP, HTTPS)	Yes (HTTP)	*	*	Yes (HTTP)	Yes (HTTP)	Yes (HTTP)	Yes (HTTP)	*	*	*
					Identifying Information (Strong)	Financial/Payment Details	Yes/No		*	*	*	*	*	*	*	*	*	*	*	*	*	*	*	*	*	*	*	*	*	*	*	*	*	*	*	*	*	*	*	*	*	*	*	*	*	*	*	*	*
						Summary of transmissions (COMBINES PRODUCT DUPLICATES)
						Identifying Information	Yes/No		No	No	*	Yes (HTTPS)	*	Yes (HTTPS)	*	No	*	Yes (HTTPS)	*	No	Yes (HTTPS)	Yes (HTTPS)	*	Yes (HTTPS)	*	Yes (HTTPS)	*	Yes (HTTPS)	Yes (HTTPS)	*	Yes (HTTPS)	Yes (HTTPS)	No	*	Yes (HTTPS)	*	Yes (HTTPS)	No	Yes (HTTPS)	*	No	*	No	*	Yes (HTTPS)	Yes (HTTPS)	*	*	*
						Identifying Information (Strong)	Yes/No		No	No	*	Yes (HTTPS)	*	No	*	No	*	Yes (HTTPS)	*	No	Yes (HTTPS)	No	*	Yes (HTTPS)	*	Yes (HTTPS)	*	Yes (HTTPS)	No	*	Yes (HTTPS)	No	No	*	Yes (HTTPS)	*	No	No	No	*	No	*	No	*	No	Yes (HTTPS)	*	*	*
						Identifying Information (Weaker)	Yes/No		No	No	*	Yes (HTTPS)	*	Yes (HTTPS)	*	No	*	Yes (HTTPS)	*	No	Yes (HTTPS)	Yes (HTTPS)	*	No	*	Yes (HTTPS)	*	Yes (HTTPS)	Yes (HTTPS)	*	Yes (HTTPS)	Yes (HTTPS)	No	*	Yes (HTTPS)	*	Yes (HTTPS)	No	Yes (HTTPS)	*	No	*	No	*	Yes (HTTPS)	Yes (HTTPS)	*	*	*
						Sensitive Information	Yes/No		No	No	*	No	*	No	*	No	*	Yes (HTTPS)	*	No	Yes (HTTPS)	No	*	No	*	No	*	No	No	*	No	No	No	*	No	*	No	No	Yes (HTTPS)	*	No	*	No	*	No	No	*	*	*
						Health Information	Yes/No		No	No	*	No	*	No	*	No	*	Yes (HTTPS)	*	No	No	No	*	No	*	No	*	No	No	*	No	No	No	*	No	*	No	No	Yes (HTTPS)	*	No	*	No	*	No	No	*	*	*
						Sensitive Information (Medical)	Yes/No		No	No	*	No	*	No	*	No	*	No	*	No	No	No	*	No	*	No	*	No	No	*	No	No	No	*	No	*	No	No	Yes (HTTPS)	*	No	*	No	*	No	No	*	*	*
						Sensitive Information (Measurements)	Yes/No		No	No	*	No	*	No	*	No	*	Yes (HTTPS)	*	No	No	No	*	No	*	No	*	No	No	*	No	No	No	*	No	*	No	No	No	*	No	*	No	*	No	No	*	*	*
						Sensitive Information (Other)	Yes/No		No	No	*	No	*	No	*	No	*	No	*	No	Yes (HTTPS)	No	*	No	*	No	*	No	No	*	No	No	No	*	No	*	No	No	Yes (HTTPS)	*	No	*	No	*	No	No	*	*	*
						Other Information	Yes/No		No	No	*	Yes (HTTPS)	*	No	*	No	*	Yes (HTTPS)	*	No	Yes (HTTPS)	No	*	No	*	No	*	No	No	*	No	No	No	*	No	*	No	No	Yes (HTTPS)	*	No	*	No	*	No	No	*	*	*
						Protocol-Standard Data	Yes/No		Yes (HTTPS)	Yes (HTTPS)	*	Yes (HTTPS)	*	Yes (HTTP)	*	Yes (HTTPS)	*	Yes (HTTPS)	*	No	Yes (HTTPS)	Yes (HTTPS)	*	Yes (HTTPS)	*	Yes (HTTP)	*	Yes (HTTPS)	Yes (HTTPS)	*	Yes (HTTPS)	Yes (HTTPS)	Yes (HTTPS)	*	Yes (HTTPS)	*	Yes (HTTPS)	No	Yes (HTTP)	*	No	*	Yes (HTTPS)	*	Yes (HTTPS)	Yes (HTTPS)	*	*	*
						Analytics Data	Yes/No		No	No	*	Yes (HTTPS)	*	Yes (HTTPS)	*	Yes (HTTPS)	*	Yes (HTTPS)	*	No	Yes (HTTPS)	Yes (HTTPS)	*	Yes (HTTPS)	*	Yes (HTTPS)	*	Yes (HTTPS)	Yes (HTTPS)	*	Yes (HTTPS)	Yes (HTTPS)	No	*	Yes (HTTPS)	*	No	No	Yes (HTTPS)	*	No	*	No	*	No	No	*	*	*
						ALL			(HTTPS)	(HTTPS)	*	(HTTPS)	*	(HTTP), (HTTPS)	*	(HTTPS)	*	(HTTPS)	*	*	(HTTPS)	(HTTPS)	*	(HTTPS)	*	(HTTP), (HTTPS)	*	(HTTPS)	(HTTPS)	*	(HTTPS)	(HTTPS)	(HTTPS)	*	(HTTPS)	*	(HTTPS)	*	(HTTP), (HTTPS)	*	*	*	(HTTPS)	*	(HTTPS)	(HTTPS)	*	*	*
						Identifying Information (Strong) OR Sensitive Information			No	No	*	(HTTPS)	*	No	*	No	*	(HTTPS)	*	No	(HTTPS)	No	*	(HTTPS)	*	(HTTPS)	*	(HTTPS)	No	*	(HTTPS)	No	No	*	(HTTPS)	*	No	No	(HTTPS)	*	No	*	No	*	No	(HTTPS)	*	*	*
						Identifying Information AND Sensitive Information			No	No	*	No	*	No	*	No	*	(HTTPS)	*	No	(HTTPS)	No	*	No	*	No	*	No	No	*	No	No	No	*	No	*	No	No	(HTTPS)	*	No	*	No	*	No	No	*	*	*
						Strong Identifiers Transmitted over HTTP	Comma Separated List		*	*	*	*	*	*	*	*	*	*	*	*	*	*	*	*	*	*	*	*	*	*	*	*	*	*	*	*	*	*	*	*	*	*	*	*	*	*	*	*	*
						Weaker Identifiers Transmitted over HTTP	Comma Separated List		*	*	*	*	*	*	*	*	*	*	*	*	*	*	*	*	*	*	*	*	*	*	*	*	*	*	*	*	*	*	*	*	*	*	*	*	*	*	*	*	*
						Sensitive Information Transmitted over HTTP	Comma Separated List		*	*	*	*	*	*	*	*	*	*	*	*	*	*	*	*	*	*	*	*	*	*	*	*	*	*	*	*	*	*	*	*	*	*	*	*	*	*	*	*	*
						Summary of collection (COMBINES PRODUCT DUPLICATES)
						Identifying Information	Yes/No		No	No	*	No	*	No	*	No	*	Yes	*	Yes	Yes	Yes	*	Yes	*	Yes	*	Yes	No	*	No	Yes	Yes	*	Yes	*	No	No	Yes	*	No	*	No	*	Yes	Yes	*	*	*
						Identifying Information (Strong)	Yes/No		No	No	*	No	*	No	*	No	*	Yes	*	Yes	Yes	No	*	Yes	*	Yes	*	Yes	No	*	No	Yes	No	*	Yes	*	No	No	Yes	*	No	*	No	*	No	Yes	*	*	*
						Identifying Information (Weaker)	Yes/No		No	No	*	No	*	No	*	No	*	Yes	*	No	Yes	Yes	*	No	*	No	*	No	No	*	No	No	Yes	*	Yes	*	No	No	Yes	*	No	*	No	*	Yes	Yes	*	*	*
						Sensitive Information	Yes/No		No	No	*	No	*	No	*	No	*	Yes	*	Yes	No	Yes	*	No	*	No	*	Yes	No	*	Yes	Yes	Yes	*	Yes	*	No	Yes	Yes	*	Yes	*	No	*	No	No	*	*	*
						Health Information	Yes/No		No	No	*	No	*	No	*	No	*	Yes	*	Yes	No	Yes	*	No	*	No	*	Yes	No	*	Yes	Yes	Yes	*	Yes	*	No	Yes	Yes	*	Yes	*	No	*	No	No	*	*	*
						Sensitive Information (Medical)	Yes/No		No	No	*	No	*	No	*	No	*	Yes	*	No	No	Yes	*	No	*	No	*	Yes	No	*	Yes	Yes	Yes	*	Yes	*	No	Yes	Yes	*	Yes	*	No	*	No	No	*	*	*
						Sensitive Information (Measurements)	Yes/No		No	No	*	No	*	No	*	No	*	Yes	*	Yes	No	No	*	No	*	No	*	No	No	*	No	Yes	Yes	*	Yes	*	No	Yes	No	*	No	*	No	*	No	No	*	*	*
						Sensitive Information (Other)	Yes/No		No	No	*	No	*	No	*	No	*	No	*	No	No	No	*	No	*	No	*	No	No	*	No	No	Yes	*	No	*	No	No	Yes	*	No	*	No	*	No	No	*	*	*
						Other Information	Yes/No		Yes	No	*	Yes	*	Yes	*	No	*	Yes	*	No	Yes	Yes	*	Yes	*	Yes	*	Yes	Yes	*	No	Yes	No	*	Yes	*	No	Yes	Yes	*	Yes	*	No	*	No	Yes	*	*	*
						Protocol-Standard Data	Yes/No		No	No	*	No	*	No	*	No	*	No	*	No	No	No	*	No	*	No	*	No	No	*	No	No	No	*	No	*	No	No	No	*	No	*	No	*	No	No	*	*	*
						Analytics Data	Yes/No		No	No	*	No	*	No	*	No	*	No	*	No	No	No	*	No	*	No	*	No	No	*	No	No	No	*	No	*	No	No	No	*	No	*	No	*	No	No	*	*	*
						ALL			Yes	No	*	Yes	*	Yes	*	No	*	Yes	*	Yes	Yes	Yes	*	Yes	*	Yes	*	Yes	Yes	*	Yes	Yes	Yes	*	Yes	*	No	Yes	Yes	*	Yes	*	No	*	Yes	Yes	*	*	*
						AppCollectsPID			No	No	*	No	*	No	*	No	*	Yes	*	Yes	Yes	Yes	*	Yes	*	Yes	*	Yes	No	*	Yes	Yes	Yes	*	Yes	*	No	Yes	Yes	*	Yes	*	No	*	No	Yes	*	*	*
						AppStoresData	Yes/No		Yes	Yes	*	Yes	*	Yes	*	Yes	*	Yes	*	Yes	Yes	Yes	*	Yes	*	Yes	*	Yes	Yes	*	Yes	Yes	No	*	Yes	*	Yes	Yes	Yes	*	Yes	*	Yes	*	Yes	No	*	*	*
						AppStoresPID	Yes/No		No	No	*	No	*	No	*	No	*	Yes	*	No	Yes	Yes	*	Yes	*	Yes	*	Yes	No	*	No	Yes	No	*	Yes	*	No	Yes	Yes	*	Yes	*	No	*	No	0	*	*	*
						AppCollectsOrStoresData	Yes/No		Yes	No	*	Yes	*	Yes	*	No	*	Yes	*	Yes	Yes	Yes	*	Yes	*	Yes	*	Yes	Yes	*	Yes	Yes	Yes	*	Yes	*	No	Yes	Yes	*	Yes	*	No	*	Yes	Yes	*	*	*
						AppCollectsOrStoresPID			No	No	*	No	*	No	*	No	*	Yes	*	Yes	Yes	Yes	*	Yes	*	Yes	*	Yes	No	*	Yes	Yes	Yes	*	Yes	*	No	Yes	Yes	*	Yes	*	No	*	No	Yes	*	*	*
						Summary of policy coverage (IGNORES PRODUCT DUPLICATES)
						Identifying Information	Yes/No		Will Transmit	Will Transmit	*	Will Transmit	*	NA	*	NA	*	Will Transmit	*	Will Transmit	Will Transmit	Will Transmit	*	Will Transmit	*	Will Transmit	*	NA	NA	*	Will Transmit	Will Transmit	NA	*	Will Transmit	*	NA	NA	Won't Transmit	*	NA	*	NA	*	Will Transmit	Will Transmit	*	*	*
						Identifying Information (Strong)	Yes/No		Will Transmit	Will Transmit	*	Will Transmit	*	NA	*	NA	*	Will Transmit	*	Will Transmit	Will Transmit	Will Transmit	*	Will Transmit	*	Will Transmit	*	NA	NA	*	Will Transmit	Will Transmit	NA	*	Will Transmit	*	NA	NA	Won't Transmit	*	NA	*	NA	*	Will Transmit	Will Transmit	*	*	*
						Identifying Information (Weaker)	Yes/No		Will Transmit	NA	*	Will Transmit	*	NA	*	NA	*	Will Transmit	*	NA	Will Transmit	NA	*	NA	*	NA	*	NA	NA	*	Will Transmit	Will Transmit	NA	*	Won't Transmit	*	NA	NA	NA	*	NA	*	NA	*	Will Transmit	Will Transmit	*	*	*
						Sensitive Information	Yes/No		NA	NA	*	NA	*	NA	*	NA	*	Will Transmit	*	NA	Will Transmit	NA	*	NA	*	NA	*	NA	NA	*	Will Transmit	Will Transmit	NA	*	NA	*	NA	NA	NA	*	NA	*	NA	*	NA	NA	*	*	*
						Health Information	Yes/No		NA	NA	*	NA	*	NA	*	NA	*	Will Transmit	*	NA	NA	NA	*	NA	*	NA	*	NA	NA	*	Will Transmit	Will Transmit	NA	*	NA	*	NA	NA	NA	*	NA	*	NA	*	NA	NA	*	*	*
						Sensitive Information (Medical)	Yes/No		NA	NA	*	NA	*	NA	*	NA	*	NA	*	NA	NA	NA	*	NA	*	NA	*	NA	NA	*	Will Transmit	Will Transmit	NA	*	NA	*	NA	NA	NA	*	NA	*	NA	*	NA	NA	*	*	*
						Sensitive Information (Measurements)	Yes/No		NA	NA	*	NA	*	NA	*	NA	*	Will Transmit	*	NA	NA	NA	*	NA	*	NA	*	NA	NA	*	NA	NA	NA	*	NA	*	NA	NA	NA	*	NA	*	NA	*	NA	NA	*	*	*
						Sensitive Information (Other)	Yes/No		NA	NA	*	NA	*	NA	*	NA	*	NA	*	NA	Will Transmit	NA	*	NA	*	NA	*	NA	NA	*	NA	NA	NA	*	NA	*	NA	NA	NA	*	NA	*	NA	*	NA	NA	*	*	*
						Other Information	Yes/No		NA	NA	*	NA	*	Will Transmit	*	NA	*	Will Transmit	*	Will Transmit	Will Transmit	Will Transmit	*	Will Transmit	*	Will Transmit	*	NA	NA	*	Will Transmit	Will Transmit	NA	*	Will Transmit	*	NA	NA	NA	*	NA	*	NA	*	Will Transmit	Will Transmit	*	*	*
						Protocol-Standard Data	Yes/No		NA	Will Transmit	*	Will Transmit	*	Will Transmit	*	NA	*	NA	*	Will Transmit	Will Transmit	Will Transmit	*	Will Transmit	*	Will Transmit	*	NA	NA	*	Will Transmit	Will Transmit	NA	*	Won't Transmit	*	NA	NA	NA	*	NA	*	NA	*	Will Transmit	Will Transmit	*	*	*
						Analytics Data	Yes/No		Will Transmit	Will Transmit	*	Will Transmit	*	Will Transmit	*	NA	*	NA	*	Will Transmit	Will Transmit	Will Transmit	*	Will Transmit	*	Will Transmit	*	NA	NA	*	NA	NA	NA	*	Will Transmit	*	NA	NA	NA	*	NA	*	NA	*	Will Transmit	Will Transmit	*	*	*
						Policy and collection mismatches (INCLUDES PRODUCT DUPLICATES)
					Identifying Information (Weaker)	Name (First or Unspecified)	Yes/No		P+C-	P*C-	P*C-	P+C-	P+C-	P*C-	P*C-	P*C*	P*C*	P+C+	P+C+	P*C-	P+C-	P*C-	P*C-	P*C-	P*C-	P*C-	P*C-	P*C*	P*C*	P*C*	P+C-	P+C-	P*C*	P*C*	P-C-	P-C-	P*C*	P*C*	P*C*	P*C*	P*C*	*	P*C*	P*C*	P+C-	P+C+	*	*	*
					Identifying Information (Strong)	Full Name	Yes/No		P*C-	P*C-	P*C-	P*C-	P*C-	P*C-	P*C-	P*C*	P*C*	P*C-	P*C-	P*C-	P*C+	P-C-	P-C-	P*C-	P*C-	P-C-	P-C-	P*C*	P*C*	P*C*	P*C-	P*C-	P*C*	P*C*	P-C-	P-C-	P*C*	P*C*	P-C-	P-C-	P*C*	*	P*C*	P*C*	P+C-	P*C+	*	*	*
					Identifying Information (Weaker)	Age or Year of Birth	Yes/No		P+C-	P*C-	P*C-	P*C-	P*C-	P*C-	P*C-	P*C*	P*C*	P*C+	P*C+	P*C-	P*C-	P*C+	P*C+	P*C-	P*C-	P*C-	P*C-	P*C*	P*C*	P*C*	P+C-	P+C-	P*C+	P*C+	P*C+	P*C+	P*C*	P*C*	P*C+	P*C+	P*C*	*	P*C*	P*C*	P*C-	P*C-	*	*	*
					Identifying Information (Strong)	Date of Birth	Yes/No		P+C-	P*C-	P*C-	P*C-	P*C-	P*C-	P*C-	P*C*	P*C*	P*C-	P*C-	P*C-	P*C+	P-C-	P-C-	P*C-	P*C-	P-C-	P-C-	P*C*	P*C*	P*C*	P*C-	P*C-	P*C*	P*C*	P-C-	P-C-	P*C*	P*C*	P-C-	P-C-	P*C*	*	P*C*	P*C*	P*C-	P*C+	*	*	*
					Identifying Information (Weaker)	Gender	Yes/No		P*C-	P*C-	P*C-	P*C-	P*C-	P*C-	P*C-	P*C*	P*C*	P*C+	P*C+	P*C-	P*C-	P*C+	P*C+	P*C-	P*C-	P*C-	P*C-	P*C*	P*C*	P*C*	P*C-	P*C-	P*C+	P*C+	P*C+	P*C+	P*C*	P*C*	P*C+	P*C+	P*C*	*	P*C*	P*C*	P*C-	P*C+	*	*	*
					Sensitive Information (Other)	Ethnicity	Yes/No		P*C-	P*C-	P*C-	P*C-	P*C-	P*C-	P*C-	P*C*	P*C*	P*C-	P*C-	P*C-	P*C-	P*C-	P*C-	P*C-	P*C-	P*C-	P*C-	P*C*	P*C*	P*C*	P*C-	P*C-	P*C+	P*C+	P*C-	P*C-	P*C*	P*C*	P*C*	P*C*	P*C*	*	P*C*	P*C*	P*C-	P*C-	*	*	*
					Sensitive Information (Other)	Sexuality	Yes/No		P*C-	P*C-	P*C-	P*C-	P*C-	P*C-	P*C-	P*C*	P*C*	P*C-	P*C-	P*C-	P*C-	P*C-	P*C-	P*C-	P*C-	P*C-	P*C-	P*C*	P*C*	P*C*	P*C-	P*C-	P*C*	P*C*	P*C-	P*C-	P*C*	P*C*	P*C+	P*C+	P*C*	*	P*C*	P*C*	P*C-	P*C-	*	*	*
					Sensitive Information (Other)	Political Affiliation	Yes/No		P*C-	P*C-	P*C-	P*C-	P*C-	P*C-	P*C-	P*C*	P*C*	P*C-	P*C-	P*C-	P*C-	P*C-	P*C-	P*C-	P*C-	P*C-	P*C-	P*C*	P*C*	P*C*	P*C-	P*C-	P*C*	P*C*	P*C-	P*C-	P*C*	P*C*	P*C*	P*C*	P*C*	*	P*C*	P*C*	P*C-	P*C-	*	*	*
					Sensitive Information (Other)	Religious Beliefs	Yes/No		P*C-	P*C-	P*C-	P*C-	P*C-	P*C-	P*C-	P*C*	P*C*	P*C-	P*C-	P*C-	P*C-	P*C-	P*C-	P*C-	P*C-	P*C-	P*C-	P*C*	P*C*	P*C*	P*C-	P*C-	P*C*	P*C*	P*C-	P*C-	P*C*	P*C*	P*C*	P*C*	P*C*	*	P*C*	P*C*	P*C-	P*C-	*	*	*
					Sensitive Information (Other)	Employment Status	Yes/No		P*C-	P*C-	P*C-	P*C-	P*C-	P*C-	P*C-	P*C*	P*C*	P*C-	P*C-	P*C-	P+C-	P*C-	P*C-	P*C-	P*C-	P*C-	P*C-	P*C*	P*C*	P*C*	P*C-	P*C-	P*C*	P*C*	P*C-	P*C-	P*C*	P*C*	P*C+	P*C+	P*C*	*	P*C*	P*C*	P*C-	P*C-	*	*	*
					Sensitive Information (Medical)	Disability Status	Yes/No		P*C-	P*C-	P*C-	P*C-	P*C-	P*C-	P*C-	P*C*	P*C*	P*C-	P*C-	P*C-	P*C-	P*C-	P*C-	P*C-	P*C-	P*C-	P*C-	P*C*	P*C*	P*C*	P*C-	P*C-	P*C*	P*C*	P*C-	P*C-	P*C*	P*C*	P*C*	P*C*	P*C*	*	P*C*	P*C*	P*C-	P*C-	*	*	*
					Identifying Information (Strong)	Postal Address	Yes/No		P*C-	P*C-	P*C-	P+C-	P+C-	P*C-	P*C-	P*C*	P*C*	P+C-	P+C-	P*C-	P+C+	P-C-	P-C-	P*C-	P*C-	P-C-	P-C-	P*C*	P*C*	P*C*	P-C-	P-C-	P*C*	P*C*	P-C-	P-C-	P*C*	P*C*	P-C+	P-C+	P*C*	*	P*C*	P*C*	P+C-	P*C-	*	*	*
					Identifying Information (Strong)	Full Postcode	Yes/No		P+C-	P*C-	P*C-	P+C-	P+C-	P*C-	P*C-	P*C*	P*C*	P+C-	P+C-	P*C-	P+C+	P-C-	P-C-	P*C-	P*C-	P-C-	P-C-	P*C*	P*C*	P*C*	P-C-	P-C-	P*C*	P*C*	P-C-	P-C-	P*C*	P*C*	P-C+	P-C+	P*C*	*	P*C*	P*C*	P+C-	P*C-	*	*	*
					Identifying Information (Weaker)	Country or Area or Partial Postcode	Yes/No		P+C-	P*C-	P*C-	P*C-	P*C-	P*C-	P*C-	P*C*	P*C*	P*C-	P*C-	P*C-	P*C+	P*C-	P*C-	P*C-	P*C-	P*C-	P*C-	P*C*	P*C*	P*C*	P*C-	P*C-	P*C*	P*C*	P*C-	P*C-	P*C*	P*C*	P*C+	P*C+	P*C*	*	P*C*	P*C*	P*C*	P*C+	*	*	*
					Identifying Information (Weaker)	Geolocation	Yes/No		P*C-	P*C-	P*C-	P*C-	P*C-	P*C-	P*C-	P*C*	P*C*	P+C-	P+C-	P*C-	P+C-	P*C-	P*C-	P*C-	P*C-	P*C-	P*C-	P*C*	P*C*	P*C*	P*C-	P*C-	P*C*	P*C*	P-C-	P-C-	P*C*	P*C*	P*C*	P*C*	P*C*	*	P*C*	P*C*	P+C+	P*C-	*	*	*
					Identifying Information (Strong)	Email Address	Yes/No		P+C-	P+C-	P+C-	P+C-	P+C-	P*C-	P*C-	P*C*	P*C*	P+C+	P+C+	P+C-	P+C+	P-C-	P-C-	P+C+	P+C+	P-C+	P-C+	P*C*	P*C*	P*C*	P+C-	P+C-	P*C*	P*C*	P-C+	P-C+	P*C*	P*C*	P-C-	P-C-	P*C*	*	P*C*	P*C*	P+C-	P+C-	*	*	*
					Identifying Information (Strong)	Telephone Numbers	Yes/No		P+C-	P*C-	P*C-	P+C-	P+C-	P*C-	P*C-	P*C*	P*C*	P+C-	P+C-	P*C-	P+C+	P-C-	P-C-	P*C-	P*C-	P-C-	P-C-	P*C*	P*C*	P*C*	P*C-	P*C-	P*C*	P*C*	P-C-	P-C-	P*C*	P*C*	P-C-	P-C-	P*C*	*	P*C*	P*C*	P+C-	P*C-	*	*	*
					Identifying Information (Strong)	Username	Yes/No		P*C-	P+C-	P+C-	P*C-	P*C-	P*C-	P*C-	P*C*	P*C*	P+C-	P+C-	P*C-	P*C+	P-C-	P-C-	P*C-	P*C-	P-C-	P-C-	P*C*	P*C*	P*C*	P+C-	P+C-	P*C*	P*C*	P-C-	P-C-	P*C*	P*C*	P-C-	P-C-	P*C*	*	P*C*	P*C*	P*C-	P*C+	*	*	*
					Identifying Information (Strong)	Password	Yes/No		P*C-	P+C-	P+C-	P*C-	P*C-	P*C-	P*C-	P*C*	P*C*	P+C+	P+C+	P*C-	P+C+	P-C-	P-C-	P*C-	P*C-	P-C-	P-C-	P*C*	P*C*	P*C*	P*C-	P*C+	P*C*	P*C*	P+C-	P+C-	P*C*	P*C*	P-C-	P-C-	P*C*	*	P*C*	P*C*	P*C-	P+C+	*	*	*
					Identifying Information (Strong)	Medical System Numbers	Yes/No		P*C-	P*C-	P*C-	P*C-	P*C-	P*C-	P*C-	P*C*	P*C*	P*C-	P*C-	P*C-	P*C-	P-C-	P-C-	P*C-	P*C-	P-C-	P-C-	P*C+	P*C*	P*C*	P*C-	P*C-	P*C*	P*C*	P-C-	P-C-	P*C*	P*C*	P-C-	P-C-	P*C*	*	P*C*	P*C*	P*C-	P*C-	*	*	*
					Identifying Information (Strong)	Social Security Number	Yes/No		P*C-	P*C-	P*C-	P*C-	P*C-	P*C-	P*C-	P*C*	P*C*	P*C-	P*C-	P*C-	P*C-	P-C-	P-C-	P*C-	P*C-	P-C-	P-C-	P*C*	P*C*	P*C*	P*C-	P*C-	P*C*	P*C*	P-C-	P-C-	P*C*	P*C*	P-C-	P-C-	P*C*	*	P*C*	P*C*	P+C-	P*C-	*	*	*
					Other Information	Hobbies and Interests	Yes/No		P*C-	P*C-	P*C-	P*C-	P*C-	P*C-	P*C-	P*C*	P*C*	P*C-	P*C-	P*C-	P+C+	P+C-	P+C-	P+C-	P+C-	P+C-	P+C-	P*C*	P*C*	P*C*	P*C-	P*C-	P*C*	P*C*	P*C-	P*C-	P*C*	P*C*	P*C*	P*C*	P*C*	*	P*C*	P*C*	P*C-	P*C-	*	*	*
					Sensitive Information (Measurements)	Measured Health Parameters	Yes/No		P*C-	P*C-	P*C-	P*C-	P*C-	P*C-	P*C-	P*C*	P*C*	P+C+	P+C+	P*C+	P*C-	P*C-	P*C-	P*C-	P*C-	P*C-	P*C-	P*C*	P*C*	P*C*	P*C-	P*C+	P*C+	P*C+	P*C+	P*C+	P*C*	P*C+	P*C*	P*C*	P*C*	*	P*C*	P*C*	P*C-	P*C-	*	*	*
					Sensitive Information (Medical)	Medical History	Yes/No		P*C-	P*C-	P*C-	P*C-	P*C-	P*C-	P*C-	P*C*	P*C*	P*C+	P*C+	P*C-	P*C-	P*C-	P*C-	P*C-	P*C-	P*C-	P*C-	P*C+	P*C*	P*C*	P+C-	P+C+	P*C+	P*C+	P*C+	P*C+	P*C*	P*C*	P*C+	P*C+	P*C+	*	P*C*	P*C*	P*C-	P*C-	*	*	*
					Sensitive Information (Medical)	HIV Status	Yes/No		P*C-	P*C-	P*C-	P*C-	P*C-	P*C-	P*C-	P*C*	P*C*	P*C-	P*C-	P*C-	P*C-	P*C-	P*C-	P*C-	P*C-	P*C-	P*C-	P*C*	P*C*	P*C*	P*C-	P*C-	P*C*	P*C*	P*C-	P*C-	P*C*	P*C*	P*C*	P*C*	P*C*	*	P*C*	P*C*	P*C-	P*C-	*	*	*
					Sensitive Information (Medical)	Mental Health Status	Yes/No		P*C-	P*C-	P*C-	P*C-	P*C-	P*C-	P*C-	P*C*	P*C*	P*C+	P*C+	P*C-	P*C-	P*C-	P*C-	P*C-	P*C-	P*C-	P*C-	P*C*	P*C*	P*C*	P*C+	P*C-	P*C*	P*C*	P*C-	P*C-	P*C*	P*C*	P*C+	P*C+	P*C*	*	P*C*	P*C*	P*C-	P*C-	*	*	*
					Sensitive Information (Medical)	Medications	Yes/No		P*C-	P*C-	P*C-	P*C-	P*C-	P*C-	P*C-	P*C*	P*C*	P*C-	P*C-	P*C-	P*C-	P*C-	P*C-	P*C-	P*C-	P*C-	P*C-	P*C*	P*C*	P*C*	P*C-	P*C+	P*C+	P*C+	P*C-	P*C-	P*C*	P*C*	P*C+	P*C+	P*C+	*	P*C*	P*C*	P*C-	P*C-	*	*	*
					Sensitive Information (Medical)	Substance Use	Yes/No		P*C-	P*C-	P*C-	P*C-	P*C-	P*C-	P*C-	P*C*	P*C*	P*C-	P*C-	P*C-	P*C-	P*C+	P*C+	P*C-	P*C-	P*C-	P*C-	P*C*	P*C*	P*C*	P*C-	P*C-	P*C+	P*C+	P*C+	P*C+	P*C*	P*C+	P*C+	P*C+	P*C*	*	P*C*	P*C*	P*C-	P*C-	*	*	*
					Sensitive Information (Medical)	Genetic Information	Yes/No		P*C-	P*C-	P*C-	P*C-	P*C-	P*C-	P*C-	P*C*	P*C*	P*C-	P*C-	P*C-	P*C-	P*C-	P*C-	P*C-	P*C-	P*C-	P*C-	P*C*	P*C*	P*C*	P*C-	P*C-	P*C*	P*C*	P*C-	P*C-	P*C*	P*C*	P*C*	P*C*	P*C*	*	P*C*	P*C*	P*C-	P*C-	*	*	*
					Sensitive Information (Medical)	IVF Information	Yes/No		P*C-	P*C-	P*C-	P*C-	P*C-	P*C-	P*C-	P*C*	P*C*	P*C-	P*C-	P*C-	P*C-	P*C-	P*C-	P*C-	P*C-	P*C-	P*C-	P*C*	P*C*	P*C*	P*C-	P*C-	P*C*	P*C*	P*C-	P*C-	P*C*	P*C*	P*C*	P*C*	P*C*	*	P*C*	P*C*	P*C-	P*C-	*	*	*
					Identifying Information (Strong)	Photographs of People	Yes/No		P*C-	P*C-	P*C-	P*C-	P*C-	P*C-	P*C-	P*C*	P*C*	P*C-	P*C-	P*C-	P+C+	P-C-	P-C-	P*C-	P*C-	P-C-	P-C-	P*C*	P*C*	P*C*	P*C-	P*C-	P*C*	P*C*	P-C-	P-C-	P*C*	P*C*	P-C-	P-C-	P*C*	*	P*C*	P*C*	P*C-	P+C+	*	*	*
					Other Information	Other Photographs	Yes/No		P*C-	P*C-	P*C-	P*C-	P*C-	P*C-	P*C-	P*C*	P*C*	P*C+	P*C+	P*C-	P*C-	P*C-	P*C-	P*C-	P*C-	P*C-	P*C-	P*C*	P*C*	P*C*	P+C-	P+C-	P*C*	P*C*	P*C+	P*C+	P*C*	P*C*	P*C*	P*C*	P*C+	*	P*C*	P*C*	P*C-	P*C+	*	*	*
					Identifying Information (Strong)	Social Network Credentials	Yes/No		P*C-	P*C-	P*C-	P*C-	P*C-	P*C-	P*C-	P*C*	P*C*	P*C-	P*C-	P*C-	P*C-	P+C-	P+C-	P+C-	P+C-	P+C-	P*C-	P*C*	P*C*	P*C*	P*C-	P*C-	P*C*	P*C*	P-C+	P-C+	P*C*	P*C*	P-C-	P-C-	P*C*	*	P*C*	P*C*	P*C-	P*C-	*	*	*
					Identifying Information (Strong)	Others' Contact Details	Yes/No		P*C-	P*C-	P*C-	P*C-	P*C-	P*C-	P*C-	P*C*	P*C*	P*C-	P*C-	P*C+	P*C-	P-C-	P-C-	P*C-	P*C-	P-C-	P-C-	P*C*	P*C*	P*C*	P*C-	P*C-	P*C*	P*C*	P-C-	P-C-	P*C*	P*C*	P-C-	P-C-	P*C*	*	P*C*	P*C*	P*C-	P*C+	*	*	*
					Identifying Information (Strong)	Others Email Addresses	Yes/No		P*C-	P*C-	P*C-	P*C-	P*C-	P*C-	P*C-	P*C*	P*C*	P*C-	P*C-	P*C-	P*C-	P-C-	P-C-	P*C-	P*C-	P-C-	P-C-	P*C*	P*C*	P*C*	P*C-	P*C-	P*C*	P*C*	P-C-	P-C-	P*C*	P*C*	P-C-	P-C-	P*C*	*	P*C*	P*C*	P*C-	P*C+	*	*	*
					Other Information	User Generated Content Not Previously Covered	Yes/No		P*C+	P*C-	P*C-	P*C+	P*C+	P+C+	P+C+	P*C*	P*C*	P+C+	P+C+	P+C-	P+C+	P+C+	P+C+	P+C+	P+C+	P+C+	P+C+	P*C+	P*C+	P*C*	P+C-	P+C+	P*C*	P*C*	P+C+	P+C+	P*C*	P*C+	P*C+	P*C+	P*C+	*	P*C*	P*C*	P+C-	P+C+	*	*	*
					Identifying Information (Strong)	Financial/Payment Details	Yes/No		P+C-	P+C-	P+C-	P+C-	P+C-	P+C-	P+C-	P*C*	P*C*	P*C+	P*C+	P+C-	P+C-	P+C-	P+C-	P+C-	P+C-	P+C-	P+C-	P*C*	P*C*	P*C*	P*C-	P*C-	P*C*	P*C*	P+C-	P+C-	P*C*	P*C*	P*C*	P*C*	P*C*	*	P*C*	P*C*	P+C-	P+C-	*	*	*
						Summary of policy and collection mismatches (COMBINES PRODUCT DUPLICATES)
						Identifying Information			P*C-, P+C-	P*C-, P+C-	*	P*C-, P+C-	*	P*C-, P+C-	*	P*C*	*	P*C-, P*C+, P+C-, P+C+	*	P*C-, P*C+, P+C-	P*C-, P*C+, P+C-, P+C+	P*C-, P*C+, P+C-, P-C-	*	P*C-, P+C-, P+C+	*	P*C-, P+C-, P-C-, P-C+	*	P*C*, P*C+	P*C*	*	P*C-, P+C-, P-C-	P*C-, P*C+, P+C-, P-C-	P*C*, P*C+	*	P*C-, P*C+, P+C-, P-C-, P-C+	*	P*C*	P*C*	P*C*, P*C+, P-C-, P-C+	*	P*C*	*	P*C*	*	P*C-, P*C*, P+C-, P+C+	P*C-, P*C+, P+C-, P+C+	*	*	*
						Identifying Information (Strong)			P*C-, P+C-	P*C-, P+C-	*	P*C-, P+C-	*	P*C-, P+C-	*	P*C*	*	P*C-, P*C+, P+C-, P+C+	*	P*C-, P*C+, P+C-	P*C-, P*C+, P+C-, P+C+	P+C-, P-C-	*	P*C-, P+C-, P+C+	*	P*C-, P+C-, P-C-, P-C+	*	P*C*, P*C+	P*C*	*	P*C-, P+C-, P-C-	P*C-, P*C+, P+C-, P-C-	P*C*	*	P+C-, P-C-, P-C+	*	P*C*	P*C*	P*C*, P-C-, P-C+	*	P*C*	*	P*C*	*	P*C-, P+C-	P*C-, P*C+, P+C-, P+C+	*	*	*
						Identifying Information (Weaker)			P*C-, P+C-	P*C-	*	P*C-, P+C-	*	P*C-	*	P*C*	*	P*C-, P*C+, P+C-, P+C+	*	P*C-	P*C-, P*C+, P+C-	P*C-, P*C+	*	P*C-	*	P*C-	*	P*C*	P*C*	*	P*C-, P+C-	P*C-, P+C-	P*C*, P*C+	*	P*C-, P*C+, P-C-	*	P*C*	P*C*	P*C*, P*C+	*	P*C*	*	P*C*	*	P*C-, P*C*, P+C-, P+C+	P*C-, P*C+, P+C+	*	*	*
						Sensitive Information			P*C-	P*C-	*	P*C-	*	P*C-	*	P*C*	*	P*C-, P*C+, P+C+	*	P*C-, P*C+	P*C-, P+C-	P*C-, P*C+	*	P*C-	*	P*C-	*	P*C*, P*C+	P*C*	*	P*C-, P*C+, P+C-	P*C-, P*C+, P+C+	P*C*, P*C+	*	P*C-, P*C+	*	P*C*	P*C*, P*C+	P*C*, P*C+	*	P*C*, P*C+	*	P*C*	*	P*C-	P*C-	*	*	*
						Sensitive Information (Medical)			P*C-	P*C-	*	P*C-	*	P*C-	*	P*C*	*	P*C-, P*C+	*	P*C-	P*C-	P*C-, P*C+	*	P*C-	*	P*C-	*	P*C*, P*C+	P*C*	*	P*C-, P*C+, P+C-	P*C-, P*C+, P+C+	P*C*, P*C+	*	P*C-, P*C+	*	P*C*	P*C*, P*C+	P*C*, P*C+	*	P*C*, P*C+	*	P*C*	*	P*C-	P*C-	*	*	*
						Sensitive Information (Measurements)			P*C-	P*C-	*	P*C-	*	P*C-	*	P*C*	*	P+C+	*	P*C+	P*C-	P*C-	*	P*C-	*	P*C-	*	P*C*	P*C*	*	P*C-	P*C+	P*C+	*	P*C+	*	P*C*	P*C+	P*C*	*	P*C*	*	P*C*	*	P*C-	P*C-	*	*	*
						Sensitive Information (Other)			P*C-	P*C-	*	P*C-	*	P*C-	*	P*C*	*	P*C-	*	P*C-	P*C-, P+C-	P*C-	*	P*C-	*	P*C-	*	P*C*	P*C*	*	P*C-	P*C-	P*C*, P*C+	*	P*C-	*	P*C*	P*C*	P*C*, P*C+	*	P*C*	*	P*C*	*	P*C-	P*C-	*	*	*
						Other Information			P*C-, P*C+	P*C-	*	P*C-, P*C+	*	P*C-, P+C+	*	P*C*	*	P*C-, P*C+, P+C+	*	P*C-, P+C-	P*C-, P+C+	P*C-, P+C-, P+C+	*	P*C-, P+C-, P+C+	*	P*C-, P+C-, P+C+	*	P*C*, P*C+	P*C*, P*C+	*	P*C-, P+C-	P*C-, P+C-, P+C+	P*C*	*	P*C-, P*C+, P+C+	*	P*C*	P*C*, P*C+	P*C*, P*C+	*	P*C*, P*C+	*	P*C*	*	P*C-, P+C-	P*C-, P*C+, P+C+	*	*	*
						ALL			P*C-, P*C+, P+C-	P*C-, P+C-	0	P*C-, P*C+, P+C-	0	P*C-, P+C-, P+C+	0	P*C*	0	P*C-, P*C+, P+C-, P+C+	0	P*C-, P*C+, P+C-	P*C-, P*C+, P+C-, P+C+	P*C-, P*C+, P+C-, P+C+, P-C-	0	P*C-, P+C-, P+C+	0	P*C-, P+C-, P+C+, P-C-, P-C+	0	P*C*, P*C+	P*C*, P*C+	0	P*C-, P*C+, P+C-, P-C-	P*C-, P*C+, P+C-, P+C+, P-C-	P*C*, P*C+	0	P*C-, P*C+, P+C-, P+C+, P-C-, P-C+	0	P*C*	P*C*, P*C+	P*C*, P*C+, P-C-, P-C+	0	P*C*, P*C+	0	P*C*	0	P*C-, P*C*, P+C-, P+C+	P*C-, P*C+, P+C-, P+C+	0	0	0
						Doesn't Contradict Policy			No	Yes	*	No	*	Yes	*	Yes	*	No	*	No	No	No	*	Yes	*	No	*	No	No	*	No	No	No	*	No	*	Yes	No	No	*	No	*	Yes	*	Yes	No	*	*	*
						Policy and transmission mismatches (INCLUDES PRODUCT DUPLICATES)
					Identifying Information (Weaker)	Name (First or Unspecified)	Yes/No		P+T-	P*T-	P*T-	P+T-	P+T-	P*T-	P*T-	P*T*	P*T*	P+T+	P+T+	P*T-	P+T-	P*T-	P*T-	P*T-	P*T-	P*T-	P*T-	P*T*	P*T*	P*T*	P+T-	P+T-	P*T*	P*T*	P*T*	P*T*	P*T*	P*T*	P*T*	P*T*	P*T*	*	P*T*	P*T*	P+T-	P+T-	*	*	*
					Identifying Information (Strong)	Full Name	Yes/No		P*T-	P*T-	P*T-	P*T-	P*T-	P*T-	P*T-	P*T*	P*T*	P*T-	P*T-	P*T-	P*T+	P*T*	P*T*	P*T-	P*T-	P*T*	P*T*	P*T*	P*T*	P*T*	P*T-	P*T-	P*T*	P*T*	P*T*	P*T*	P*T*	P*T*	P*T*	P*T*	P*T*	*	P*T*	P*T*	P+T-	P*T+	*	*	*
					Identifying Information (Weaker)	Age or Year of Birth	Yes/No		P+T-	P*T-	P*T-	P*T-	P*T-	P*T-	P*T-	P*T*	P*T*	P*T+	P*T+	P*T-	P*T-	P*T+	P*T+	P*T-	P*T-	P*T-	P*T-	P*T*	P*T*	P*T*	P+T-	P+T-	P*T*	P*T*	P*T-	P*T-	P*T*	P*T*	P*T+	P*T+	P*T*	*	P*T*	P*T*	P*T-	P*T-	*	*	*
					Identifying Information (Strong)	Date of Birth	Yes/No		P+T-	P*T-	P*T-	P*T-	P*T-	P*T-	P*T-	P*T*	P*T*	P*T-	P*T-	P*T-	P*T-	P*T*	P*T*	P*T-	P*T-	P*T*	P*T*	P*T*	P*T*	P*T*	P*T-	P*T-	P*T*	P*T*	P*T*	P*T*	P*T*	P*T*	P*T*	P*T*	P*T*	*	P*T*	P*T*	P*T-	P*T+	*	*	*
					Identifying Information (Weaker)	Gender	Yes/No		P*T-	P*T-	P*T-	P*T-	P*T-	P*T-	P*T-	P*T*	P*T*	P*T+	P*T+	P*T-	P*T-	P*T+	P*T+	P*T-	P*T-	P*T-	P*T-	P*T*	P*T*	P*T*	P*T-	P*T-	P*T*	P*T*	P*T-	P*T-	P*T*	P*T*	P*T+	P*T+	P*T*	*	P*T*	P*T*	P*T-	P*T+	*	*	*
					Sensitive Information (Other)	Ethnicity	Yes/No		P*T-	P*T-	P*T-	P*T-	P*T-	P*T-	P*T-	P*T*	P*T*	P*T-	P*T-	P*T-	P*T-	P*T-	P*T-	P*T-	P*T-	P*T-	P*T-	P*T*	P*T*	P*T*	P*T-	P*T-	P*T*	P*T*	P*T-	P*T-	P*T*	P*T*	P*T*	P*T*	P*T*	*	P*T*	P*T*	P*T-	P*T-	*	*	*
					Sensitive Information (Other)	Sexuality	Yes/No		P*T-	P*T-	P*T-	P*T-	P*T-	P*T-	P*T-	P*T*	P*T*	P*T-	P*T-	P*T-	P*T-	P*T-	P*T-	P*T-	P*T-	P*T-	P*T-	P*T*	P*T*	P*T*	P*T-	P*T-	P*T*	P*T*	P*T-	P*T-	P*T*	P*T*	P*T+	P*T+	P*T*	*	P*T*	P*T*	P*T-	P*T-	*	*	*
					Sensitive Information (Other)	Political Affiliation	Yes/No		P*T-	P*T-	P*T-	P*T-	P*T-	P*T-	P*T-	P*T*	P*T*	P*T-	P*T-	P*T-	P*T-	P*T-	P*T-	P*T-	P*T-	P*T-	P*T-	P*T*	P*T*	P*T*	P*T-	P*T-	P*T*	P*T*	P*T-	P*T-	P*T*	P*T*	P*T*	P*T*	P*T*	*	P*T*	P*T*	P*T-	P*T-	*	*	*
					Sensitive Information (Other)	Religious Beliefs	Yes/No		P*T-	P*T-	P*T-	P*T-	P*T-	P*T-	P*T-	P*T*	P*T*	P*T-	P*T-	P*T-	P*T-	P*T-	P*T-	P*T-	P*T-	P*T-	P*T-	P*T*	P*T*	P*T*	P*T-	P*T-	P*T*	P*T*	P*T-	P*T-	P*T*	P*T*	P*T*	P*T*	P*T*	*	P*T*	P*T*	P*T-	P*T-	*	*	*
					Sensitive Information (Other)	Employment Status	Yes/No		P*T-	P*T-	P*T-	P*T-	P*T-	P*T-	P*T-	P*T*	P*T*	P*T-	P*T-	P*T-	P+T+	P*T-	P*T-	P*T-	P*T-	P*T-	P*T-	P*T*	P*T*	P*T*	P*T-	P*T-	P*T*	P*T*	P*T-	P*T-	P*T*	P*T*	P*T+	P*T+	P*T*	*	P*T*	P*T*	P*T-	P*T-	*	*	*
					Sensitive Information (Medical)	Disability Status	Yes/No		P*T-	P*T-	P*T-	P*T-	P*T-	P*T-	P*T-	P*T*	P*T*	P*T-	P*T-	P*T-	P*T-	P*T-	P*T-	P*T-	P*T-	P*T-	P*T-	P*T*	P*T*	P*T*	P*T-	P*T-	P*T*	P*T*	P*T-	P*T-	P*T*	P*T*	P*T*	P*T*	P*T*	*	P*T*	P*T*	P*T-	P*T-	*	*	*
					Identifying Information (Strong)	Postal Address	Yes/No		P*T-	P*T-	P*T-	P+T-	P+T-	P*T-	P*T-	P*T*	P*T*	P+T-	P+T-	P*T-	P+T-	P*T*	P*T*	P*T-	P*T-	P*T*	P*T*	P*T*	P*T*	P*T*	P*T*	P*T*	P*T*	P*T*	P*T*	P*T*	P*T*	P*T*	P*T*	P*T*	P*T*	*	P*T*	P*T*	P+T-	P*T-	*	*	*
					Identifying Information (Strong)	Postcode	Yes/No		P+T-	P*T-	P*T-	P+T-	P+T-	P*T-	P*T-	P*T*	P*T*	P+T-	P+T-	P*T-	P+T+	P*T*	P*T*	P*T-	P*T-	P*T*	P*T*	P*T*	P*T*	P*T*	P*T*	P*T*	P*T*	P*T*	P*T*	P*T*	P*T*	P*T*	P*T*	P*T*	P*T*	*	P*T*	P*T*	P+T-	P*T+	*	*	*
					Device Characteristics	Country/Area/Locale	Yes/No		P+T-	P*T-	P*T-	P*T-	P*T+	P*T-	P*T-	P*T*	P*T*	P*T+	P*T+	P*T-	P*T-	P*T-	P*T-	P*T-	P*T-	P*T-	P*T-	P*T+	P*T*	P*T*	P*T+	P*T+	P*T*	P*T*	P*T+	P*T+	P*T*	P*T*	P*T+	P*T+	P*T*	*	P*T*	P*T*	P*T*	P*T+	*	*	*
					Identifying Information (Weaker)	Geolocation	Yes/No		P*T-	P*T-	P*T-	P*T-	P*T-	P*T-	P*T-	P*T*	P*T*	P+T-	P+T-	P*T-	P+T+	P*T-	P*T-	P*T-	P*T-	P*T-	P*T-	P*T*	P*T+	P*T*	P*T-	P*T-	P*T*	P*T*	P*T*	P*T*	P*T*	P*T*	P*T*	P*T*	P*T*	*	P*T*	P*T*	P+T+	P*T-	*	*	*
					Identifying Information (Strong)	Email Address	Yes/No		P+T-	P+T-	P+T-	P+T-	P+T-	P*T-	P*T-	P*T*	P*T*	P+T+	P+T+	P+T-	P+T+	P*T*	P*T*	P+T+	P+T-	P*T+	P*T+	P*T*	P*T*	P*T*	P+T-	P+T-	P*T*	P*T*	P*T*	P*T*	P*T*	P*T*	P*T*	P*T*	P*T*	*	P*T*	P*T*	P+T-	P+T+	*	*	*
					Identifying Information (Strong)	Telephone Numbers	Yes/No		P+T-	P*T-	P*T-	P+T-	P+T-	P*T-	P*T-	P*T*	P*T*	P+T-	P+T-	P*T-	P+T-	P*T*	P*T*	P*T-	P*T-	P*T*	P*T*	P*T*	P*T*	P*T*	P*T-	P*T-	P*T*	P*T*	P*T*	P*T*	P*T*	P*T*	P*T*	P*T*	P*T*	*	P*T*	P*T*	P+T-	P*T-	*	*	*
					Identifying Information (Strong)	Username	Yes/No		P*T-	P+T-	P+T-	P*T-	P*T-	P*T-	P*T-	P*T*	P*T*	P+T+	P+T-	P*T-	P*T+	P*T*	P*T*	P*T-	P*T-	P*T*	P*T*	P*T*	P*T*	P*T*	P+T-	P+T-	P*T*	P*T*	P*T*	P*T*	P*T*	P*T*	P*T*	P*T*	P*T*	*	P*T*	P*T*	P*T-	P*T+	*	*	*
					Identifying Information (Strong)	Password	Yes/No		P*T-	P+T-	P+T-	P*T-	P*T-	P*T-	P*T-	P*T*	P*T*	P+T+	P+T+	P*T-	P+T+	P*T*	P*T*	P*T-	P*T-	P*T*	P*T*	P*T*	P*T*	P*T*	P*T-	P*T-	P*T*	P*T*	P+T-	P+T-	P*T*	P*T*	P*T*	P*T*	P*T*	*	P*T*	P*T*	P*T-	P+T+	*	*	*
					Identifying Information (Strong)	Medical System Numbers	Yes/No		P*T-	P*T-	P*T-	P*T-	P*T-	P*T-	P*T-	P*T*	P*T*	P*T-	P*T-	P*T-	P*T-	P*T*	P*T*	P*T-	P*T-	P*T*	P*T*	P*T*	P*T*	P*T*	P*T-	P*T-	P*T*	P*T*	P*T*	P*T*	P*T*	P*T*	P*T*	P*T*	P*T*	*	P*T*	P*T*	P*T-	P*T-	*	*	*
					Identifying Information (Strong)	Social Security Number	Yes/No		P*T-	P*T-	P*T-	P*T-	P*T-	P*T-	P*T-	P*T*	P*T*	P*T-	P*T-	P*T-	P*T-	P*T*	P*T*	P*T-	P*T-	P*T*	P*T*	P*T*	P*T*	P*T*	P*T-	P*T-	P*T*	P*T*	P*T*	P*T*	P*T*	P*T*	P*T*	P*T*	P*T*	*	P*T*	P*T*	P+T-	P*T-	*	*	*
					Other Information	Hobbies and Interests	Yes/No		P*T-	P*T-	P*T-	P*T-	P*T-	P*T-	P*T-	P*T*	P*T*	P*T-	P*T-	P*T-	P+T+	P+T-	P+T-	P+T-	P+T-	P+T-	P+T-	P*T*	P*T*	P*T*	P*T-	P*T-	P*T*	P*T*	P*T-	P*T-	P*T*	P*T*	P*T*	P*T*	P*T*	*	P*T*	P*T*	P*T-	P*T-	*	*	*
					Sensitive Information (Measurements)	Measured Health Parameters	Yes/No		P*T-	P*T-	P*T-	P*T-	P*T-	P*T-	P*T-	P*T*	P*T*	P+T+	P+T+	P*T-	P*T-	P*T-	P*T-	P*T-	P*T-	P*T-	P*T-	P*T*	P*T*	P*T*	P*T-	P*T-	P*T*	P*T*	P*T-	P*T-	P*T*	P*T*	P*T*	P*T*	P*T*	*	P*T*	P*T*	P*T-	P*T-	*	*	*
					Sensitive Information (Medical)	Medical History	Yes/No		P*T-	P*T-	P*T-	P*T-	P*T-	P*T-	P*T-	P*T*	P*T*	P*T-	P*T-	P*T-	P*T-	P*T-	P*T-	P*T-	P*T-	P*T-	P*T-	P*T*	P*T*	P*T*	P+T-	P+T-	P*T*	P*T*	P*T-	P*T-	P*T*	P*T*	P*T*	P*T+	P*T*	*	P*T*	P*T*	P*T-	P*T-	*	*	*
					Sensitive Information (Medical)	HIV Status	Yes/No		P*T-	P*T-	P*T-	P*T-	P*T-	P*T-	P*T-	P*T*	P*T*	P*T-	P*T-	P*T-	P*T-	P*T-	P*T-	P*T-	P*T-	P*T-	P*T-	P*T*	P*T*	P*T*	P*T-	P*T-	P*T*	P*T*	P*T-	P*T-	P*T*	P*T*	P*T*	P*T*	P*T*	*	P*T*	P*T*	P*T-	P*T-	*	*	*
					Sensitive Information (Medical)	Mental Health Status	Yes/No		P*T-	P*T-	P*T-	P*T-	P*T-	P*T-	P*T-	P*T*	P*T*	P*T-	P*T-	P*T-	P*T-	P*T-	P*T-	P*T-	P*T-	P*T-	P*T-	P*T*	P*T*	P*T*	P*T-	P*T-	P*T*	P*T*	P*T-	P*T-	P*T*	P*T*	P*T+	P*T+	P*T*	*	P*T*	P*T*	P*T-	P*T-	*	*	*
					Sensitive Information (Medical)	Medications	Yes/No		P*T-	P*T-	P*T-	P*T-	P*T-	P*T-	P*T-	P*T*	P*T*	P*T-	P*T-	P*T-	P*T-	P*T-	P*T-	P*T-	P*T-	P*T-	P*T-	P*T*	P*T*	P*T*	P*T-	P*T-	P*T*	P*T*	P*T-	P*T-	P*T*	P*T*	P*T+	P*T+	P*T*	*	P*T*	P*T*	P*T-	P*T-	*	*	*
					Sensitive Information (Medical)	Substance Use	Yes/No		P*T-	P*T-	P*T-	P*T-	P*T-	P*T-	P*T-	P*T*	P*T*	P*T-	P*T-	P*T-	P*T-	P*T-	P*T-	P*T-	P*T-	P*T-	P*T-	P*T*	P*T*	P*T*	P*T-	P*T-	P*T*	P*T*	P*T-	P*T-	P*T*	P*T*	P*T*	P*T+	P*T*	*	P*T*	P*T*	P*T-	P*T-	*	*	*
					Sensitive Information (Medical)	Genetic Information	Yes/No		P*T-	P*T-	P*T-	P*T-	P*T-	P*T-	P*T-	P*T*	P*T*	P*T-	P*T-	P*T-	P*T-	P*T-	P*T-	P*T-	P*T-	P*T-	P*T-	P*T*	P*T*	P*T*	P*T-	P*T-	P*T*	P*T*	P*T-	P*T-	P*T*	P*T*	P*T*	P*T*	P*T*	*	P*T*	P*T*	P*T-	P*T-	*	*	*
					Sensitive Information (Medical)	IVF Information	Yes/No		P*T-	P*T-	P*T-	P*T-	P*T-	P*T-	P*T-	P*T*	P*T*	P*T-	P*T-	P*T-	P*T-	P*T-	P*T-	P*T-	P*T-	P*T-	P*T-	P*T*	P*T*	P*T*	P*T-	P*T-	P*T*	P*T*	P*T-	P*T-	P*T*	P*T*	P*T*	P*T*	P*T*	*	P*T*	P*T*	P*T-	P*T-	*	*	*
					Identifying Information (Strong)	Photographs of People	Yes/No		P*T-	P*T-	P*T-	P*T-	P*T-	P*T-	P*T-	P*T*	P*T*	P*T-	P*T-	P*T-	P+T-	P*T*	P*T*	P*T-	P*T-	P*T*	P*T*	P*T*	P*T*	P*T*	P*T-	P*T-	P*T*	P*T*	P*T*	P*T*	P*T*	P*T*	P*T*	P*T*	P*T*	*	P*T*	P*T*	P*T-	P+T-	*	*	*
					Other Information	Other Photographs	Yes/No		P*T-	P*T-	P*T-	P*T-	P*T-	P*T-	P*T-	P*T*	P*T*	P*T-	P*T-	P*T-	P*T-	P*T-	P*T-	P*T-	P*T-	P*T-	P*T-	P*T*	P*T*	P*T*	P+T-	P+T-	P*T*	P*T*	P*T-	P*T-	P*T*	P*T*	P*T*	P*T*	P*T*	*	P*T*	P*T*	P*T-	P*T-	*	*	*
					Identifying Information (Strong)	Social Network Credentials	Yes/No		P*T-	P*T-	P*T-	P*T-	P*T-	P*T-	P*T-	P*T*	P*T*	P*T-	P*T-	P*T-	P*T-	P+T-	P+T-	P+T-	P+T-	P+T-	P*T-	P*T*	P*T*	P*T*	P*T-	P*T-	P*T*	P*T*	P*T*	P*T*	P*T*	P*T*	P*T*	P*T*	P*T*	*	P*T*	P*T*	P*T-	P*T-	*	*	*
					Identifying Information (Strong)	Others' Contact Details	Yes/No		P*T-	P*T-	P*T-	P*T-	P*T-	P*T-	P*T-	P*T*	P*T*	P*T-	P*T-	P*T-	P*T-	P*T*	P*T*	P*T-	P*T-	P*T*	P*T*	P*T*	P*T*	P*T*	P*T-	P*T-	P*T*	P*T*	P*T*	P*T*	P*T*	P*T*	P*T*	P*T*	P*T*	*	P*T*	P*T*	P*T-	P*T-	*	*	*
					Identifying Information (Strong)	Others Email Addresses	Yes/No		P*T-	P*T-	P*T-	P*T-	P*T-	P*T-	P*T-	P*T*	P*T*	P*T-	P*T-	P*T-	P*T-	P*T*	P*T*	P*T-	P*T-	P*T*	P*T*	P*T*	P*T*	P*T*	P*T-	P*T-	P*T*	P*T*	P*T*	P*T*	P*T*	P*T*	P*T*	P*T*	P*T*	*	P*T*	P*T*	P*T-	P*T-	*	*	*
					Other Information	User Generated Content Not Previously Covered	Yes/No		P*T-	P*T-	P*T-	P*T+	P*T+	P+T-	P+T-	P*T*	P*T*	P+T+	P+T+	P+T-	P+T-	P+T-	P+T-	P+T-	P+T-	P+T-	P+T-	P*T*	P*T*	P*T*	P+T-	P+T-	P*T*	P*T*	P+T-	P+T-	P*T*	P*T*	P*T+	P*T+	P*T*	*	P*T*	P*T*	P+T-	P+T-	*	*	*
					Analytics Data	Usage Data	Yes/No		P+T-	P+T-	P+T-	P+T+	P+T+	P+T-	P+T+	P*T+	P*T*	P*T+	P*T-	P+T-	P+T+	P+T+	P+T+	P+T+	P+T+	P+T+	P+T+	P*T+	P*T*	P*T+	P*T+	P*T+	P*T*	P*T*	P+T+	P+T-	P*T*	P*T*	P*T+	P*T*	P*T*	*	P*T*	P*T*	P+T-	P+T-	*	*	*
					Identifying Information (Strong)	Device Unique Identifier	Yes/No		P*T-	P*T-	P*T-	P*T+	P*T-	P*T-	P*T-	P*T*	P*T*	P+T-	P+T-	P*T-	P*T-	P*T*	P*T*	P*T-	P*T-	P*T*	P*T*	P*T+	P*T*	P*T*	P*T+	P*T-	P*T*	P*T*	P*T*	P*T+	P*T*	P*T*	P*T*	P*T*	P*T*	*	P*T*	P*T*	P*T-	P*T-	*	*	*
					Identifying Information (Weaker)	Other Unique Identifier	Yes/No		P*T-	P*T-	P*T-	P*T-	P*T-	P*T-	P*T+	P*T*	P*T*	P*T+	P*T+	P*T-	P+T-	P*T+	P*T+	P*T-	P*T-	P*T+	P*T+	P*T+	P*T+	P*T*	P*T+	P*T+	P*T*	P*T*	P*T+	P*T-	P*T+	P*T*	P*T+	P*T+	P*T*	*	P*T*	P*T*	P*T+	P+T+	*	*	*
					Protocol-Standard Data	Device Characteristics	Yes/No		P*T+	P+T-	P+T+	P*T+	P*T+	P+T+	P+T+	P*T+	P*T+	P*T+	P*T+	P*T-	P+T+	P+T+	P+T+	P+T+	P+T+	P+T+	P+T+	P*T+	P*T+	P*T+	P*T+	P*T+	P*T+	P*T+	P*T+	P*T+	P*T+	P*T*	P*T+	P*T+	P*T*	*	P*T+	P*T+	P+T+	P+T+	*	*	*
					Protocol-Standard Data	IP Address	Yes/No		P*T+	P+T-	P+T+	P+T+	P+T+	P+T+	P+T+	P*T+	P*T+	P*T+	P*T+	P+T-	P+T+	P+T+	P+T+	P+T+	P+T+	P+T+	P+T+	P*T+	P*T+	P*T+	P+T+	P+T+	P*T+	P*T+	P*T+	P*T+	P*T+	P*T*	P*T+	P*T+	P*T*	*	P*T+	P*T+	P+T+	P+T+	*	*	*
					Identifying Information (Strong)	Financial/Payment Details	Yes/No		P*T-	P*T-	P*T-	P*T-	P*T-	P*T-	P*T-	P*T*	P*T*	P+T-	P+T-	P*T-	P+T-	P*T*	P*T*	P*T-	P*T-	P*T*	P*T*	P*T*	P*T*	P*T*	P*T-	P*T-	P*T*	P*T*	P+T-	P+T-	P*T*	P*T*	P*T*	P*T*	P*T*	*	P*T*	P*T*	P+T-	P+T-	*	*	*
						Summary of policy coverage (COMBINES PROUDCT DUPLICATES)
						Identifying Information			P*T-, P+T-	P*T-, P+T-	*	P*T-, P*T+, P+T-	*	P*T-, P*T+	*	P*T*	*	P*T-, P*T+, P+T-, P+T+	*	P*T-, P+T-	P*T-, P*T+, P+T-, P+T+	P*T-, P*T*, P*T+, P+T-	*	P*T-, P+T-, P+T+	*	P*T-, P*T*, P*T+, P+T-	*	P*T*, P*T+	P*T*, P*T+	*	P*T-, P*T*, P*T+, P+T-	P*T-, P*T*, P*T+, P+T-	P*T*	*	P*T-, P*T*, P*T+, P+T-	*	P*T*, P*T+	P*T*	P*T*, P*T+	*	P*T*	*	P*T*	*	P*T-, P*T+, P+T-, P+T+	P*T-, P*T+, P+T-, P+T+	*	*	*
						Identifying Information (Strong)			P*T-, P+T-	P*T-, P+T-	*	P*T-, P*T+, P+T-	*	P*T-	*	P*T*	*	P*T-, P+T-, P+T+	*	P*T-, P+T-	P*T-, P*T+, P+T-, P+T+	P*T*, P+T-	*	P*T-, P+T-, P+T+	*	P*T-, P*T*, P*T+, P+T-	*	P*T*, P*T+	P*T*	*	P*T-, P*T*, P*T+, P+T-	P*T-, P*T*, P+T-	P*T*	*	P*T*, P*T+, P+T-	*	P*T*	P*T*	P*T*	*	P*T*	*	P*T*	*	P*T-, P+T-	P*T-, P*T+, P+T-, P+T+	*	*	*
						Identifying Information (Weaker)			P*T-, P+T-	P*T-	*	P*T-, P+T-	*	P*T-, P*T+	*	P*T*	*	P*T+, P+T-, P+T+	*	P*T-	P*T-, P+T-, P+T+	P*T-, P*T+	*	P*T-	*	P*T-, P*T+	*	P*T*, P*T+	P*T*, P*T+	*	P*T-, P*T+, P+T-	P*T-, P*T+, P+T-	P*T*	*	P*T-, P*T*, P*T+	*	P*T*, P*T+	P*T*	P*T*, P*T+	*	P*T*	*	P*T*	*	P*T-, P*T+, P+T-, P+T+	P*T-, P*T+, P+T-, P+T+	*	*	*
						Sensitive Information			P*T-	P*T-	*	P*T-	*	P*T-	*	P*T*	*	P*T-, P+T+	*	P*T-	P*T-, P+T+	P*T-	*	P*T-	*	P*T-	*	P*T*	P*T*	*	P*T-, P+T-	P*T-, P+T-	P*T*	*	P*T-	*	P*T*	P*T*	P*T*, P*T+	*	P*T*	*	P*T*	*	P*T-	P*T-	*	*	*
						Sensitive Information (Medical)			P*T-	P*T-	*	P*T-	*	P*T-	*	P*T*	*	P*T-	*	P*T-	P*T-	P*T-	*	P*T-	*	P*T-	*	P*T*	P*T*	*	P*T-, P+T-	P*T-, P+T-	P*T*	*	P*T-	*	P*T*	P*T*	P*T*, P*T+	*	P*T*	*	P*T*	*	P*T-	P*T-	*	*	*
						Sensitive Information (Measurements)			P*T-	P*T-	*	P*T-	*	P*T-	*	P*T*	*	P+T+	*	P*T-	P*T-	P*T-	*	P*T-	*	P*T-	*	P*T*	P*T*	*	P*T-	P*T-	P*T*	*	P*T-	*	P*T*	P*T*	P*T*	*	P*T*	*	P*T*	*	P*T-	P*T-	*	*	*
						Sensitive Information (Other)			P*T-	P*T-	*	P*T-	*	P*T-	*	P*T*	*	P*T-	*	P*T-	P*T-, P+T+	P*T-	*	P*T-	*	P*T-	*	P*T*	P*T*	*	P*T-	P*T-	P*T*	*	P*T-	*	P*T*	P*T*	P*T*, P*T+	*	P*T*	*	P*T*	*	P*T-	P*T-	*	*	*
						Other Information			P*T-	P*T-	*	P*T-, P*T+	*	P*T-, P+T-	*	P*T*	*	P*T-, P+T+	*	P*T-, P+T-	P*T-, P+T-, P+T+	P*T-, P+T-	*	P*T-, P+T-	*	P*T-, P+T-	*	P*T*	P*T*	*	P*T-, P+T-	P*T-, P+T-	P*T*	*	P*T-, P+T-	*	P*T*	P*T*	P*T*, P*T+	*	P*T*	*	P*T*	*	P*T-, P+T-	P*T-, P+T-	*	*	*
						Protocol-Standard Data (X)			0	0	*	0	*	0	*	0	*	0	*	0	0	0	*	0	*	0	*	0	0	*	0	0	0	*	0	*	0	0	0	*	0	*	0	*	0	0	*	*	*
						Analytics Data			P+T-	P+T-	*	P+T+	*	P+T-, P+T+	*	P*T*, P*T+	*	P*T-, P*T+	*	P+T-	P+T+	P+T+	*	P+T+	*	P+T+	*	P*T+	P*T*, P*T+	*	P*T+	P*T+	P*T*	*	P+T-, P+T+	*	P*T*	P*T*	P*T*, P*T+	*	P*T*	*	P*T*	*	P+T-	P+T-	*	*	*
						ALL			0, P*T-, P+T-	0, P*T-, P+T-	*	0, P*T-, P*T+, P+T-, P+T+	*	0, P*T-, P*T+, P+T-, P+T+	*	0, P*T*, P*T+	*	0, P*T-, P*T+, P+T-, P+T+	*	0, P*T-, P+T-	0, P*T-, P*T+, P+T-, P+T+	0, P*T-, P*T*, P*T+, P+T-, P+T+	*	0, P*T-, P+T-, P+T+	*	0, P*T-, P*T*, P*T+, P+T-, P+T+	*	0, P*T*, P*T+	0, P*T*, P*T+	*	0, P*T-, P*T*, P*T+, P+T-	0, P*T-, P*T*, P*T+, P+T-	0, P*T*	*	0, P*T-, P*T*, P*T+, P+T-, P+T+	*	0, P*T*, P*T+	0, P*T*	0, P*T*, P*T+	*	0, P*T*	*	0, P*T*	*	0, P*T-, P*T+, P+T-, P+T+	0, P*T-, P*T+, P+T-, P+T+	*	*	*
						Doesn't Contradict Policy			Yes	Yes	*	No	*	No	*	No	*	No	*	Yes	No	No	*	Yes	*	No	*	No	No	*	No	No	Yes	*	No	*	No	Yes	No	*	Yes	*	Yes	*	No	No	*	*	*
						Platform			iPhone	iPhone	Android	iPhone	Android	iPhone/iPad	Android	iPhone	Android Phone	iPhone	Android Phone	Android Phone	iPhone	iPhone/iPad	Android	iPhone/iPad	Android	iPhone/iPad	Android	iPhone	iPhone/iPad	Android	iPhone	iPhone	iPhone	Android	iPhone	Android	iPhone	iPhone/iPad	iPhone	Android	iPhone	iPhone	iPhone	Android Phone	Android	Android	iPhone	Android	iPhone
						FirstVersion			No	No	Yes	No	Yes	No	No	No	No	No	No	No	Yes	No	No	Yes	Yes	No	No	Yes	Yes	Yes	Yes	Yes	Yes	Yes	No	No	Yes	No	No	No	No	No	No	No	No	No	Yes	Yes	No
						HasAnyPrivacyPolicy			Yes	Yes	Yes	Yes	Yes	Yes	Yes	No	No	Yes	Yes	Yes	Yes	Yes	Yes	Yes	Yes	Yes	Yes	No	No	No	Yes	Yes	Yes	Yes	Yes	Yes	No	No	Yes	Yes	No	Yes	No	No	Yes	Yes	Yes	Yes	Yes
						HasAnyPrivacyMarketingPolicy			Yes	Yes	Yes	Yes	Yes	Yes	Yes	No	No	Yes	Yes	Yes	Yes	Yes	Yes	Yes	Yes	Yes	Yes	No	No	No	Yes	Yes	Yes	Yes	Yes	Yes	No	No	Yes	Yes	No	Yes	No	No	Yes	Yes	Yes	Yes	Yes
						UsesCookies			Yes	No	No	No	No	Yes	No	Yes	No	No	No	No	Yes	No	No	Yes	Yes	Yes	No	No	Yes	No	Yes	Yes	No	No	No	No	No	No	Yes	No	No	No	Yes	No	No	No	No	No	No
						AdvertisersTransmitsOrDisplays			No	No	No	No	No	No	No	No	No	No	No	No	No	No	No	Yes	No	Yes	Yes	No	No	No	Yes	Yes	No	No	No	No	No	No	No	No	No	No	No	No	Yes	No	No	No	No
						HasDataEntryAffordances			Yes	No	No	Yes	Yes	Yes	Yes	No	No	Yes	Yes	Yes	Yes	Yes	Yes	Yes	Yes	Yes	Yes	Yes	Yes	No	Yes	Yes	Yes	Yes	Yes	Yes	No	Yes	Yes	Yes	Yes	No	No	No	Yes	Yes	No	No	No
						TransmitsNonUsageDeviceData			No	No	*	Yes	*	Yes	*	No	*	Yes	*	No	Yes	Yes	*	Yes	*	Yes	*	Yes	Yes	*	Yes	Yes	No	*	Yes	*	Yes	No	Yes	*	No	*	No	*	Yes	Yes	*	*	*
						Third Party Transmission			Yes	No	Yes	Yes	Yes	No	Yes	Yes	Yes	Yes	Yes	No	No	No	No	Yes	Yes	Yes	Yes	Yes	Yes	Yes	Yes	Yes	Yes	Yes	Yes	Yes	Yes	No	Yes	No	No	No	Yes	Yes	Yes	No	No	No	No
						PRODUCT TRANSMISSION
						Online Services			No	No	*	Yes (Developer)	*	Yes (Developer)	*	No	*	Yes (Developer)	*	No	Yes (Developer)	Yes (Developer)	*	No	*	Yes (Developer)	*	No	No	*	No	No	No	*	No	*	No	No	Yes (Developer)	*	No	*	No	*	Yes (Developer)	Yes (Developer)	*	*	*
						Online Services Purposes			*	*	*	Social Sharing	*	Unclear	*	*	*	App Functions, Host User Data	*	*	Host User Data, App Functions	Research	*	*	*	Research	*	*	*	*	*	*	*	*	*	*	*	*	Research	*	*	*	*	*	App Functions	Host User Data, App Functions	*	*	*
						Online Services Countries			*	*	*	GB	*	*	*	*	*	GB	*	*	GB	GB	*	*	*	GB	*	*	*	*	*	*	*	*	*	*	*	*	US	*	*	*	*	*	NL	GB	*	*	*
						Online Services Unencrypted			*	*	*	No	*	No	*	*	*	No	*	*	No	No	*	*	*	No	*	*	*	*	*	*	*	*	*	*	*	*	No	*	*	*	*	*	No	No	*	*	*
						Third Parties			Yes	Yes	*	Yes	*	Yes	*	Yes	*	Yes	*	No	No	No	*	Yes	*	Yes	*	Yes	Yes	*	Yes	Yes	Yes	*	Yes	*	Yes	No	Yes	*	No	*	Yes	*	Yes	No	*	*	*
						Third Party Countries			GB	*	*	GB, US	*	GB, US	*	GB, US	*	US	*	*	*	*	*	GB, US	*	GB, US	*	US	US	*	US	US	*	*	US	*	US	*	US	*	*	*	*	*	US	*	*	*	*
						Advertisers			No	No	*	No	*	No	*	No	*	No	*	No	No	No	*	Yes	*	Yes	*	No	No	*	Yes	Yes	No	*	No	*	No	No	No	*	No	*	No	*	Yes	No	*	*	*
						AdvertisersCountries			*	*	*	*	*	*	*	*	*	*	*	*	*	*	*	GB	*	GB, US	*	*	*	*	US	US	*	*	*	*	*	*	*	*	*	*	*	*	US	*	*	*	*
						Analytics			No	No	*	Yes	*	Yes	*	Yes	*	Yes	*	No	No	No	*	No	*	No	*	Yes	Yes	*	Yes	Yes	No	*	Yes	*	No	No	Yes	*	No	*	No	*	No	No	*	*	*
						AnalyticsCountries			*	*	*	US	*	GB, US	*	US	*	US	*	*	*	*	*	*	*	*	*	US	US	*	US	US	*	*	US	*	*	*	US	*	*	*	*	*	*	*	*	*	*
						ContentLoading			Yes	Yes	*	Yes	*	Yes	*	Yes	*	No	*	No	No	No	*	Yes	*	Yes	*	No	Yes	*	Yes	Yes	Yes	*	Yes	*	Yes	No	Yes	*	No	*	Yes	*	Yes	No	*	*	*
						ContentLoadingCountries			GB	*	*	GB	*	*	*	GB, US	*	*	*	*	*	*	*	US	*	*	*	*	*	*	US	*	*	*	*	*	US	*	*	*	*	*	*	*	*	*	*	*	*
						AppTransmitsData			Yes	Yes	*	Yes	*	Yes	*	Yes	*	Yes	*	No	Yes	Yes	*	Yes	*	Yes	*	Yes	Yes	*	Yes	Yes	Yes	*	Yes	*	Yes	No	Yes	*	No	*	Yes	*	Yes	Yes	*	*	*
						AppTransmitsPID			No	No	*	Yes	*	No	*	No	*	Yes	*	No	Yes	No	*	Yes	*	Yes	*	Yes	No	*	Yes	No	No	*	Yes	*	No	No	Yes	*	No	*	No	*	No	Yes	*	*	*
						TransmissionCountries			GB	*	*	GB, US	*	GB, US	*	GB, US	*	GB, US	*	*	GB	GB	*	GB, US	*	GB, US	*	US	US	*	US	US	*	*	US	*	US	*	US	*	*	*	*	*	NL, US	GB	*	*	*
						NoTransmission			No	No	*	No	*	No	*	No	*	No	*	Yes	No	No	*	No	*	No	*	No	No	*	No	No	No	*	No	*	No	Yes	No	*	Yes	*	No	*	No	No	*	*	*
						AppCollectsOrTransmitsData			Yes	Yes	*	Yes	*	Yes	*	Yes	*	Yes	*	Yes	Yes	Yes	*	Yes	*	Yes	*	Yes	Yes	*	Yes	Yes	Yes	*	Yes	*	Yes	Yes	Yes	*	Yes	*	Yes	*	Yes	Yes	*	*	*
						AppCollectsStoresOrTransmitsData			Yes	Yes	*	Yes	*	Yes	*	Yes	*	Yes	*	Yes	Yes	Yes	*	Yes	*	Yes	*	Yes	Yes	*	Yes	Yes	Yes	*	Yes	*	Yes	Yes	Yes	*	Yes	*	Yes	*	Yes	Yes	*	*	*
						AppCollectsStoresOrTransmitsPID			No	No	*	Yes	*	No	*	No	*	Yes	*	Yes	Yes	Yes	*	Yes	*	Yes	*	Yes	No	*	Yes	Yes	Yes	*	Yes	*	No	Yes	Yes	*	Yes	*	No	*	No	Yes	*	*	*
						PRODUCT ADVERTISING
						Display Adverts			No	No	*	No	*	No	*	No	*	No	*	No	No	No	*	No	*	No	*	No	No	*	Yes	Yes	No	*	No	*	No	No	No	*	No	*	No	*	Yes	No	*	*	*
						Displays Adverts or Transmits Data			No	No	*	No	*	No	*	No	*	No	*	No	No	No	*	Yes	*	Yes	*	No	No	*	Yes	Yes	No	*	No	*	No	No	No	*	No	*	No	*	Yes	No	*	*	*
						PlatformiOS			iPhone	iPhone	*	iPhone	*	iPhone/iPad	*	iPhone	*	iPhone	*	No	iPhone	iPhone/iPad	*	iPhone/iPad	*	iPhone/iPad	*	iPhone	iPhone/iPad	*	iPhone	iPhone	iPhone	*	iPhone	*	iPhone	iPhone/iPad	iPhone	*	iPhone	iPhone	iPhone	*	No	No	iPhone	*	iPhone
						PlatformAndroid			No	Android	*	Android	*	Android	*	Android Phone	*	Android Phone	*	Android Phone	No	Android	*	Android	*	Android	*	No	Android	*	No	No	Android	*	Android	*	No	No	Android	*	No	No	Android Phone	*	Android	Android	Android	*	Android
						PlatformVersion			2.1	1.12 / 1.0	*	2.0 / 1.0	*	1.5 / 1.6	*	2.1 / 1.06	*	2.4.1 / 2.2.5	*	1.01	1.0	1.6 / 1.4	*	1.0	*	1.4 / 1.2	*	1.0.0	1.0	*	1.0	1.0	1.0	*	331 / 1.4	*	1.0	1.4	1.2 / 1.3	*	4.3	*	1.3 / 1.1	*	0.2	1.2	*	*	*
						PlatformiOSVersion			2.1	1.12	*	2.0	*	1.5	*	2.1	*	2.4.1	*	*	1.0	1.6	*	1.0	*	1.4	*	1.0.0	1.0	*	1.0	1.0	1.0	*	331	*	1.0	1.4	1.2	*	4.3	0.35	1.3	*	*	*	1.0	*	1.3
						PlatformAndroidVersion			*	1.0	*	1.0	*	1.6	*	1.06	*	2.2.5	*	1.01	*	1.4	*	1.0	*	1.2	*	*	1.0	*	*	*	1.0	*	1.4	*	*	*	1.3	*	*	*	1.1	*	0.2	1.2	1.0	*	1.5
						Per-app THIRD PARTY transmissions
					Identifying Information (Weaker)	Name (First or Unspecified)	Yes/No		*	*	*	*	*	*	*	*	*	*	*	*	*	*	*	*	*	*	*	*	*	*	*	*	*	*	*	*	*	*	*	*	*	*	*	*	*	*	*	*	*
					Identifying Information (Strong)	Full Name	Yes/No		*	*	*	*	*	*	*	*	*	*	*	*	*	*	*	*	*	*	*	*	*	*	*	*	*	*	*	*	*	*	*	*	*	*	*	*	*	*	*	*	*
					Identifying Information (Weaker)	Age or Year of Birth	Yes/No		*	*	*	*	*	*	*	*	*	*	*	*	*	*	*	*	*	*	*	*	*	*	*	*	*	*	*	*	*	*	*	*	*	*	*	*	*	*	*	*	*
					Identifying Information (Strong)	Date of Birth	Yes/No		*	*	*	*	*	*	*	*	*	*	*	*	*	*	*	*	*	*	*	*	*	*	*	*	*	*	*	*	*	*	*	*	*	*	*	*	*	*	*	*	*
					Identifying Information (Weaker)	Gender	Yes/No		*	*	*	*	*	*	*	*	*	*	*	*	*	*	*	*	*	*	*	*	*	*	*	*	*	*	*	*	*	*	*	*	*	*	*	*	*	*	*	*	*
					Sensitive Information (Other)	Ethnicity	Yes/No		*	*	*	*	*	*	*	*	*	*	*	*	*	*	*	*	*	*	*	*	*	*	*	*	*	*	*	*	*	*	*	*	*	*	*	*	*	*	*	*	*
					Sensitive Information (Other)	Sexuality	Yes/No		*	*	*	*	*	*	*	*	*	*	*	*	*	*	*	*	*	*	*	*	*	*	*	*	*	*	*	*	*	*	*	*	*	*	*	*	*	*	*	*	*
					Sensitive Information (Other)	Political Affiliation	Yes/No		*	*	*	*	*	*	*	*	*	*	*	*	*	*	*	*	*	*	*	*	*	*	*	*	*	*	*	*	*	*	*	*	*	*	*	*	*	*	*	*	*
					Sensitive Information (Other)	Religious Beliefs	Yes/No		*	*	*	*	*	*	*	*	*	*	*	*	*	*	*	*	*	*	*	*	*	*	*	*	*	*	*	*	*	*	*	*	*	*	*	*	*	*	*	*	*
					Sensitive Information (Other)	Employment Status	Yes/No		*	*	*	*	*	*	*	*	*	*	*	*	*	*	*	*	*	*	*	*	*	*	*	*	*	*	*	*	*	*	*	*	*	*	*	*	*	*	*	*	*
					Sensitive Information (Medical)	Disability Status	Yes/No		*	*	*	*	*	*	*	*	*	*	*	*	*	*	*	*	*	*	*	*	*	*	*	*	*	*	*	*	*	*	*	*	*	*	*	*	*	*	*	*	*
					Identifying Information (Strong)	Postal Address	Yes/No		*	*	*	*	*	*	*	*	*	*	*	*	*	*	*	*	*	*	*	*	*	*	*	*	*	*	*	*	*	*	*	*	*	*	*	*	*	*	*	*	*
					Identifying Information (Strong)	Full Postcode	Yes/No		*	*	*	*	*	*	*	*	*	*	*	*	*	*	*	*	*	*	*	*	*	*	*	*	*	*	*	*	*	*	*	*	*	*	*	*	*	*	*	*	*
					Identifying Information (Weaker)	Country or Area or Partial Postcode	Yes/No		*	*	*	*	Yes (HTTP)	*	*	*	*	Yes (HTTP)	Yes (HTTP)	*	*	*	*	*	*	*	*	Yes (HTTPS)	*	*	Yes (HTTP)	Yes (HTTP)	*	*	Yes (HTTP)	Yes (HTTP)	*	*	*	*	*	*	*	*	*	*	*	*	*
					Identifying Information (Weaker)	Geolocation	Yes/No		*	*	*	*	*	*	*	*	*	*	*	*	*	*	*	*	*	*	*	*	Yes (HTTP)	*	*	*	*	*	*	*	*	*	*	*	*	*	*	*	*	*	*	*	*
					Identifying Information (Strong)	Email Address	Yes/No		*	*	*	*	*	*	*	*	*	*	*	*	*	*	*	Yes (HTTPS)	*	Yes (HTTPS)	Yes (HTTPS)	*	*	*	*	*	*	*	*	*	*	*	*	*	*	*	*	*	*	*	*	*	*
					Identifying Information (Strong)	Telephone Numbers	Yes/No		*	*	*	*	*	*	*	*	*	*	*	*	*	*	*	*	*	*	*	*	*	*	*	*	*	*	*	*	*	*	*	*	*	*	*	*	*	*	*	*	*
					Identifying Information (Strong)	Username	Yes/No		*	*	*	*	*	*	*	*	*	*	*	*	*	*	*	*	*	*	*	*	*	*	*	*	*	*	*	*	*	*	*	*	*	*	*	*	*	*	*	*	*
					Identifying Information (Strong)	Password	Yes/No		*	*	*	*	*	*	*	*	*	*	*	*	*	*	*	*	*	*	*	*	*	*	*	*	*	*	*	*	*	*	*	*	*	*	*	*	*	*	*	*	*
					Identifying Information (Strong)	Medical System Numbers	Yes/No		*	*	*	*	*	*	*	*	*	*	*	*	*	*	*	*	*	*	*	*	*	*	*	*	*	*	*	*	*	*	*	*	*	*	*	*	*	*	*	*	*
					Identifying Information (Strong)	Social Security Number	Yes/No		*	*	*	*	*	*	*	*	*	*	*	*	*	*	*	*	*	*	*	*	*	*	*	*	*	*	*	*	*	*	*	*	*	*	*	*	*	*	*	*	*
					Other Information	Hobbies and Interests	Yes/No		*	*	*	*	*	*	*	*	*	*	*	*	*	*	*	*	*	*	*	*	*	*	*	*	*	*	*	*	*	*	*	*	*	*	*	*	*	*	*	*	*
					Sensitive Information (Measurements)	Measured Health Parameters	Yes/No		*	*	*	*	*	*	*	*	*	*	*	*	*	*	*	*	*	*	*	*	*	*	*	*	*	*	*	*	*	*	*	*	*	*	*	*	*	*	*	*	*
					Sensitive Information (Medical)	Medical History	Yes/No		*	*	*	*	*	*	*	*	*	*	*	*	*	*	*	*	*	*	*	*	*	*	*	*	*	*	*	*	*	*	*	*	*	*	*	*	*	*	*	*	*
					Sensitive Information (Medical)	HIV Status	Yes/No		*	*	*	*	*	*	*	*	*	*	*	*	*	*	*	*	*	*	*	*	*	*	*	*	*	*	*	*	*	*	*	*	*	*	*	*	*	*	*	*	*
					Sensitive Information (Medical)	Mental Health Status	Yes/No		*	*	*	*	*	*	*	*	*	*	*	*	*	*	*	*	*	*	*	*	*	*	*	*	*	*	*	*	*	*	*	*	*	*	*	*	*	*	*	*	*
					Sensitive Information (Medical)	Medications	Yes/No		*	*	*	*	*	*	*	*	*	*	*	*	*	*	*	*	*	*	*	*	*	*	*	*	*	*	*	*	*	*	*	*	*	*	*	*	*	*	*	*	*
					Sensitive Information (Medical)	Substance Use	Yes/No		*	*	*	*	*	*	*	*	*	*	*	*	*	*	*	*	*	*	*	*	*	*	*	*	*	*	*	*	*	*	*	*	*	*	*	*	*	*	*	*	*
					Sensitive Information (Medical)	Genetic Information	Yes/No		*	*	*	*	*	*	*	*	*	*	*	*	*	*	*	*	*	*	*	*	*	*	*	*	*	*	*	*	*	*	*	*	*	*	*	*	*	*	*	*	*
					Sensitive Information (Medical)	IVF Information	Yes/No		*	*	*	*	*	*	*	*	*	*	*	*	*	*	*	*	*	*	*	*	*	*	*	*	*	*	*	*	*	*	*	*	*	*	*	*	*	*	*	*	*
					Identifying Information (Strong)	Photographs of People	Yes/No		*	*	*	*	*	*	*	*	*	*	*	*	*	*	*	*	*	*	*	*	*	*	*	*	*	*	*	*	*	*	*	*	*	*	*	*	*	*	*	*	*
					Other Information	Other Photographs	Yes/No		*	*	*	*	*	*	*	*	*	*	*	*	*	*	*	*	*	*	*	*	*	*	*	*	*	*	*	*	*	*	*	*	*	*	*	*	*	*	*	*	*
					Identifying Information (Strong)	Social Network Credentials	Yes/No		*	*	*	*	*	*	*	*	*	*	*	*	*	*	*	*	*	*	*	*	*	*	*	*	*	*	*	*	*	*	*	*	*	*	*	*	*	*	*	*	*
					Identifying Information (Strong)	Others' Contact Details	Yes/No		*	*	*	*	*	*	*	*	*	*	*	*	*	*	*	*	*	*	*	*	*	*	*	*	*	*	*	*	*	*	*	*	*	*	*	*	*	*	*	*	*
					Identifying Information (Strong)	Others Email Addresses	Yes/No		*	*	*	*	*	*	*	*	*	*	*	*	*	*	*	*	*	*	*	*	*	*	*	*	*	*	*	*	*	*	*	*	*	*	*	*	*	*	*	*	*
					Other Information	User Generated Content Not Previously Covered	Yes/No		*	*	*	Yes (HTTP)	Yes (HTTP)	*	*	*	*	*	*	*	*	*	*	*	*	*	*	*	*	*	*	*	*	*	*	*	*	*	*	*	*	*	*	*	*	*	*	*	*
					Analytics Data	Usage Data	Yes/No		*	*	*	Yes (HTTP)	Yes (HTTP)	*	Yes (HTTPS)	Yes (HTTP)	*	Yes (HTTP)	*	*	*	*	*	Yes (HTTP)	Yes (HTTP)	*	*	Yes (HTTPS)	*	Yes (HTTP)	Yes (HTTP)	Yes (HTTP)	*	*	Yes (HTTP)	*	*	*	Yes (HTTPS)	*	*	*	*	*	*	*	*	*	*
					Identifying Information (Strong)	Device Unique Identifier	Yes/No		*	*	*	Yes (HTTP)	*	*	*	*	*	*	*	*	*	*	*	*	*	*	*	Yes (HTTPS)	*	*	Yes (HTTP)	*	*	*	*	Yes (HTTP)	*	*	*	*	*	*	*	*	*	*	*	*	*
					Identifying Information (Weaker)	Other Unique Identifier	Yes/No		*	*	*	*	*	*	Yes (HTTPS)	*	*	*	*	*	*	*	*	*	*	*	*	Yes (HTTPS)	Yes (HTTP)	*	Yes (HTTP)	Yes (HTTP)	*	*	Yes (HTTP)	*	Yes (HTTP)	*	Yes (HTTPS)	*	*	*	*	*	Yes (HTTP)	*	*	*	*
					Protocol-Standard Data	Device Characteristics	Yes/No		Yes (HTTP)	*	Yes (HTTP)	Yes (HTTP)	Yes (HTTP)	*	Yes (HTTP, HTTPS)	Yes (HTTP)	Yes (HTTP)	Yes (HTTP)	Yes (HTTP)	*	*	*	*	Yes (HTTP)	Yes (HTTP)	Yes (HTTP)	Yes (HTTP)	Yes (HTTPS)	Yes (HTTP)	Yes (HTTP)	Yes (HTTP)	Yes (HTTP)	Yes (HTTP)	Yes (HTTP)	Yes (HTTP)	Yes (HTTP)	Yes (HTTP)	*	Yes (HTTP, HTTPS)	*	*	*	Yes (HTTP)	Yes (HTTP)	Yes (HTTP)	*	*	*	*
					Protocol-Standard Data	IP Address	Yes/No		Yes (HTTP)	*	Yes (HTTP)	Yes (HTTP)	Yes (HTTP)	*	Yes (HTTP, HTTPS)	Yes (HTTP)	Yes (HTTP)	Yes (HTTP)	Yes (HTTP)	*	*	*	*	Yes (HTTP)	Yes (HTTP)	Yes (HTTP)	Yes (HTTP)	Yes (HTTPS)	Yes (HTTP)	Yes (HTTP)	Yes (HTTP)	Yes (HTTP)	Yes (HTTP)	Yes (HTTP)	Yes (HTTP)	Yes (HTTP)	Yes (HTTP)	*	Yes (HTTP, HTTPS)	*	*	*	Yes (HTTP)	Yes (HTTP)	Yes (HTTP)	*	*	*	*
					Identifying Information (Strong)	Financial/Payment Details	Yes/No		*	*	*	*	*	*	*	*	*	*	*	*	*	*	*	*	*	*	*	*	*	*	*	*	*	*	*	*	*	*	*	*	*	*	*	*	*	*	*	*	*
						Summary of THIRD PARTY transmissions (COMBINES PRODUCT DUPLICATES)
						Identifying Information	Yes/No		No	No	*	Yes (HTTPS)	*	Yes (HTTPS)	*	No	*	Yes (HTTPS)	*	No	No	No	*	Yes (HTTPS)	*	Yes (HTTPS)	*	Yes (HTTPS)	Yes (HTTPS)	*	Yes (HTTPS)	Yes (HTTPS)	No	*	Yes (HTTPS)	*	Yes (HTTPS)	No	Yes (HTTPS)	*	No	*	No	*	Yes (HTTPS)	No	*	*	*
						Identifying Information (Strong)	Yes/No		No	No	*	Yes (HTTPS)	*	No	*	No	*	No	*	No	No	No	*	Yes (HTTPS)	*	Yes (HTTPS)	*	Yes (HTTPS)	No	*	Yes (HTTPS)	No	No	*	Yes (HTTPS)	*	No	No	No	*	No	*	No	*	No	No	*	*	*
						Identifying Information (Weaker)	Yes/No		No	No	*	Yes (HTTPS)	*	Yes (HTTPS)	*	No	*	Yes (HTTPS)	*	No	No	No	*	No	*	No	*	Yes (HTTPS)	Yes (HTTPS)	*	Yes (HTTPS)	Yes (HTTPS)	No	*	Yes (HTTPS)	*	Yes (HTTPS)	No	Yes (HTTPS)	*	No	*	No	*	Yes (HTTPS)	No	*	*	*
						Sensitive Information	Yes/No		No	No	*	No	*	No	*	No	*	No	*	No	No	No	*	No	*	No	*	No	No	*	No	No	No	*	No	*	No	No	No	*	No	*	No	*	No	No	*	*	*
						Health Information	Yes/No		No	No	*	No	*	No	*	No	*	No	*	No	No	No	*	No	*	No	*	No	No	*	No	No	No	*	No	*	No	No	No	*	No	*	No	*	No	No	*	*	*
						Sensitive Information (Medical)	Yes/No		No	No	*	No	*	No	*	No	*	No	*	No	No	No	*	No	*	No	*	No	No	*	No	No	No	*	No	*	No	No	No	*	No	*	No	*	No	No	*	*	*
						Sensitive Information (Measurements)	Yes/No		No	No	*	No	*	No	*	No	*	No	*	No	No	No	*	No	*	No	*	No	No	*	No	No	No	*	No	*	No	No	No	*	No	*	No	*	No	No	*	*	*
						Sensitive Information (Other)	Yes/No		No	No	*	No	*	No	*	No	*	No	*	No	No	No	*	No	*	No	*	No	No	*	No	No	No	*	No	*	No	No	No	*	No	*	No	*	No	No	*	*	*
						Other Information	Yes/No		No	No	*	Yes (HTTPS)	*	No	*	No	*	No	*	No	No	No	*	No	*	No	*	No	No	*	No	No	No	*	No	*	No	No	No	*	No	*	No	*	No	No	*	*	*
						Protocol-Standard Data	Yes/No		Yes (HTTPS)	Yes (HTTPS)	*	Yes (HTTPS)	*	Yes (HTTP)	*	Yes (HTTPS)	*	Yes (HTTPS)	*	No	No	No	*	Yes (HTTPS)	*	Yes (HTTPS)	*	Yes (HTTPS)	Yes (HTTPS)	*	Yes (HTTPS)	Yes (HTTPS)	Yes (HTTPS)	*	Yes (HTTPS)	*	Yes (HTTPS)	No	Yes (HTTP)	*	No	*	Yes (HTTPS)	*	Yes (HTTPS)	No	*	*	*
						Analytics Data	Yes/No		No	No	*	Yes (HTTPS)	*	Yes (HTTPS)	*	Yes (HTTPS)	*	Yes (HTTPS)	*	No	No	No	*	Yes (HTTPS)	*	No	*	Yes (HTTPS)	Yes (HTTPS)	*	Yes (HTTPS)	Yes (HTTPS)	No	*	Yes (HTTPS)	*	No	No	Yes (HTTPS)	*	No	*	No	*	No	No	*	*	*
						ALL			(HTTPS)	(HTTPS)	*	(HTTPS)	*	(HTTP), (HTTPS)	*	(HTTPS)	*	(HTTPS)	*	*	*	*	*	(HTTPS)	*	(HTTPS)	*	(HTTPS)	(HTTPS)	*	(HTTPS)	(HTTPS)	(HTTPS)	*	(HTTPS)	*	(HTTPS)	*	(HTTP), (HTTPS)	*	*	*	(HTTPS)	*	(HTTPS)	*	*	*	*
						Identifying Information (Strong) OR Sensitive Information			No	No	*	(HTTPS)	*	No	*	No	*	No	*	No	No	No	*	(HTTPS)	*	(HTTPS)	*	(HTTPS)	No	*	(HTTPS)	No	No	*	(HTTPS)	*	No	No	No	*	No	*	No	*	No	No	*	*	*
						Identifying Information AND Sensitive Information			No	No	*	No	*	No	*	No	*	No	*	No	No	No	*	No	*	No	*	No	No	*	No	No	No	*	No	*	No	No	No	*	No	*	No	*	No	No	*	*	*
						Any justification for…
						Geolocation			No	No	No	No	No	No	No	No	No	Yes	Yes	No	Yes	No	No	No	No	No	No	No	Yes	No	No	No	No	No	No	No	No	No	No	No	No	No	No	No	Yes	No	No	No	No
						Camera access			No	No	No	No	No	No	No	No	No	Yes	Yes	No	Yes	No	No	No	No	No	No	No	No	No	Yes	Yes	No	No	Yes	Yes	No	No	No	No	Yes	No	No	No	No	Yes	No	No	No
						Contacts access			No	No	No	Yes	Yes	No	No	No	No	Yes	Yes	Yes	Yes	No	No	No	No	No	No	Yes	No	No	No	No	No	No	Yes	Yes	No	No	Yes	Yes	No	No	No	No	Yes	Yes	Yes	Yes	No
						Calendar access			No	No	No	No	No	No	No	No	No	No	No	No	No	No	No	No	No	No	No	Yes	No	No	No	No	No	No	Yes	Yes	No	No	No	No	No	No	No	No	No	No	No	No	No
[truncated: 91 more columns]

## Sheet: Table - Characteristics
	{Table}
	Basic characteristics
	n	79			4		37		38			58		21
					By platform							By payment model
		All (n=79)			Android-only (n=4)		iOS-only (n=37)		Multi-platform (n=38)			Free (n=58)		Paid (n=21)
	Characteristic	n	(%)		n	(%)	n	(%)	n	(%)		n	(%)	n	(%)
	Platform
	Both platforms	38	0.481013		0	0	0	0	38	1		29	0.5	9	0.428571
	iOS-only	37	0.468354		0	0	37	1	0	0		26	0.448276	11	0.52381
	Android-only	4	0.0506329		4	1	0	0	0	0		3	0.0517241	1	0.047619
	Up-front cost
	Free	58	0.734177		3	0.75	26	0.702703	29	0.763158		58	1	0	0
	Paid	21	0.265823		1	0.25	11	0.297297	9	0.236842		0	0	21	1
	Median of paid	1.99			0.69		2.99		1.99			-		1.99
	Version history
	First release	17	0.21519		0	0	9	0.243243	8	0.210526		9	0.155172	8	0.380952
	Older	62	0.78481		4	1	28	0.756757	30	0.789474		49	0.844828	13	0.619048
	App purposes
	Healthy living and health promotion	21	0.265823		0	0	8	0.216216	13	0.342105		19	0.327586	2	0.0952381		Health promotion
	Exercise and weight loss	8	0.101266		0	0	3	0.0810811	5	0.131579		6	0.103448	2	0.0952381		Exercise/Weight Loss
	Smoking cessation	6	0.0759494		0	0	2	0.0540541	4	0.105263		5	0.0862069	1	0.047619		Smoking
	Alcohol harm reduction	8	0.101266		0	0	2	0.0540541	6	0.157895		8	0.137931	0	0		Alcohol
	Drug use	5	0.0632911		0	0	0	0	5	0.131579		5	0.0862069	0	0		Drugs
	Sexual health	5	0.0632911		0	0	0	0	5	0.131579		5	0.0862069	0	0		Sexual Health
	Self-management	16	0.202532		1	0.25	6	0.162162	9	0.236842		11	0.189655	5	0.238095		Self-Management
	Long-term conditions	10	0.126582		0	0	4	0.108108	6	0.157895		8	0.137931	2	0.0952381		LTC
	Diabetes	5	0.0632911		0	0	2	0.0540541	3	0.0789474		4	0.0689655	1	0.047619		Diabetes
	Hypertension	2	0.0253165		0	0	1	0.027027	1	0.0263158		2	0.0344828	0	0		Hypertension
	Epilepsy	1	0.0126582		0	0	1	0.027027	0	0		1	0.0172414	0	0		Epilepsy
	Parkinson's disease	1	0.0126582		0	0	0	0	1	0.0263158		1	0.0172414	0	0		Parkinson
	Sickle cell anaemia	1	0.0126582		0	0	1	0.027027	0	0		1	0.0172414	0	0		Sickle Cell Anaemia
	Stroke	1	0.0126582		0	0	0	0	1	0.0263158		1	0.0172414	0	0		Stroke
	Therapy-related management	11	0.139241		1	0.25	8	0.216216	2	0.0526316		3	0.0517241	8	0.380952		Therapy Management
	Self-assessment	9	0.113924		2	0.5	2	0.0540541	5	0.131579		6	0.103448	3	0.142857		Self-Assessment
	Symptom or risk checker	8	0.101266		2	0.5	1	0.027027	5	0.131579		6	0.103448	2	0.0952381		Checker
	Symptom checker	4	0.0506329		1	0.25	1	0.027027	2	0.0526316		4	0.0689655	0	0		Symptom
	Risk checker	4	0.0506329		1	0.25	0	0	3	0.0789474		2	0.0344828	2	0.0952381		Risk
	Service directory or finder	9	0.113924		1	0.25	2	0.0540541	6	0.157895		9	0.155172	0	0		Service Directory
	Information provision	46	0.582278		1	0.25	20	0.540541	25	0.657895		35	0.603448	11	0.52381		Information
	Diary or personal health record	27	0.341772		0	0	19	0.513514	8	0.210526		15	0.258621	12	0.571429		Diary
	Medication management	3	0.0379747		0	0	2	0.0540541	1	0.0263158		2	0.0344828	1	0.047619		Medication
	Assistive technologies	4	0.0506329		0	0	3	0.0810811	1	0.0263158		4	0.0689655	0	0		Assistive
	Social networking	4	0.0506329		1	0.25	3	0.0810811	0	0		4	0.0689655	0	0		Social Network
	Reminders	4	0.0506329		0	0	2	0.0540541	2	0.0526316		3	0.0517241	1	0.047619		Reminder
	Collecting data for research	6	0.0759494		0	0	3	0.0810811	3	0.0789474		6	0.103448	0	0		Research
	County of origin
	Germany	6	0.0759494		0	0	1	0.027027	5	0.131579		1	0.0172414	5	0.238095
	Ireland	3	0.0379747		0	0	2	0.0540541	1	0.0263158		2	0.0344828	1	0.047619
	Netherlands	1	0.0126582		1	0.25	0	0	0	0		1	0.0172414	0	0
	United Kingdom	71	0.898734		3	0.75	23	0.621622	45	1.18421		52	0.896552	19	0.904762
	United States	36	0.455696		0	0	11	0.297297	25	0.657895		32	0.551724	4	0.190476
	Policies
	In-app privacy policy	22	0.278481		1	0.25	8	0.216216	13	0.342105		21	0.362069	1	0.047619
	Other privacy policy	48	0.607595		3	0.75	21	0.567568	24	0.631579		40	0.689655	8	0.380952
	No privacy policy	26	0.329114		1	0.25	14	0.378378	11	0.289474		14	0.241379	12	0.571429
	Advertising policy	3	0.0379747		0	0	0	0	3	0.0789474		1	0.0172414	2	0.0952381
	Clinical disclaimer	36	0.455696		1	0.25	16	0.432432	19	0.5		23	0.396552	13	0.619048

## Sheet: Table - Collection
	{Table}
	Collection
	n collecting data	70			4		35		31			51		19
		Apps that collect data
					By platform							By payment model
		All (n=70)			Android-only (n=4)		iOS-only (n=35)		Multi-platform (n=31)			Free (n=51)		Paid (n=19)
	Classes of collected data	n	(%)		n	(%)	n	(%)	n	(%)		n	(%)	n	(%)
	Identifying information	56	0.8		4	1	28	0.8	24	0.774194		40	0.784314	16	0.842105
	Identifying information (strong)	46	0.657143		2	0.5	24	0.685714	20	0.645161		32	0.627451	14	0.736842
	Identifying information (weaker)	34	0.485714		3	0.75	17	0.485714	14	0.451613		27	0.529412	7	0.368421
	Sensitive information	40	0.571429		2	0.5	24	0.685714	14	0.451613		26	0.509804	14	0.736842
	Sensitive information (medical)	33	0.471429		1	0.25	21	0.6	11	0.354839		20	0.392157	13	0.684211
	Sensitive information (measurements)	25	0.357143		2	0.5	16	0.457143	7	0.225806		15	0.294118	10	0.526316
	Sensitive information (other)	5	0.0714286		1	0.25	1	0.0285714	3	0.0967742		3	0.0588235	2	0.105263
	Other information	58	0.828571		1	0.25	31	0.885714	26	0.83871		43	0.843137	15	0.789474
	Protocol-standard data	0	0		0	0	0	0	0	0		0	0	0	0
	Analytics data	0	0		0	0	0	0	0	0		0	0	0	0
	n transmitting data	70			4		35		31			51		19
		Apps that collect data
					By platform							By payment model
		All (n=70)			Android-only (n=4)		iOS-only (n=35)		Multi-platform (n=31)			Free (n=51)		Paid (n=19)
	Policy and collection concordance	n	(%)		n	(%)	n	(%)	n	(%)		n	(%)	n	(%)
	App has privacy policy	50	0.714286		3	0.75	22	0.628571	25	0.806452		42	0.823529	8	0.421053
	Collects data not covered by policy	41	0.585714		2	0.5	22	0.628571	17	0.548387		35	0.686275	6	0.315789
	Identifying information	32	0.457143		2	0.5	16	0.457143	14	0.451613		26	0.509804	6	0.315789
	Identifying information (strong)	21	0.3		2	0.5	12	0.342857	7	0.225806		16	0.313725	5	0.263158
	Identifying information (weaker)	23	0.328571		1	0.25	11	0.314286	11	0.354839		18	0.352941	5	0.263158
	Sensitive information	26	0.371429		1	0.25	13	0.371429	12	0.387097		20	0.392157	6	0.315789
	Sensitive information (medical)	22	0.314286		0	0	12	0.342857	10	0.322581		16	0.313725	6	0.315789
	Sensitive information (measurements)	14	0.2		1	0.25	9	0.257143	4	0.129032		9	0.176471	5	0.263158
	Sensitive information (other)	4	0.0571429		0	0	1	0.0285714	3	0.0967742		3	0.0588235	1	0.0526316
	Other information	20	0.285714		1	0.25	14	0.4	5	0.16129		15	0.294118	5	0.263158
	No collection explicitly contradicts policy	8	0.114286		1	0.25	0	0	7	0.225806		6	0.117647	2	0.105263
	Policy covers data not collected by app	42	0.6		3	0.75	18	0.514286	21	0.677419		35	0.686275	7	0.368421
	Identifying information	42	0.6		3	0.75	18	0.514286	21	0.677419		35	0.686275	7	0.368421
	Identifying information (strong)	42	0.6		3	0.75	18	0.514286	21	0.677419		35	0.686275	7	0.368421
	Identifying information (weaker)	23	0.328571		1	0.25	10	0.285714	12	0.387097		20	0.392157	3	0.157895
	Sensitive information	9	0.128571		0	0	4	0.114286	5	0.16129		7	0.137255	2	0.105263
	Sensitive information (medical)	5	0.0714286		0	0	2	0.0571429	3	0.0967742		5	0.0980392	0	0
	Sensitive information (measurements)	2	0.0285714		0	0	0	0	2	0.0645161		0	0	2	0.105263
	Sensitive information (other)	2	0.0285714		0	0	2	0.0571429	0	0		2	0.0392157	0	0
	Other information	13	0.185714		2	0.5	4	0.114286	7	0.225806		13	0.254902	0	0
	App has no privacy policy	20	0.285714		1	0.25	13	0.371429	6	0.193548		9	0.176471	11	0.578947
	Identifying information	15	0.214286		1	0.25	10	0.285714	4	0.129032		7	0.137255	8	0.421053
	Identifying information (strong)	11	0.157143		0	0	8	0.228571	3	0.0967742		4	0.0784314	7	0.368421
	Identifying information (weaker)	7	0.1		1	0.25	4	0.114286	2	0.0645161		5	0.0980392	2	0.105263
	Sensitive information	12	0.171429		1	0.25	9	0.257143	2	0.0645161		4	0.0784314	8	0.421053
	Sensitive information (medical)	10	0.142857		1	0.25	8	0.228571	1	0.0322581		3	0.0588235	7	0.368421
	Sensitive information (measurements)	8	0.114286		1	0.25	5	0.142857	2	0.0645161		3	0.0588235	5	0.263158
	Sensitive information (other)	1	0.0142857		1	0.25	0	0	0	0		0	0	1	0.0526316
	Other information	16	0.228571		0	0	12	0.342857	4	0.129032		8	0.156863	8	0.421053
	n collecting data	70			4		35		31			51		19
		Apps that transmit data
					By platform							By payment model
		All (n=70)			Android-only (n=4)		iOS-only (n=35)		Multi-platform (n=31)			Free (n=51)		Paid (n=19)
	Transmitted data item	n	(%)		n	(%)	n	(%)	n	(%)		n	(%)	n	(%)
	Identifying information (strong)	46	0.657143		2	0.5	24	0.685714	20	0.645161		32	0.627451	14	0.736842
	Date of birth	12	0.171429		1	0.25	8	0.228571	3	0.0967742		9	0.176471	3	0.157895
	Email address	22	0.314286		0	0	10	0.285714	12	0.387097		17	0.333333	5	0.263158
	Financial/payment details	2	0.0285714		0	0	0	0	2	0.0645161		1	0.0196078	1	0.0526316
	Full name	16	0.228571		1	0.25	11	0.314286	4	0.129032		12	0.235294	4	0.210526
	Full postcode	11	0.157143		0	0	5	0.142857	6	0.193548		11	0.215686	0	0
	Medical system numbers	7	0.1		0	0	6	0.171429	1	0.0322581		3	0.0588235	4	0.210526
	Others' contact details	3	0.0428571		2	0.5	0	0	1	0.0322581		3	0.0588235	0	0
	Others email addresses	3	0.0428571		1	0.25	2	0.0571429	0	0		3	0.0588235	0	0
	Password	21	0.3		1	0.25	13	0.371429	7	0.225806		16	0.313725	5	0.263158
	Photographs of people	8	0.114286		1	0.25	5	0.142857	2	0.0645161		3	0.0588235	5	0.263158
	Postal address	7	0.1		0	0	3	0.0857143	4	0.129032		7	0.137255	0	0
	Social network credentials	4	0.0571429		0	0	2	0.0571429	2	0.0645161		3	0.0588235	1	0.0526316
	Social security number	0	0		0	0	0	0	0	0		0	0	0	0
	Telephone numbers	6	0.0857143		0	0	3	0.0857143	3	0.0967742		6	0.117647	0	0
	Username	10	0.142857		1	0.25	7	0.2	2	0.0645161		5	0.0980392	5	0.263158
	Identifying information (weaker)	34	0.485714		3	0.75	17	0.485714	14	0.451613		27	0.529412	7	0.368421
	Age or year of birth	11	0.157143		1	0.25	2	0.0571429	8	0.258065		8	0.156863	3	0.157895
	Country or area or partial postcode	14	0.2		1	0.25	8	0.228571	5	0.16129		11	0.215686	3	0.157895
	Gender	18	0.257143		2	0.5	8	0.228571	8	0.258065		15	0.294118	3	0.157895
	Geolocation	6	0.0857143		1	0.25	2	0.0571429	3	0.0967742		6	0.117647	0	0
	Name (first or unspecified)	3	0.0428571		1	0.25	0	0	2	0.0645161		3	0.0588235	0	0
	Sensitive Information (Medical)	33	0.471429		1	0.25	21	0.6	11	0.354839		20	0.392157	13	0.684211
	Disability status	0	0		0	0	0	0	0	0		0	0	0	0
	Genetic information	0	0		0	0	0	0	0	0		0	0	0	0
	HIV status	0	0		0	0	0	0	0	0		0	0	0	0
	IVF information	0	0		0	0	0	0	0	0		0	0	0	0
	Medical history	22	0.314286		1	0.25	13	0.371429	8	0.258065		11	0.215686	11	0.578947
	Medications	12	0.171429		1	0.25	6	0.171429	5	0.16129		9	0.176471	3	0.157895
	Mental health status	3	0.0428571		0	0	1	0.0285714	2	0.0645161		3	0.0588235	0	0
	Substance use	13	0.185714		1	0.25	7	0.2	5	0.16129		9	0.176471	4	0.210526
	Sensitive Information (Measurements)	25	0.357143		2	0.5	16	0.457143	7	0.225806		15	0.294118	10	0.526316
	Sensitive Information (Other)	5	0.0714286		1	0.25	1	0.0285714	3	0.0967742		3	0.0588235	2	0.105263
	Employment status	2	0.0285714		0	0	1	0.0285714	1	0.0322581		2	0.0392157	0	0
	Ethnicity	3	0.0428571		1	0.25	0	0	2	0.0645161		1	0.0196078	2	0.105263
	Political affiliation	0	0		0	0	0	0	0	0		0	0	0	0
	Religious beliefs	0	0		0	0	0	0	0	0		0	0	0	0
	Sexuality	1	0.0142857		0	0	0	0	1	0.0322581		1	0.0196078	0	0
	Other information	58	0.828571		1	0.25	31	0.885714	26	0.83871		43	0.843137	15	0.789474
	Hobbies and interests	1	0.0142857		0	0	1	0.0285714	0	0		1	0.0196078	0	0
	Other photographs	4	0.0571429		1	0.25	1	0.0285714	2	0.0645161		4	0.0784314	0	0
	User generated content not previously covered	58	0.828571		1	0.25	31	0.885714	26	0.83871		43	0.843137	15	0.789474
	Annotations	14	0.2		0	0	9	0.257143	5	0.16129		11	0.215686	3	0.157895
	Appointments	10	0.142857		0	0	9	0.257143	1	0.0322581		3	0.0588235	7	0.368421
	Bookmarks	11	0.157143		0	0	4	0.114286	7	0.225806		11	0.215686	0	0
	Feedback/Rating	12	0.171429		0	0	3	0.0857143	9	0.290323		12	0.235294	0	0
	Messages	5	0.0714286		1	0.25	3	0.0857143	1	0.0322581		5	0.0980392	0	0
	Reminders	13	0.185714		0	0	8	0.228571	5	0.16129		11	0.215686	2	0.105263
	Diary	4	0.0571429		0	0	2	0.0571429	2	0.0645161		2	0.0392157	2	0.105263

## Sheet: Table - Data Storage
	{Table}
	Data storage
	n	79			4		37		38			58		21
					By platform							By payment model
		All (n=79)			Android-only (n=4)		iOS-only (n=37)		Multi-platform (n=38)			Free (n=58)		Paid (n=21)
	Data storage behaviour	n	%		n	%	n	%	n	%		n	%	n	%
	App stores data locally	75	0.949367		2	0.5	37	1	36	0.947368		56	0.965517	19	0.904762
	Data store is encrypted	0	0		0	0	0	0	0	0		0	0	0	0
	Data store contains personal/sensitive information	42	0.531646		0	0	23	0.621622	19	0.5		30	0.517241	12	0.571429
	App does not store local data	4	0.0506329		2	0.5	0	0	2	0.0526316		2	0.0344828	2	0.0952381

## Sheet: Table - Data Type Summary
	{Table}
	Transmission
	n	53		50		49
		Apps with privacy policies (n=53)
		Covered in policy		Collected by app (n=50)		Transmitted by app (n=49)		Using encryption a
	Data type	n	(%)	n	(%)	n	(%)	n	(%)
	Personal information	39	0.735849	38	0.76	40	0.816327	32	0.8		Identifying Information
	Strong personal identifiers	38	0.716981	32	0.64	28	0.571429	27	0.964286		Identifying Information (Strong)
	Weaker personal identifiers	24	0.45283	26	0.52	38	0.77551	31	0.815789		Identifying Information (Weaker)
	Sensitive information	13	0.245283	25	0.5	10	0.204082	10	1		Sensitive Information
	Health-related information	11	0.207547	24	0.48	7	0.142857	7	1		Health Information
	Personal measurements	4	0.0754717	15	0.3	2	0.0408163	2	1		Sensitive Information (Measurements)
	Medical history	7	0.132075	21	0.42	5	0.102041	5	1		Sensitive Information (Medical)
	Other sensitive information	2	0.0377358	4	0.08	5	0.102041	5	1		Sensitive Information (Other)
	Other user-generated data	32	0.603774	39	0.78	19	0.387755	18	0.947368		Other Information
	Analytics data	34	0.641509	34	0.68	34	0.693878	31	0.911765		Analytics Data
	Protocol-standard data c	22	0.415094	- b		49	1	37	0.755102		Protocol-Standard Data
	n	26		20		21
		Apps without privacy policies (n=26)
		Covered in policy		Collected by app (n=20)		Transmitted by app (n=21)		Using encryption a
	Data type	n	(%)	n	(%)	n	(%)	n	(%)
	Personal information	-		13	0.26	16	0.326531	15	0.9375		Identifying Information
	Strong personal identifiers	-		9	0.18	7	0.142857	7	1		Identifying Information (Strong)
	Weaker personal identifiers	-		7	0.14	16	0.326531	15	0.9375		Identifying Information (Weaker)
	Sensitive information	-		8	0.16	2	0.0408163	2	1		Sensitive Information
	Health-related information	-		8	0.16	2	0.0408163	2	1		Health Information
	Personal measurements	-		5	0.1	2	0.0408163	2	1		Sensitive Information (Measurements)
	Medical history	-		6	0.12	0	0	0	-		Sensitive Information (Medical)
	Other sensitive information	-		1	0.02	0	0	0	-		Sensitive Information (Other)
	Other user-generated data	-		11	0.22	5	0.102041	5	1		Other Information
	Analytics data	-		16	0.32	16	0.326531	16	1		Analytics Data
	Protocol-standard data c	-		- b		21	0.428571	18	0.857143		Protocol-Standard Data

## Sheet: Table - Transmission 1
§
	{Table}
	Transmission
	n	79							4		37		38			58		21
									By platform							By payment model
		All (n=79)							Android-only (n=4)		iOS-only (n=37)		Multi-platform (n=38)			Free (n=58)		Paid (n=21)
	Transmission destination	n	%	% of any online	Outside UK	(%)	% of dest n		n	%	n	%	n	%		n	%	n	%
	Any online service	70	0.886076		51	0.64557	0.728571		3	0.75	29	0.783784	38	1		54	0.931034	16	0.761905
	Developer-controlled services	23	0.291139	0.328571	7	0.0886076	0.304348		2	0.5	8	0.216216	13	0.342105		21	0.362069	2	0.0952381
	Loading content	12	0.151899	0.171429	4	0.0506329	0.333333		2	0.5	5	0.135135	5	0.131579		12	0.206897	0	0
	Cloud-hosted data	7	0.0886076	0.1	2	0.0253165	0.285714		1	0.25	4	0.108108	2	0.0526316		7	0.12069	0	0
	Crowd-sourced feedback	5	0.0632911	0.0714286	2	0.0253165	0.4		0	0	1	0.027027	4	0.105263		3	0.0517241	2	0.0952381
	Research	5	0.0632911	0.0714286	1	0.0126582	0.2		0	0	2	0.0540541	3	0.0789474		5	0.0862069	0	0
	Third parties	63	0.797468	0.9	50	0.632911	0.793651		2	0.5	25	0.675676	36	0.947368		47	0.810345	16	0.761905
	Loading content	53	0.670886	0.757143	17	0.21519	0.320755		2	0.5	18	0.486486	33	0.868421		41	0.706897	12	0.571429
	Cloud-hosted data	2	0.0253165	0.0285714	1	0.0126582	0.5		0	0	0	0	2	0.0526316		1	0.0172414	1	0.047619
	Crowd-sourced feedback	1	0.0126582	0.0142857	0	0	0		0	0	1	0.027027	0	0		1	0.0172414	0	0
	Marketing or advertising	14	0.177215	0.2	9	0.113924	0.642857		1	0.25	5	0.135135	8	0.210526		12	0.206897	2	0.0952381
	Analytics	43	0.544304	0.614286	42	0.531646	0.976744		0	0	15	0.405405	28	0.736842		32	0.551724	11	0.52381
	Research	1	0.0126582	0.0142857	1	0.0126582	1		0	0	1	0.027027	0	0		1	0.0172414	0	0
	No data transmission	9	0.113924		-				1	0.25	8	0.216216	0	0		4	0.0689655	5	0.238095

## Sheet: Tables - Transmission 2
	{Table}
	Transmission
	n	79			4		37		38			58		21
					By platform							By payment model
		All (n=79)			Android-only (n=4)		iOS-only (n=37)		Multi-platform (n=38)			Free (n=58)		Paid (n=21)
	Transmission behaviour	n	(%)		n	(%)	n	(%)	n	(%)		n	(%)	n	(%)
	App transmits data	70	0.886076		3	0.75	29	0.783784	38	1		54	0.931034	16	0.761905
	Online services	27	0.341772		2	0.5	10	0.27027	15	0.394737		24	0.413793	3	0.142857
	Advertising/marketing	14	0.177215		1	0.25	5	0.135135	8	0.210526		12	0.206897	2	0.0952381
	Analytics	43	0.544304		0	0	15	0.405405	28	0.736842		32	0.551724	11	0.52381
	Content loading	61	0.772152		3	0.75	21	0.567568	37	0.973684		41	0.706897	12	0.571429
	App doesn't transmit data	9	0.113924		1	0.25	8	0.216216	0	0		4	0.0689655	5	0.238095
	n transmitting data	70			3		29		38			54		16
		Apps that transmit data
					By platform							By payment model
		All (n=70)			Android-only (n=3)		iOS-only (n=29)		Multi-platform (n=38)			Free (n=54)		Paid (n=16)
	Classes of transmitted data	n	(%)		n	(%)	n	(%)	n	(%)		n	(%)	n	(%)
	Identifying information	56	0.8		2	0.666667	24	0.827586	30	0.789474		45	0.833333	11	0.6875
	Identifying information (strong)	35	0.5		1	0.333333	12	0.413793	22	0.578947		28	0.518519	7	0.4375
	Identifying information (weaker)	54	0.771429		2	0.666667	24	0.827586	28	0.736842		43	0.796296	11	0.6875
	Sensitive information	12	0.171429		0	0	6	0.206897	6	0.157895		11	0.203704	1	0.0625
	Sensitive information (medical)	5	0.0714286		0	0	2	0.0689655	3	0.0789474		5	0.0925926	0	0
	Sensitive information (measurements)	4	0.0571429		0	0	2	0.0689655	2	0.0526316		3	0.0555556	1	0.0625
	Sensitive information (other)	5	0.0714286		0	0	3	0.103448	2	0.0526316		5	0.0925926	0	0
	Other information	24	0.342857		0	0	7	0.241379	17	0.447368		21	0.388889	3	0.1875
	Protocol-standard data	70	1		3	1	29	1	38	1		54	1	16	1
	Analytics data	50	0.714286		0	0	18	0.62069	32	0.842105		39	0.722222	11	0.6875
	n transmitting data	70			3		29		38			54		16
		Apps that transmit data
					By platform							By payment model
		All (n=70)			Android-only (n=3)		iOS-only (n=29)		Multi-platform (n=38)			Free (n=54)		Paid (n=16)
	Policy and transmission concordance	n	(%)		n	(%)	n	(%)	n	(%)		n	(%)	n	(%)
	App has privacy policy	49	0.7		2	0.666667	20	0.689655	27	0.710526		42	0.777778	7	0.4375
	Policy covers data not transmitted by app	41	0.585714		2	0.666667	15	0.517241	24	0.631579		37	0.685185	4	0.25
	No transmission explicitly contradicting policy	11	0.157143		0	0	4	0.137931	7	0.184211		6	0.111111	5	0.3125
	Transmits data not covered by policy	38	0.542857		2	0.666667	16	0.551724	20	0.526316		36	0.666667	2	0.125
	Identifying information	35	0.5		2	0.666667	14	0.482759	19	0.5		33	0.611111	2	0.125
	Identifying information (strong)	23	0.328571		1	0.333333	8	0.275862	14	0.368421		21	0.388889	2	0.125
	Identifying information (weaker)	29	0.414286		2	0.666667	12	0.413793	15	0.394737		27	0.5	2	0.125
	Sensitive information	6	0.0857143		0	0	3	0.103448	3	0.0789474		6	0.111111	0	0
	Sensitive information (medical)	4	0.0571429		0	0	2	0.0689655	2	0.0526316		4	0.0740741	0	0
	Sensitive information (measurements)	0	0		0	0	0	0	0	0		0	0	0	0
	Sensitive information (other)	4	0.0571429		0	0	2	0.0689655	2	0.0526316		4	0.0740741	0	0
	Other information	7	0.1		0	0	4	0.137931	3	0.0789474		7	0.12963	0	0
	Protocol-standard data	0	0		0	0	0	0	0	0		0	0	0	0
	Analytics data	12	0.171429		0	0	5	0.172414	7	0.184211		12	0.222222	0	0
	Transmits data explicitly disclaimed by policy	0	0		0	0	0	0	0	0		0	0	0	0
	App has no privacy policy	21	0.3		1	0.333333	9	0.310345	11	0.289474		12	0.222222	9	0.5625
	Identifying information	15	0.214286		0	0	9	0.310345	6	0.157895		8	0.148148	7	0.4375
	Identifying information (strong)	7	0.1		0	0	4	0.137931	3	0.0789474		4	0.0740741	3	0.1875
	Identifying information (weaker)	13	0.185714		0	0	8	0.275862	5	0.131579		7	0.12963	6	0.375
	Sensitive information	2	0.0285714		0	0	1	0.0344828	1	0.0263158		1	0.0185185	1	0.0625
	Sensitive information (medical)	0	0		0	0	0	0	0	0		0	0	0	0
	Sensitive information (measurements)	2	0.0285714		0	0	1	0.0344828	1	0.0263158		1	0.0185185	1	0.0625
	Sensitive information (other)	0	0		0	0	0	0	0	0		0	0	0	0
	Other information	5	0.0714286		0	0	2	0.0689655	3	0.0789474		4	0.0740741	1	0.0625
	Protocol-standard data	0	0		0	0	0	0	0	0		0	0	0	0
	Analytics data	16	0.228571		0	0	7	0.241379	9	0.236842		9	0.166667	7	0.4375
	n transmitting data	70			3		29		38			54		16
		Apps that transmit data
					By platform							By payment model
		All (n=70)			Android-only (n=3)		iOS-only (n=29)		Multi-platform (n=38)			Free (n=54)		Paid (n=16)
	Transmission security	n	(%)		n	(%)	n	(%)	n	(%)		n	(%)	n	(%)
	App transmits data some/all data securely (HTTPS)	70	1		3	1	29	1	38	1		54	1	16	1
	All transmissions encrypted	54	0.771429		3	1	23	0.793103	28	0.736842		41	0.759259	13	0.8125
	App transmits some/all data insecurely (HTTP)	16	0.228571		0	0	6	0.206897	10	0.263158		13	0.240741	3	0.1875
	All transmission unencrypted	0	0		0	0	0	0	0	0		0	0	0	0
	Identifying information	9	0.128571		0	0	4	0.137931	5	0.131579		8	0.148148	1	0.0625
	Identifying information (strong)	1	0.0142857		0	0	0	0	1	0.0263158		1	0.0185185	0	0
	Identifying information (weaker)	8	0.114286		0	0	4	0.137931	4	0.105263		7	0.12963	1	0.0625
	Sensitive information	0	0		0	0	0	0	0	0		0	0	0	0
	Sensitive information (medical)	0	0		0	0	0	0	0	0		0	0	0	0
	Sensitive information (measurements)	0	0		0	0	0	0	0	0		0	0	0	0
	Sensitive information (other)	0	0		0	0	0	0	0	0		0	0	0	0
	Other information	1	0.0142857		0	0	0	0	1	0.0263158		1	0.0185185	0	0
	Protocol-standard data	15	0.214286		0	0	6	0.206897	9	0.236842		12	0.222222	3	0.1875
	Analytics data	3	0.0428571		0	0	1	0.0344828	2	0.0526316		3	0.0555556	0	0
	n transmitting data	70			3		29		38			54		16
		Apps that transmit data
					By platform							By payment model
		All (n=70)			Android-only (n=3)		iOS-only (n=29)		Multi-platform (n=38)			Free (n=54)		Paid (n=16)
	Transmitted data item	n	(%)		n	(%)	n	(%)	n	(%)		n	(%)	n	(%)
	Identifying information (strong)	35	0.5		1	0.333333	12	0.413793	22	0.578947		28	0.518519	7	0.4375
	Date of birth	6	0.0857143		1	0.333333	2	0.0689655	3	0.0789474		6	0.111111	0	0
	Device unique identifier	11	0.157143		0	0	7	0.241379	4	0.105263		7	0.12963	4	0.25
	Email address	14	0.2		1	0.333333	4	0.137931	9	0.236842		12	0.222222	2	0.125
	Financial/payment details	0	0		0	0	0	0	0	0		0	0	0	0
	Full name	8	0.114286		1	0.333333	4	0.137931	3	0.0789474		8	0.148148	0	0
	Full postcode	6	0.0857143		1	0.333333	2	0.0689655	3	0.0789474		6	0.111111	0	0
	Medical system numbers	1	0.0142857		0	0	0	0	1	0.0263158		1	0.0185185	0	0
	Others' contact details	0	0		0	0	0	0	0	0		0	0	0	0
	Others email addresses	1	0.0142857		0	0	1	0.0344828	0	0		1	0.0185185	0	0
	Password	11	0.157143		1	0.333333	5	0.172414	5	0.131579		8	0.148148	3	0.1875
	Photographs of people	2	0.0285714		0	0	2	0.0689655	0	0		2	0.037037	0	0
	Postal address	2	0.0285714		0	0	0	0	2	0.0526316		2	0.037037	0	0
	Social network credentials	0	0		0	0	0	0	0	0		0	0	0	0
	Social security number	0	0		0	0	0	0	0	0		0	0	0	0
	Telephone numbers	2	0.0285714		0	0	0	0	2	0.0526316		2	0.037037	0	0
	Username	6	0.0857143		1	0.333333	2	0.0689655	3	0.0789474		5	0.0925926	1	0.0625
	Identifying information (weaker)	54	0.771429		2	0.666667	24	0.827586	28	0.736842		43	0.796296	11	0.6875
	Age or year of birth	6	0.0857143		0	0	2	0.0689655	4	0.105263		6	0.111111	0	0
	Country or area or partial postcode	37	0.528571		1	0.333333	18	0.62069	18	0.473684		28	0.518519	9	0.5625
	Gender	11	0.157143		1	0.333333	4	0.137931	6	0.157895		11	0.203704	0	0
	Geolocation	7	0.1		1	0.333333	3	0.103448	3	0.0789474		6	0.111111	1	0.0625
	Name (first or unspecified)	2	0.0285714		0	0	1	0.0344828	1	0.0263158		2	0.037037	0	0
	Other unique identifier	38	0.542857		2	0.666667	19	0.655172	17	0.447368		29	0.537037	9	0.5625
	Sensitive Information (Medical)	5	0.0714286		0	0	2	0.0689655	3	0.0789474		5	0.0925926	0	0
	Disability status	0	0		0	0	0	0	0	0		0	0	0	0
	Genetic information	0	0		0	0	0	0	0	0		0	0	0	0
	HIV status	0	0		0	0	0	0	0	0		0	0	0	0
	IVF information	0	0		0	0	0	0	0	0		0	0	0	0
	Medical history	1	0.0142857		0	0	0	0	1	0.0263158		1	0.0185185	0	0
	Medications	2	0.0285714		0	0	0	0	2	0.0526316		2	0.037037	0	0
	Mental health status	1	0.0142857		0	0	0	0	1	0.0263158		1	0.0185185	0	0
	Substance use	2	0.0285714		0	0	2	0.0689655	0	0		2	0.037037	0	0
	Sensitive Information (Measurements)	4	0.0571429		0	0	2	0.0689655	2	0.0526316		3	0.0555556	1	0.0625
	Sensitive Information (Other)	5	0.0714286		0	0	3	0.103448	2	0.0526316		5	0.0925926	0	0
	Employment status	4	0.0571429		0	0	3	0.103448	1	0.0263158		4	0.0740741	0	0
	Ethnicity	1	0.0142857		0	0	0	0	1	0.0263158		1	0.0185185	0	0
	Political affiliation	0	0		0	0	0	0	0	0		0	0	0	0
	Religious beliefs	0	0		0	0	0	0	0	0		0	0	0	0
	Sexuality	1	0.0142857		0	0	0	0	1	0.0263158		1	0.0185185	0	0
	Other information	24	0.342857		0	0	7	0.241379	17	0.447368		21	0.388889	3	0.1875
	Hobbies and interests	1	0.0142857		0	0	1	0.0344828	0	0		1	0.0185185	0	0
	Other photographs	0	0		0	0	0	0	0	0		0	0	0	0
	User generated content not previously covered	16	0.228571		0	0	6	0.206897	10	0.263158		15	0.277778	1	0.0625
	Protocol-standard data	70	1		3	1	29	1	38	1		54	1	16	1
	Device characteristics	69	0.985714		3	1	29	1	37	0.973684		54	1	15	0.9375
	IP address	69	0.985714		3	1	29	1	37	0.973684		54	1	15	0.9375
	Analytics data	50	0.714286		0	0	18	0.62069	32	0.842105		39	0.722222	11	0.6875

## Sheet: Table - Policies 1
	{Table}
	Policies
	n		79			70		59			70		38			4		37		38			58		21
						Apps that collect data					Apps that transmit data					By platform							By payment model
			All (n=79)			Any data (n=70)		Personal or sensitive data (n=59)			Any data (n=70)		Personal or sensitive data (n=38)			Android-only (n=4)		iOS-only (n=37)		Multi-platform (n=38)			Free (n=58)		Paid (n=21)
	Domain		n	(%)		n	(%)	n	(%)		n	(%)	n	(%)		n	(%)	n	(%)	n	(%)		n	(%)	n	(%)
	Privacy disclosure available		53	0.670886		50	0.714286	43	0.728814		49	0.7	31	0.815789		3	0.75	23	0.621622	27	0.710526		44	0.758621	9	0.428571
	In-app privacy policy		22	0.278481		22	0.314286	21	0.355932		22	0.314286	15	0.394737		1	0.25	8	0.216216	13	0.342105		21	0.362069	1	0.047619
	Advertising policy		3	0.0379747		3	0.0428571	3	0.0508475		3	0.0428571	3	0.0789474		0	0	0	0	3	0.0789474		1	0.0172414	2	0.0952381
	Other privacy policy		48	0.607595		45	0.642857	38	0.644068		44	0.628571	29	0.763158		3	0.75	21	0.567568	24	0.631579		40	0.689655	8	0.380952
	Policy mentions app		8	0.101266		8	0.114286	5	0.0847458		8	0.114286	5	0.131579		1	0.25	2	0.0540541	5	0.131579		6	0.103448	2	0.0952381
	No privacy disclosure		26	0.329114		20	0.285714	16	0.271186		21	0.3	7	0.184211		1	0.25	14	0.378378	11	0.289474		14	0.241379	12	0.571429
	In-app clinical disclaimer		36	0.455696		32	0.457143	26	0.440678		33	0.471429	13	0.342105		1	0.25	16	0.432432	19	0.5		23	0.396552	13	0.619048
	Policy mentions app regardless		28	0.35443		28	0.4	25	0.423729		28	0.4	19	0.5
													7	0.2

## Sheet: Tables - Policies 2
	{Table}
	Policies
	n apps with policy		53			50		43			49		31			3		23		27			44		9
			Apps with policy
						Apps that collect data					Apps that transmit data					By platform							By payment model
			All (n=53)			Any data (n=50)		Personal or sensitive data (n=43)			Any data (n=49)		Personal or sensitive data (n=31)			Android-only (n=3)		iOS-only (n=23)		Multi-platform (n=27)			Free (n=44)		Paid (n=9)
	Domain	Topic	n	(%)		n	(%)	n	(%)		n	(%)	n	(%)		n	(%)	n	(%)	n	(%)		n	(%)	n	(%)
	Uses of data	Primary uses of collected data	46	0.867925		43	0.86	36	0.837209		43	0.877551	28	0.903226		3	1	20	0.869565	23	0.851852		39	0.886364	7	0.777778			Primary uses of collected data
		Secondary uses of collected data	31	0.584906		29	0.58	25	0.581395		30	0.612245	20	0.645161		3	1	9	0.391304	19	0.703704		27	0.613636	4	0.444444			Secondary uses of collected data
		Sending data to developer-provided online services	21	0.396226		21	0.42	18	0.418605		21	0.428571	17	0.548387		2	0.666667	7	0.304348	12	0.444444		19	0.431818	2	0.222222			Sending data while loading content
		Sending data to advertisers/marketers	6	0.113208		6	0.12	6	0.139535		6	0.122449	6	0.193548		1	0.333333	2	0.0869565	3	0.111111		6	0.136364	0	0			Sending data to developer-provided online services
		Sending data for analytics/research	19	0.358491		18	0.36	14	0.325581		19	0.387755	16	0.516129		0	0	5	0.217391	14	0.518519		15	0.340909	4	0.444444			Sending data to advertisers/marketers
		Sending data while loading content	5	0.0943396		5	0.1	4	0.0930233		5	0.102041	3	0.0967742		1	0.333333	2	0.0869565	2	0.0740741		3	0.0681818	2	0.222222			Sending data for anlaytics/research
		Anonymous uses only	8	0.150943		7	0.14	7	0.162791		8	0.163265	4	0.129032		0	0	4	0.173913	4	0.148148		8	0.181818	0	0			Anonymous data
	Technical concerns	Technical and procedural security arrangements	28	0.528302		26	0.52	22	0.511628		27	0.55102	15	0.483871		2	0.666667	13	0.565217	13	0.481481		23	0.522727	5	0.555556			Technical and procedural security arrangements
		How long data will be retained	9	0.169811		9	0.18	7	0.162791		9	0.183673	6	0.193548		1	0.333333	4	0.173913	4	0.148148		9	0.204545	0	0			How long data will be retained
		Inherent risks or limitations of security on mobile device/internet	19	0.358491		18	0.36	14	0.325581		19	0.387755	11	0.354839		2	0.666667	7	0.304348	10	0.37037		16	0.363636	3	0.333333			Inherent risks or limitations of security on mobile device/internet
		The use of cookies	42	0.792453		39	0.78	33	0.767442		38	0.77551	25	0.806452		3	1	19	0.826087	20	0.740741		34	0.772727	8	0.888889			The use of cookies
	User rights	Procedures for opting out of data sharing a	30	0.566038		28	0.56	25	0.581395		30	0.612245	19	0.612903		1	0.333333	11	0.478261	18	0.666667		27	0.613636	3	0.333333			Procedures for opting out of data sharing
		Consequences of not providing or sharing data a	15	0.283019		15	0.3	13	0.302326		15	0.306122	8	0.258065		1	0.333333	10	0.434783	4	0.148148		14	0.318182	1	0.111111			Consequences of not providing or sharing data
		Procedures for subject access requests a	14	0.264151		14	0.28	10	0.232558		14	0.285714	9	0.290323		1	0.333333	4	0.173913	9	0.333333		14	0.318182	0	0			Procedures for subject access requests
		Procedures for editing data held by developers/third parties a	29	0.54717		27	0.54	23	0.534884		29	0.591837	17	0.548387		2	0.666667	9	0.391304	18	0.666667		25	0.568182	4	0.444444			Procedures for editing data held by developers/third parties
		Procedures for deleting data held by developers/third parties a	15	0.283019		14	0.28	14	0.325581		15	0.306122	10	0.322581		0	0	8	0.347826	7	0.259259		12	0.272727	3	0.333333			Procedures for deleting data held by developers/third parties
		Complaints procedures	28	0.528302		27	0.54	24	0.55814		28	0.571429	17	0.548387		2	0.666667	9	0.391304	17	0.62963		24	0.545455	4	0.444444			Complaints procedures
		Special procedures for handling data for vulnerable users	9	0.169811		9	0.18	8	0.186047		9	0.183673	6	0.193548		2	0.666667	3	0.130435	4	0.148148		7	0.159091	2	0.222222			Special procedures for handling data for vulnerable users
	Administrative details	Identify of data controller or responsible legal entity	16	0.301887		16	0.32	14	0.325581		16	0.326531	10	0.322581		0	0	6	0.26087	10	0.37037		13	0.295455	3	0.333333			Identify of data controller or responsible legal entity
		Legal jurisdiction governing policy	27	0.509434		26	0.52	23	0.534884		26	0.530612	17	0.548387		0	0	16	0.695652	11	0.407407		23	0.522727	4	0.444444			Legal jurisdiction governing policy
		Jurisdictions under which data will be processed a	13	0.245283		13	0.26	11	0.255814		13	0.265306	8	0.258065		1	0.333333	7	0.304348	5	0.185185		11	0.25	2	0.222222			Jurisdictions under which data will be processed
		Date of policy	8	0.150943		7	0.14	5	0.116279		8	0.163265	3	0.0967742		1	0.333333	4	0.173913	3	0.111111		4	0.0909091	4	0.444444			Date of policy
		Date of next review	0	0		0	0	0	0		0	0	0	0		0	0	0	0	0	0		0	0	0	0			Date of next review
		Procedures for changing the terms of the policy	17	0.320755		17	0.34	14	0.325581		17	0.346939	11	0.354839		2	0.666667	6	0.26087	9	0.333333		16	0.363636	1	0.111111			Procedures for changing the terms of the policy
		A = Denominator Percentage is APPS THAT TRANSMIT, not just all apps
[truncated: 121 more rows]

[truncated: 3 more sheets: Table - Vulnerabilities, Table - Permissions, List Sources]
