# Supplementary material for: Unaddressed privacy risks in accredited health and wellness apps: a cross-sectional systematic assessment
Source: Springer Nature journal article supplement (doi:10.1186/s12916-015-0444-y), 2015-09-07
Supplement: MOESM1 [file 9759038]

Table AF1

**Data types identified in app data collections and transmissions**

| <b>Data type group</b>                                                                                                                                                  | <b>Data type</b>                                        |
|-------------------------------------------------------------------------------------------------------------------------------------------------------------------------|---------------------------------------------------------|
| Strong personal Identifiers – Personal information that alone may uniquely identify an individual or allow identity to be compromised.                                  | Date of birth                                           |
|                                                                                                                                                                         | Email address                                           |
|                                                                                                                                                                         | Financial/Payment Details                               |
|                                                                                                                                                                         | Fixed Device Identifier (e.g. IMEI Number, MAC Address) |
|                                                                                                                                                                         | Full Name                                               |
|                                                                                                                                                                         | Full Postcode (Zip Code)                                |
|                                                                                                                                                                         | Medical System Numbers (e.g. Insurer Number)            |
|                                                                                                                                                                         | Others Contact Details                                  |
|                                                                                                                                                                         | Photographs of People                                   |
|                                                                                                                                                                         | Postal Address                                          |
|                                                                                                                                                                         | Social Network Credentials                              |
|                                                                                                                                                                         | Social Security Number                                  |
|                                                                                                                                                                         | Telephone Numbers                                       |
| Username and/or Password                                                                                                                                                |                                                         |
| Weaker Personal Identifiers – Personal information that may be combined or linked to other data to uniquely identify an individual or allow identity to be compromised. | Age or Year of Birth                                    |
|                                                                                                                                                                         | Arbitrary Unique Identifier (e.g. Pseudonymization Key) |
|                                                                                                                                                                         | Country or Area or Partial Postcode (Zip Code)          |
|                                                                                                                                                                         | First Name                                              |
|                                                                                                                                                                         | Gender                                                  |
|                                                                                                                                                                         | Geolocation Information                                 |
| Health-Related Information – Sensitive personal information relating to health status and medical history.                                                              | Disability Status                                       |
|                                                                                                                                                                         | Genetic Information                                     |
|                                                                                                                                                                         | HIV Status                                              |
|                                                                                                                                                                         | IVF Information                                         |
|                                                                                                                                                                         | Measured Parameters (e.g. Weight, Blood Glucose)        |
|                                                                                                                                                                         | Medical History                                         |
|                                                                                                                                                                         | Medications                                             |
|                                                                                                                                                                         | Mental Health Status                                    |
| Substance Use                                                                                                                                                           |                                                         |
| Other Sensitive Information – Sensitive personal information not covered in Health-Related                                                                              | Employment Status                                       |
|                                                                                                                                                                         | Ethnicity                                               |
|                                                                                                                                                                         | Political Affiliation                                   |

| <b>Data type group</b>                                                                  | <b>Data type</b>                                |
|-----------------------------------------------------------------------------------------|-------------------------------------------------|
| Information.                                                                            | Religious Beliefs                               |
|                                                                                         | Sexuality                                       |
| Other User-Generated Data –<br>personal information not covered<br>in categories above. | Hobbies and Interests                           |
|                                                                                         | User-Generated Content Not Otherwise Covered    |
| Analytics Data                                                                          | Usage Data                                      |
| Protocol-Standard Data <sup>a</sup>                                                     | Device Characteristics (e.g. User-Agent Header) |
|                                                                                         | IP Address                                      |

<sup>a</sup> Data sent routinely as part of network communications over which app has limited control.

Figure AF2

## How a “man-in-the-middle” attack can be extended to intercept secure network communication

Secure communication commonly involves the exchange of certificates that verify identity and allow data to be encrypted before sending across a network. By intercepting the initial secure connection setup process (1) and impersonating the mobile device’s identity (2), an intercepting computer can gain access to a legitimate certificate (3) while issuing its own, bogus certificate (4). Once hijacked, an attacker can both read encrypted outgoing traffic (5) as well as any incoming data (6). In a real-world setting, configuration settings on the user device must typically be altered so that it does not reject the bogus certificate. Technical details have been simplified to communicate key principles.

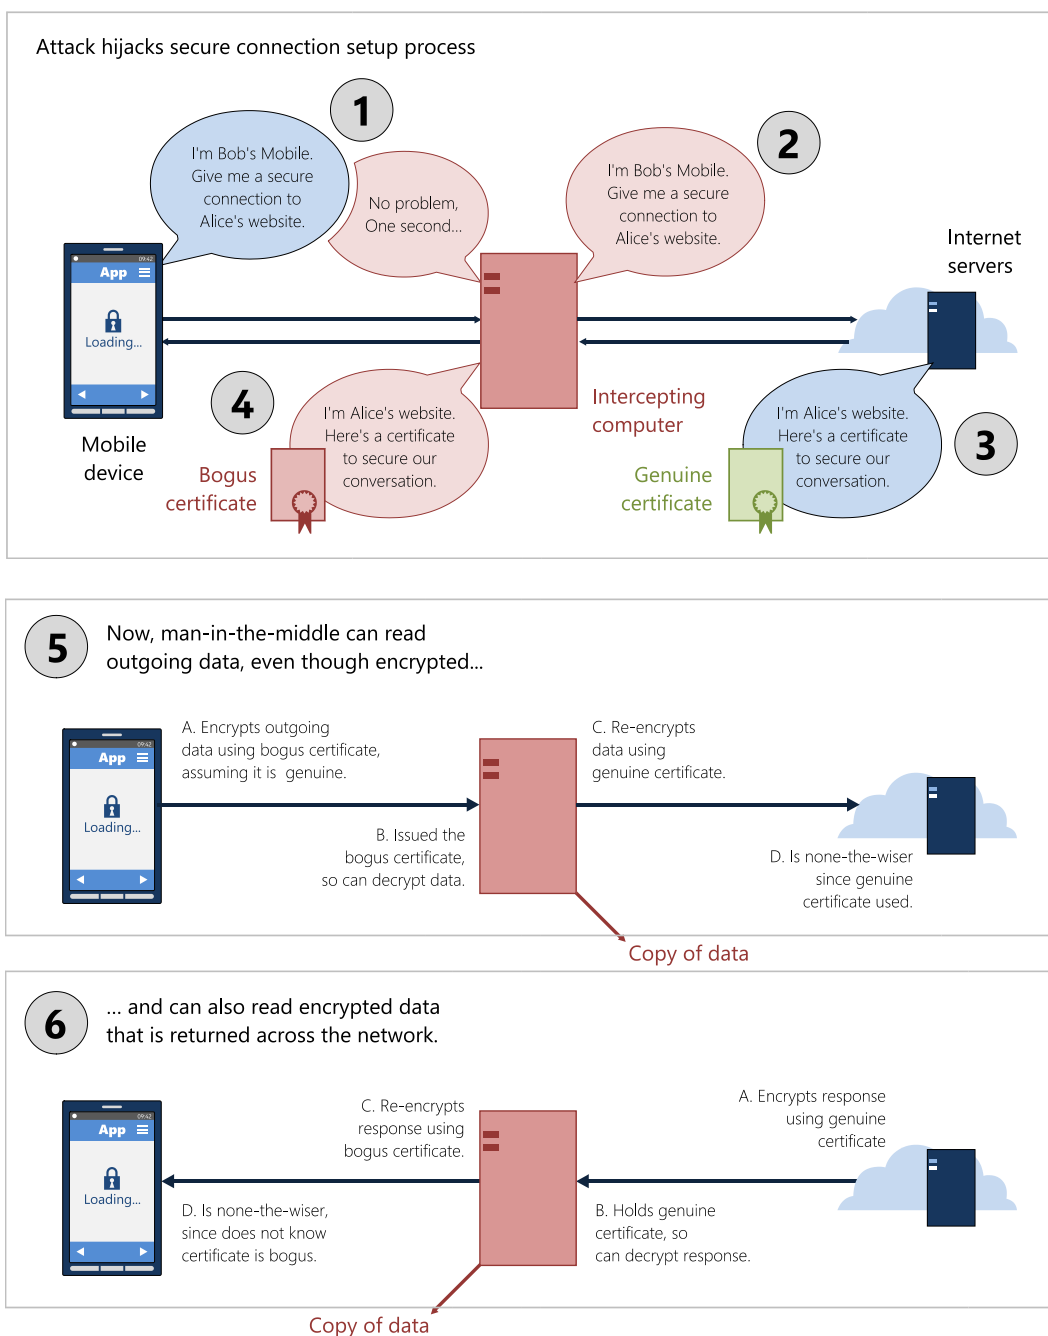

Figure AF3

### Screenshot of custom software used to review transmitted data

Software reconciled outgoing requests generated by apps and the responses received from Internet-based servers, and allowed the content of these paired request-response messages to be inspected. The overall purpose of the message as well as transmission of specific data types could then be annotated using the tool. In the toy example shown, transmission of a user email address to a cloud service provided by the app developer has been identified in an encrypted message.

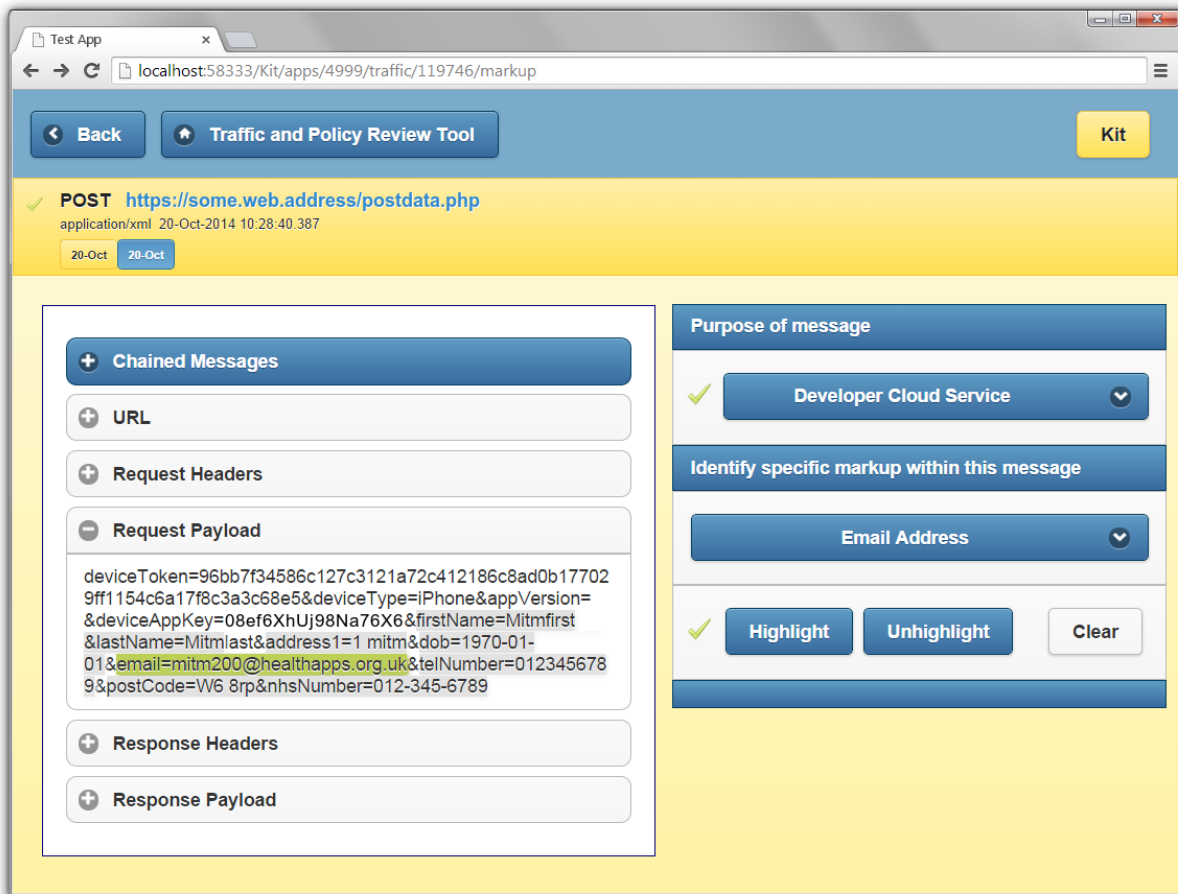

Table AF4

**Coding schema used to assess the privacy and security-related content of policy documents**

| Domain                 | Topic                                                                                                                                                                                                                                                                                                                                                                                                                                                                                                                                                                                                   |
|------------------------|---------------------------------------------------------------------------------------------------------------------------------------------------------------------------------------------------------------------------------------------------------------------------------------------------------------------------------------------------------------------------------------------------------------------------------------------------------------------------------------------------------------------------------------------------------------------------------------------------------|
| Uses of data           | <ul style="list-style-type: none"> <li>• Primary uses of collected data (e.g. administering accounts, contacting users, providing and improving services)</li> <li>• Secondary uses of collected data (e.g. repackaging data for research or marketing purposes, mandatory disclosures)</li> <li>• Sending data to developer-provided online services (e.g. online databases)</li> <li>• Sending data to advertisers/marketers</li> <li>• Sending data for analytics/research</li> <li>• Sending data while loading content (e.g. satisfying search requests)</li> <li>• Anonymous uses only</li> </ul> |
| Technical concerns     | <ul style="list-style-type: none"> <li>• Technical and procedural security arrangements (e.g. anonymization, encrypted data transport, secure servers, limited access, backup)</li> <li>• How long data will be retained</li> <li>• Inherent risks or limitations of security on mobile device/Internet</li> <li>• The use of cookies</li> </ul>                                                                                                                                                                                                                                                        |
| User rights            | <ul style="list-style-type: none"> <li>• Procedures for opting out of data sharing</li> <li>• Consequences of not providing or sharing data</li> <li>• Procedures for subject access requests</li> <li>• Editing and deleting data held by developers/third parties</li> <li>• Complaints procedures</li> <li>• Special procedures for handling data for vulnerable users and minors</li> </ul>                                                                                                                                                                                                         |
| Administrative details | <ul style="list-style-type: none"> <li>• Identify of data controller or responsible legal entity</li> <li>• Legal jurisdiction governing policy</li> <li>• Jurisdictions under which transmitted data will be processed</li> <li>• Date of policy</li> <li>• Date of next review</li> <li>• Procedures for changing the terms of the policy</li> </ul>                                                                                                                                                                                                                                                  |



Figure AF5

## Screenshot of custom software used to annotate policy text

Software supported a step-by-step process of review for each policy document to identify whether specific aspects of the policy coding schema were addressed. Relevant policy text could be selected and annotated. In the example shown, text relating to the transmission of data for analytics purposes has been identified.

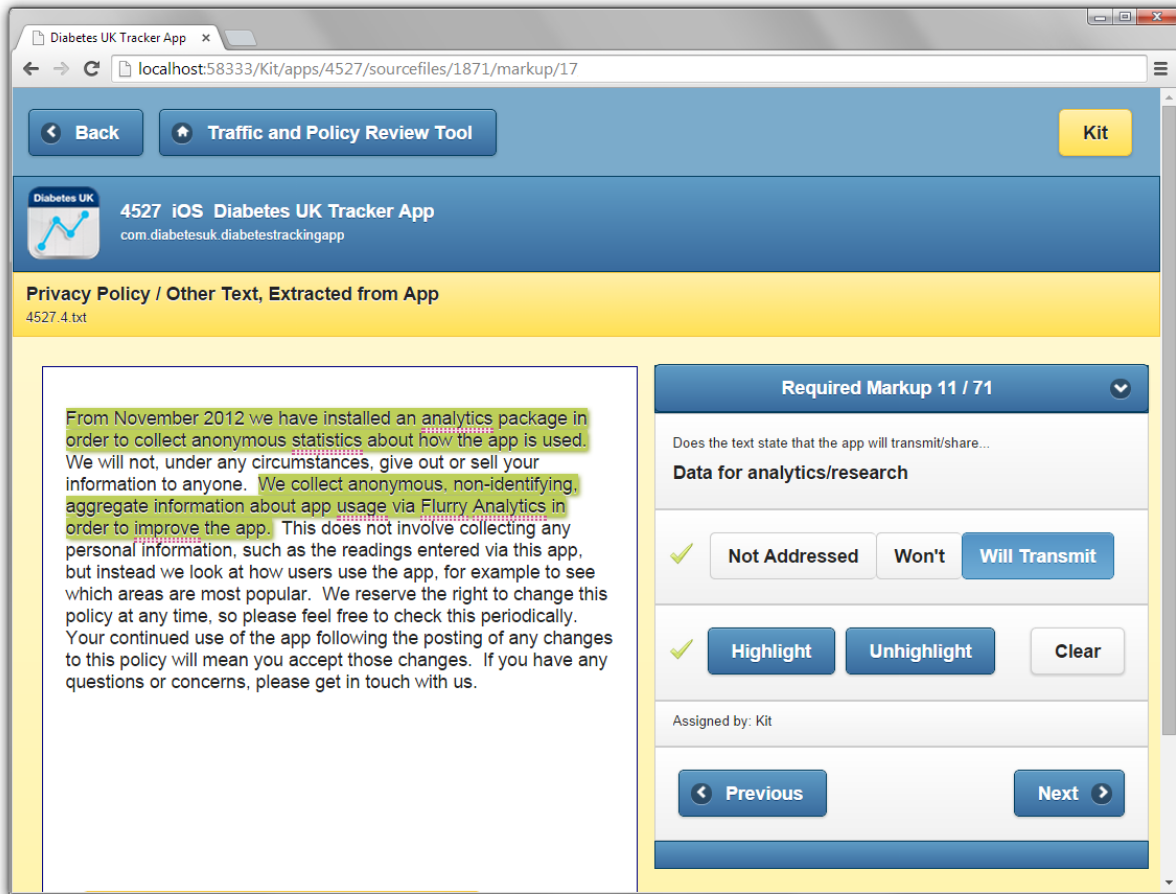

Table AF6

**Characteristics of excluded apps**

| App Name                           | <a href="#">Available for iOS platform?</a>          | <a href="#">Available for Android platform?</a> | Developer                      | Cost       | Reason for Exclusion                                             |
|------------------------------------|------------------------------------------------------|-------------------------------------------------|--------------------------------|------------|------------------------------------------------------------------|
| eRedbook                           | Yes (0.35)                                           | No                                              | Sitekit Solutions Ltd          | Free       | Unable to log in.                                                |
| FoUp for Patient                   | Yes (1.0)                                            | Yes (1.0)                                       | Mobilelite Ltd                 | Free       | Not available for download (iOS).<br>Unable to log in (Android). |
| FoodWiz                            | Yes (1.3)                                            | Yes (1.5)                                       | Food Angels UK Ltd.            | Free       | Unable to log in (iOS).<br>Would not start (Android).            |
| Health Fabric                      | Yes (Unknown)                                        | Yes (Unknown)                                   | Sensory Software International | Free       | Not available for download (Android).<br>Unable to log in (iOS). |
| HIV Test Finder                    | Yes (2.1)                                            | No                                              | Thomas Paterson                | Free       | Duplicate of Aidsmap News.                                       |
| mproAutism                         | Yes (1.0.3)                                          | Yes (1.0.3)                                     | Crimson Tide Mpro Limited      | Free       | Unable to log in.                                                |
| Predictable                        | Yes (3.3)                                            | No                                              | Therapy Box Limited            | 178.18 USD | App cost (£109.99) exceeds threshold.                            |
| Stable Angina Patient Decision Aid | <del>No</del> <a href="#">Yes (1.7)</a> <sup>a</sup> | Yes (1.7)                                       | Totally Health                 | Free       | Not compatible with any test device (Android).                   |
| Talking Point                      | <del>No</del> <a href="#">Yes (105)</a> <sup>a</sup> | Yes (2.4.8.3)                                   | Alzheimer's Society            | Free       | Would not start (Android).                                       |
| The Linden Method                  | Yes (2.0)                                            | No                                              | Lifewise Publishing Ltd        | 90.49 USD  | App cost (£55.86) exceeds threshold.                             |
| Unity Core                         | Yes (1.0.1)                                          | No                                              | Liberator Ltd                  | 153.88     | Duplicate of Unity                                               |



| App Name | <a href="#">Available for iOS platform?</a> | <a href="#">Available for Android platform?</a> | Developer | Cost | Reason for Exclusion                            |
|----------|---------------------------------------------|-------------------------------------------------|-----------|------|-------------------------------------------------|
|          |                                             |                                                 |           | USD  | Core Lite. App cost (£94.99) exceeds threshold. |

<sup>a</sup> iOS versions of these apps were not affected by installation or start-up problems and were included in the study. They are not included in the count of excluded apps, therefore.

Table AF7

**Characteristics of included apps**

| <b>App Name</b>                        | <b><a href="#">Available for iOS platform?</a></b> | <b><a href="#">Available for Android platform?</a></b> | <b>Developer</b>     | <b>Cost</b> | <b>App Features</b>                                                                       |
|----------------------------------------|----------------------------------------------------|--------------------------------------------------------|----------------------|-------------|-------------------------------------------------------------------------------------------|
| Aidsmap News                           | Yes (2.1)                                          | No                                                     | Thomas Paterson      | Free        | Information                                                                               |
| Antifungal Interactions                | Yes (1.12)                                         | Yes (1.0)                                              | Graham Atherton      | 4.84 USD    | Information                                                                               |
| British Heart Foundation Recipe Finder | Yes (2.0)                                          | Yes (1.0)                                              | Precedent            | Free        | Information                                                                               |
| Brush DJ                               | Yes (1.5)                                          | Yes (1.6)                                              | Benjamin Underwood   | Free        | Utility Function (Tooth Brushing Timer), Reminders                                        |
| BSU Health                             | Yes (2.1)                                          | Yes (1.06)                                             | NC Bath Ltd          | Free        | Information, Health Promotion (Smoking, Alcohol, Drugs, Sexual Health), Service Directory |
| Calorie Counter +                      | Yes (2.4.1)                                        | Yes (2.2.5)                                            | NutraTech Ltd        | Free        | Health Promotion (Exercise/Weight Loss), Diary/Personal Health Record                     |
| Cancer Emergency Response Tool – CERT  | No                                                 | Yes (1.01)                                             | Dorset Cancer Centre | Free        | Self-Management (Cancer), Self-Assessment, Symptom Checker, Therapy Management            |
| CarePair                               | Yes (1.0)                                          | No                                                     | Russell Smith        | Free        | Social Network                                                                            |
| Change4Life drinks tracker             | Yes (1.6)                                          | Yes (1.4)                                              | NHS Choices          | Free        | Health Promotion (Alcohol), Research Project, Information                                 |

| <b>App Name</b>                          | <a href="#">Available for iOS platform?</a> | <a href="#">Available for Android platform?</a> | <b>Developer</b>                          | <b>Cost</b> | <b>App Features</b>                                                   |
|------------------------------------------|---------------------------------------------|-------------------------------------------------|-------------------------------------------|-------------|-----------------------------------------------------------------------|
| Change4Life Fun Generator                | Yes (1.0)                                   | Yes (1.0)                                       | NHS Choices                               | Free        | Health Promotion (Exercise/Weight Loss), Information                  |
| Change4Life Healthier Recipes            | Yes (1.4)                                   | Yes (1.2)                                       | NHS Choices                               | Free        | Health Promotion (Healthy Eating), Research Project, Information      |
| Coronary Angiogram eSupport for patients | Yes (1.0.0)                                 | No                                              | Norton-Bates                              | 4.84 USD    | Information, Diary/Personal Health Record, Therapy Management         |
| Dentify                                  | Yes (1.0)                                   | Yes (1.0)                                       | Yatisha Patel                             | 1.6 USD     | Information                                                           |
| Depression Calculator                    | Yes (1.0)                                   | No                                              | Patient.co.uk                             | Free        | Self-Assessment, Symptom Checker (Depression)                         |
| Diabetes Manager                         | Yes (1.0)                                   | No                                              | Patient.co.uk                             | Free        | Self-Management (Diabetes), Diary/Personal Health Record, Information |
| Diabetes Risk Checker                    | Yes (1.0)                                   | Yes (1.0)                                       | Click Innovate Ltd                        | 1.6 USD     | Self-Assessment, Risk Checker (Diabetes)                              |
| Diabetes UK Tracker App                  | Yes (331)                                   | Yes (1.4)                                       | Diabetes UK                               | Free        | Self-Management (Diabetes), Diary/Personal Health Record              |
| Dr iSeb                                  | Yes (1.0)                                   | No                                              | Dr iSeb limited                           | Free        | Information                                                           |
| DrinkCoach                               | Yes (1.4)                                   | No                                              | Haringey Advisory Group on Alcohol (HAGA) | Free        | Health Promotion (Alcohol), Diary/Personal Health Record              |

| <b>App Name</b>                  | <a href="#"><u>Available for iOS platform?</u></a> | <a href="#"><u>Available for Android platform?</u></a> | <b>Developer</b>   | <b>Cost</b> | <b>App Features</b>                                                                          |
|----------------------------------|----------------------------------------------------|--------------------------------------------------------|--------------------|-------------|----------------------------------------------------------------------------------------------|
| Drinks Meter                     | Yes (1.2)                                          | Yes (1.3)                                              | Global Drug Survey | Free        | Health Promotion (Alcohol, Drugs), Research Project, Self-Assessment, Risk Checker (Alcohol) |
| Epilepsy Toolkit                 | Yes (4.3)                                          | No                                                     | MCM Net Limited    | Free        | Information, Self-Management (Epilepsy)                                                      |
| Fairfield Park Health Centre     | Yes (1.3)                                          | Yes (1.1)                                              | NC Bath Ltd        | Free        | Information, Health Promotion (Smoking, Alcohol, Drugs, Sexual Health), Service Directory    |
| Find NHS Services near you       | No                                                 | Yes (0.2)                                              | Smart Droid        | Free        | Information, Service Directory                                                               |
| Finerday                         | No                                                 | Yes (1.2)                                              | Mobilelite Ltd     | Free        | Social Network                                                                               |
| Gallstones eSupport for Patients | Yes (1.0.0)                                        | No                                                     | Norton-Bates       | 4.84 USD    | Information, Diary/Personal Health Record, Therapy Management                                |
| Gastric Band - eSupport          | Yes (1.0.3)                                        | No                                                     | Norton-Bates       | 3.22 USD    | Information, Diary/Personal Health Record, Therapy Management                                |
| Gastric Bypass - eSupport        | Yes (1.0.3)                                        | No                                                     | Norton-Bates       | 3.22 USD    | Information, Diary/Personal Health Record, Therapy Management                                |
| Gastric Sleeve -                 | Yes (1.0.3)                                        | No                                                     | Norton-Bates       | 3.22        | Information,                                                                                 |

| <b>App Name</b>                           | <a href="#"><u>Available for iOS platform?</u></a> | <a href="#"><u>Available for Android platform?</u></a> | <b>Developer</b>                | <b>Cost</b> | <b>App Features</b>                                                                       |
|-------------------------------------------|----------------------------------------------------|--------------------------------------------------------|---------------------------------|-------------|-------------------------------------------------------------------------------------------|
| eSupport                                  |                                                    |                                                        |                                 | USD         | Diary/Personal Health Record, Therapy Management                                          |
| Grid Player                               | Yes (1.5.0.0)                                      | No                                                     | Sensory Software International  | Free        | Assistive Technology                                                                      |
| Hearts and Minds                          | No                                                 | Yes (1.2)                                              | Garwood Medical                 | 1.12 USD    | Self-Assessment, Risk Checker (Cardiovascular Disease)                                    |
| howRU Health Tracker                      | Yes (1.4.0)                                        | No                                                     | Routine Health Outcomes Ltd     | Free        | Diary/Personal Health Record                                                              |
| iBreastCheck                              | Yes (8)                                            | Yes (1.0.3)                                            | Breakthrough Breast Cancer      | Free        | Information, Self-Assessment, Risk Checker (Breast Cancer Risk)                           |
| Isabel Symptom Checker                    | Yes (1.1)                                          | Yes (1.0)                                              | Isabel Healthcare               | Free        | Self-Assessment, Symptom Checker (Differential Diagnosis)                                 |
| iSightTest                                | Yes (1.6)                                          | No                                                     | Kay Pictures Ltd                | 34 USD      | Self-Assessment (Eyesight)                                                                |
| Kent C Card                               | Yes (1.1)                                          | Yes (1.2)                                              | Kent Community Health NHS Trust | Free        | Information, Health Promotion (Sexual Health), Service Directory                          |
| King St and University Practice Lancaster | Yes (1.4)                                          | Yes (1.07)                                             | NC Bath Ltd                     | Free        | Information, Health Promotion (Smoking, Alcohol, Drugs, Sexual Health), Service Directory |

| <b>App Name</b>               | <a href="#">Available for iOS platform?</a> | <a href="#">Available for Android platform?</a> | <b>Developer</b>            | <b>Cost</b> | <b>App Features</b>                                                                         |
|-------------------------------|---------------------------------------------|-------------------------------------------------|-----------------------------|-------------|---------------------------------------------------------------------------------------------|
| Knee Athroscopy -eSupport     | Yes (1.0.0)                                 | No                                              | Norton-Bates                | 4.84 USD    | Information, Diary/Personal Health Record, Therapy Management                               |
| Lab Tests Online UK           | Yes (1.0.0)                                 | Yes (1.0.00)                                    | ACB                         | Free        | Information                                                                                 |
| LIFESAVER                     | Yes (1.0.0)                                 | Yes (1.01)                                      | Unit9                       | Free        | Information, First Aid Training                                                             |
| Lymphoedema Breast Cancer App | Yes (1.0.0)                                 | Yes (1.0)                                       | Kelly Foote                 | 3.22 USD    | Information, Self-Management (Lymphedema), Diary/Personal Health Record, Therapy Management |
| Me and Mine Health            | Yes (1.0)                                   | No                                              | App Physio                  | 2.11 USD    | Self-Management (General), Diary/Personal Health Record                                     |
| Me, Myself, and I             | Yes (1.5)                                   | No                                              | Serious Games International | 16.18 USD   | Game                                                                                        |
| Medimapp                      | Yes (2026)                                  | No                                              | Medimapp Limited            | Free        | Information, Service Directory                                                              |
| Meningitis Signs and Symptoms | Yes (1.0.1)                                 | Yes (1.0)                                       | Meningitis Trust            | Free        | Information, Game                                                                           |
| MyChoicePad Lite              | Yes (943)                                   | No                                              | Insane Logic Ltd.           | Free        | Assistive Technology                                                                        |
| NHS 24 MSK Help               | Yes (1.6)                                   | Yes (1.7)                                       | NHS 24                      | Free        | Information, Self-Management (Musculoskeletal Problems)                                     |

| <b>App Name</b>                                         | <a href="#"><u>Available for iOS platform?</u></a> | <a href="#"><u>Available for Android platform?</u></a> | <b>Developer</b>                                   | <b>Cost</b> | <b>App Features</b>                                                                     |
|---------------------------------------------------------|----------------------------------------------------|--------------------------------------------------------|----------------------------------------------------|-------------|-----------------------------------------------------------------------------------------|
| NHS BMI healthy weight calculator and tracker           | Yes (1.3)                                          | No                                                     | NHS Choices                                        | Free        | Health Promotion (Exercise/Weight Loss), Diary/Personal Health Record, Research Project |
| NHS Drinks Tracker                                      | Yes (1.0)                                          | No                                                     | NHS Choices                                        | Free        | Health Promotion (Alcohol), Diary/Personal Health Record, Research Project              |
| NHS Health and Symptom Checkers                         | Yes (2.0.1)                                        | Yes (2.0.1)                                            | NHS Direct                                         | Free        | Information, Self-Assessment, Symptom Checker (Differential Diagnosis)                  |
| NHS Quit Smoking                                        | Yes (1.3)                                          | No                                                     | NHS Choices                                        | Free        | Health Promotion (Smoking), Information                                                 |
| NTW – Northumberland Tyne and Wear NHS Foundation Trust | Yes (1.0.3)                                        | Yes (1.0.9)                                            | Northumberland, Tyne and Wear NHS Foundation Trust | Free        | Information                                                                             |
| Numberhood                                              | Yes (1.4)                                          | No                                                     | OCSI                                               | Free        | Information                                                                             |
| OATBook                                                 | Yes (2.3)                                          | No                                                     | Rob Cleaton                                        | 4.84 USD    | Self-Management (Medication), Therapy Management                                        |
| Panic Attack Aid                                        | Yes (1.0)                                          | Yes (1.0)                                              | Panic Attack Aid                                   | 8.08 USD    | Self-Management (Panic Attacks), Information, Self-                                     |

| App Name                | <a href="#">Available for iOS platform?</a> | <a href="#">Available for Android platform?</a> | Developer             | Cost     | App Features                                                                                                                        |
|-------------------------|---------------------------------------------|-------------------------------------------------|-----------------------|----------|-------------------------------------------------------------------------------------------------------------------------------------|
|                         |                                             |                                                 |                       |          | Management Tool                                                                                                                     |
| Parkinson's UK EasyCall | Yes (1.2.0.2)                               | Yes (2.0.0)                                     | Parkinson's UK        | Free     | Assistive Technology, Self-Management (Parkinson's Disease)                                                                         |
| Patient IBS             | Yes (1.0.1)                                 | Yes (1.0)                                       | Patient.co.uk         | 3.22 USD | Self-Management (IBS), Diary/Personal Health Record, Information                                                                    |
| Patient.co.uk           | Yes (3.0)                                   | Yes (2.1)                                       | Patient.co.uk         | Free     | Information                                                                                                                         |
| PillManager             | Yes (2.0.2)                                 | Yes (2.1.1)                                     | Healthnet Limited     | Free     | Self-Management (Medication, Diabetes, Hypertension), Diary/Personal Health Record, Service Directory, Pharmacy Services, Reminders |
| Rally Round             | Yes (1.3)                                   | No                                              | Health2Works Ltd      | Free     | Social Network                                                                                                                      |
| RCP Stroke Guideline    | Yes (2.0)                                   | Yes (1.0)                                       | Cranworth Medical Ltd | Free     | Information, Self-Management (Stroke)                                                                                               |
| SiKL                    | Yes (2023)                                  | No                                              | NULL                  | Free     | Self-Management (Sickle Cell Anemia)                                                                                                |
| Sleep Diary             | Yes (1.2)                                   | No                                              | Patient.co.uk         | Free     | Diary/Personal Health Record, Health Promotion (Sleep), Information                                                                 |
| Smoke Free              | Yes (1.3)                                   | No                                              | David Crane           | Free     | Health Promotion (Smoking), Research Project, Diary/Personal Health                                                                 |



| App Name                              | <a href="#">Available for iOS platform?</a> | <a href="#">Available for Android platform?</a>          | Developer           | Cost     | App Features                                                                                   |
|---------------------------------------|---------------------------------------------|----------------------------------------------------------|---------------------|----------|------------------------------------------------------------------------------------------------|
|                                       |                                             |                                                          |                     |          | Record, Information                                                                            |
| Smoking Time Machine                  | Yes (1.0.3)                                 | Yes (1.0.2)                                              | Rancon              | 1.6 USD  | Heath Promotion (Smoking)                                                                      |
| Stable Angina Patient Decision Aid    | Yes (1.7)                                   | <del>No</del> <a href="#">Yes (1.7)</a> <sup>a</sup>     | Totally Health Ltd. | Free     | Information                                                                                    |
| Stomawise Travel Certificate          | Yes (1.1.0)                                 | Yes (1.1.0)                                              | John Walsh          | Free     | Utility Function (Multilingual Stoma Information), Self-Management (Stoma), Therapy Management |
| Talking Point                         | Yes (105)                                   | <del>No</del> <a href="#">Yes (2.4.8.3)</a> <sup>a</sup> | Alzheimer's Society | Free     | Social Network                                                                                 |
| Total Baby                            | Yes (3.1.2)                                 | No                                                       | ANDESigned          | 8.08 USD | Diary/Personal Health Record, Reminders                                                        |
| Type 1 diabetes friend: alcohol guide | Yes (1.0)                                   | Yes (1.11)                                               | AP Apps             | Free     | Information                                                                                    |
| Unity Core Lite                       | Yes (1.0.1)                                 | No                                                       | Liberator Ltd       | Free     | Assistive Technology                                                                           |
| Weight Loss Surgery Scotland          | Yes (2.1)                                   | No                                                       | Richard Brady       | Free     | Information, Diary/Personal Health Record, Therapy Management                                  |
| Weight Tracker                        | Yes (1.1)                                   | Yes (1.0)                                                | Patient.co.uk       | Free     | Health Promotion (Exercise/Weight Loss), Diary/Personal Health Record                          |
| Weightplan                            | Yes (2.5.2)                                 | No                                                       | Weightplan          | Free     | Health Promotion                                                                               |

| App Name                        | <a href="#">Available for iOS platform?</a> | <a href="#">Available for Android platform?</a> | Developer                        | Cost     | App Features                                                                                                                  |
|---------------------------------|---------------------------------------------|-------------------------------------------------|----------------------------------|----------|-------------------------------------------------------------------------------------------------------------------------------|
|                                 |                                             |                                                 | Limited                          |          | (Exercise/Weight Loss), Diary/Personal Health Record, Information                                                             |
| Welcome to St George's Hospital | Yes (1.2)                                   | No                                              | St George's Healthcare NHS Trust | Free     | Health Promotion (Exercise/Weight Loss), Diary/Personal Health Record, Information                                            |
| WellHappy                       | Yes (1.2.1364468092)                        | Yes (4)                                         | NHS London                       | Free     | Health Promotion (Sexual Health, Alcohol, Drugs)                                                                              |
| Wellnote                        | Yes (3.1)                                   | No                                              | Wellnote                         | Free     | Information, Service Directory, Diary/Personal Health Record, Self-Management (Diabetes, Hypertension, Medication), Reminders |
| WheelMate                       | Yes (1.0.1)                                 | Yes (1.0.2)                                     | Coloplast                        | Free     | Information, Service Directory                                                                                                |
| Zombies, Run!                   | Yes (77)                                    | Yes (2.2.0)                                     | Six to Start                     | 6.46 USD | Health Promotion (Exercise/Weight Loss), Diary/Personal Health Record                                                         |
| Zombies, Run! 5k Training       | Yes (62)                                    | Yes (1.1)                                       | Six to Start                     | 3.22 USD | Health Promotion (Exercise/Weight Loss), Diary/Personal Health Record                                                         |

<sup>a</sup> Android versions of these apps could not be installed or would not start and were excluded.

Table AF8

**Summary of data transmissions**

| <b>Transmission destination and purpose</b> | <b>Apps transmitting data,<br/>n=70 (%)</b> | <b>Destination outside UK (% of<br/>apps transmitting <u>data</u>)</b> |
|---------------------------------------------|---------------------------------------------|------------------------------------------------------------------------|
| Developer-controlled services               | 23 (33%)                                    | <del>78</del> (30 <del>5</del> %)                                      |
| Loading content                             | 12 (17%)                                    | <del>4</del> (33%) <del>-</del>                                        |
| Account-based services                      | 7 (10%)                                     | <del>2</del> (29%) <del>-</del>                                        |
| Crowd-sourced feedback                      | 5 (7%)                                      | <del>2</del> (40%) <del>-</del>                                        |
| Research data collection                    | 5 (7%)                                      | <del>1</del> (20%) <del>-</del>                                        |
| Third parties                               | 63 (90%)                                    | 50 (79%)                                                               |
| Loading content                             | 53 (76%)                                    | 17 (32%)                                                               |
| Account-based services                      | 2 (10%)                                     | 1 (50%)                                                                |
| Crowd-sourced feedback                      | 1 (1%)                                      | 0 (0%)                                                                 |
| Marketing or advertising                    | 14 (20%)                                    | 9 (64%)                                                                |
| Analytics data collection                   | 43 (61%)                                    | 42 (98%)                                                               |
| Research data collection                    | 1 (1%)                                      | 1 (100 <del>00</del> %)                                                |
